# Supplementary material
Source: PubMed Central journal article supplement (PMC4762516)

A A A A A A A A A A A A A A A A A A G A G A G A G A K

b<sub>2</sub> b<sub>3</sub> b<sub>4</sub> b<sub>5</sub> b<sub>7</sub> b<sub>8</sub> b<sub>9</sub> b<sub>10</sub> b<sub>11</sub> b<sub>12</sub> y<sub>13</sub> y<sub>12</sub> y<sub>11</sub> y<sub>10</sub> y<sub>9</sub> y<sub>8</sub> y<sub>7</sub> y<sub>6</sub> y<sub>5</sub> y<sub>3</sub> y<sub>2</sub> y<sub>1</sub>

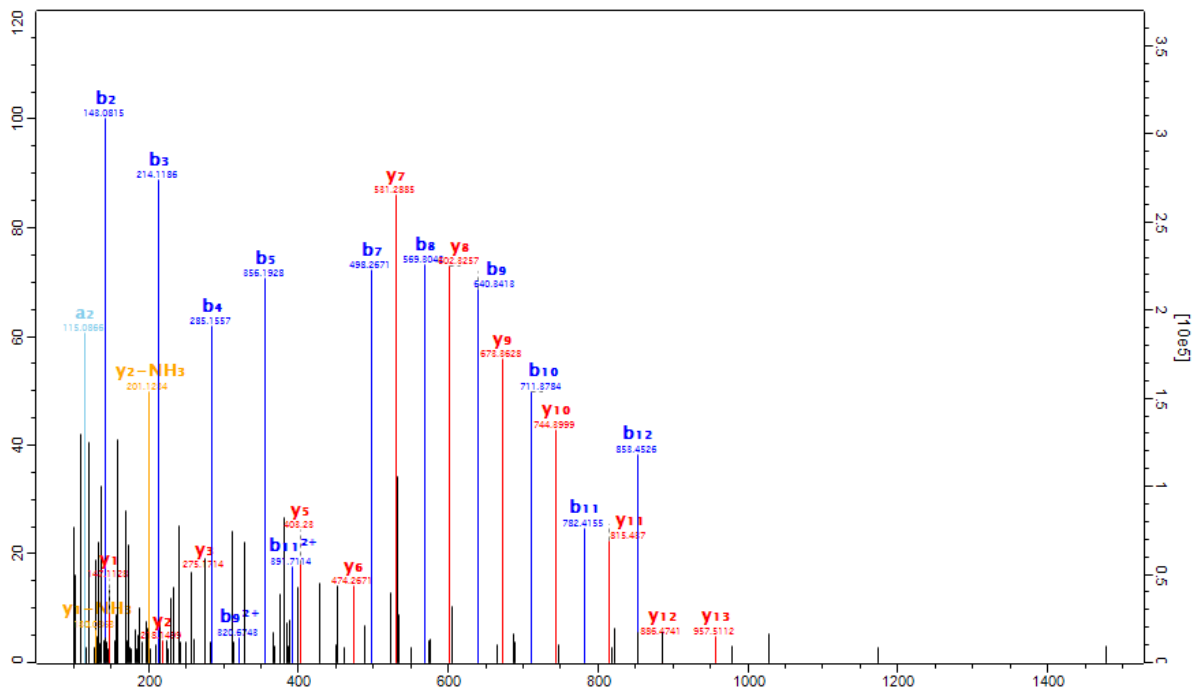

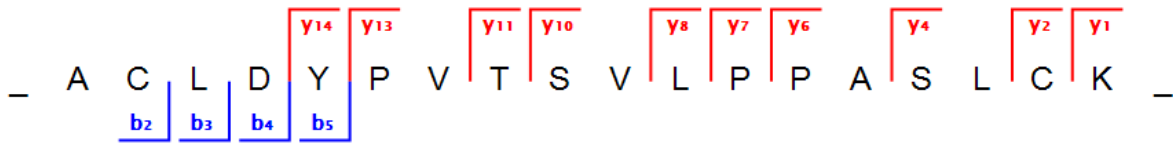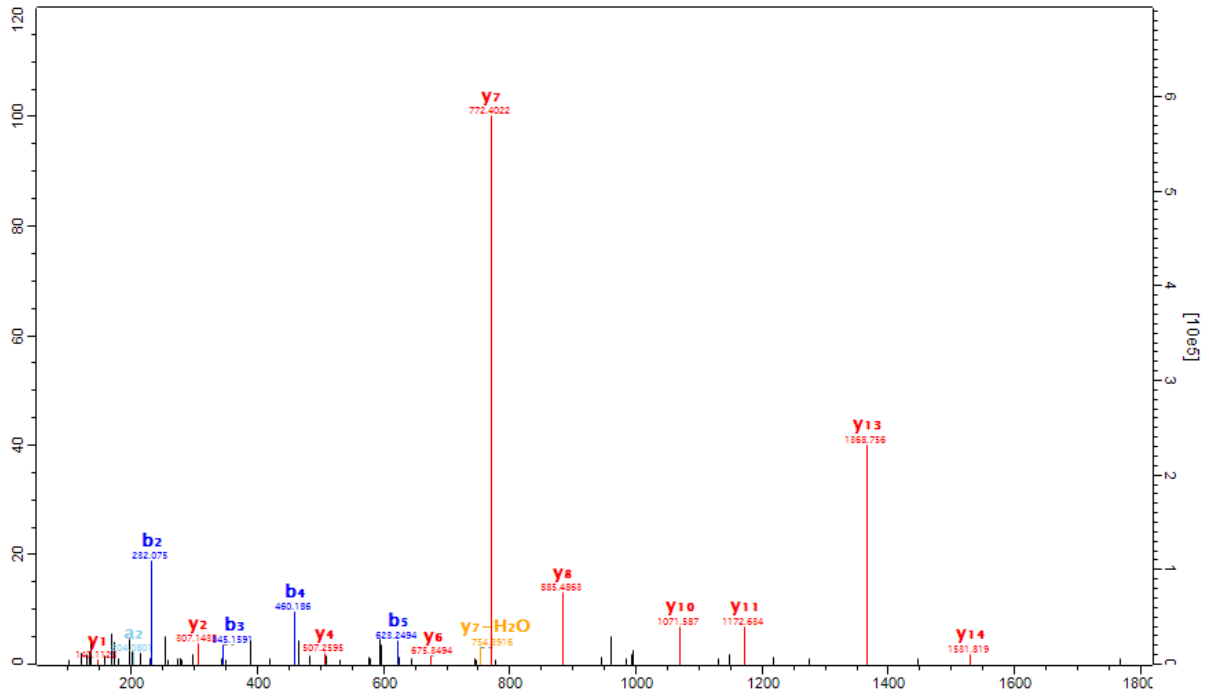

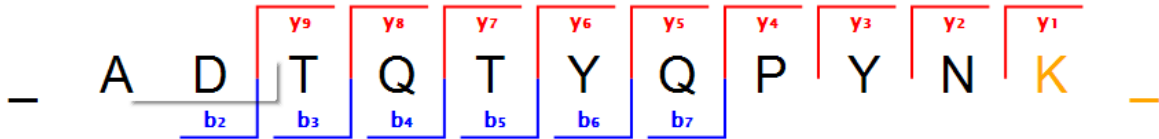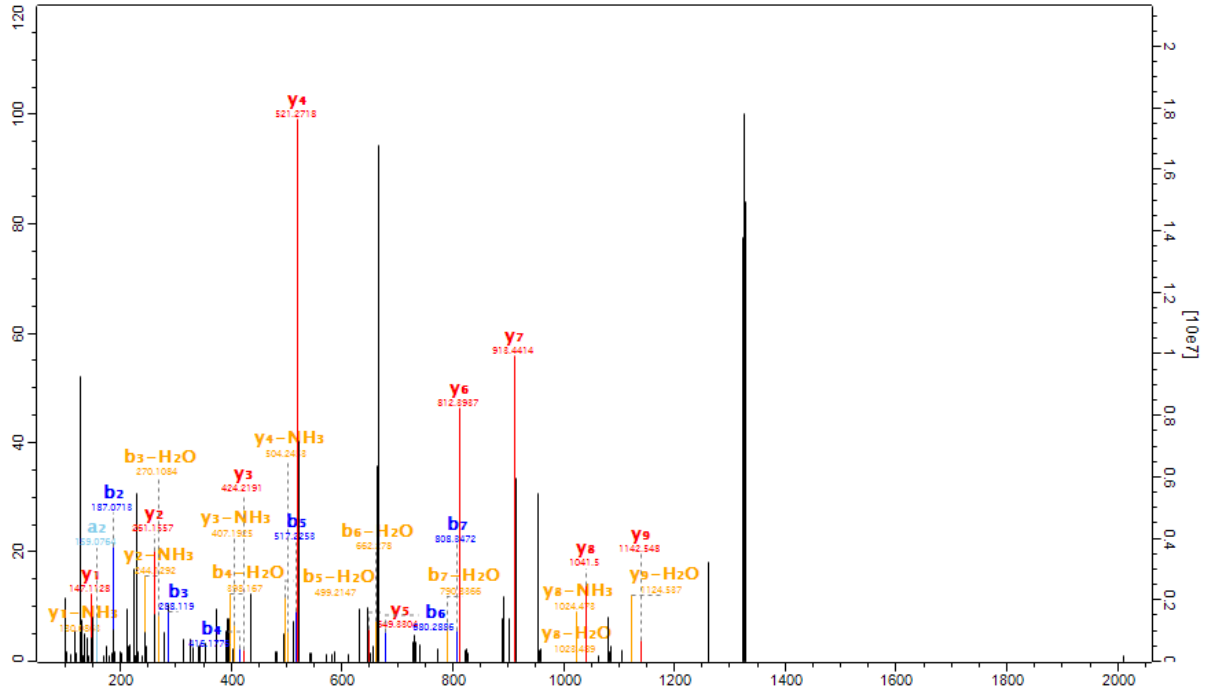

— A D V L T T G A G N P V G D K —  
           b<sub>2</sub> b<sub>3</sub> b<sub>4</sub> b<sub>5</sub>           y<sub>12</sub> y<sub>11</sub> y<sub>10</sub> y<sub>9</sub> y<sub>8</sub> y<sub>7</sub> y<sub>6</sub> y<sub>5</sub>           y<sub>3</sub>           y<sub>1</sub>

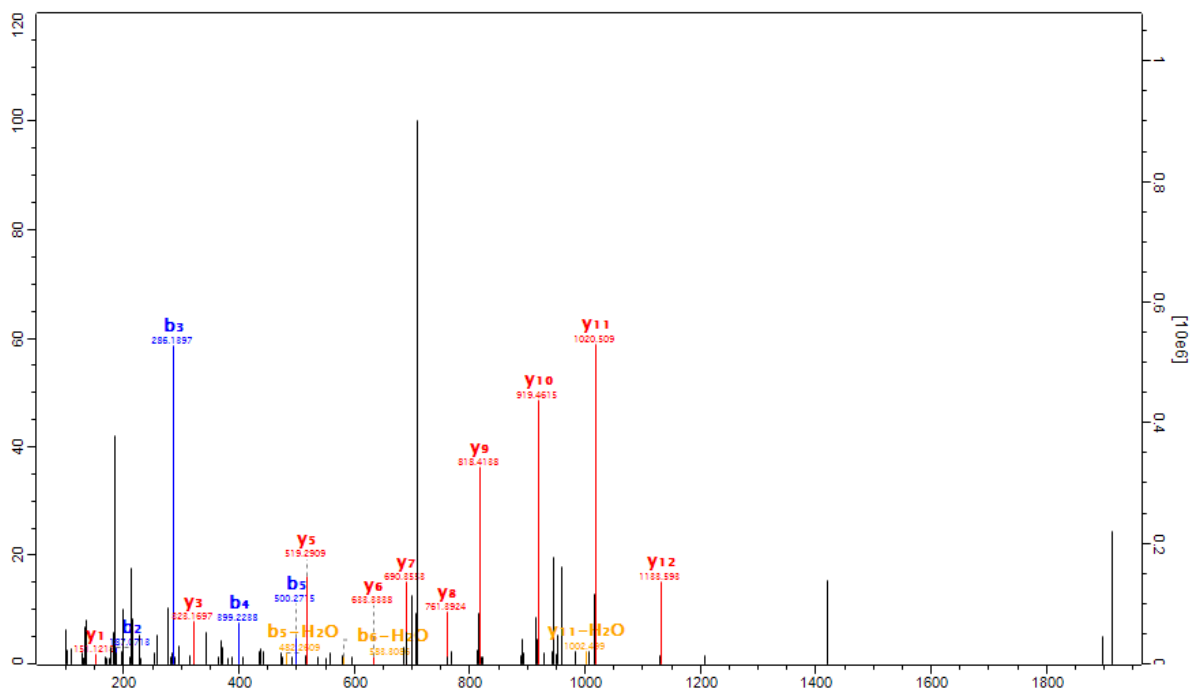

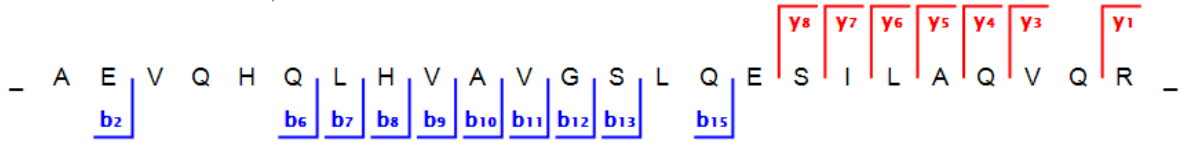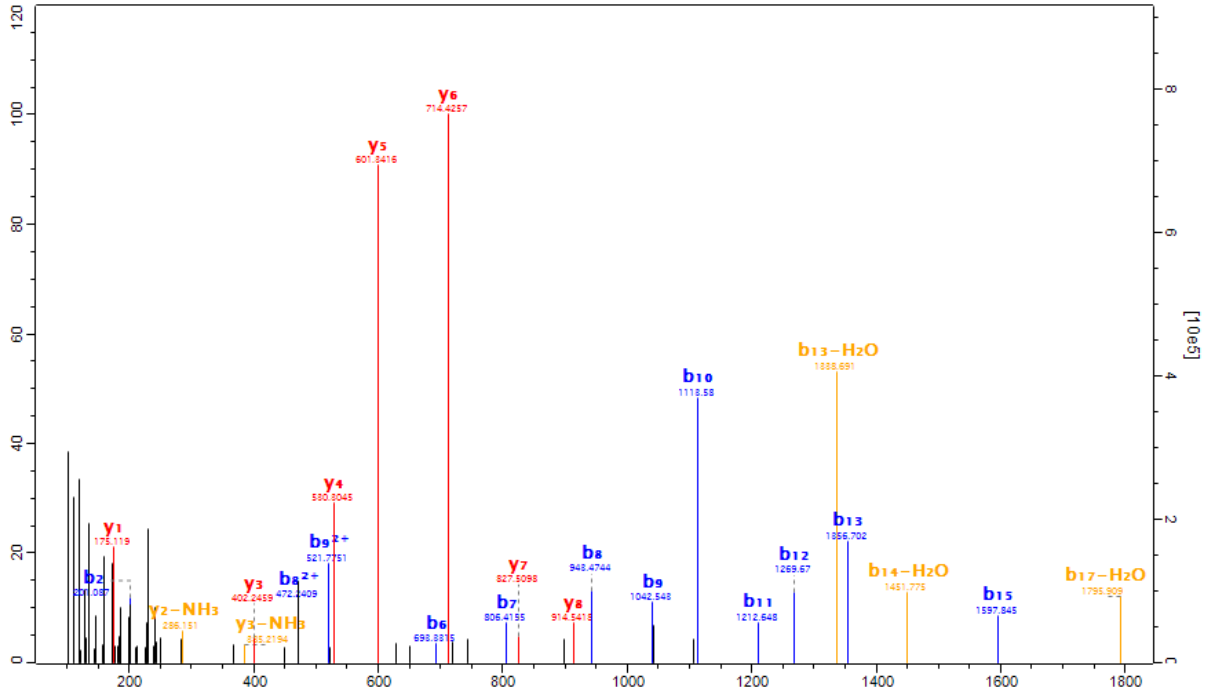

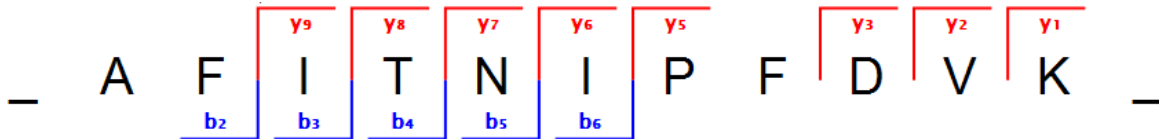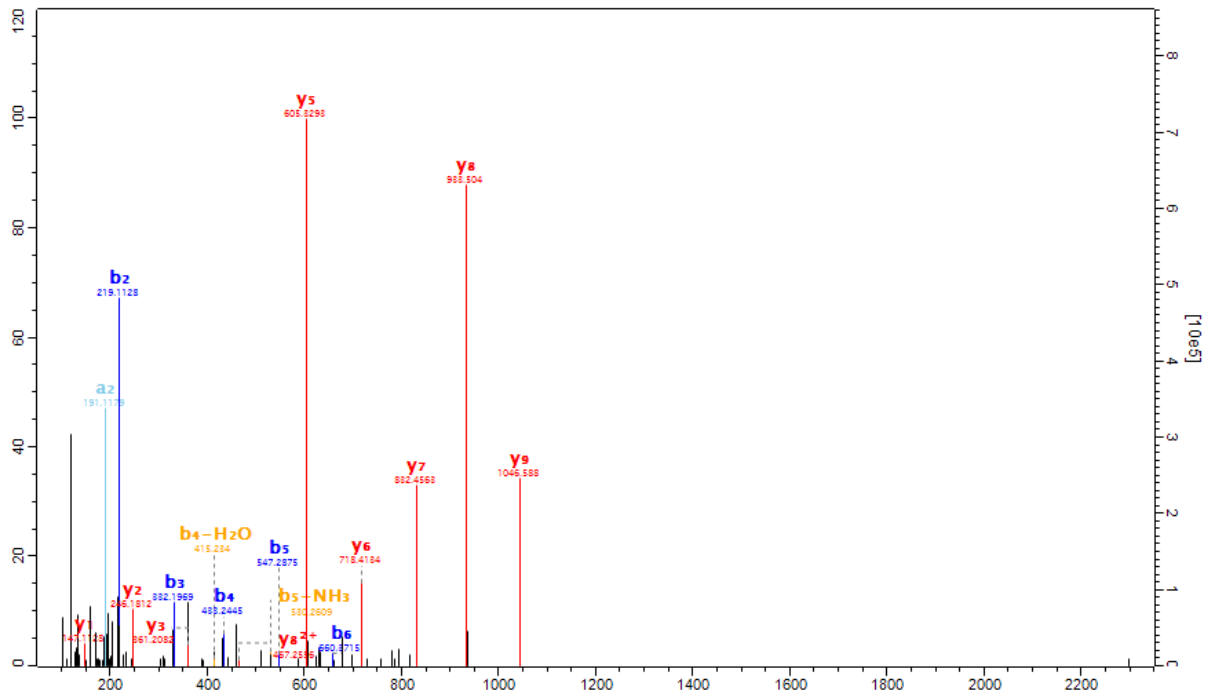

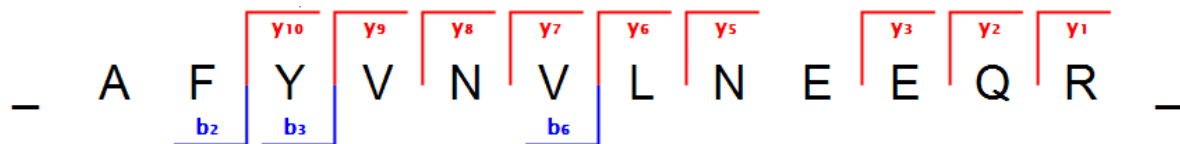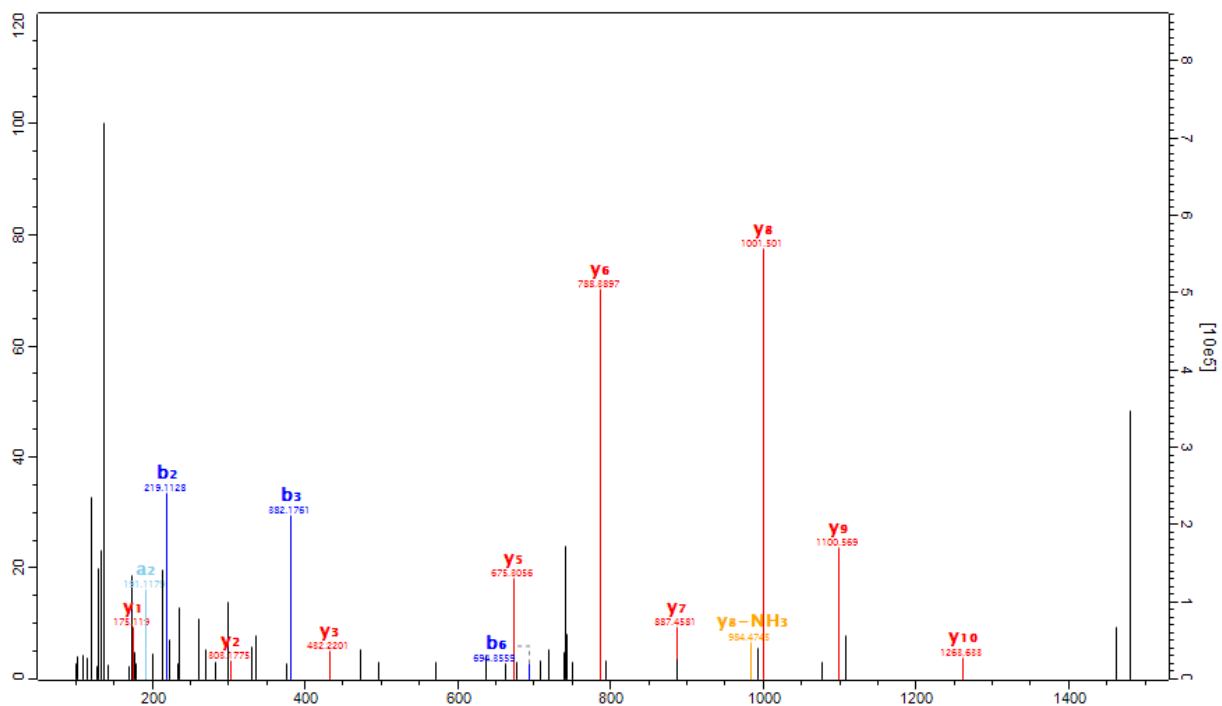

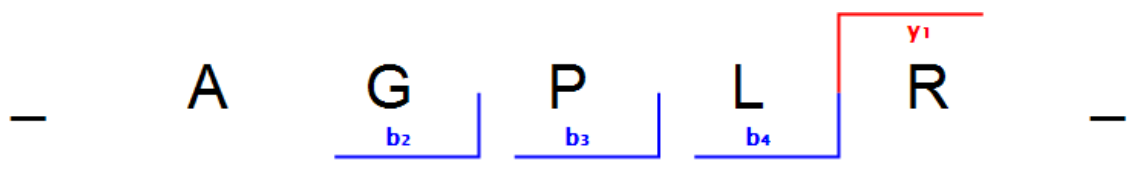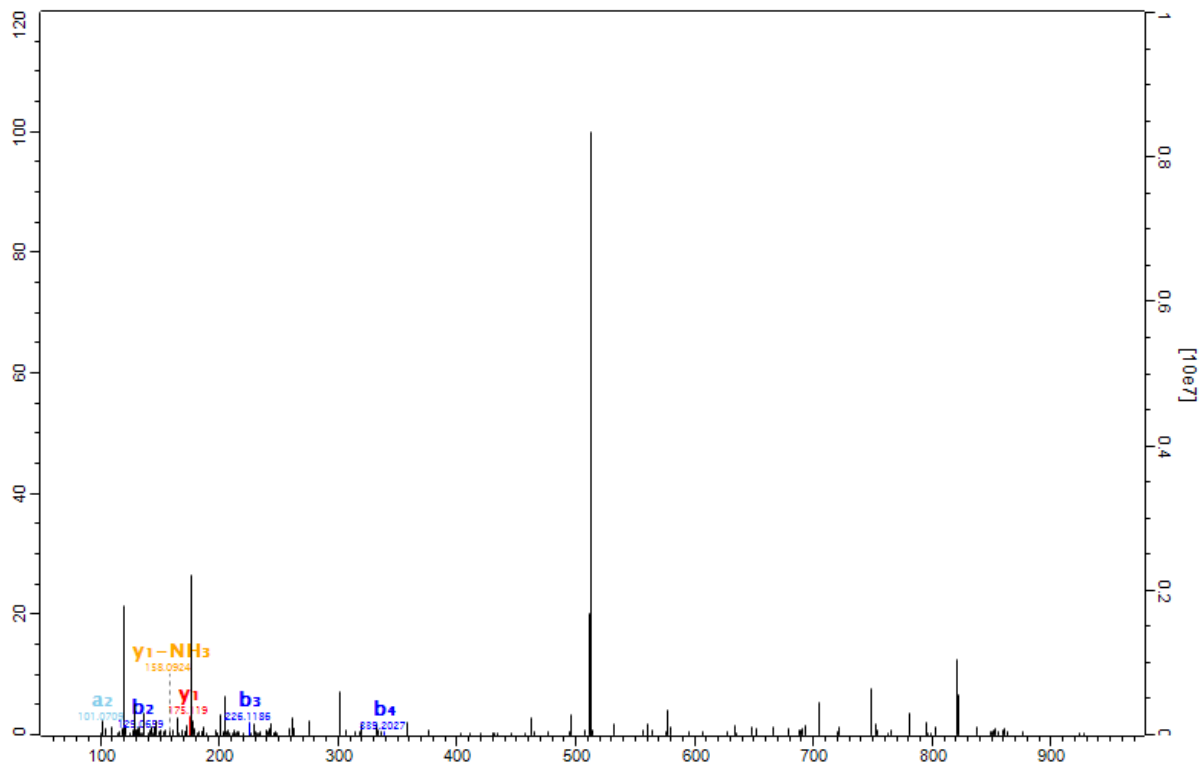



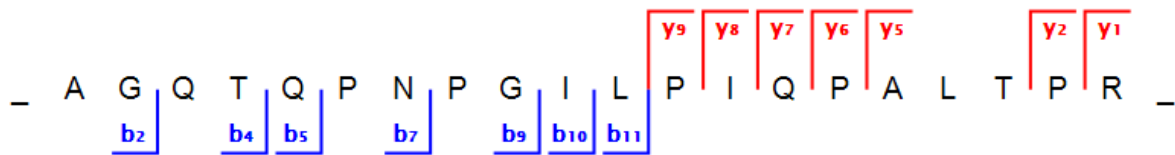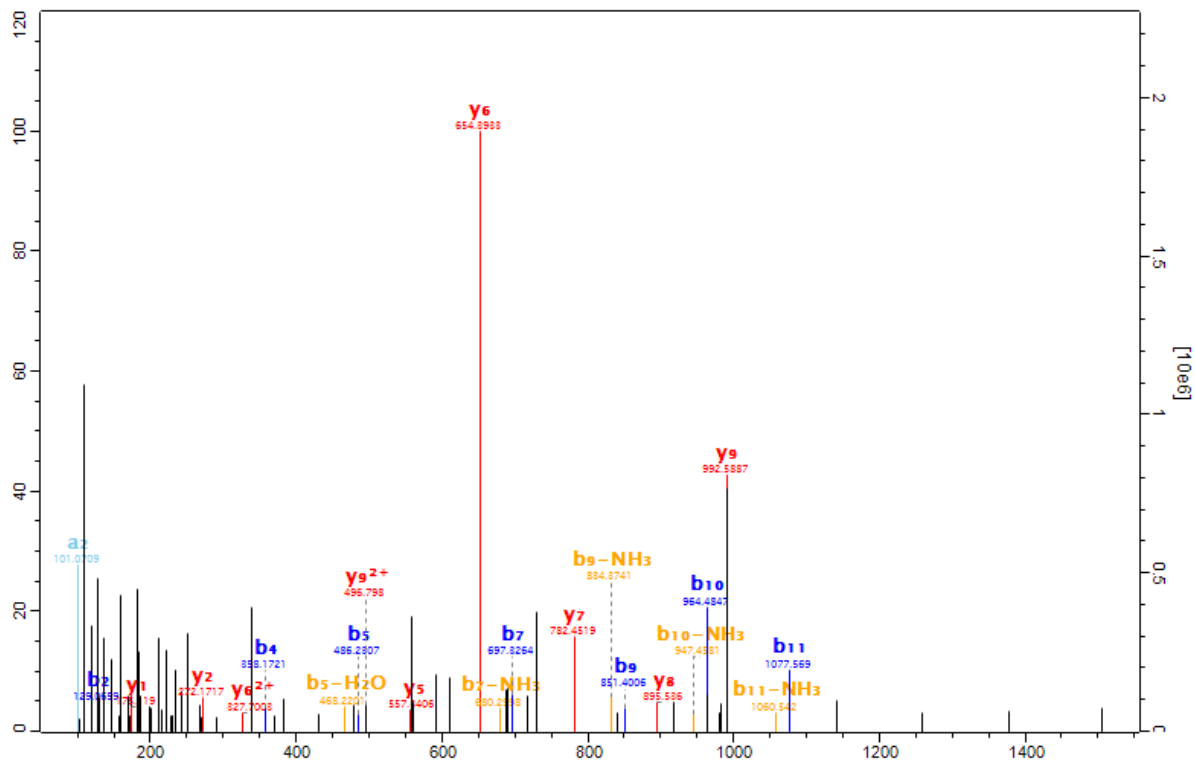

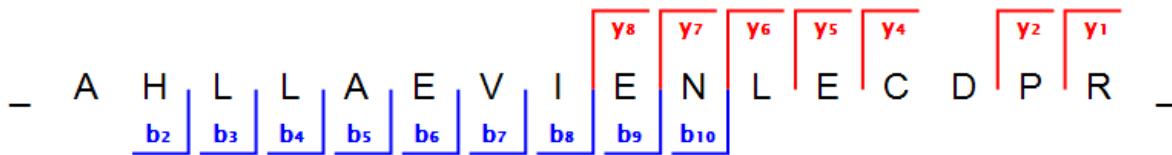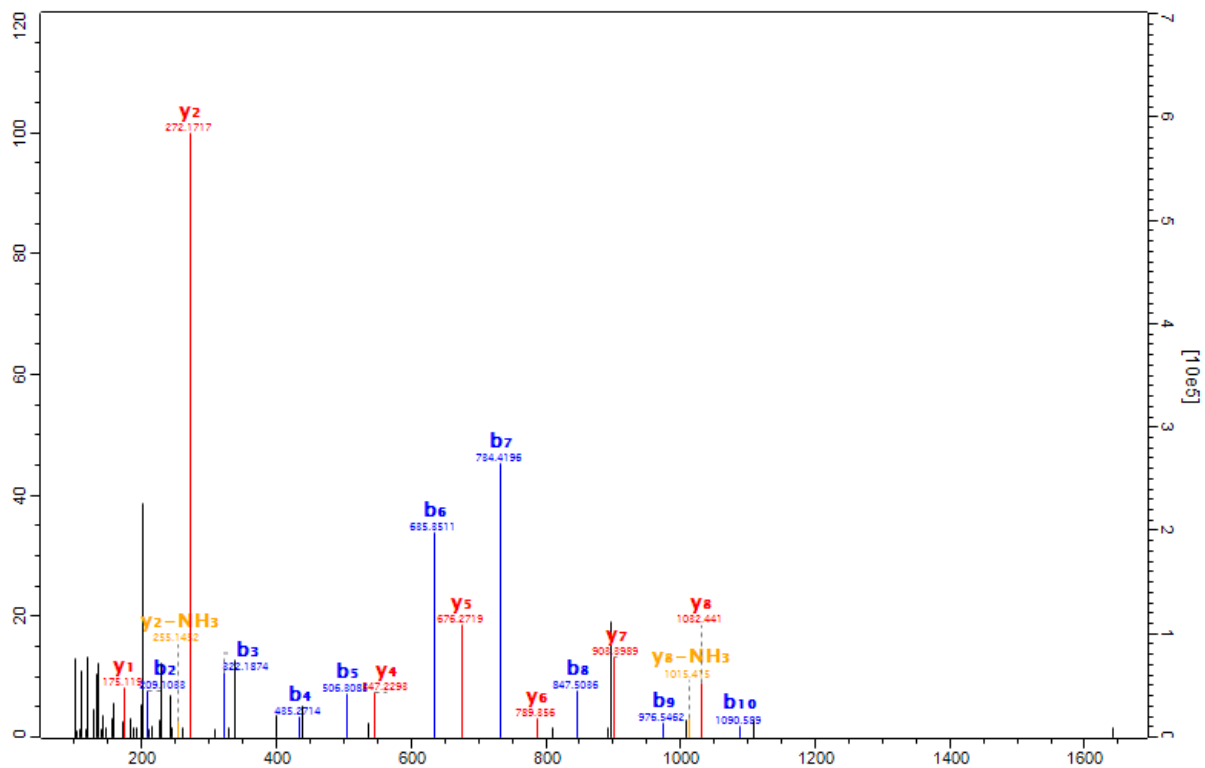

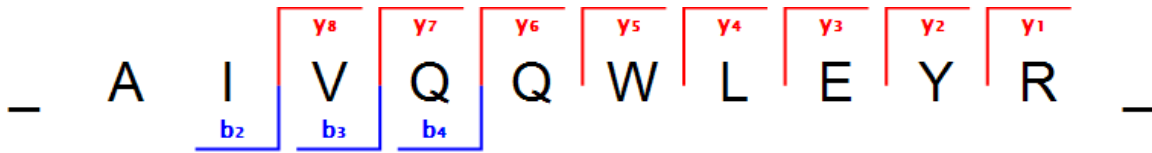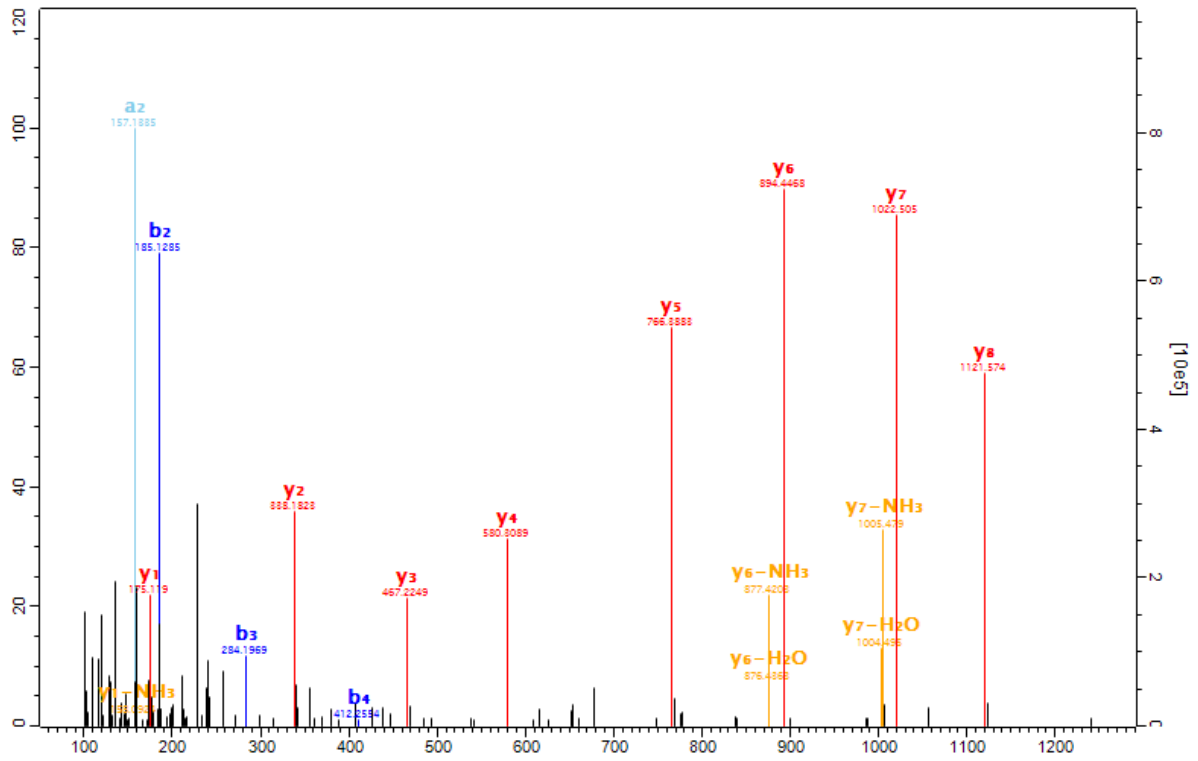

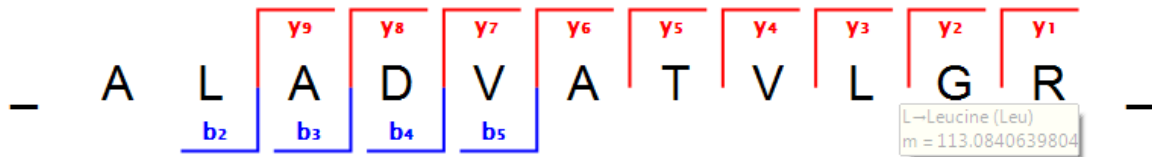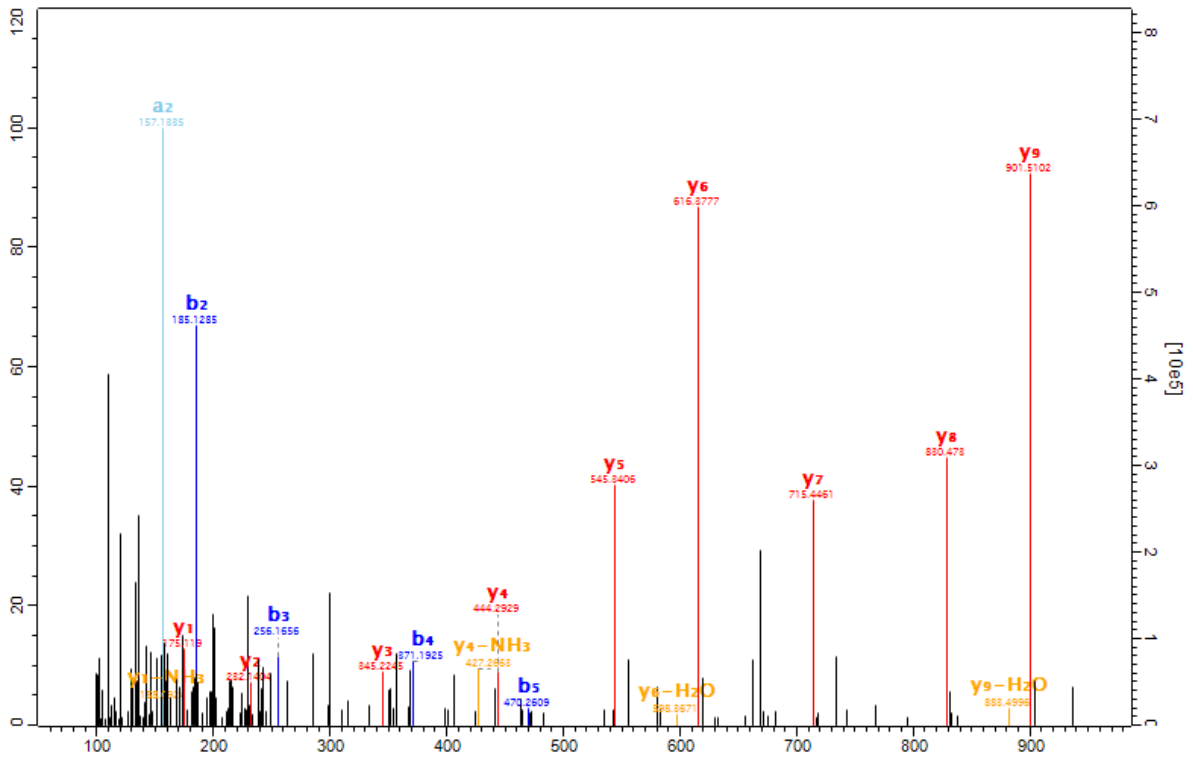

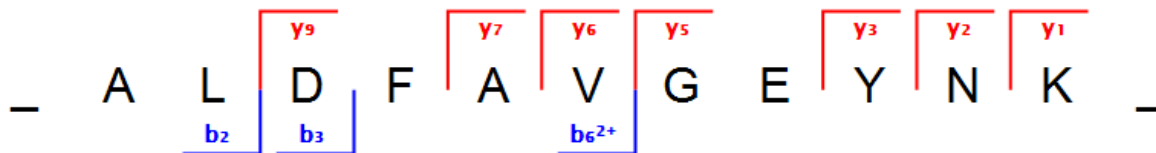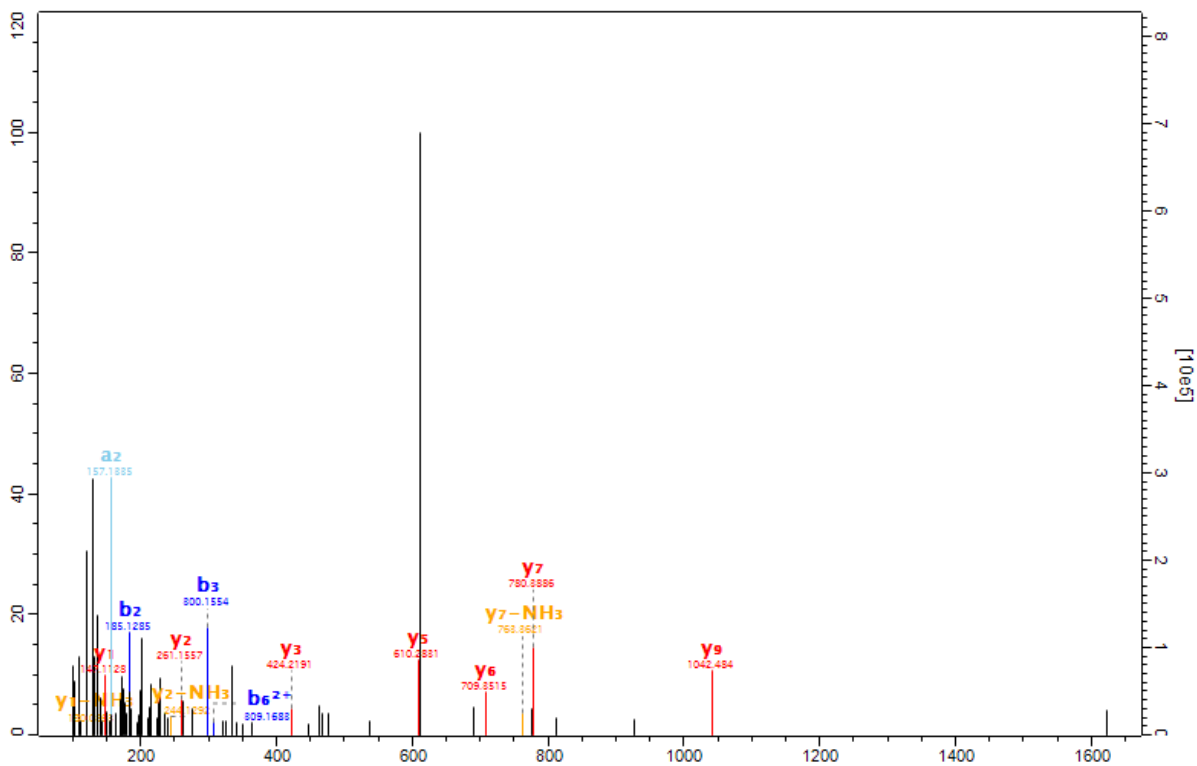

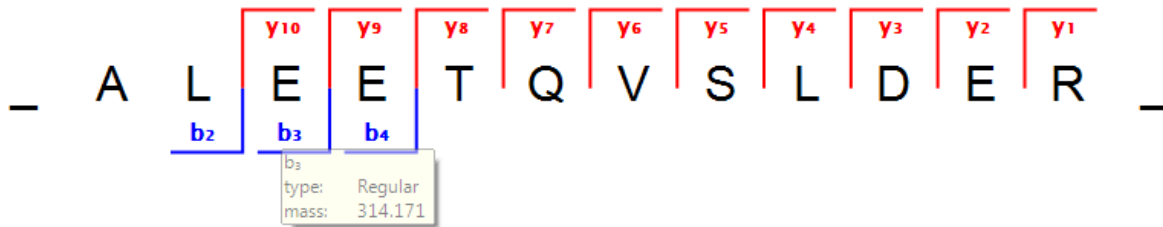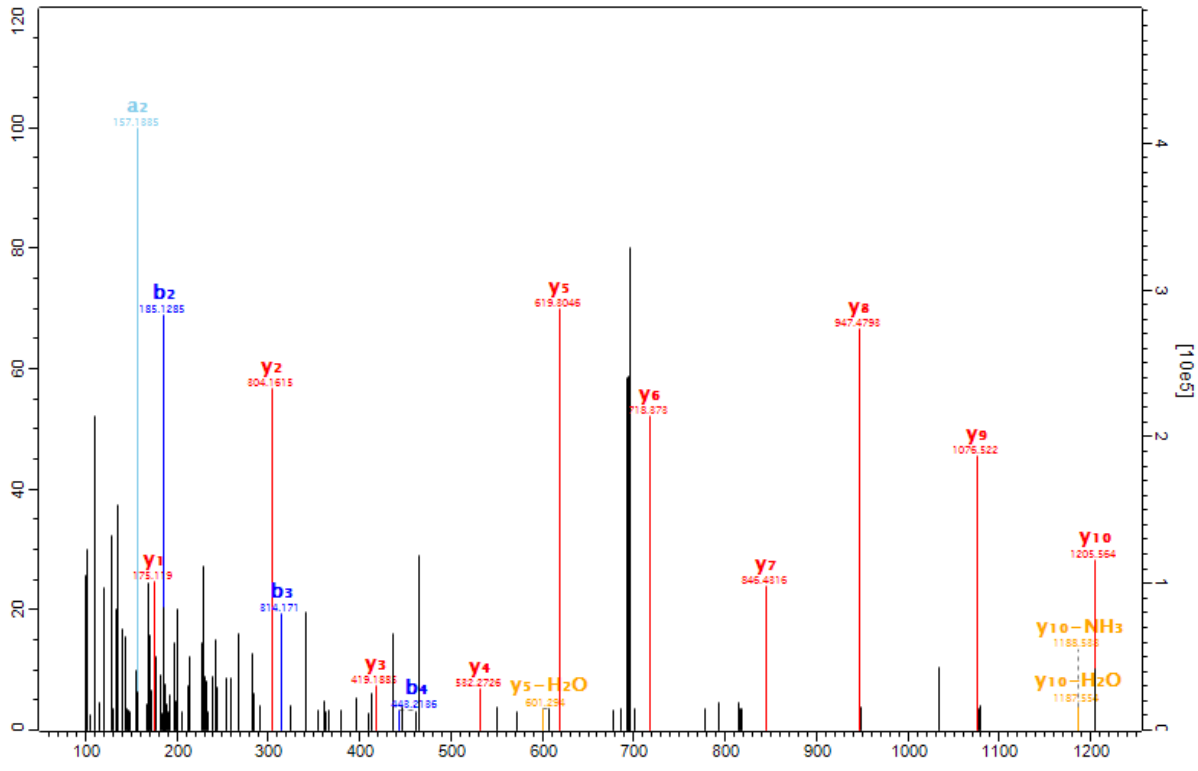

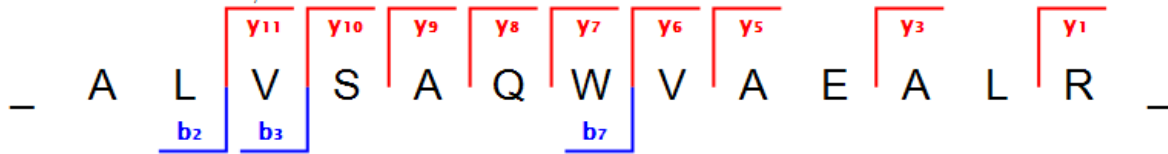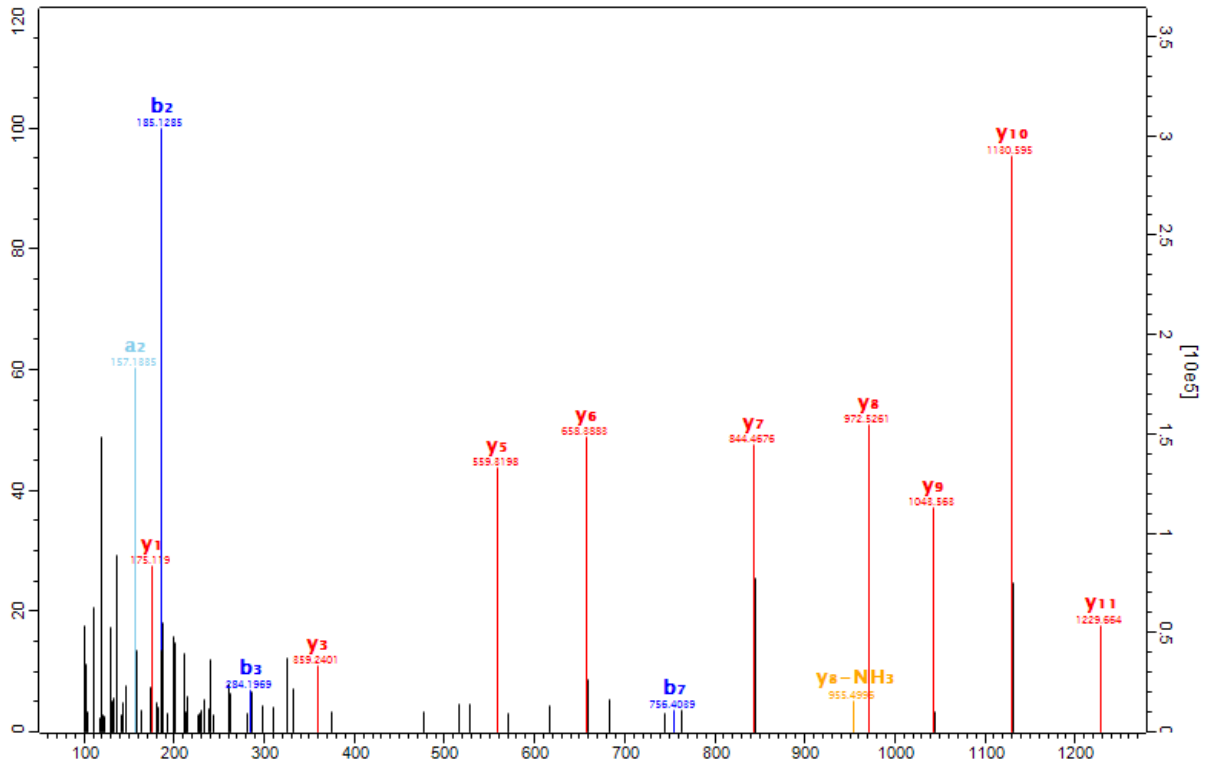

y18<sup>2+</sup>
b2
b3
b4
b5
b6
b7
y13
y12
y11
y10
y6
y4

A P V G S V V S V P S Q S S A S S D K

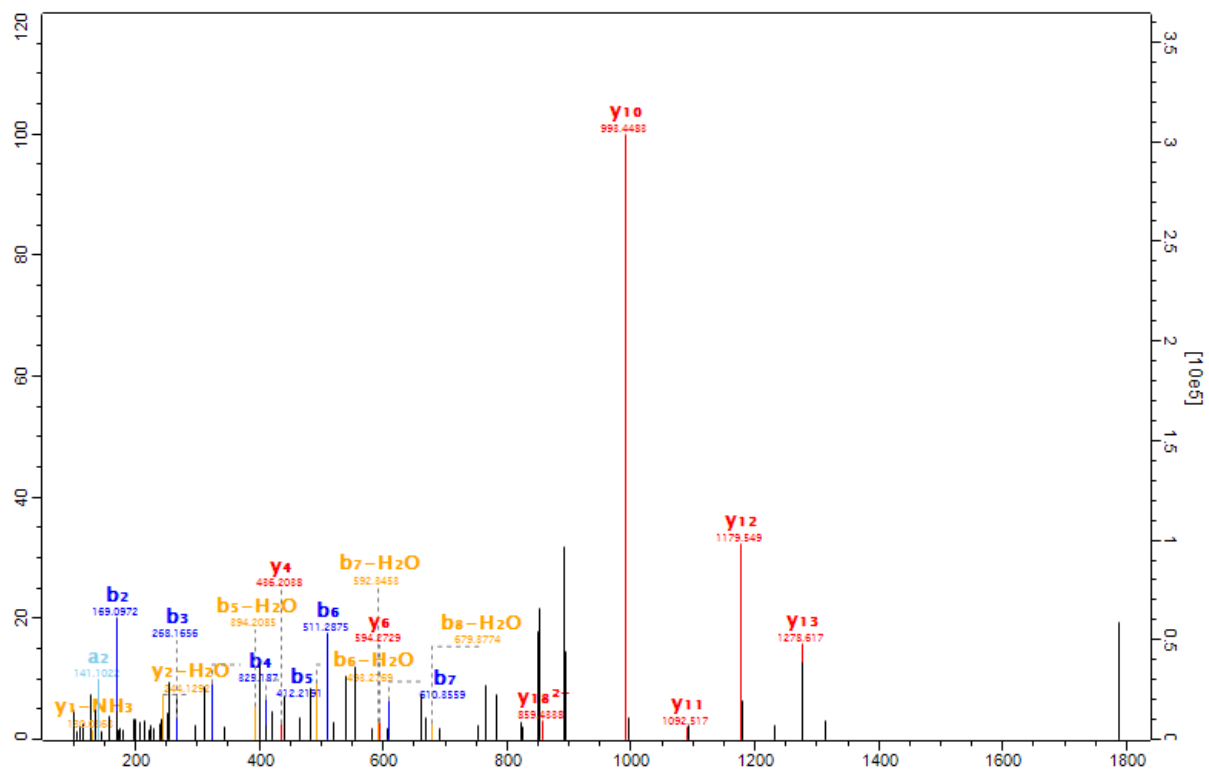



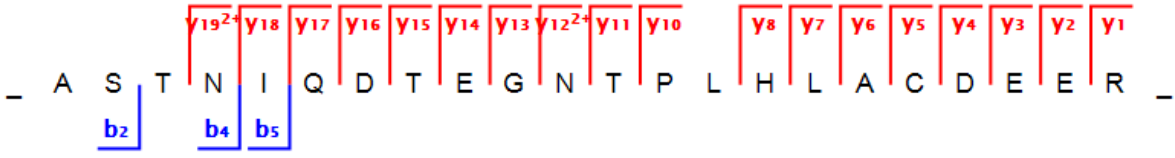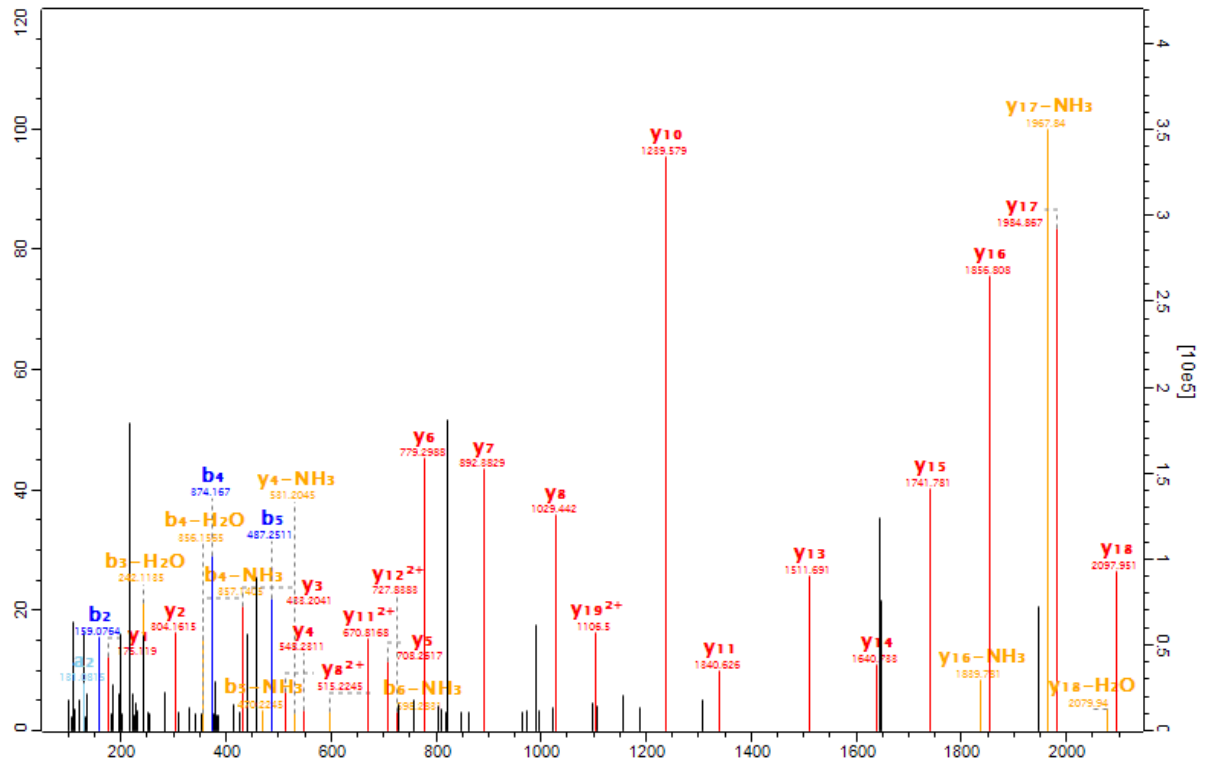

- A V S D A S A G D Y G S A I E T L V T A I S L I K -  
b2 b5 b6 b7 b9 b13 y11 y10 y9 y8 y7 y6 y5 y4 y3 y2 y1

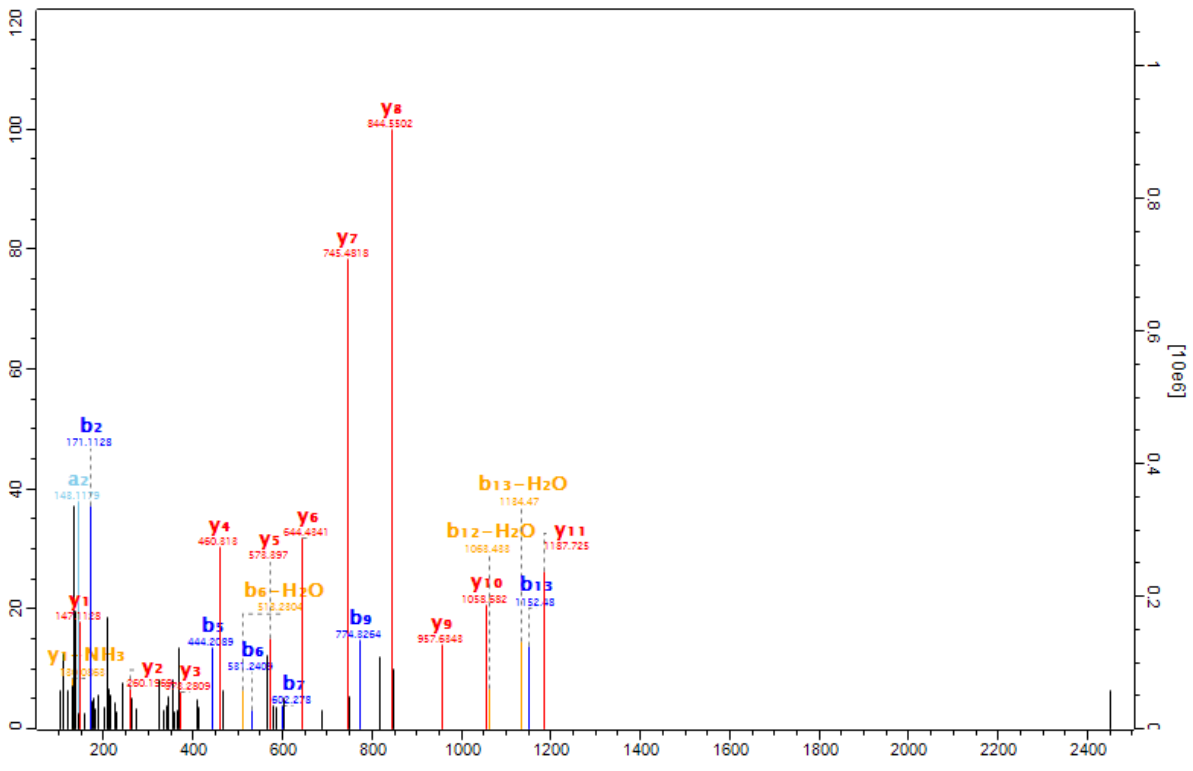

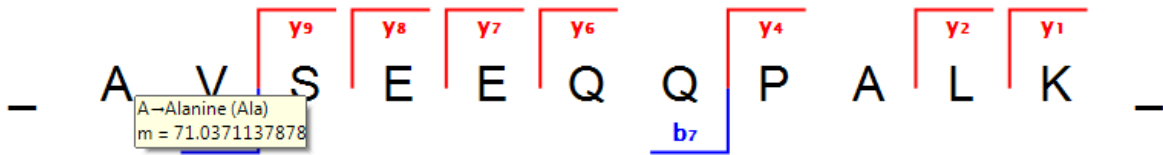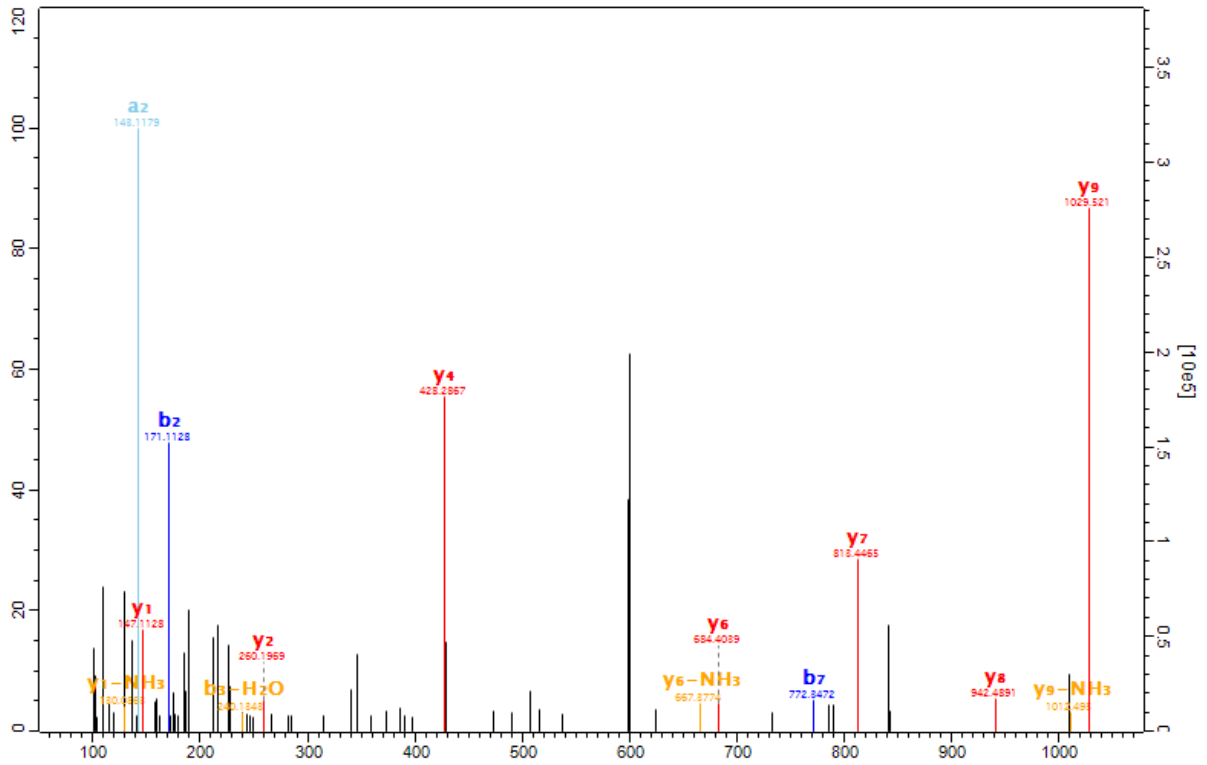

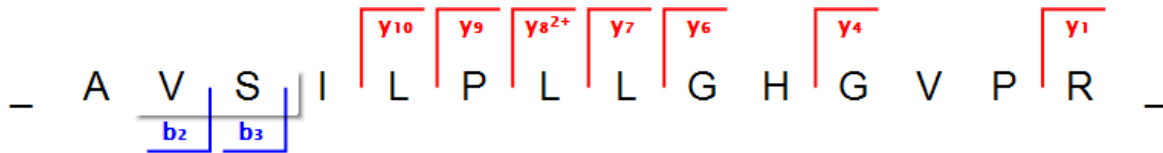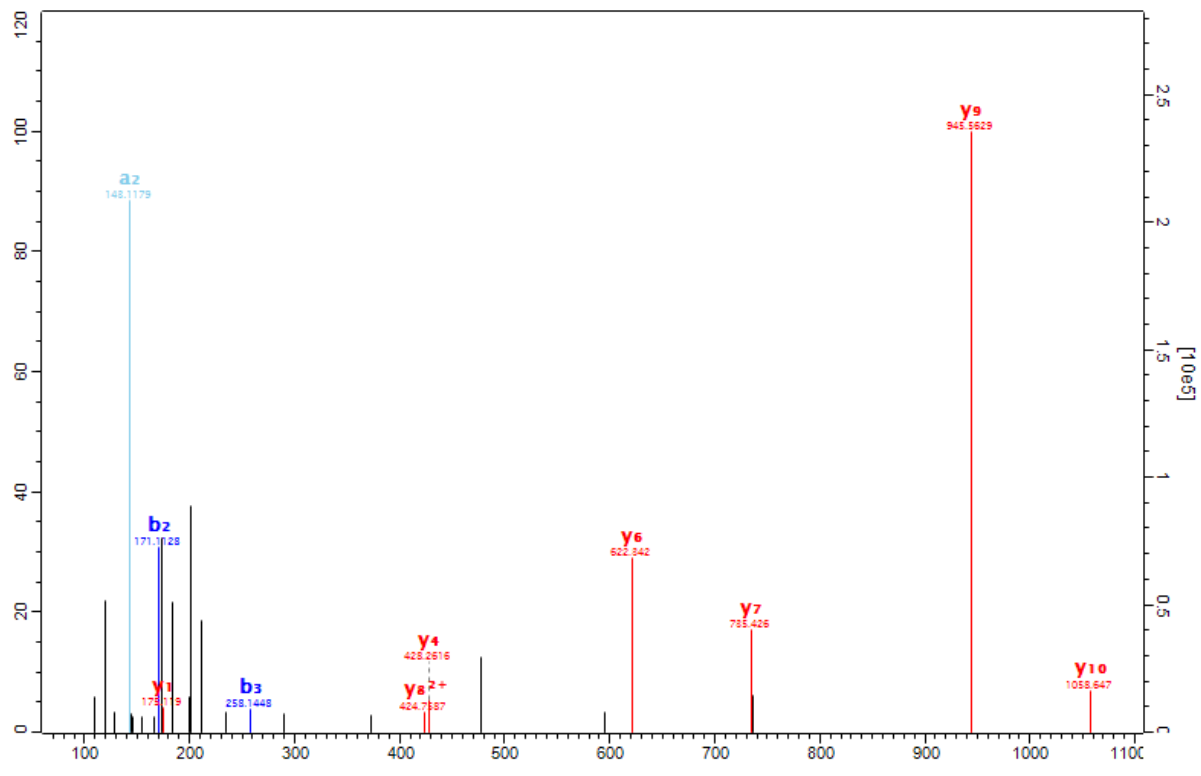

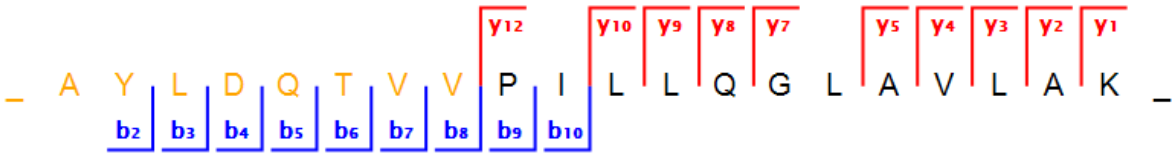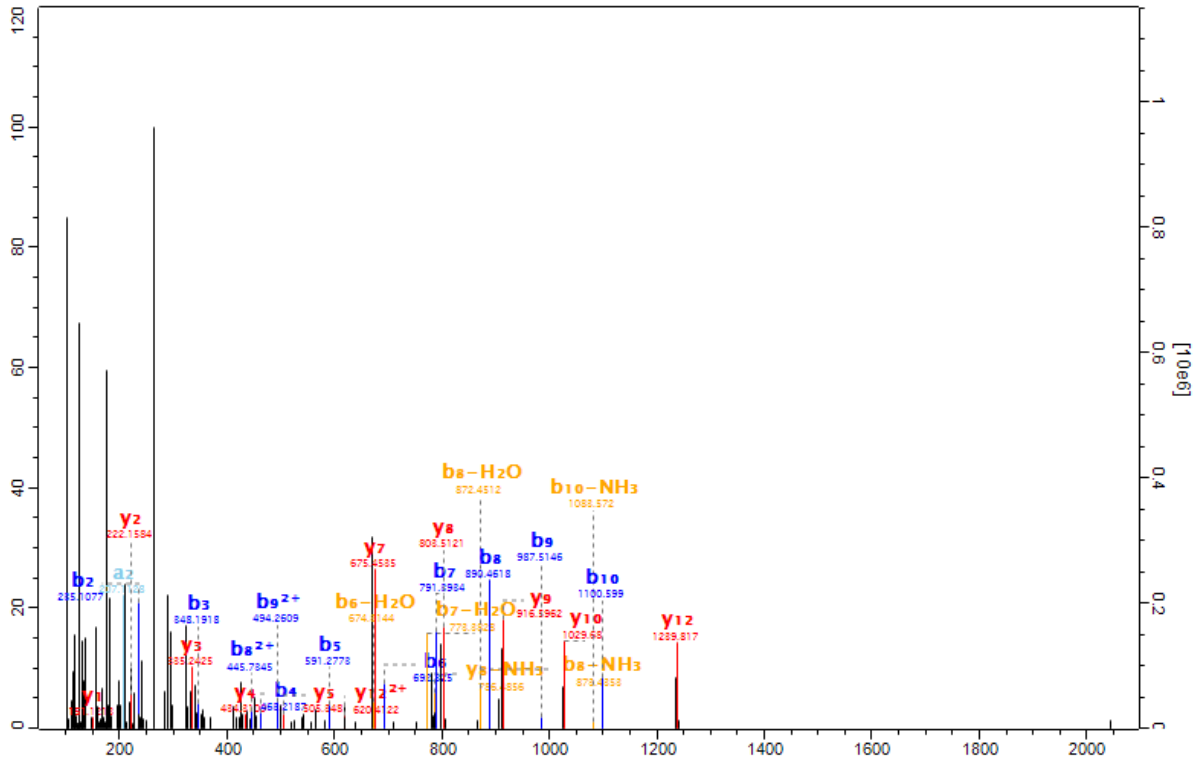

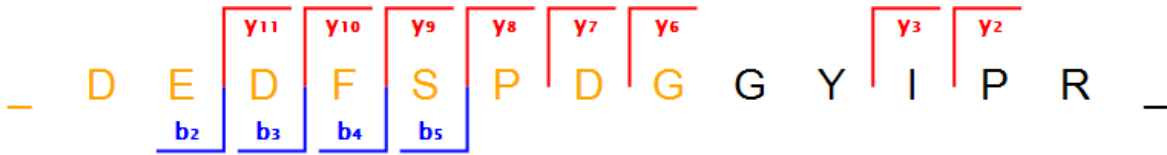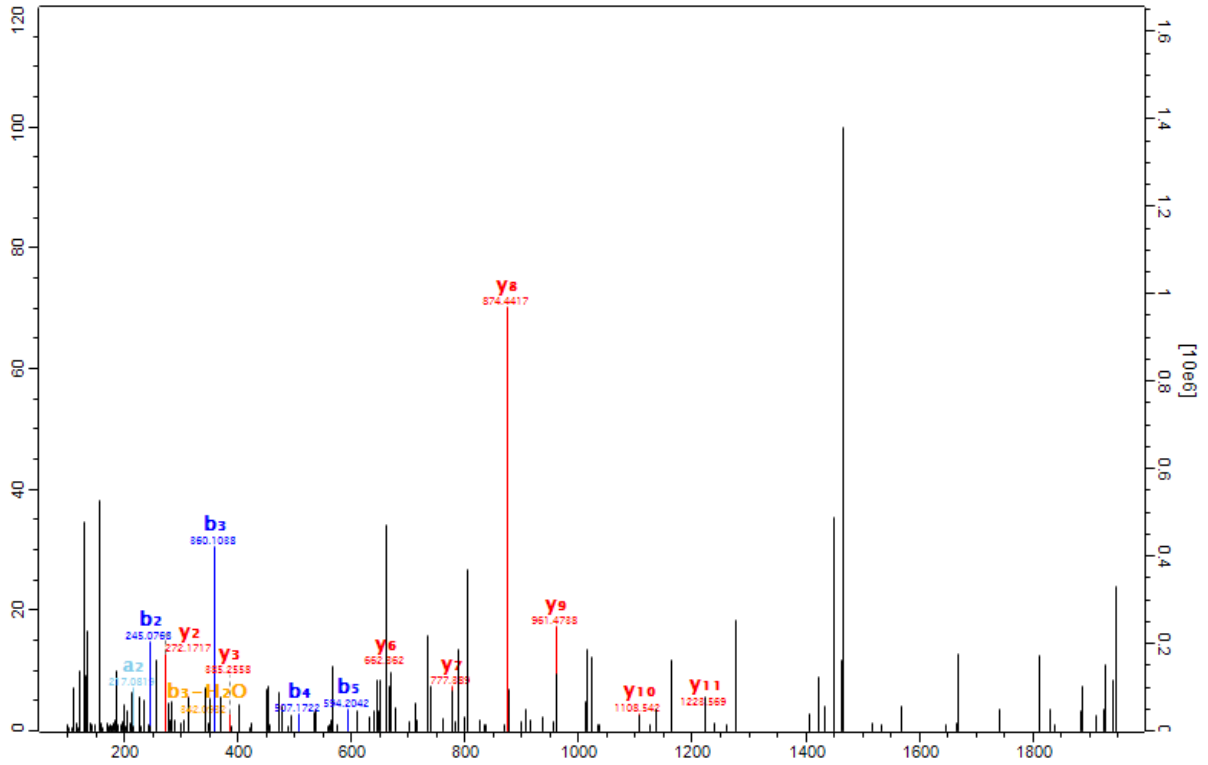

- D I P T N S P E L E E T L T H T I T K -  
b<sub>2</sub> y<sub>17</sub> y<sub>16</sub> y<sub>15</sub> y<sub>14</sub> y<sub>13</sub> y<sub>11</sub> y<sub>10</sub> y<sub>9</sub> y<sub>7</sub> y<sub>6</sub> y<sub>5</sub> y<sub>4</sub> y<sub>2</sub> y<sub>1</sub>  
b<sub>9</sub><sup>2+</sup>

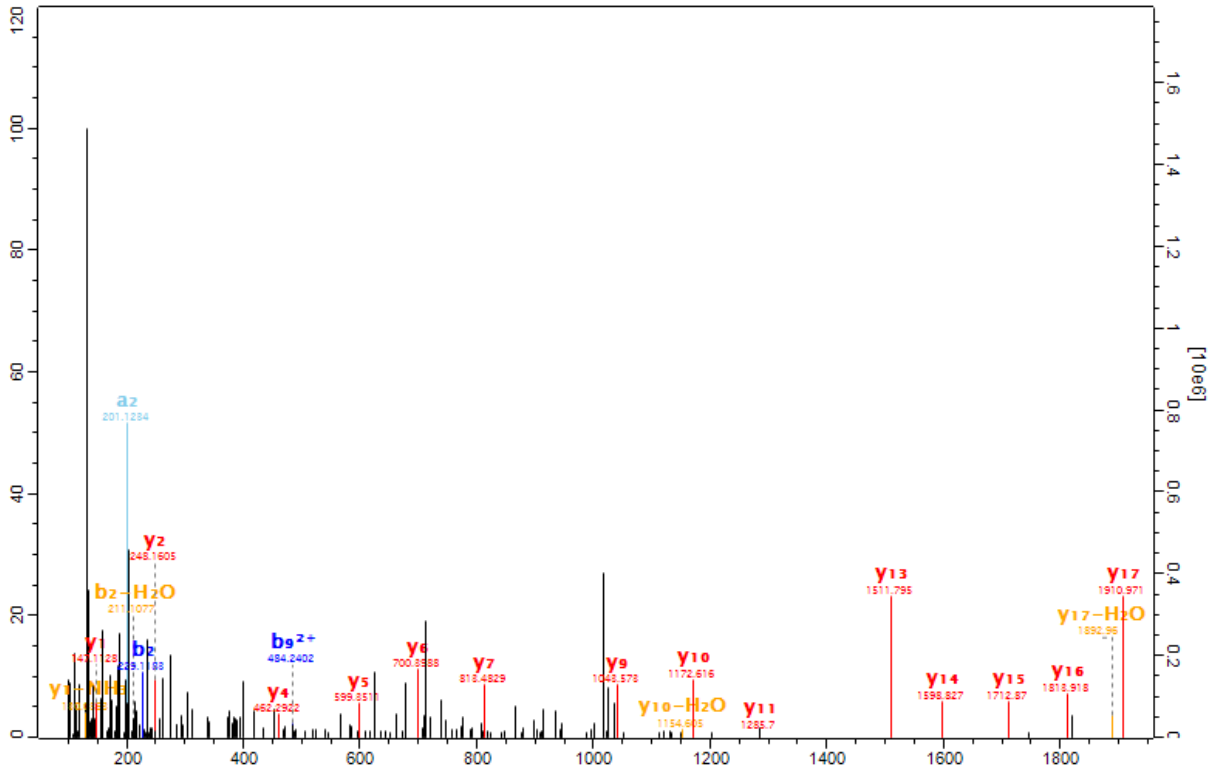

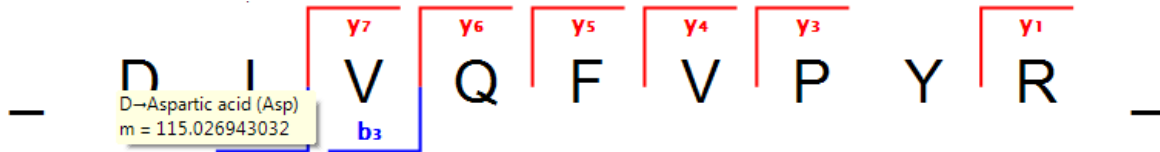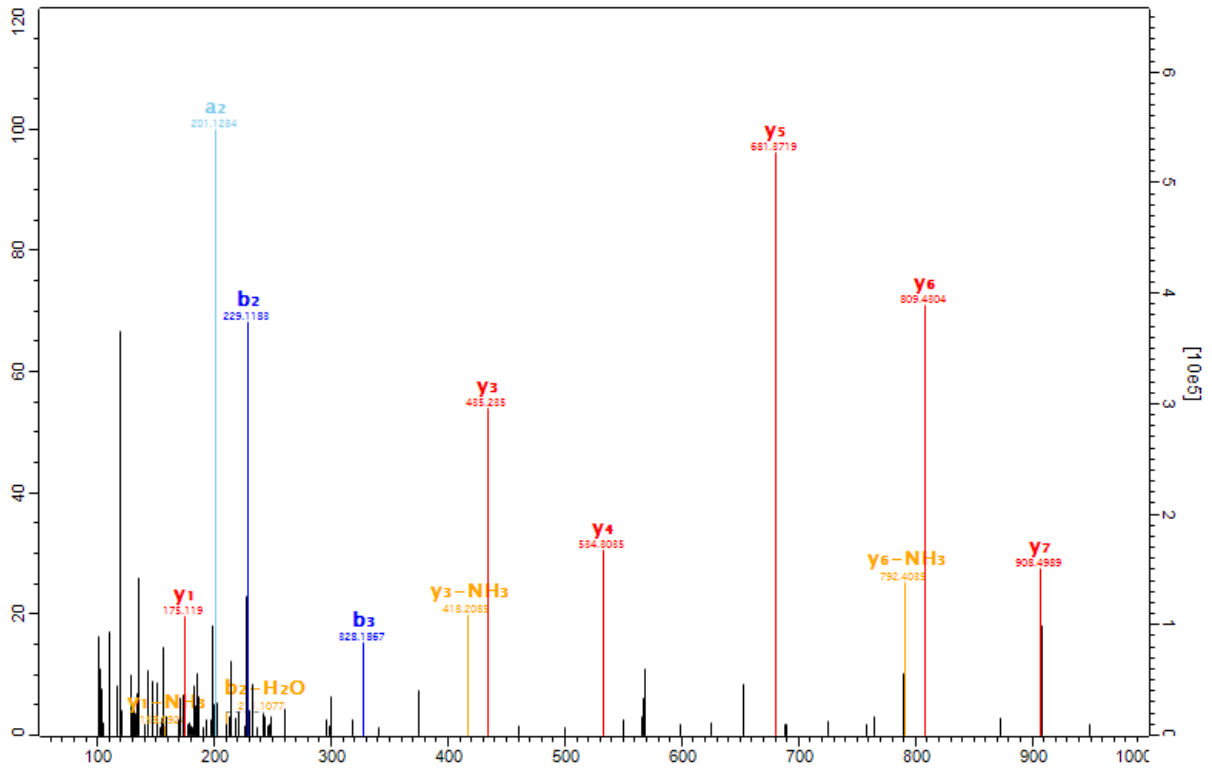



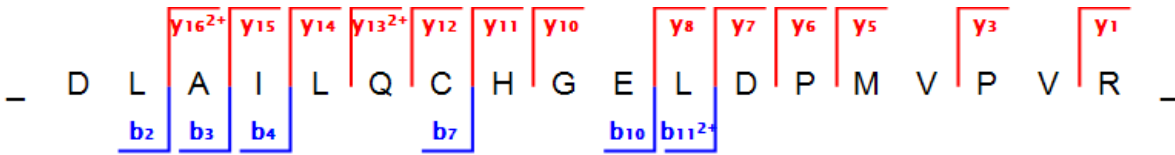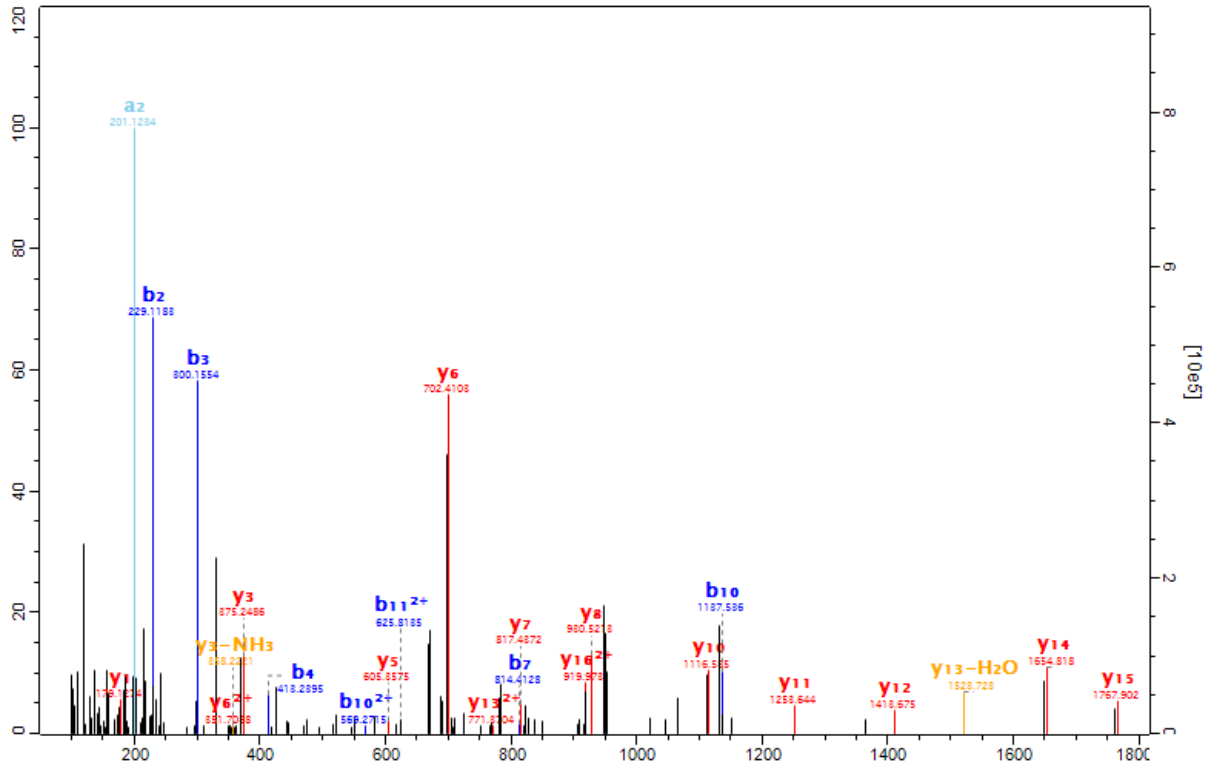

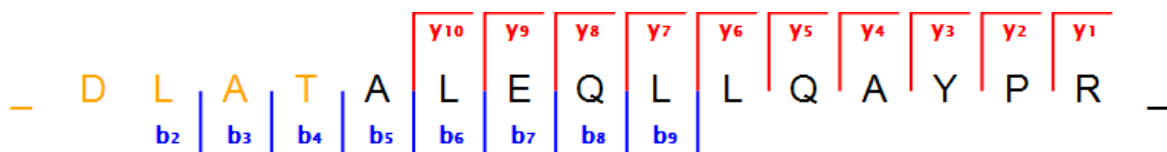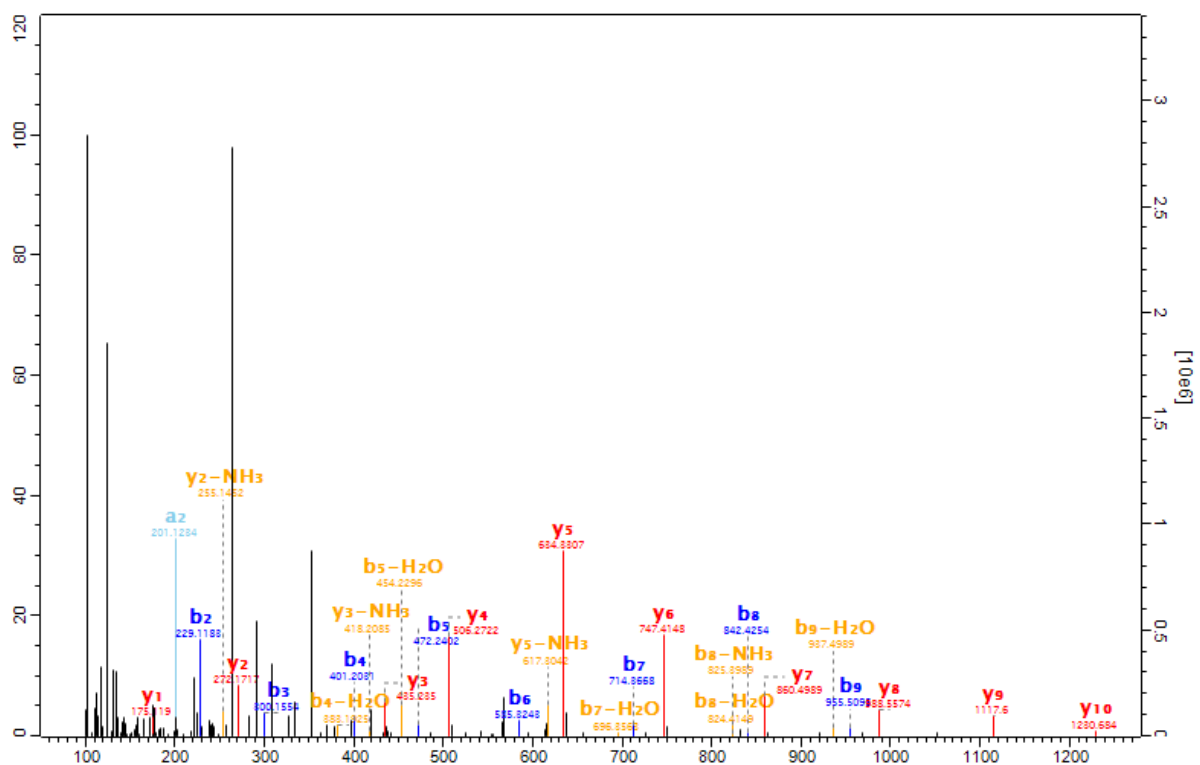

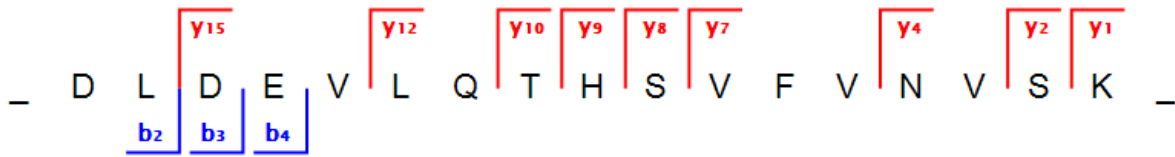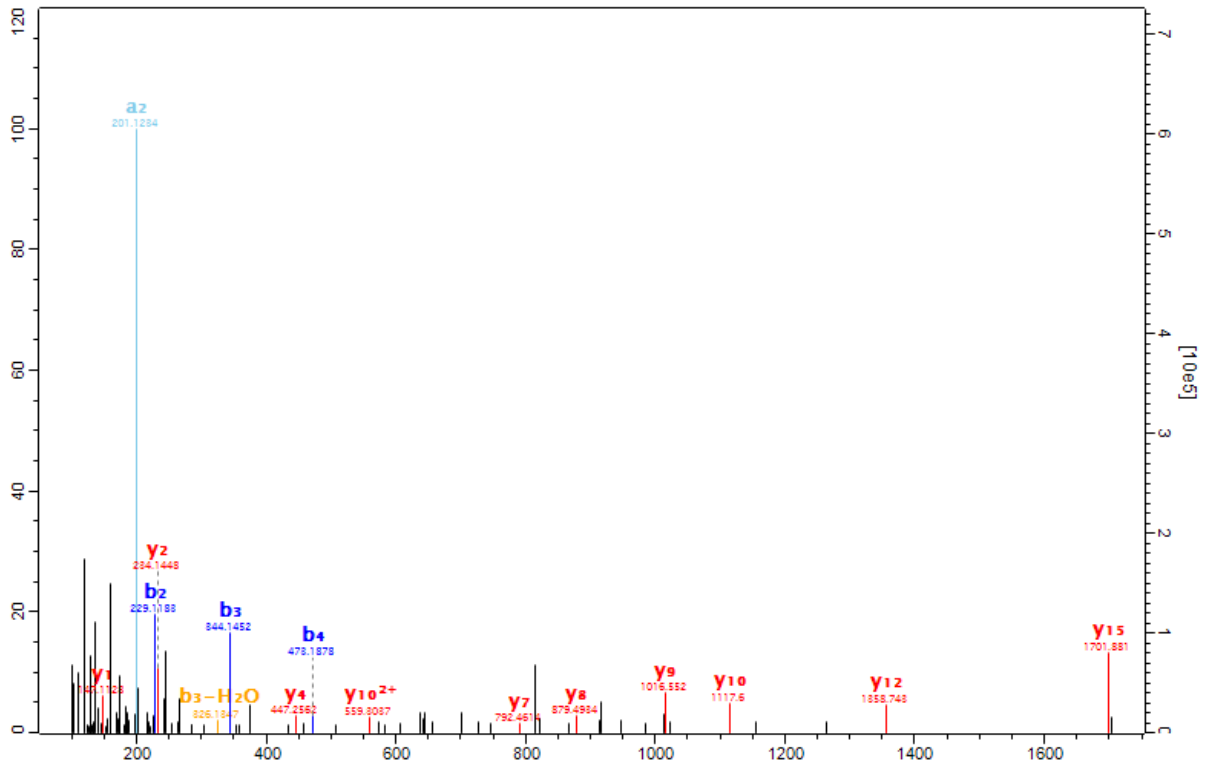

- D L E K P F L L P V E A V Y S V P G R -  
b<sub>2</sub> b<sub>7</sub> b<sub>8</sub> b<sub>9</sub><sup>2+</sup> y<sub>11</sub> y<sub>9</sub> y<sub>8</sub> y<sub>7</sub> y<sub>6</sub> y<sub>5</sub> y<sub>4</sub> y<sub>3</sub> y<sub>1</sub>

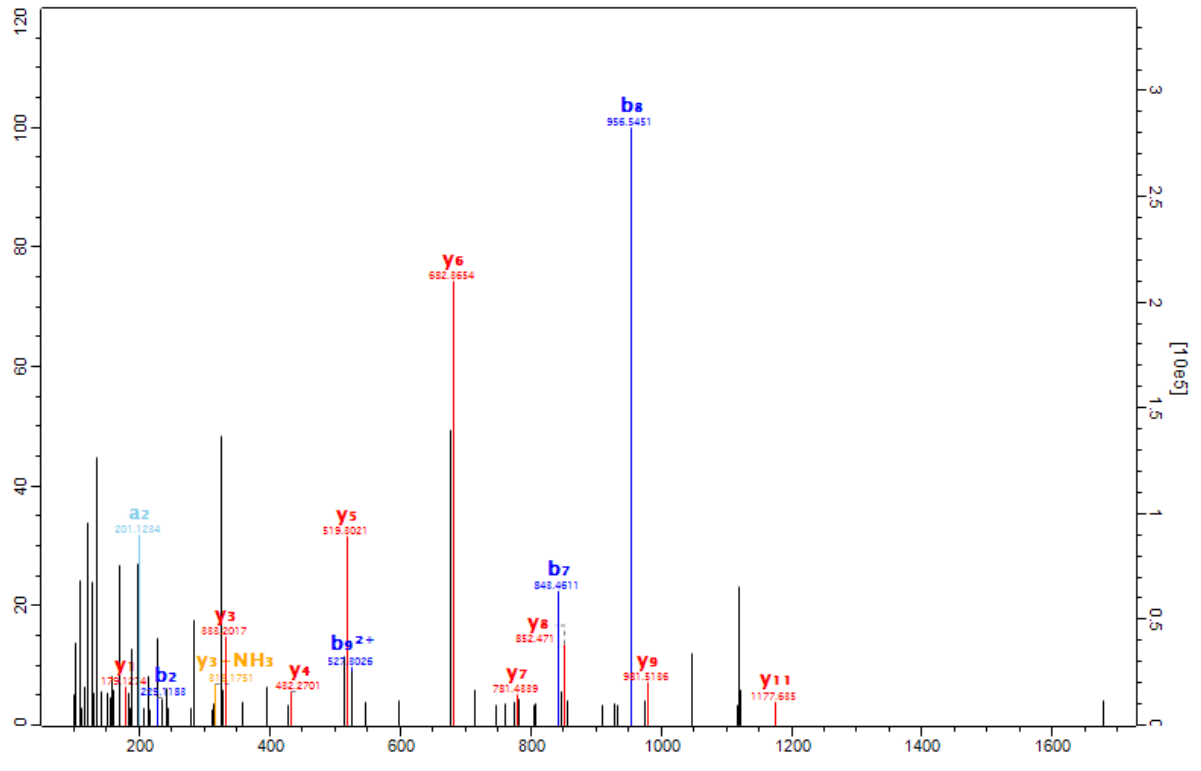

- D L P T I P G V T S P S S D E P P M E A S Q S H L R -  
 b2 b3 b4 b5 y21 y20<sup>2+</sup> y18<sup>2+</sup> y17 y16 y12 y11 y10 y7 y6 y1

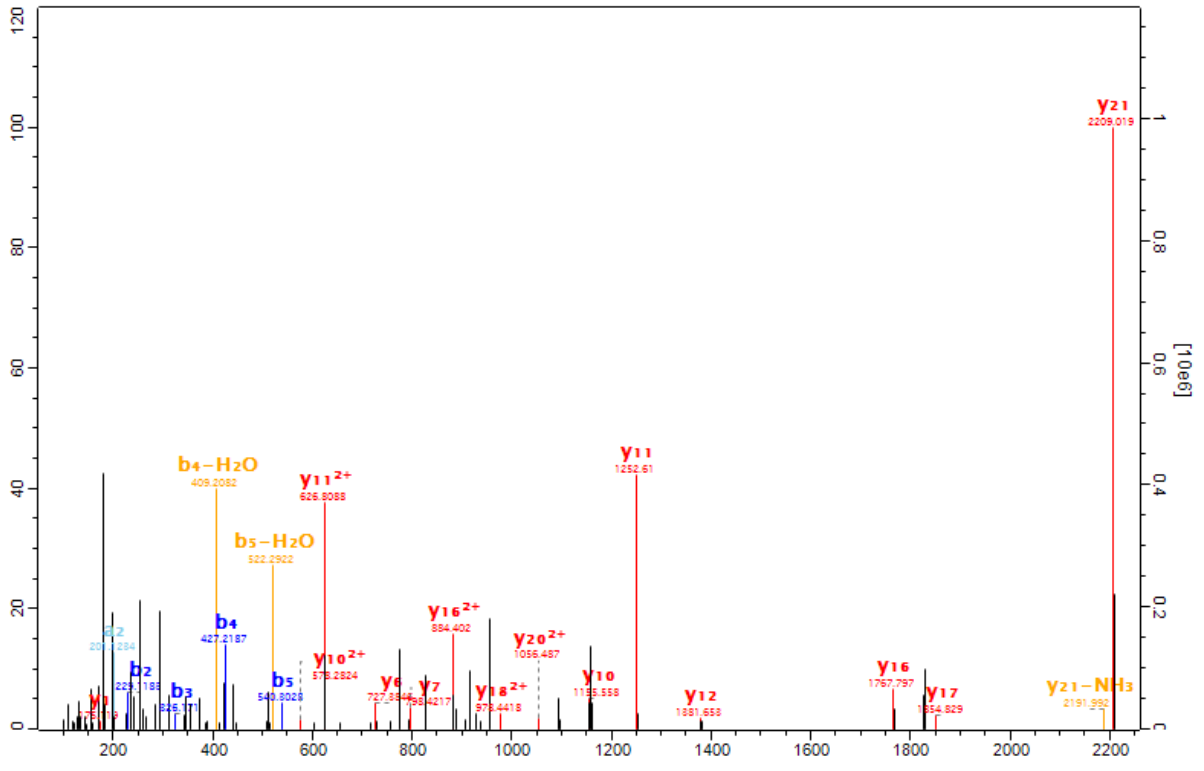

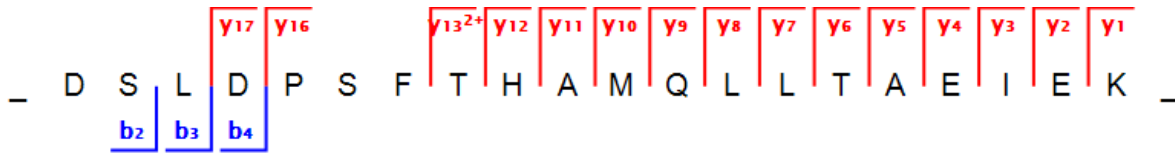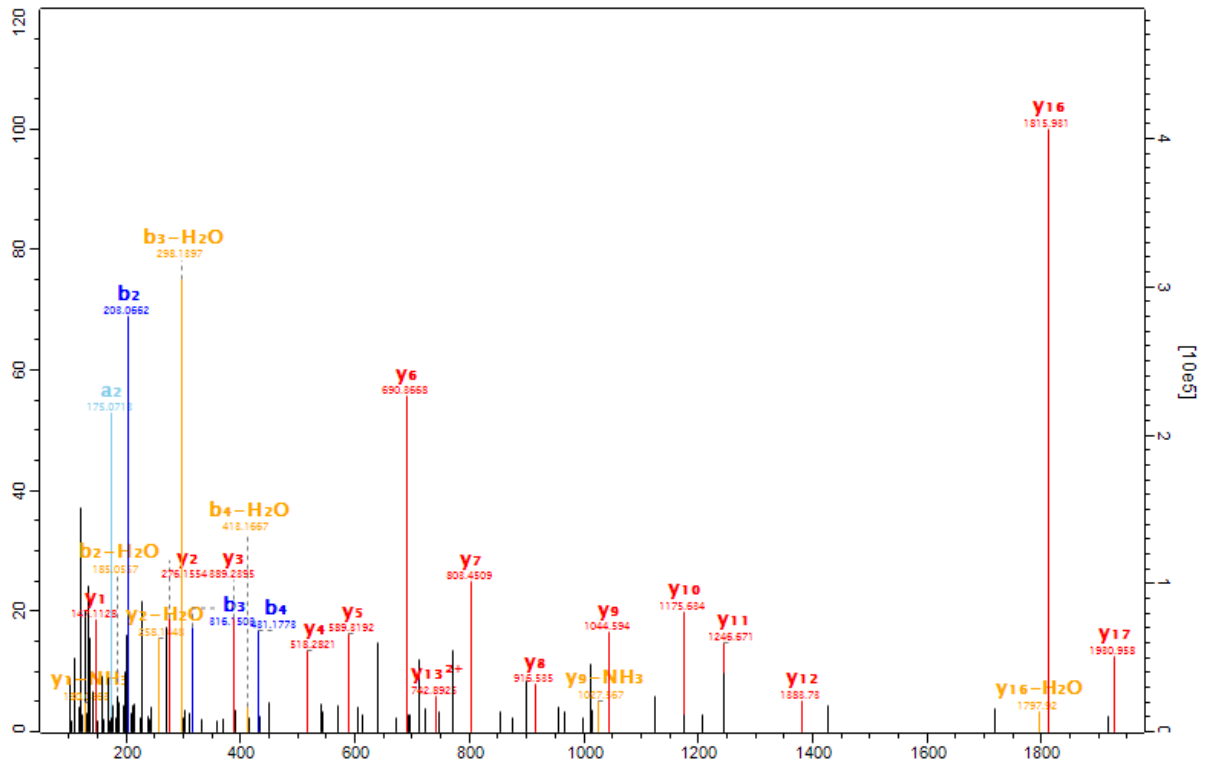

- D T F E H D P S E S I D E F N K -  
b<sub>2</sub>
b<sub>6</sub>
b<sub>8</sub>
b<sub>10</sub>
y<sub>7</sub>
y<sub>5</sub>
y<sub>3</sub>
y<sub>2</sub>
y<sub>1</sub>

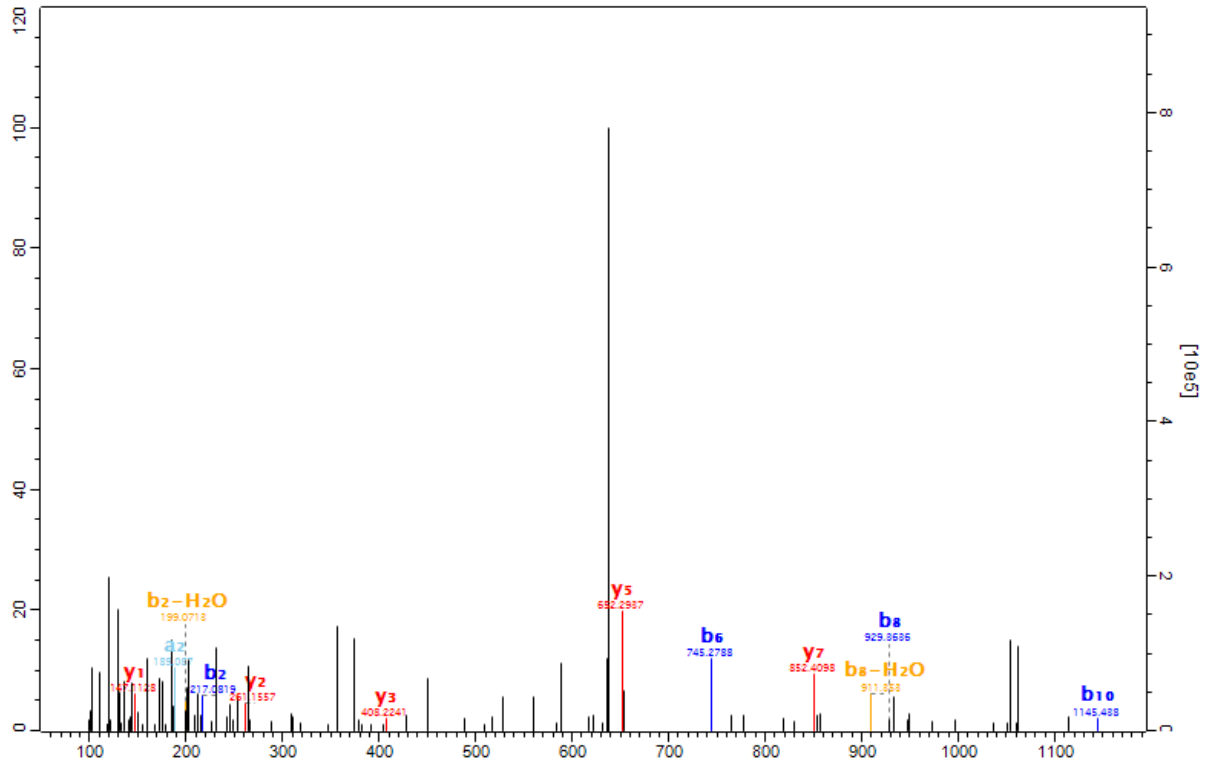

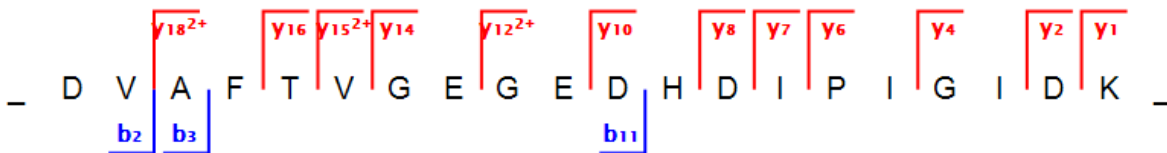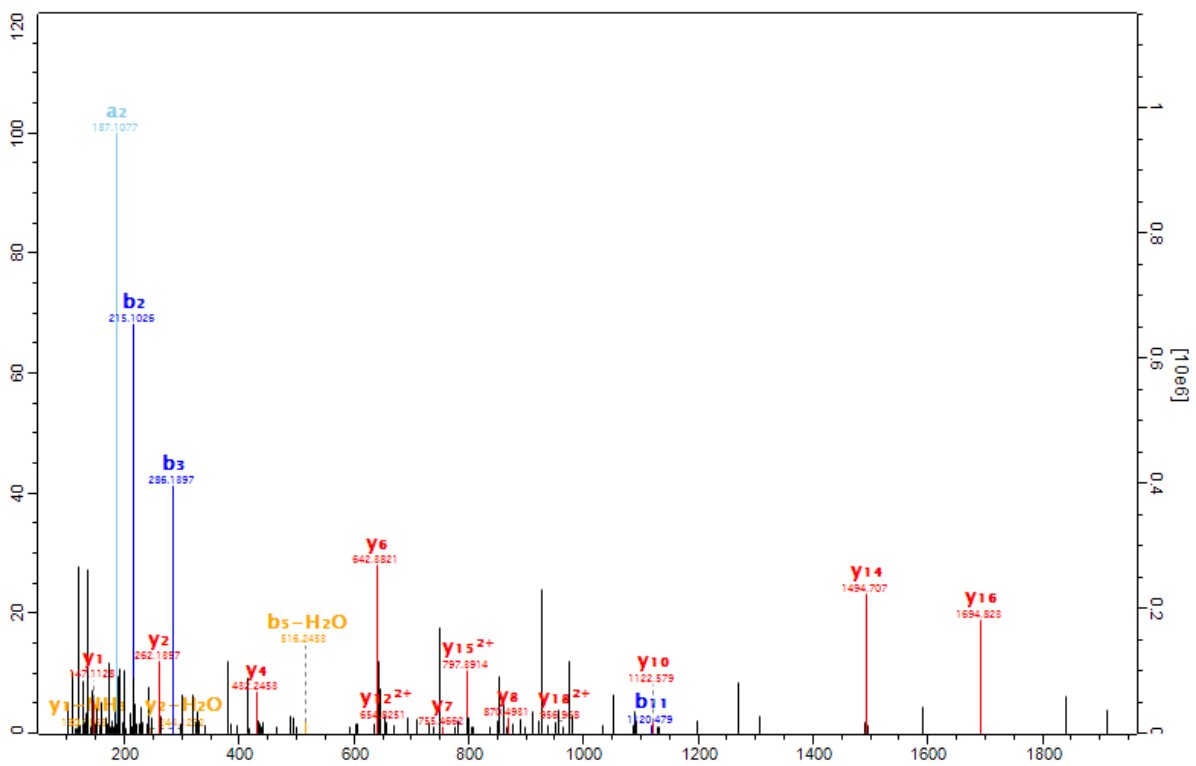



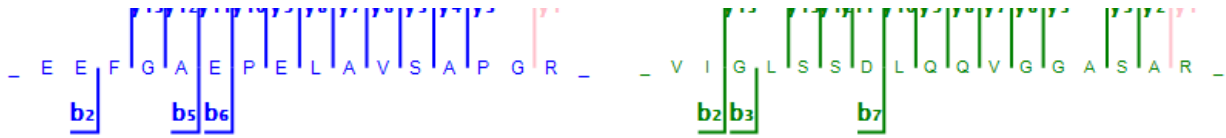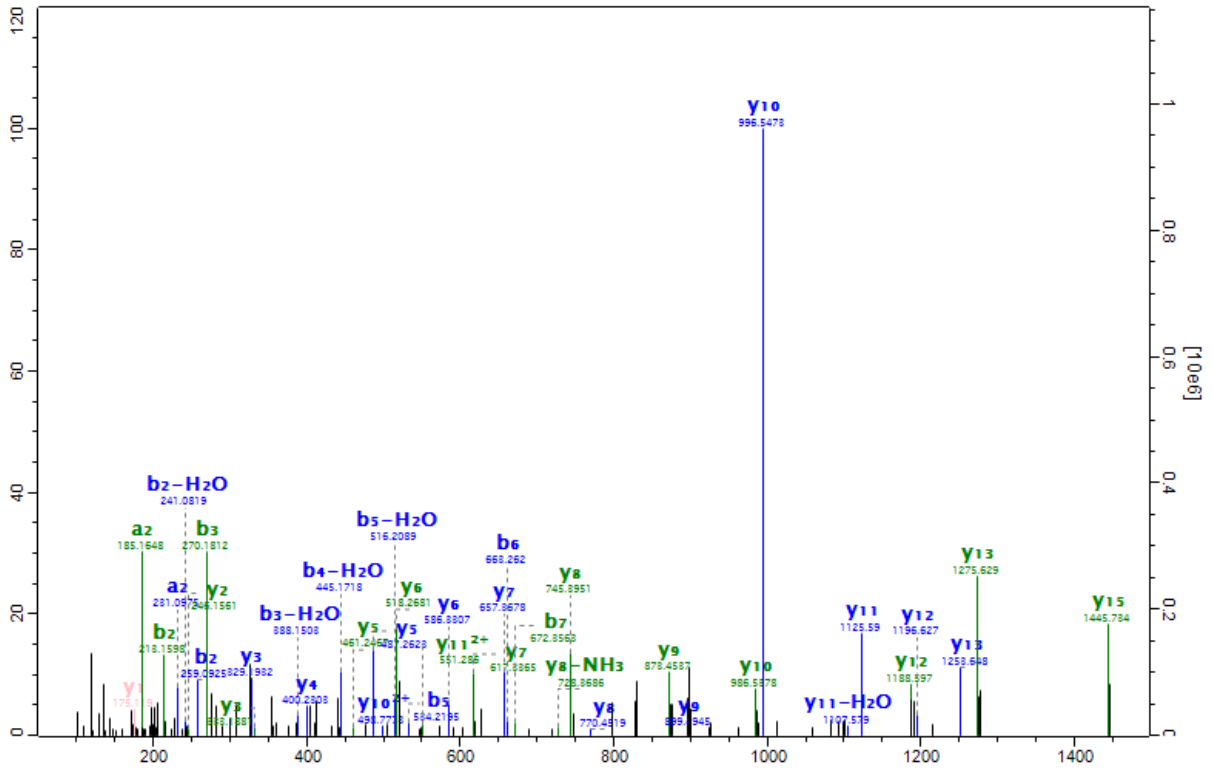

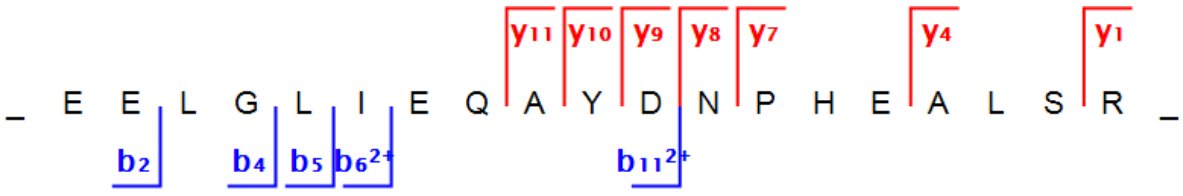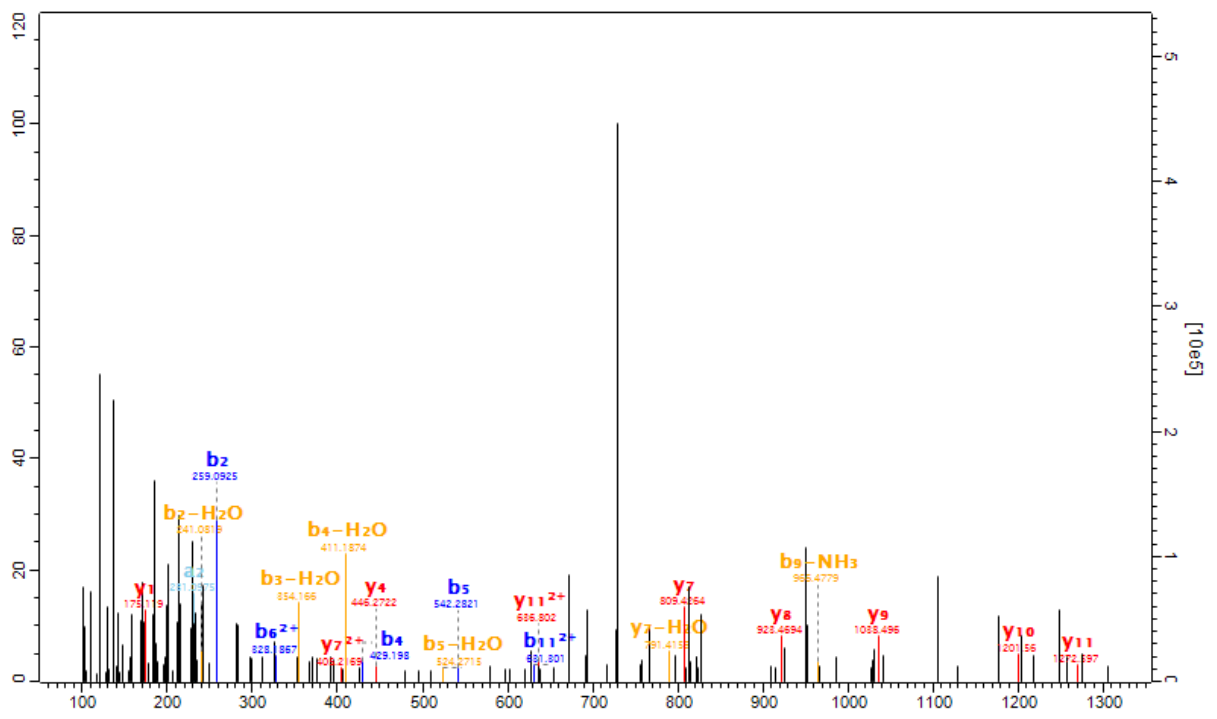

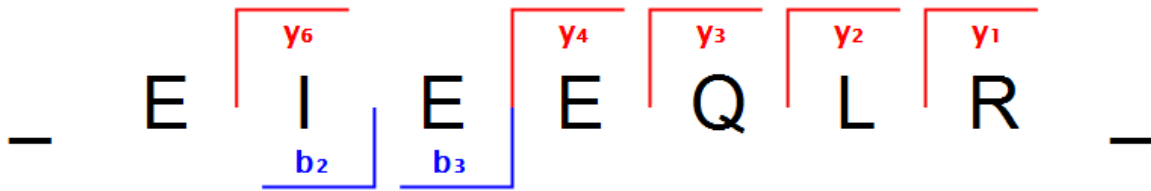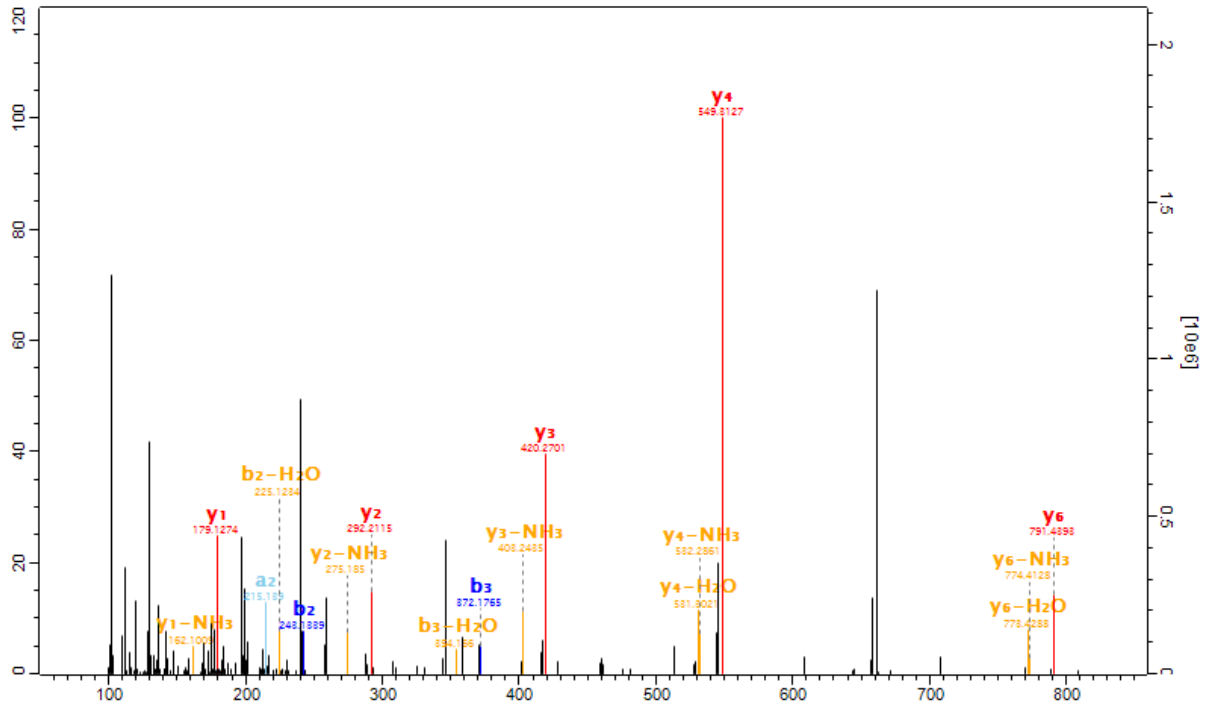

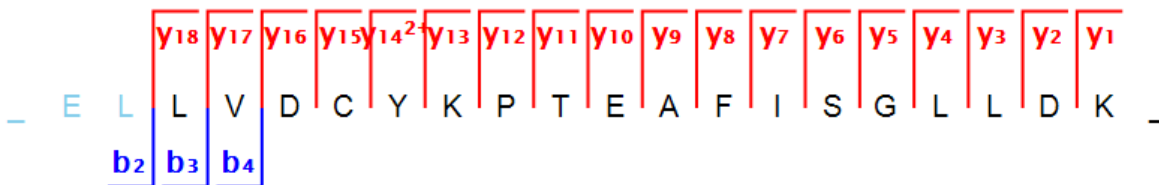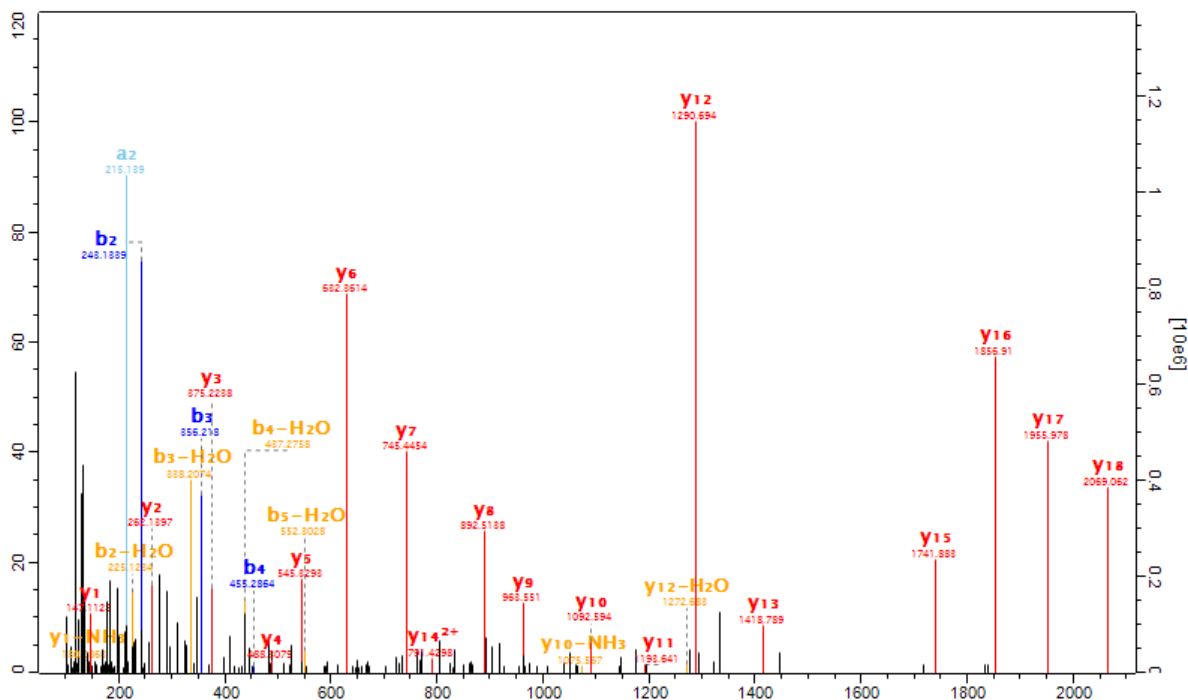

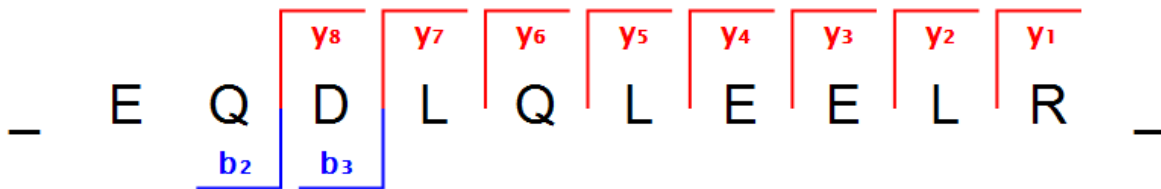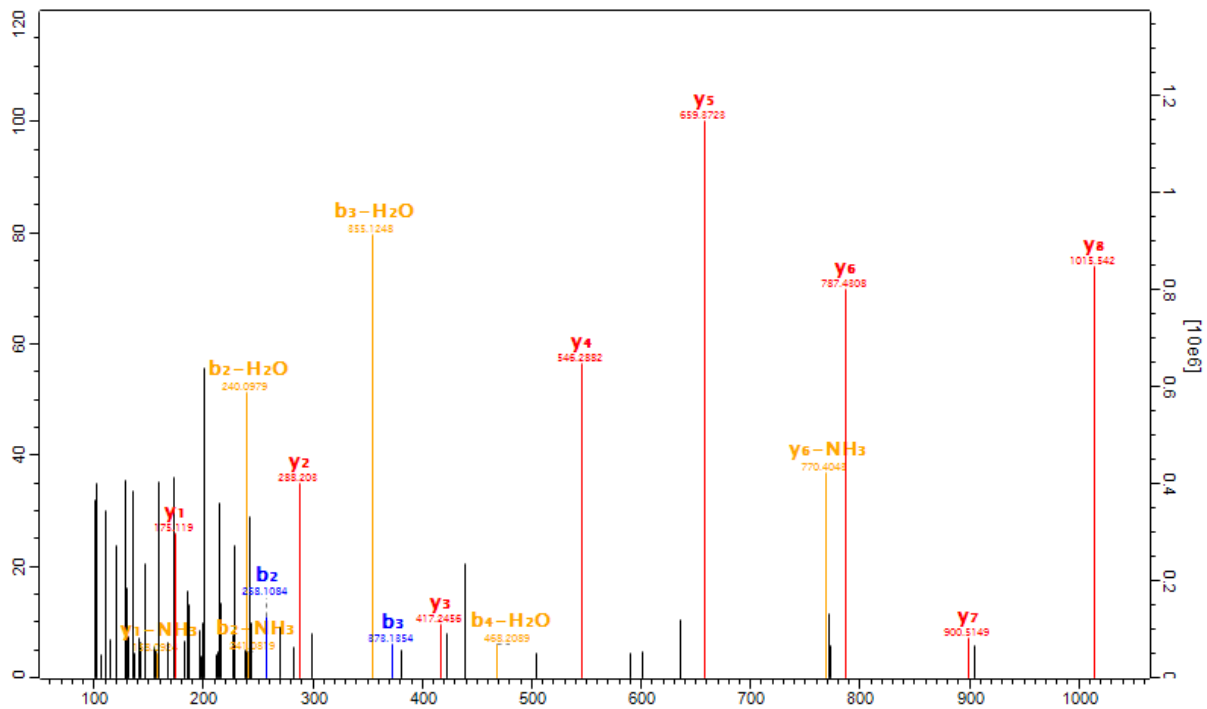

- E S H A T L V F H N L L G E I D Q Q Y S R -  
b<sub>3</sub> b<sub>10</sub> b<sub>11</sub> b<sub>13</sub><sup>2+</sup> b<sub>14</sub> y<sub>6</sub> y<sub>5</sub> y<sub>4</sub> y<sub>3</sub> y<sub>2</sub> y<sub>1</sub>

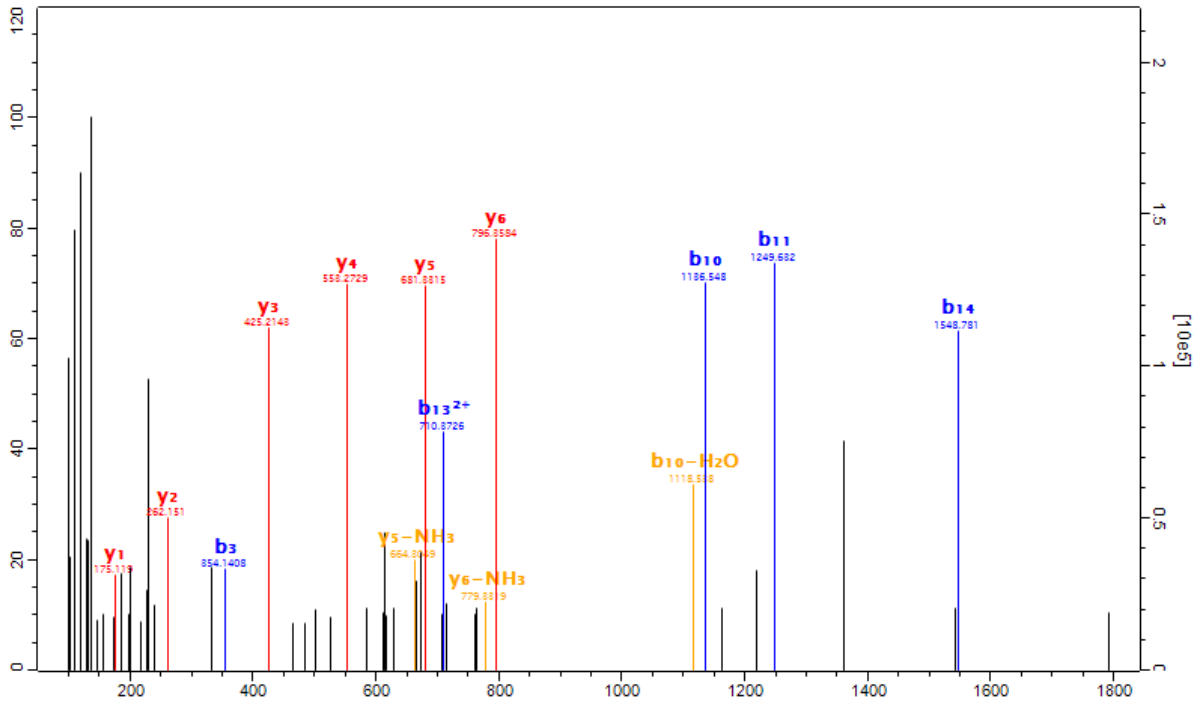

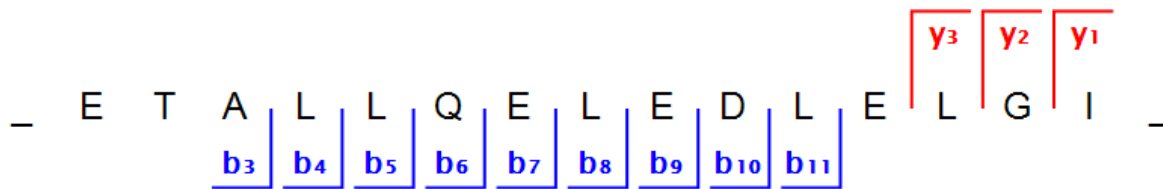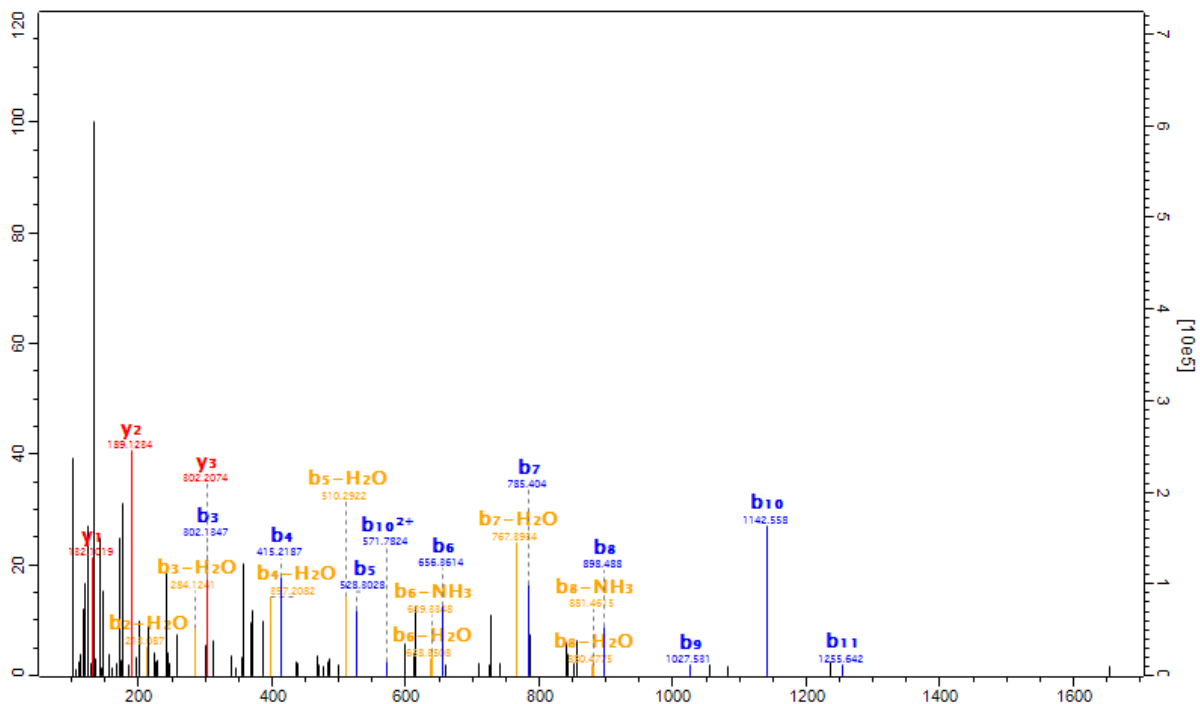

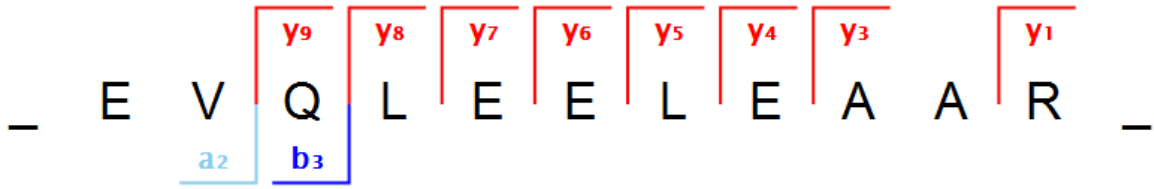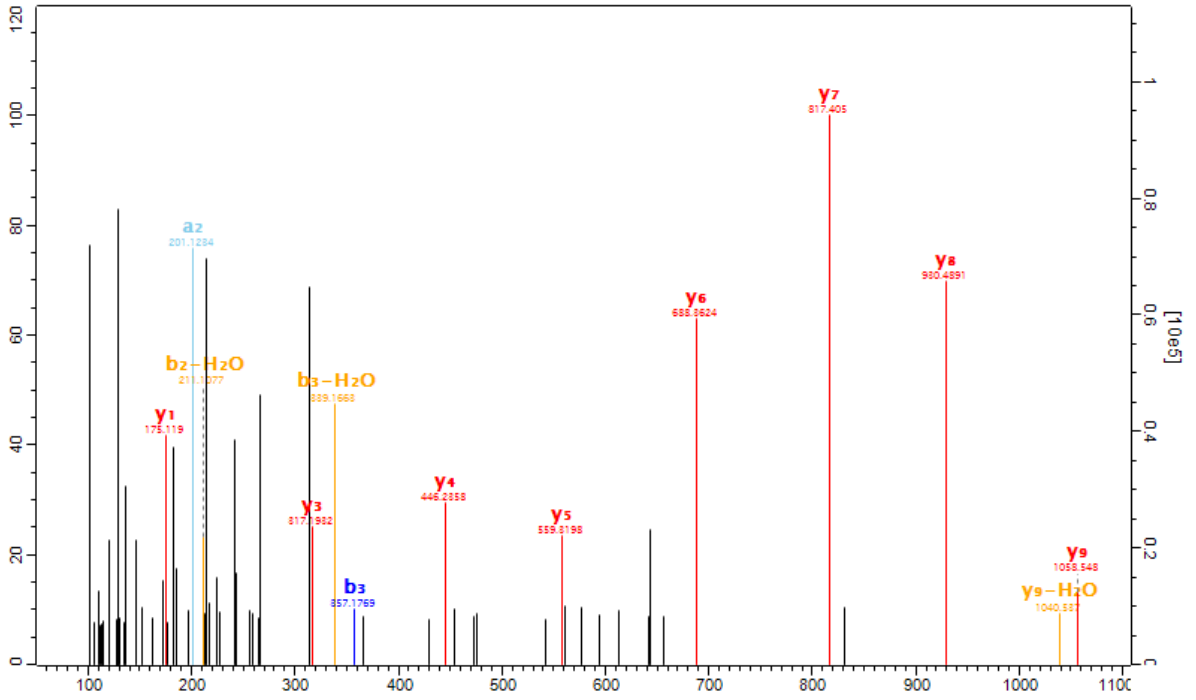



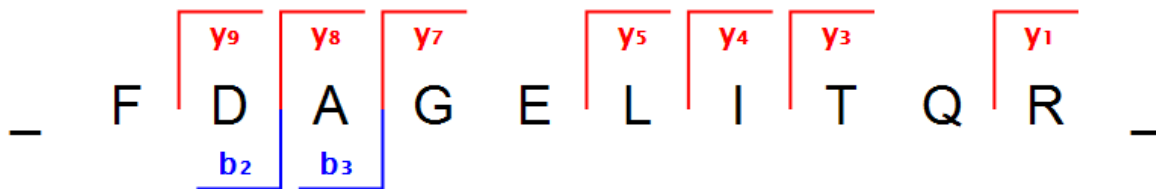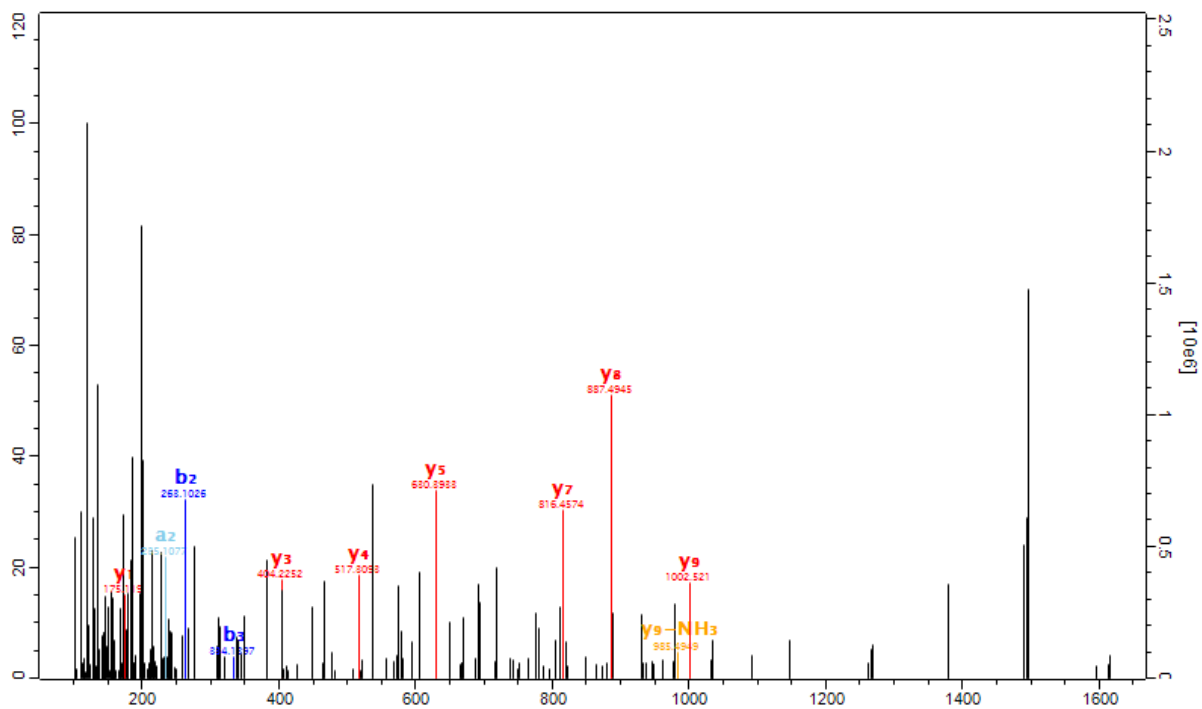

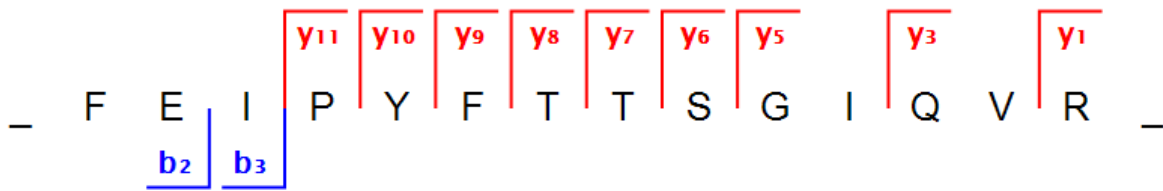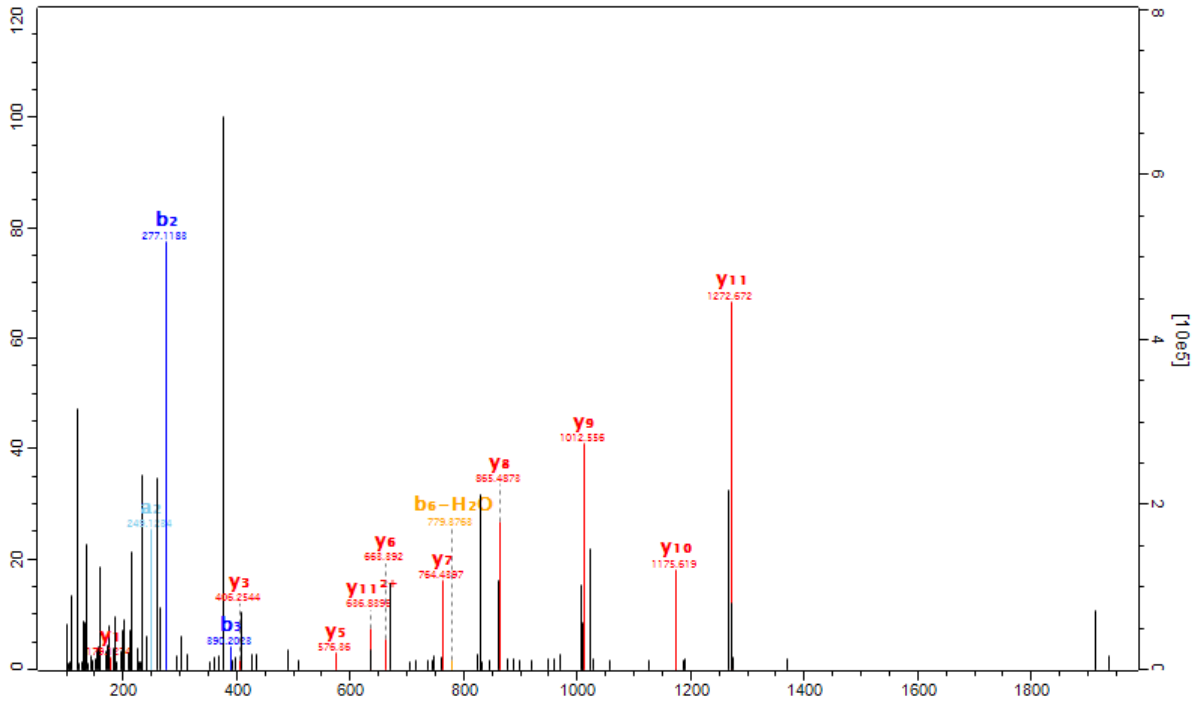

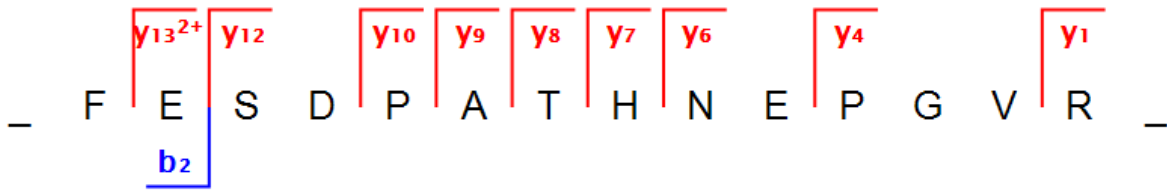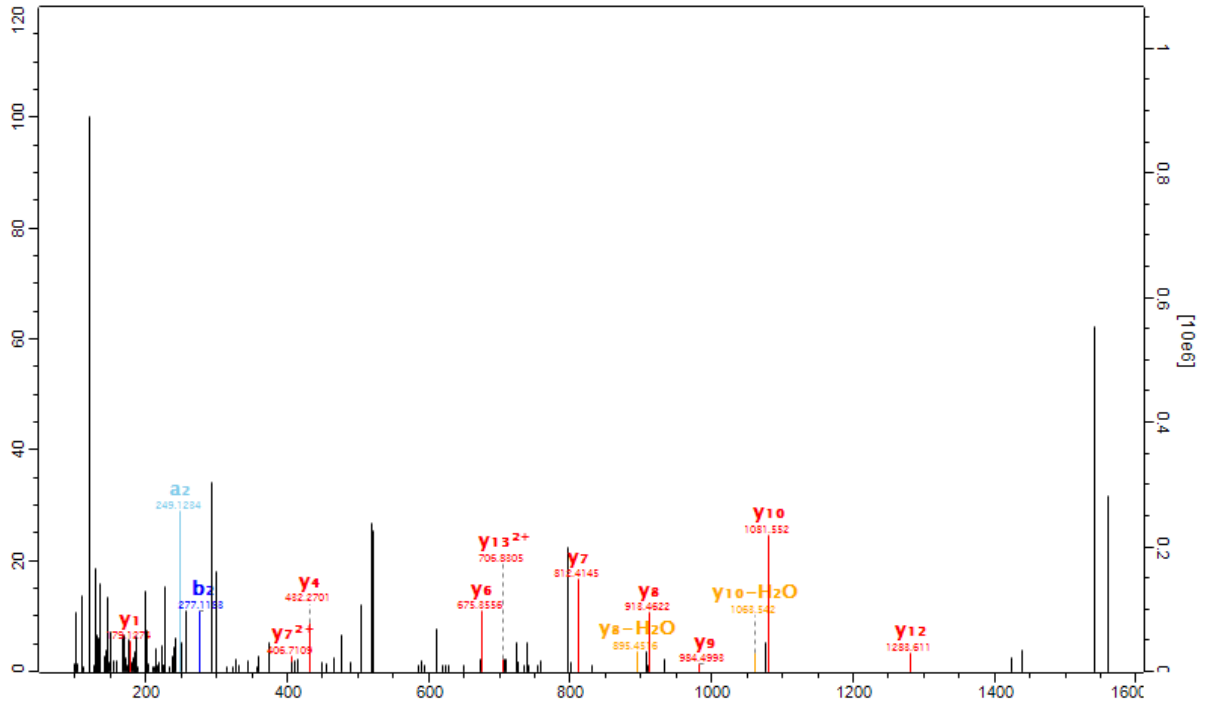

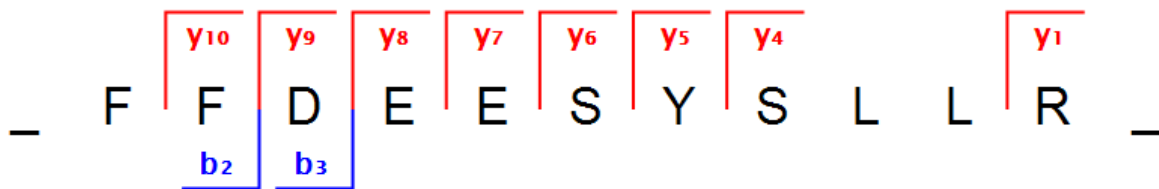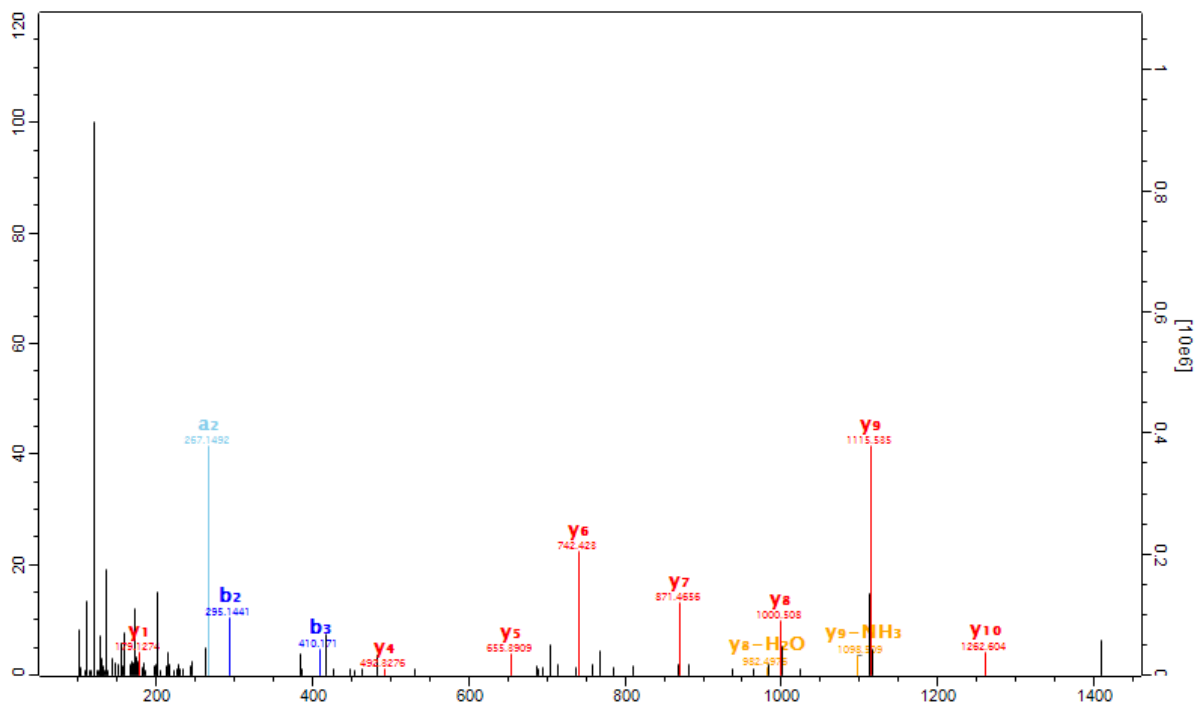

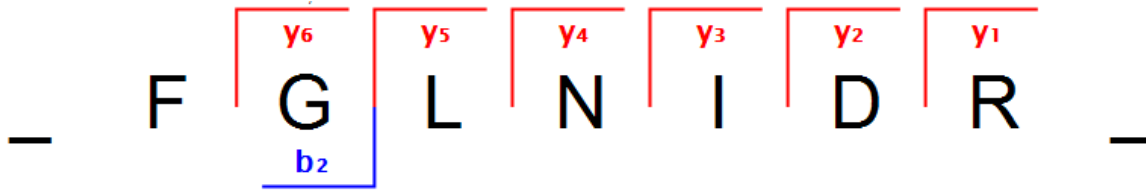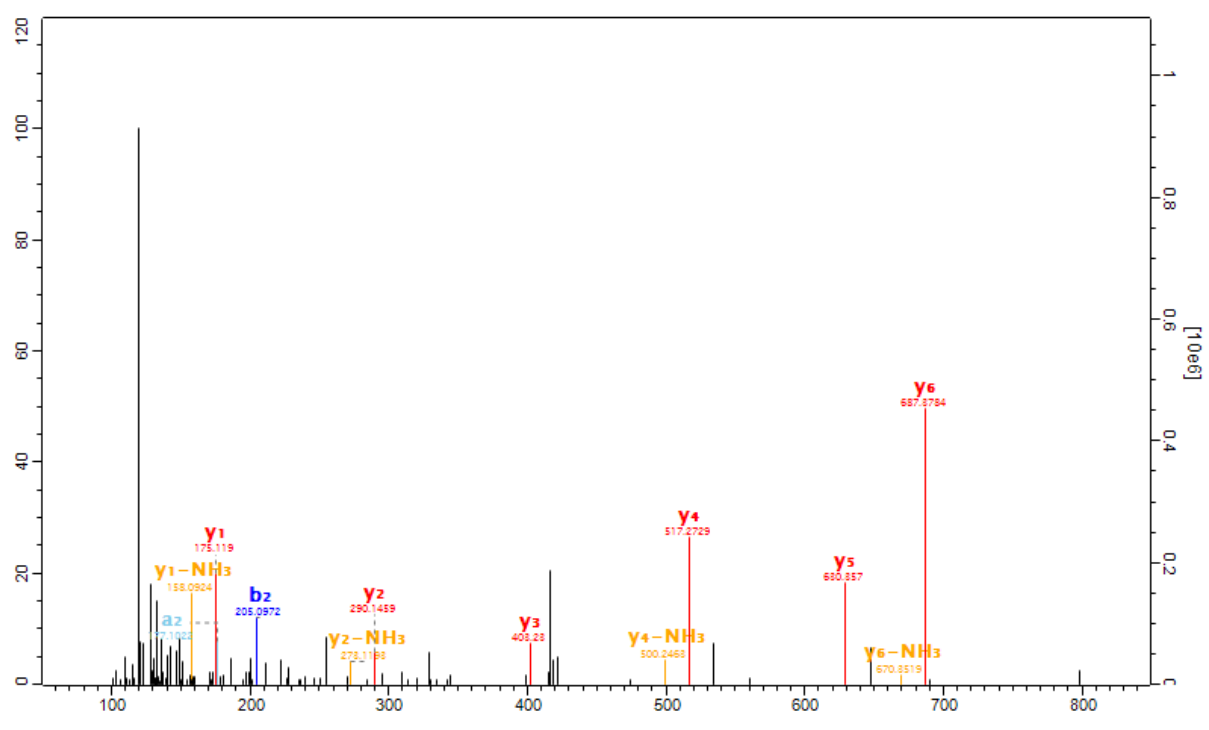

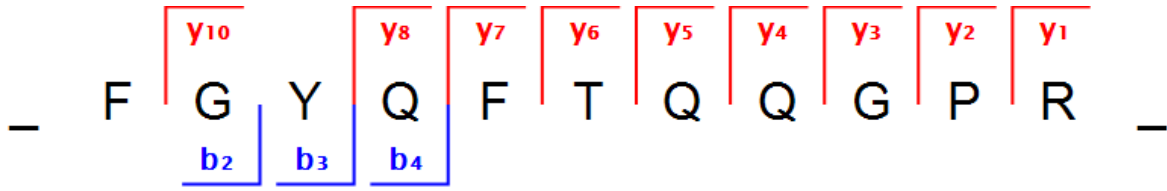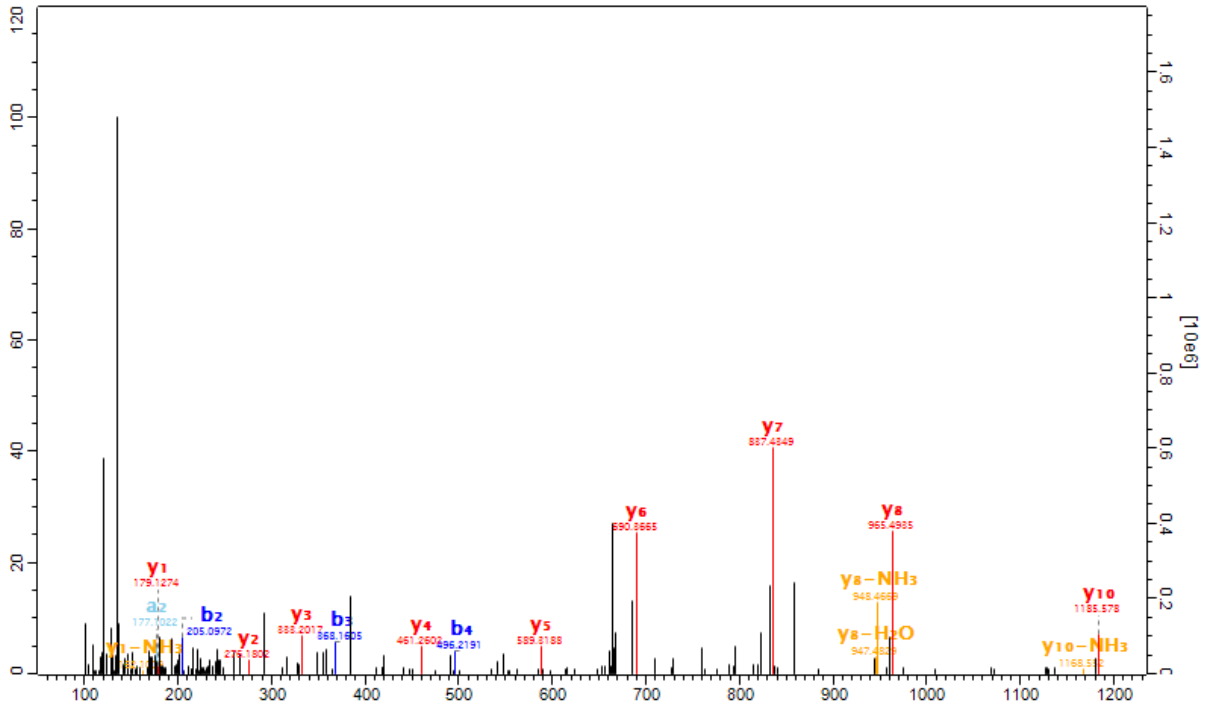

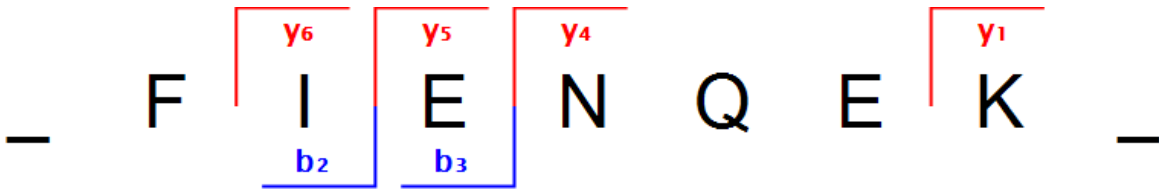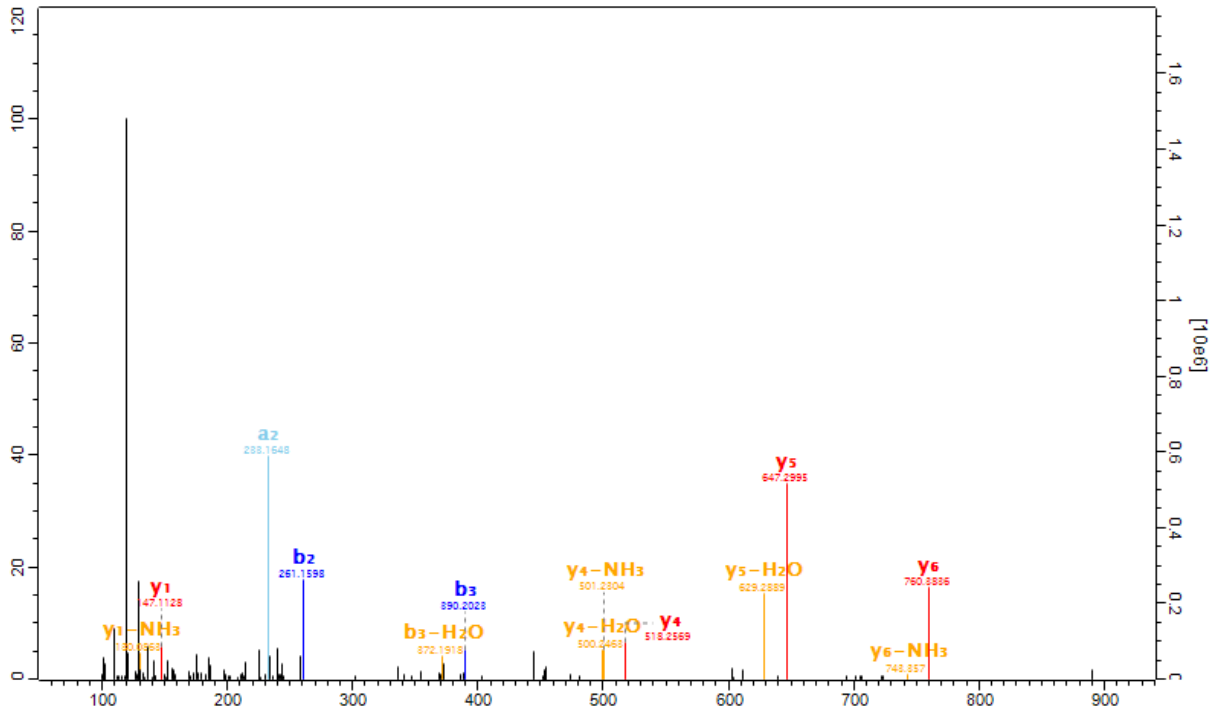

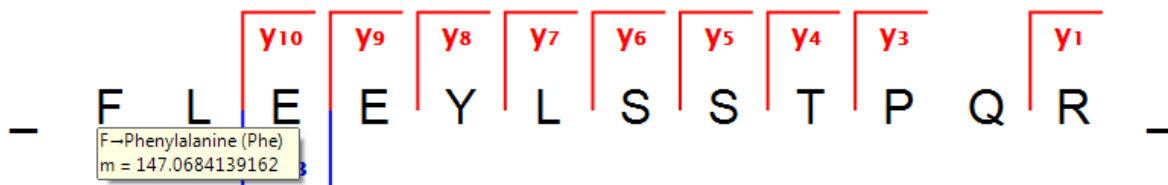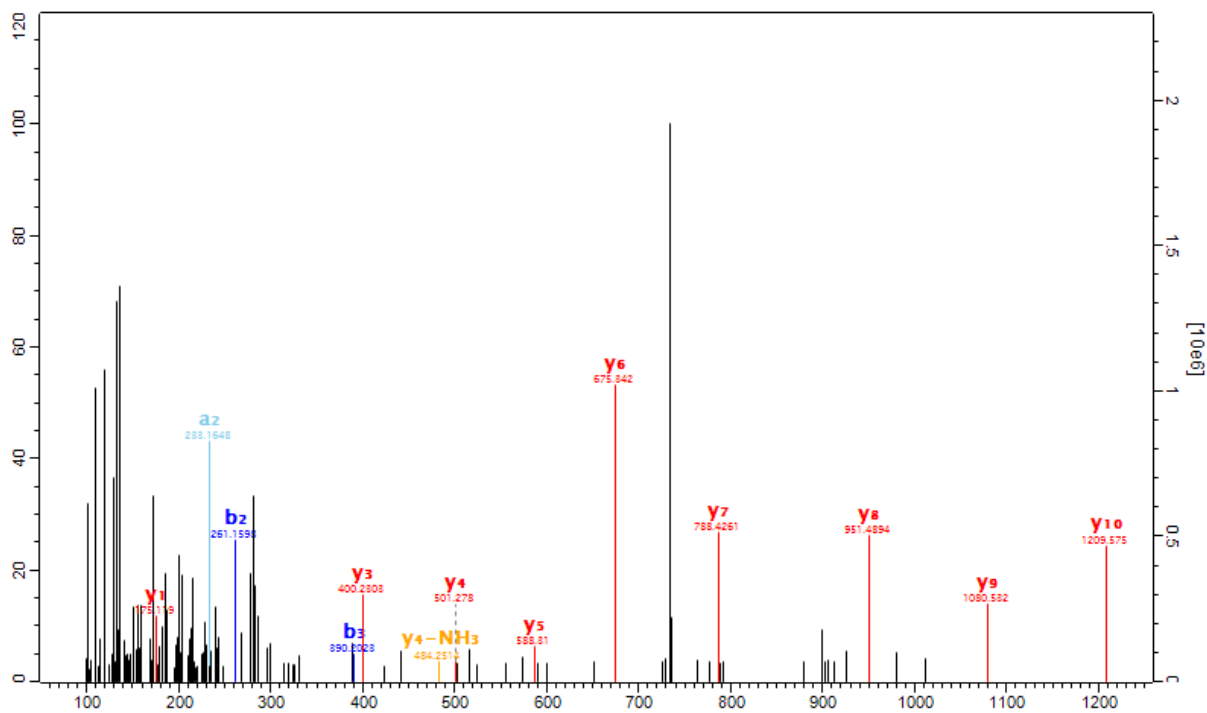



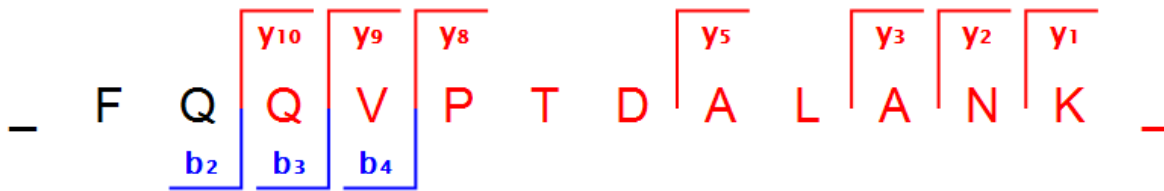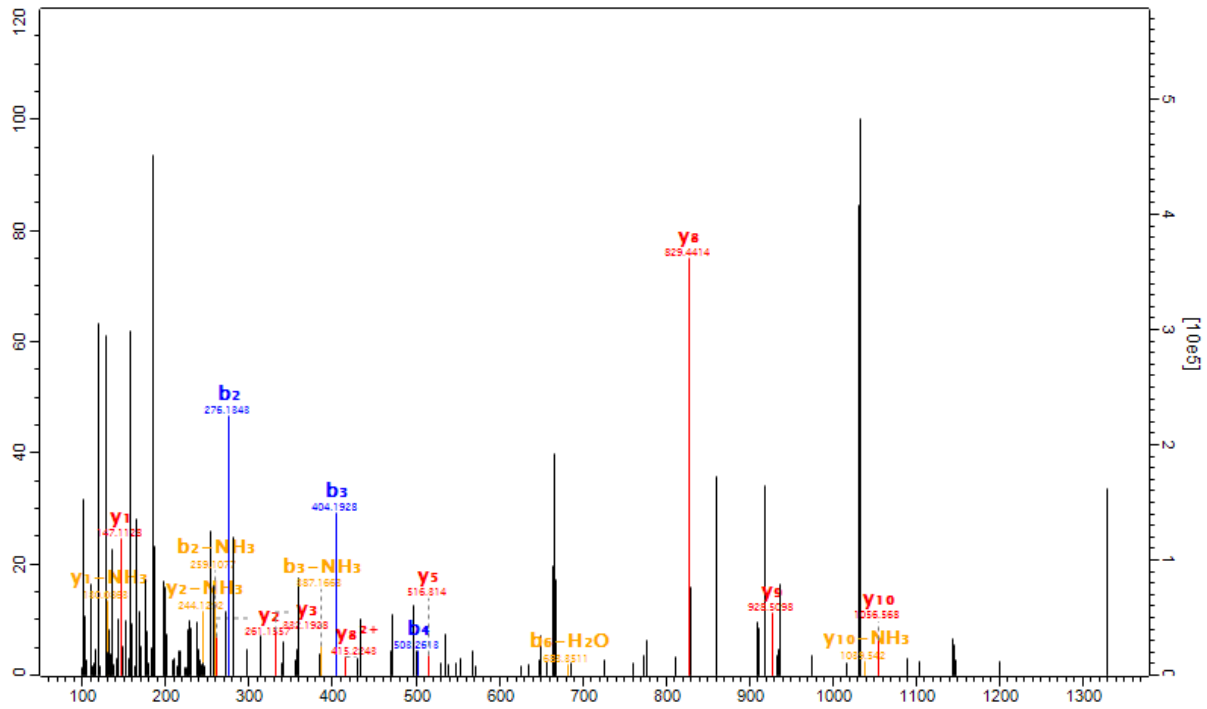

- F S H L T S L P Q Q L P S Q Q L M S K -  
b<sub>3</sub>
b<sub>7</sub>
b<sub>10</sub>
y<sub>8</sub>
y<sub>1</sub>

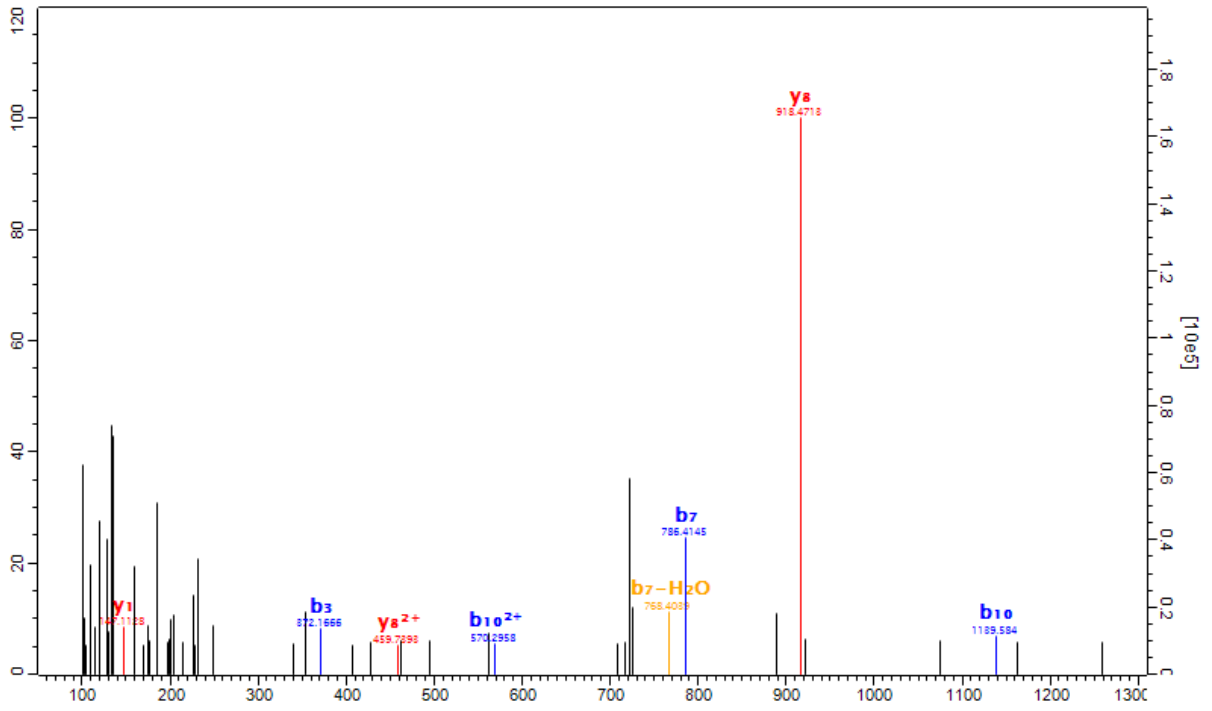

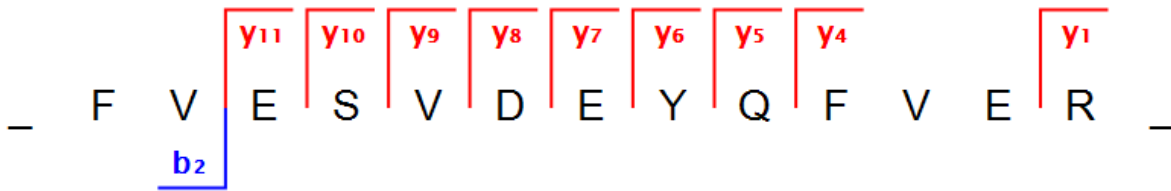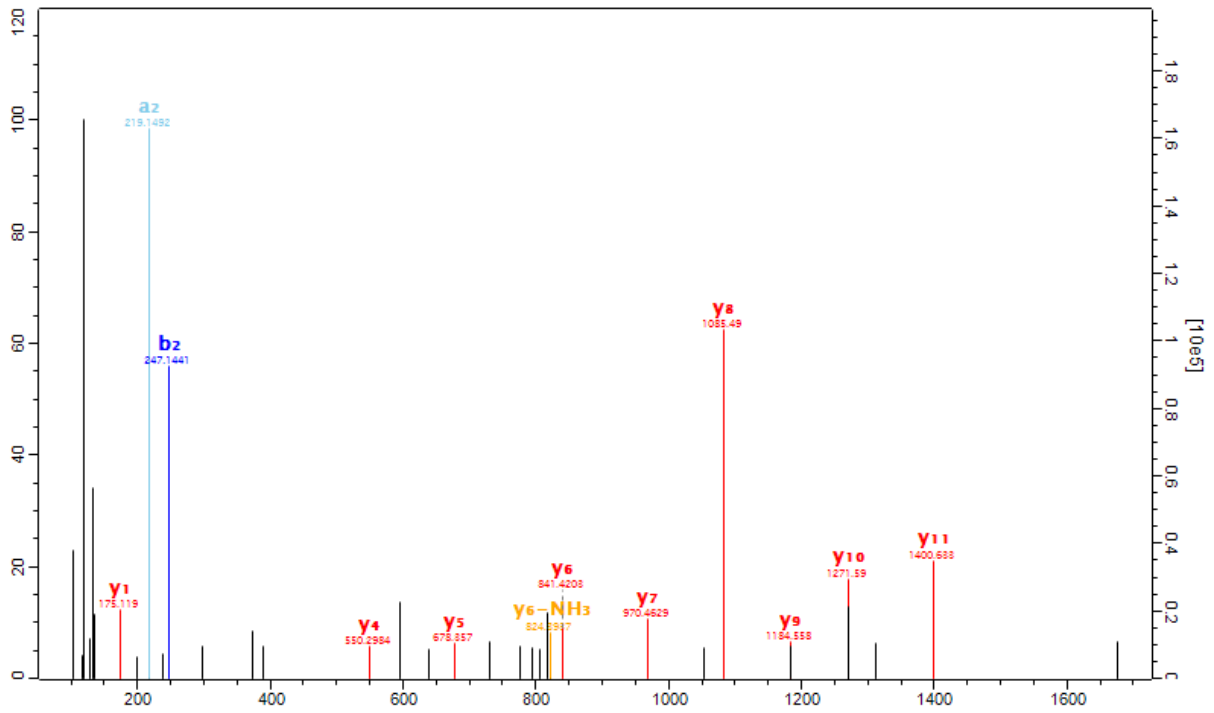

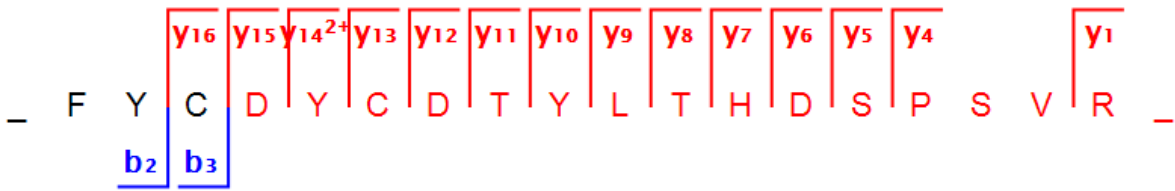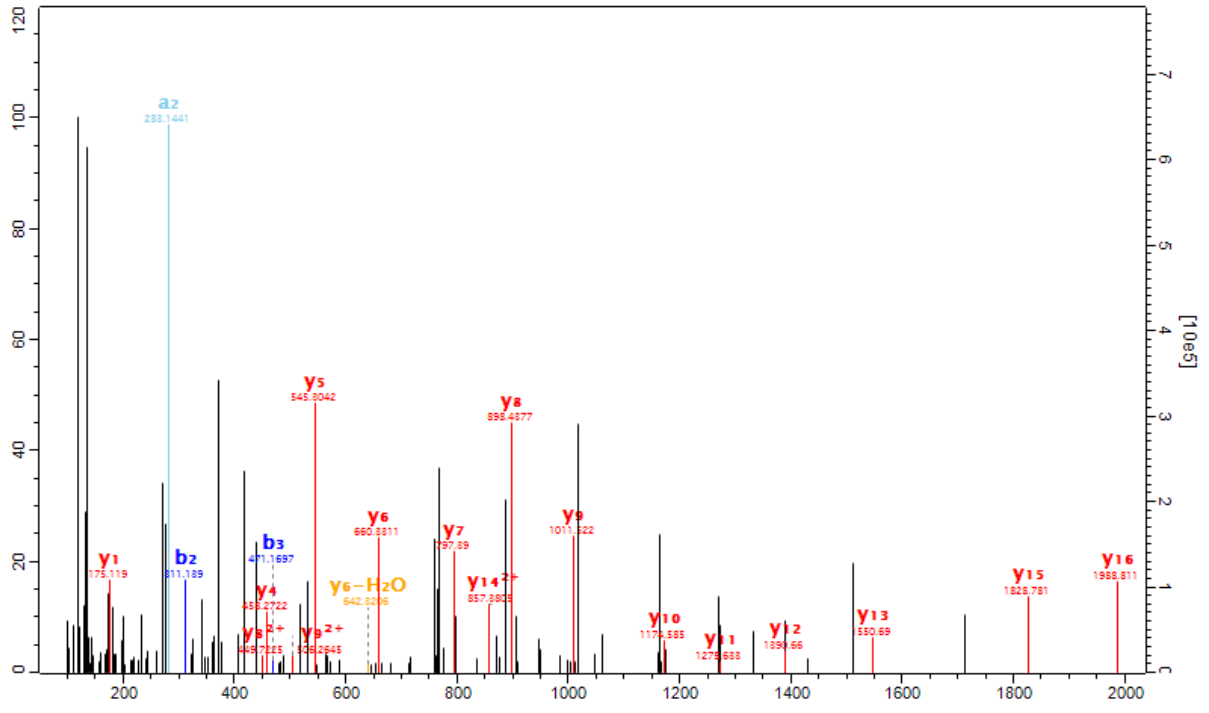

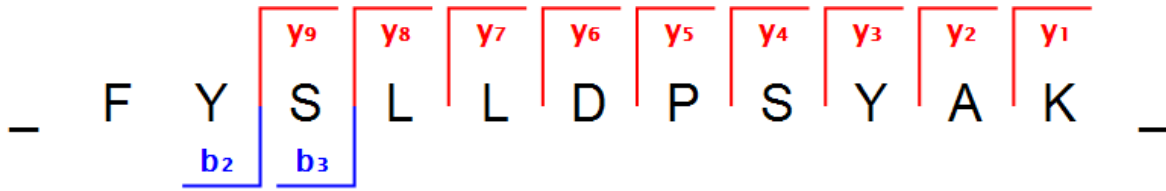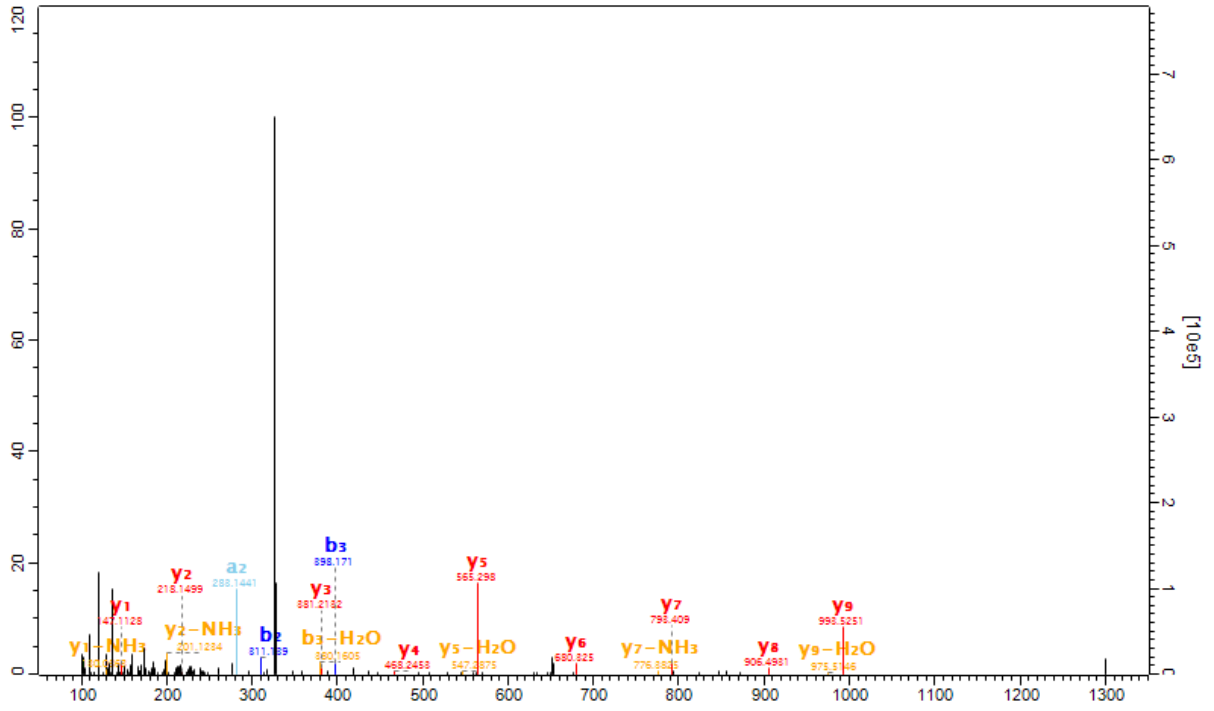

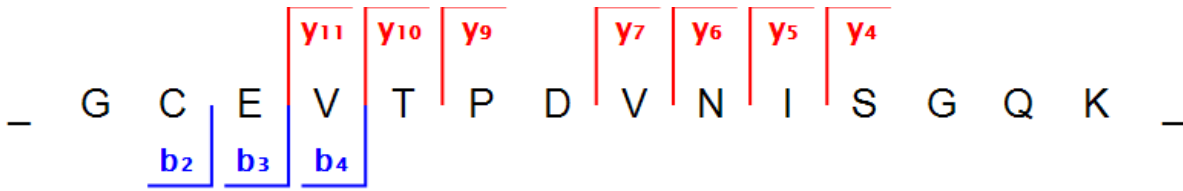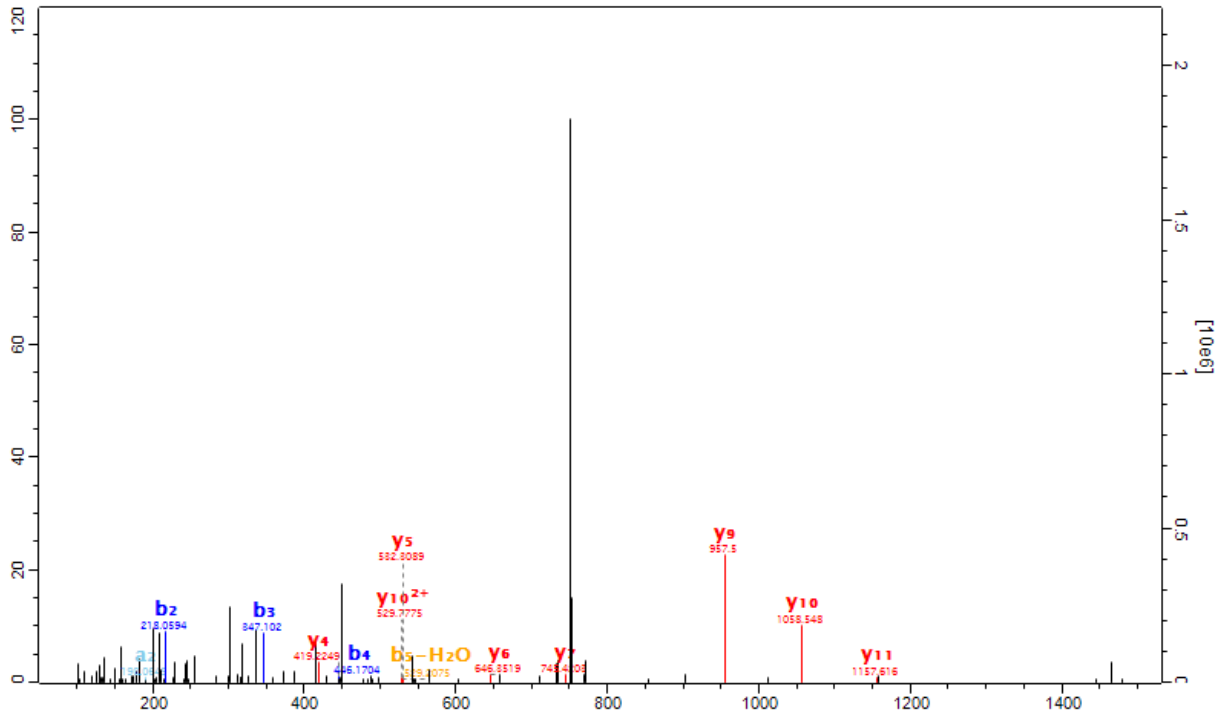

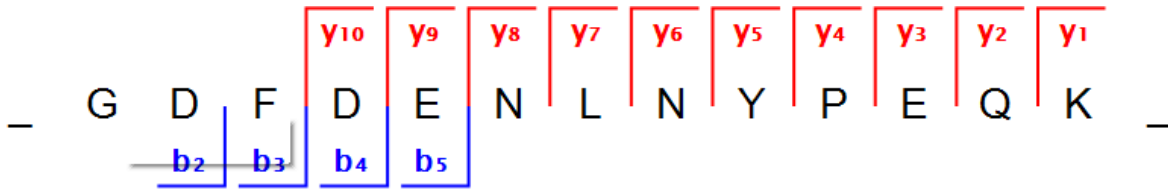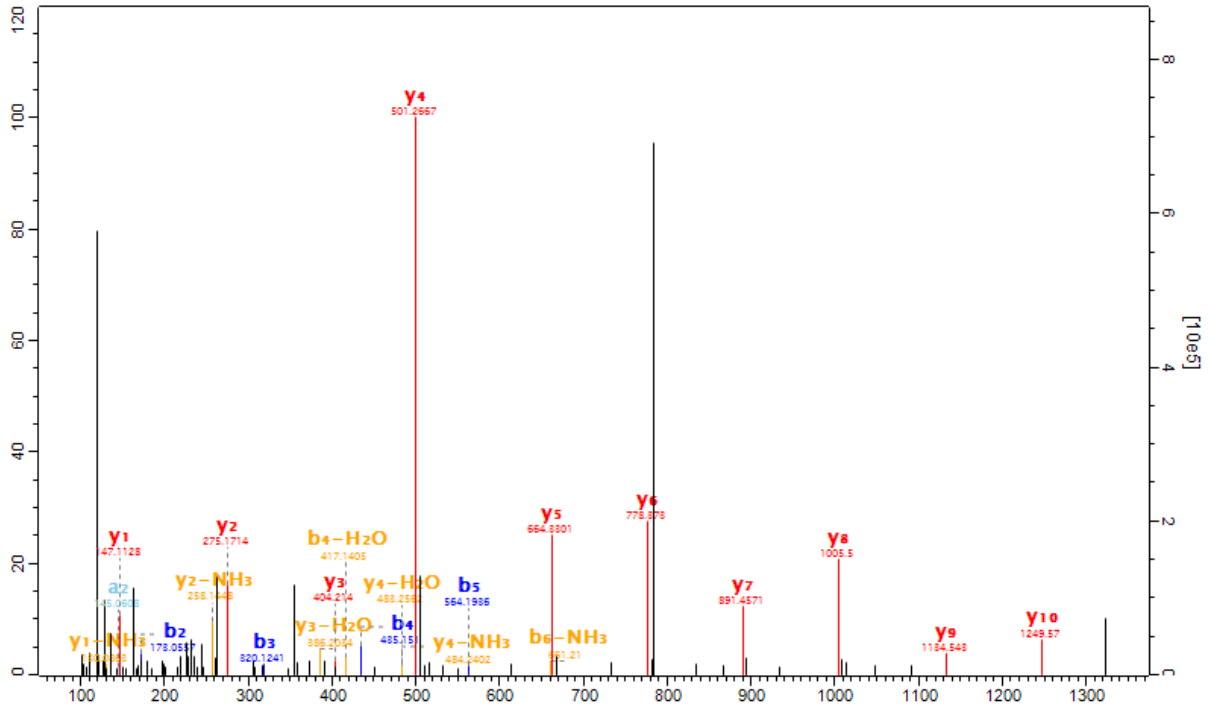

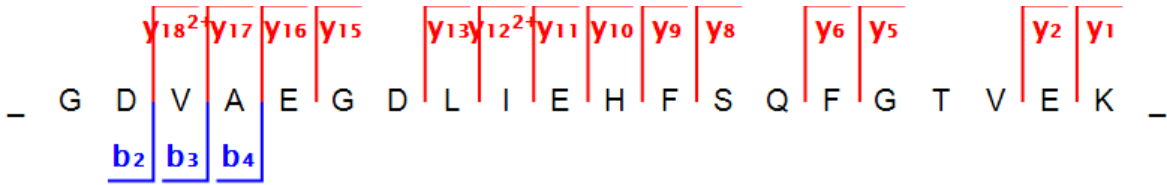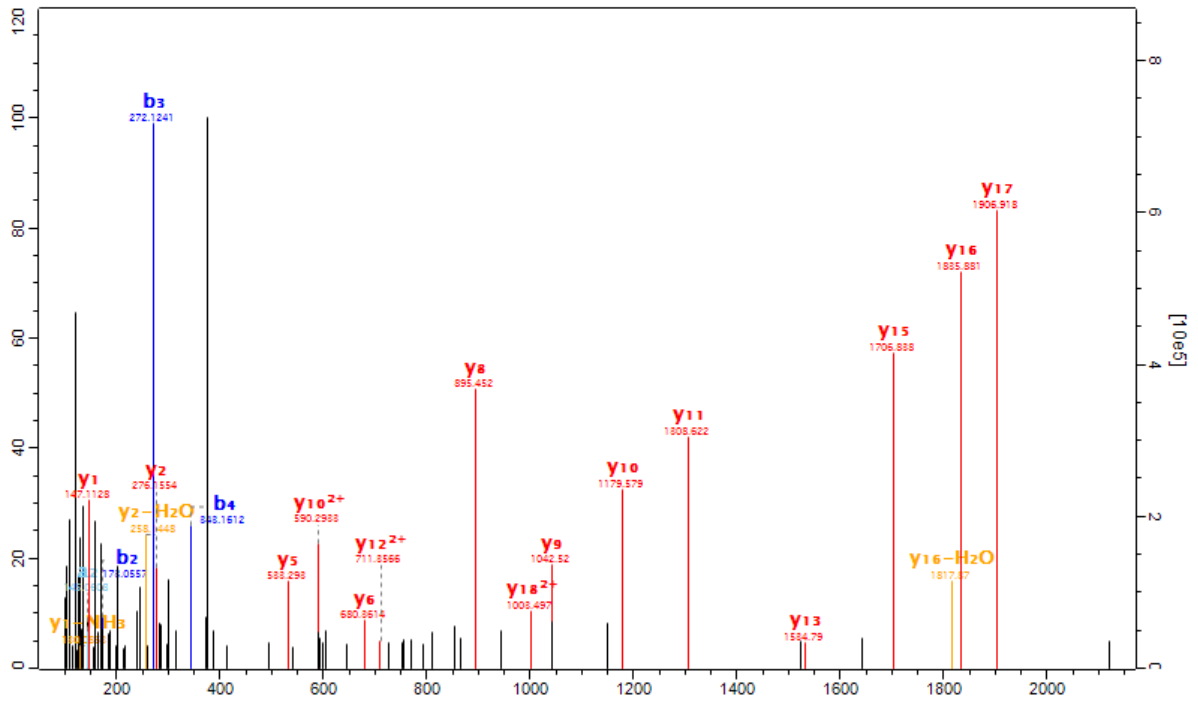



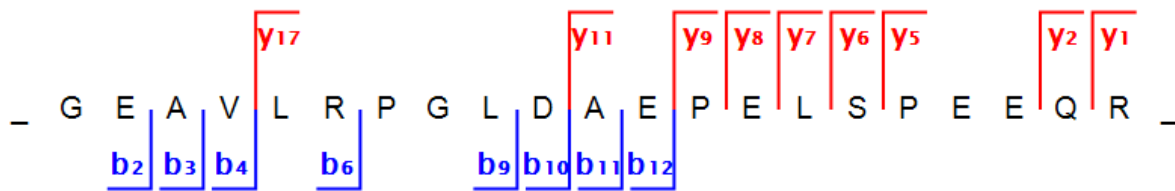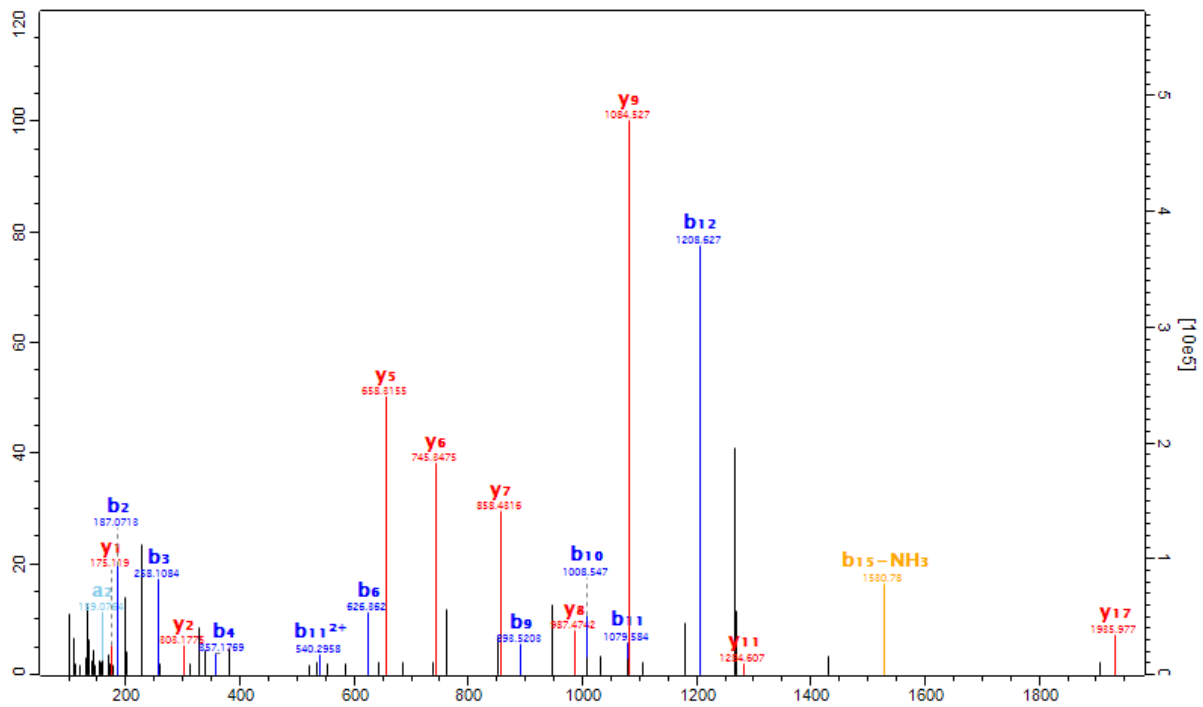

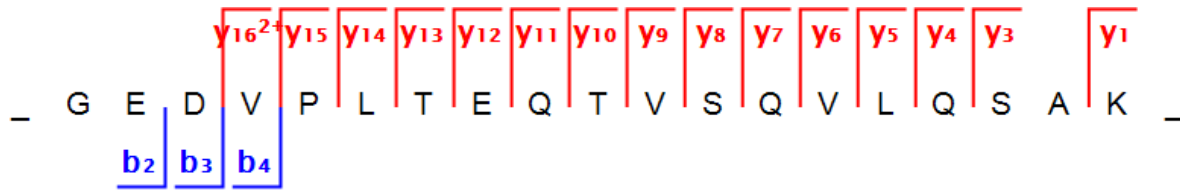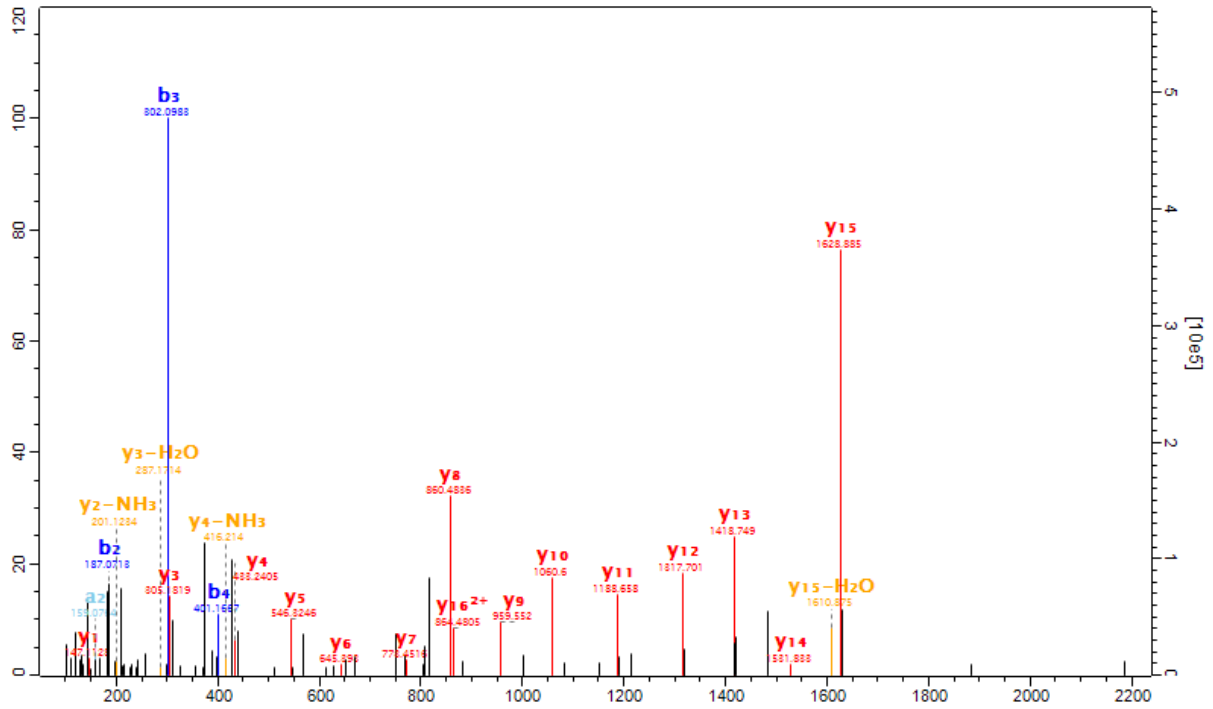

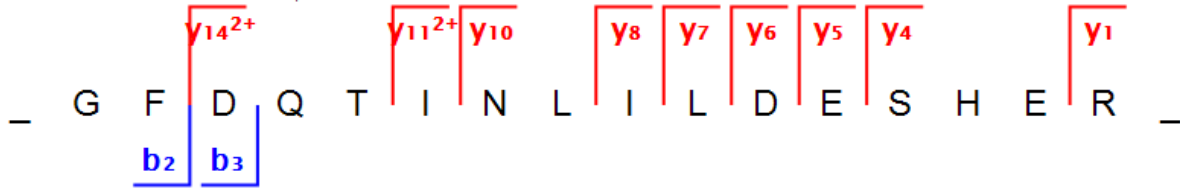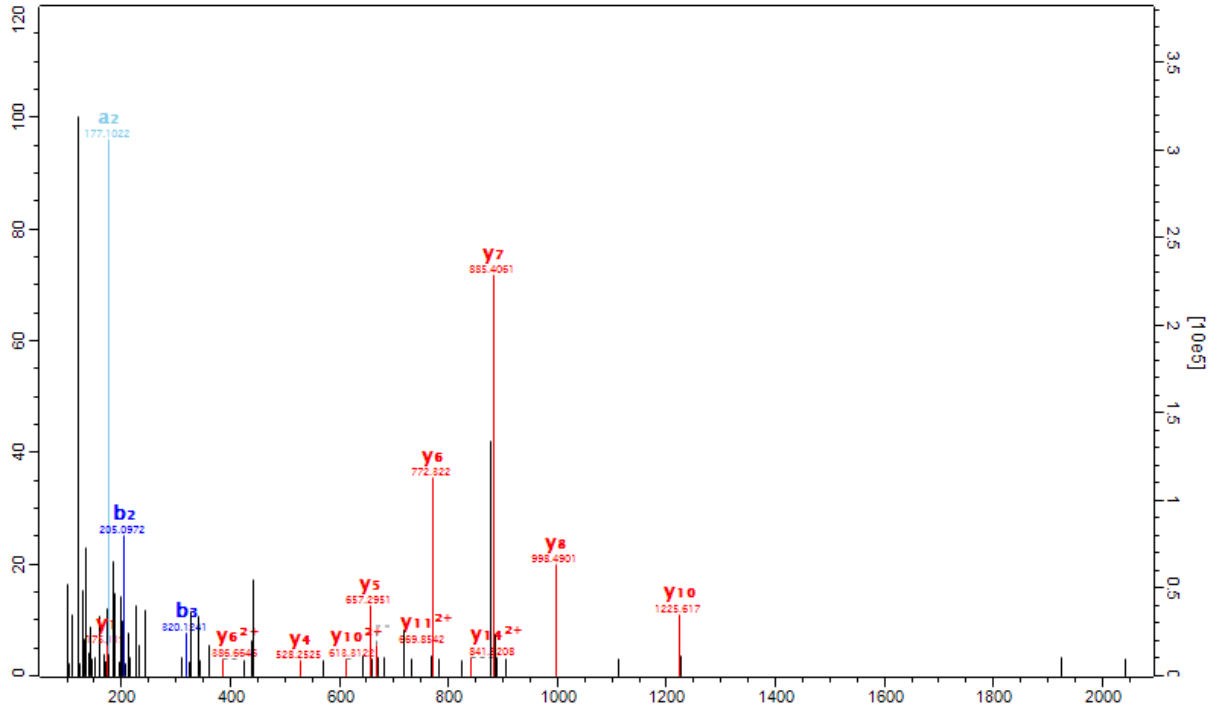



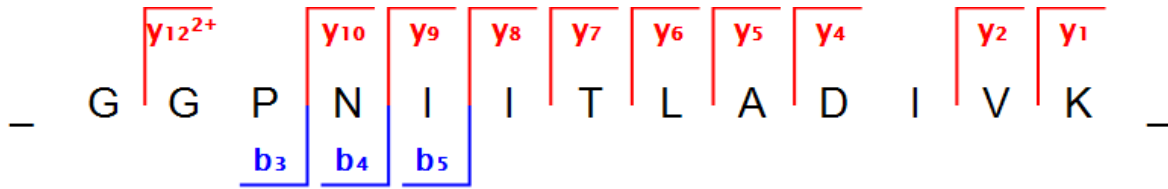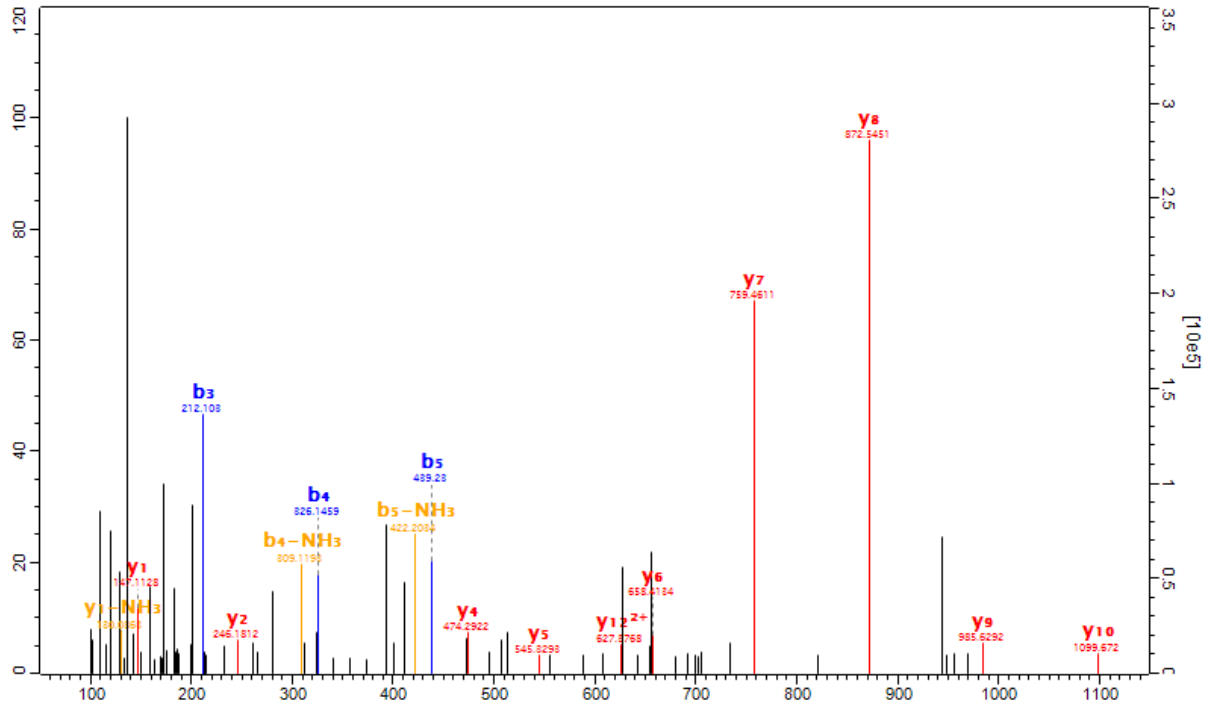

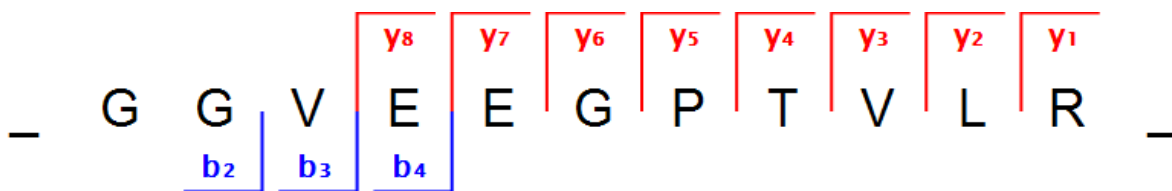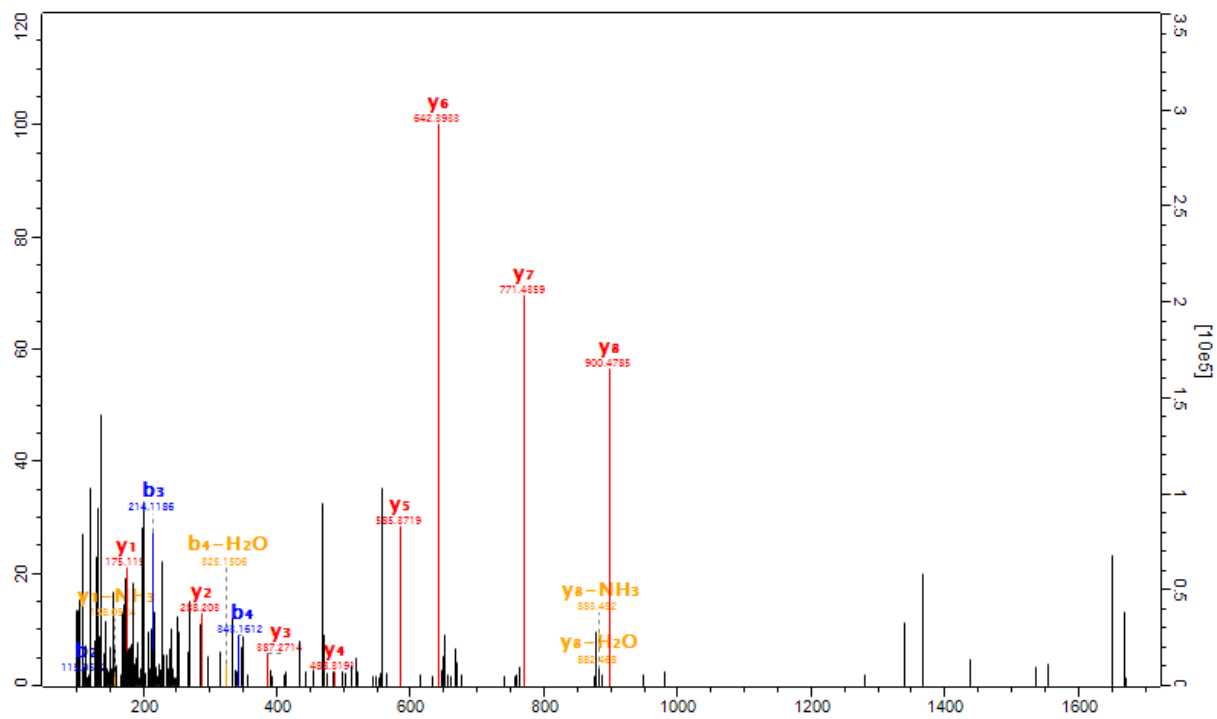

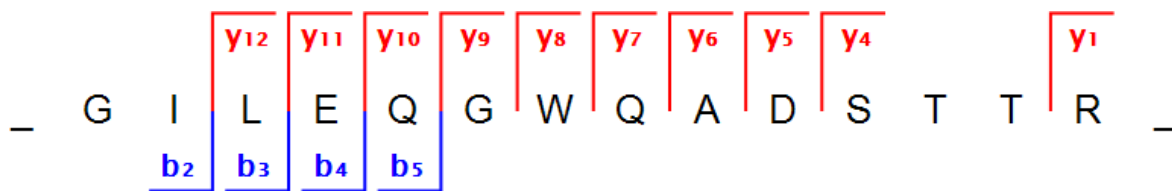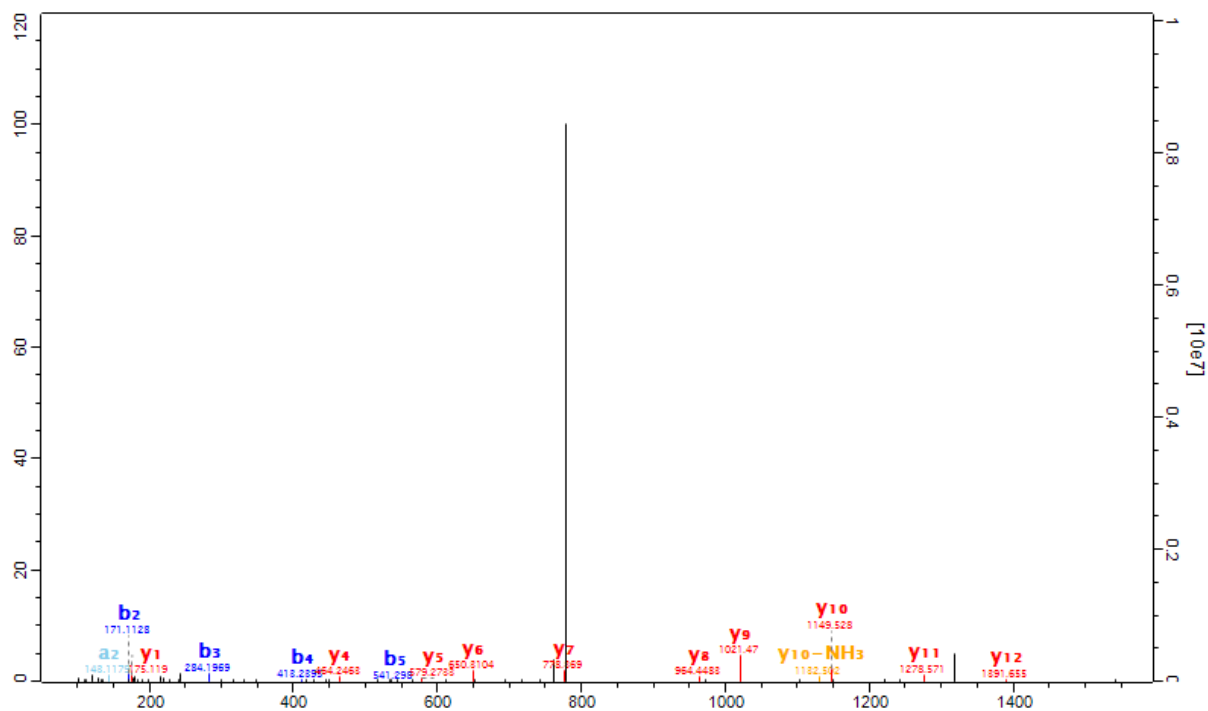

- G L E H V T V D D L V A E I T P K -  
           **b<sub>2</sub>**          **b<sub>4</sub>** **b<sub>5</sub>** **b<sub>6</sub>** **b<sub>7</sub>** **b<sub>8</sub>** **b<sub>9</sub>** **b<sub>10</sub>**          **y<sub>7</sub>** **y<sub>6</sub>** **y<sub>5</sub>** **y<sub>4</sub>** **y<sub>3</sub>** **y<sub>2</sub>** **y<sub>1</sub>**

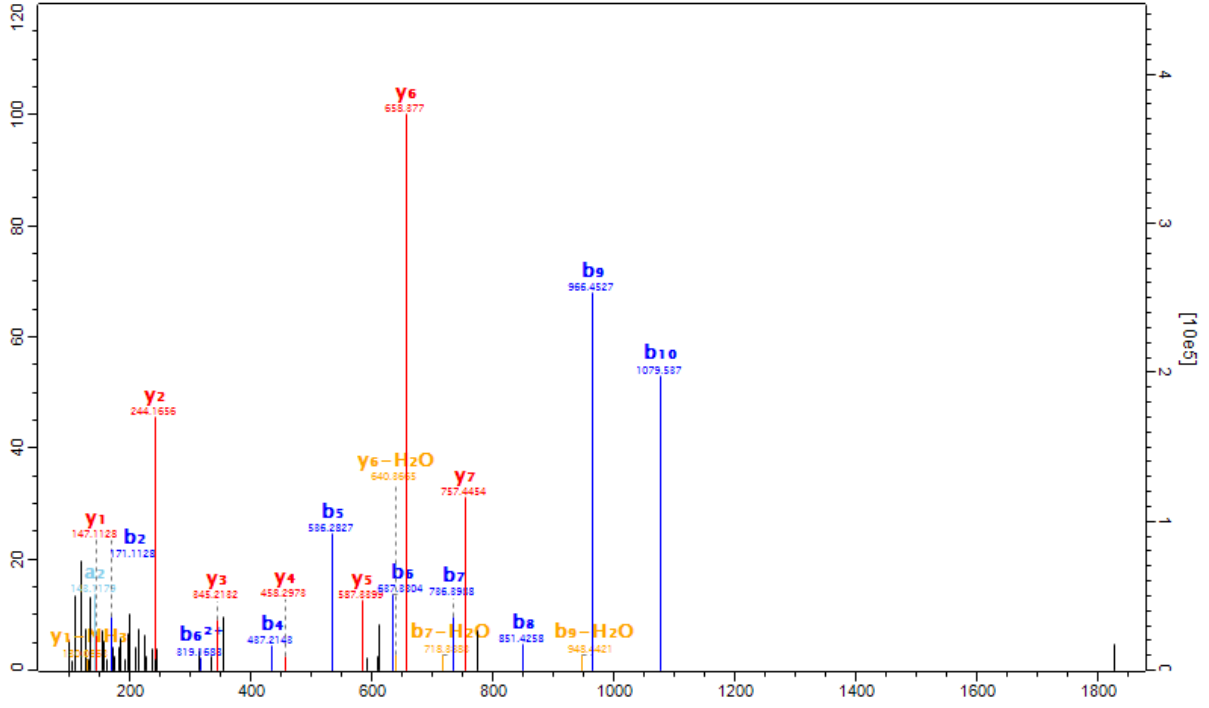



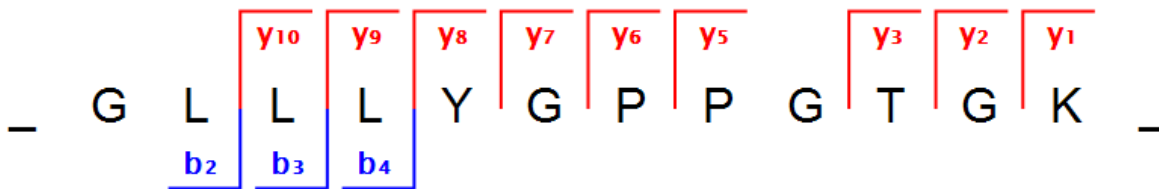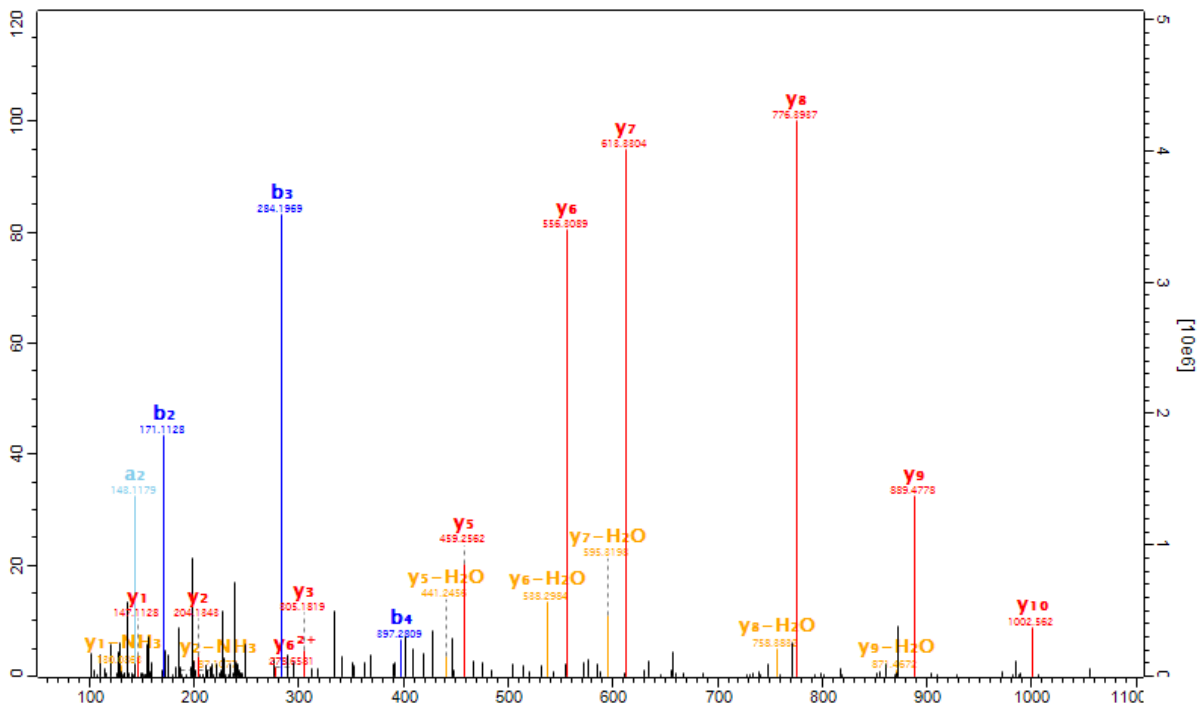

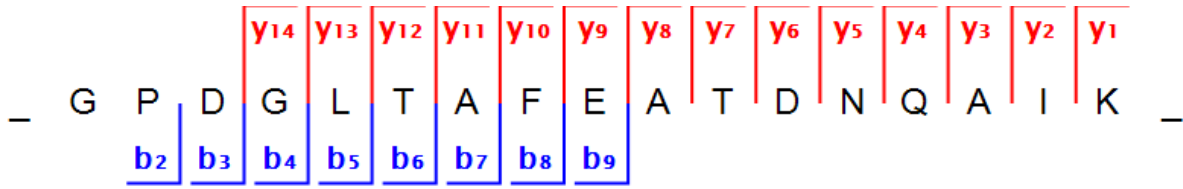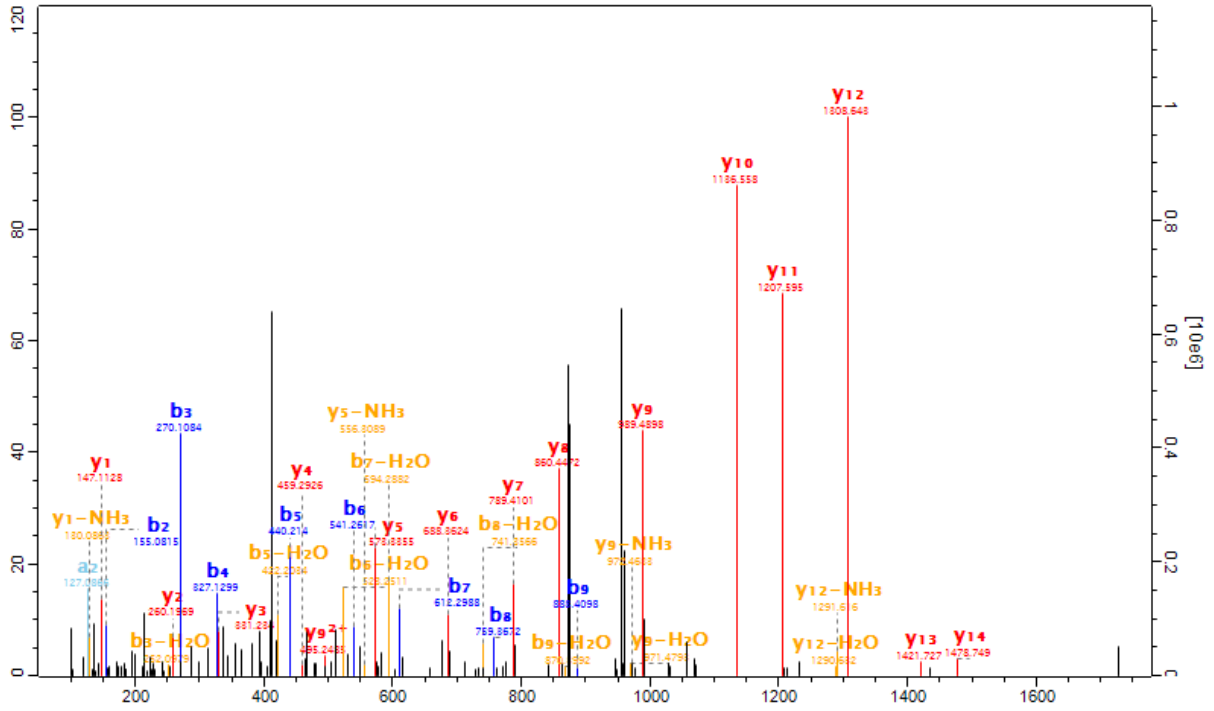

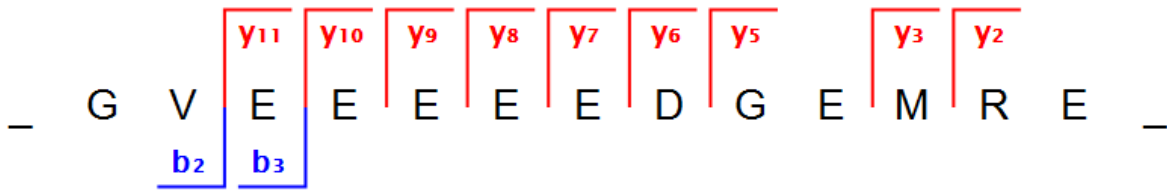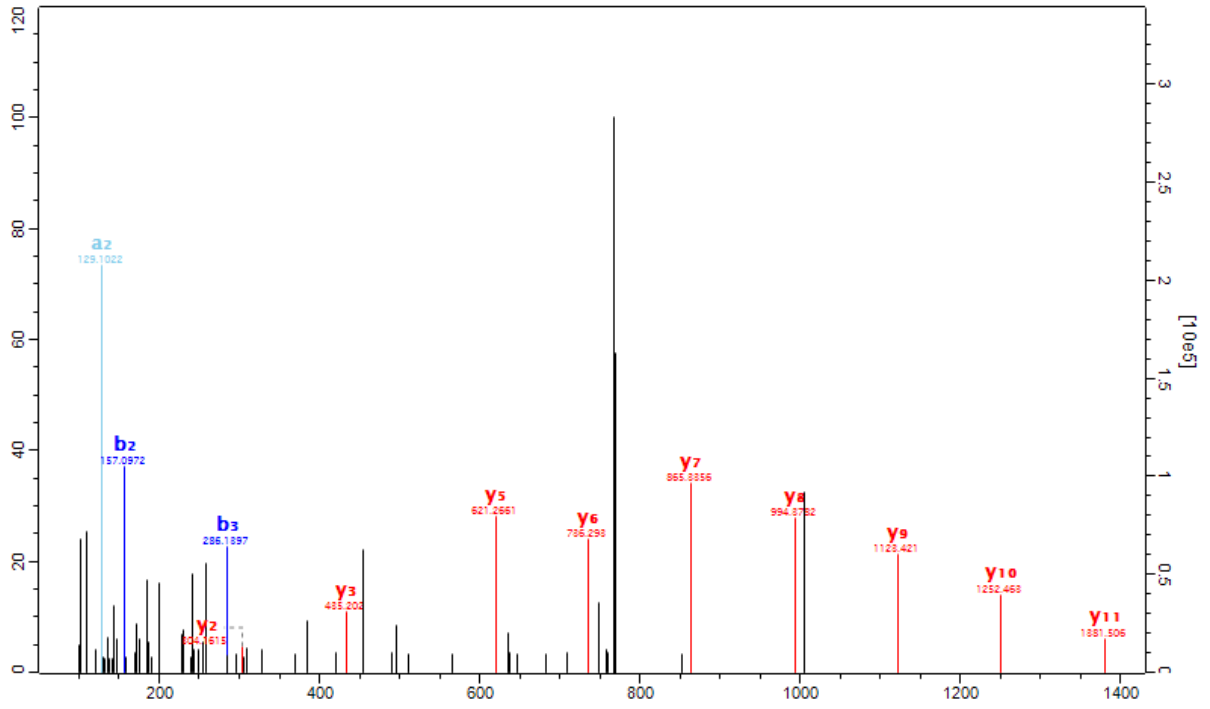

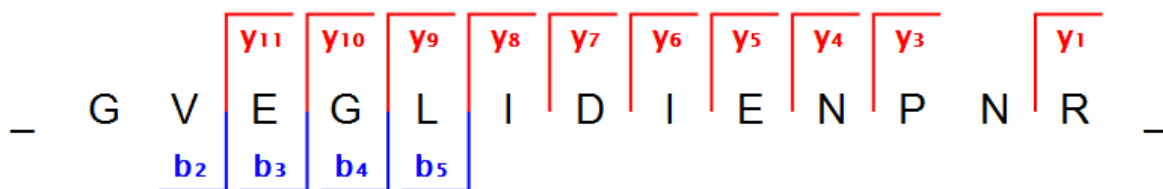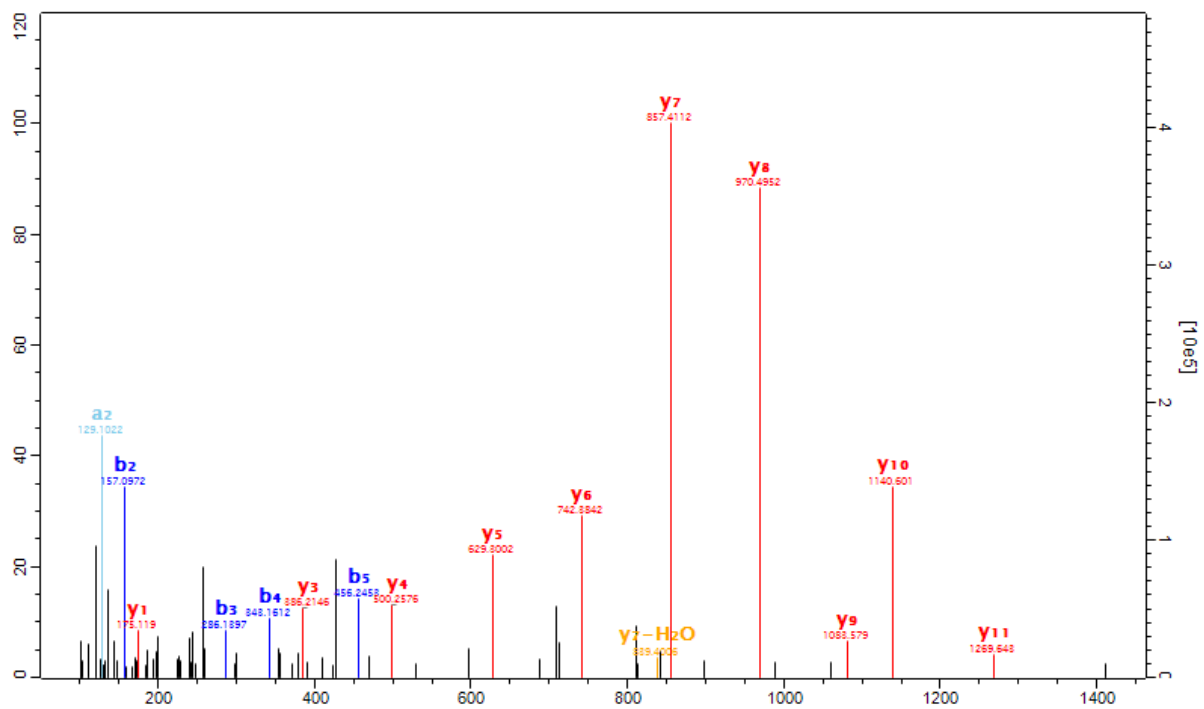

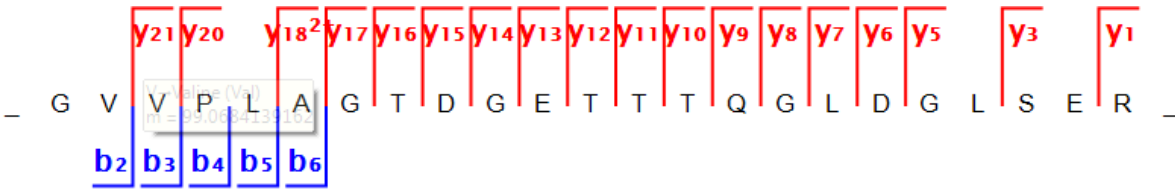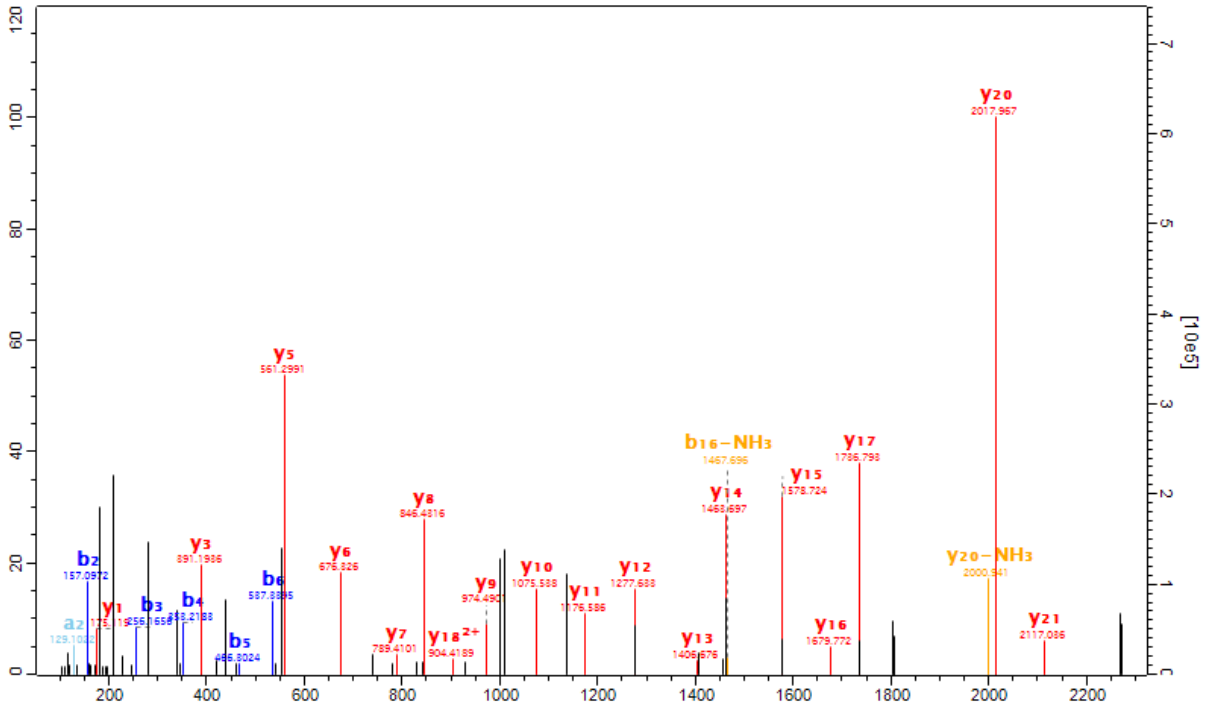

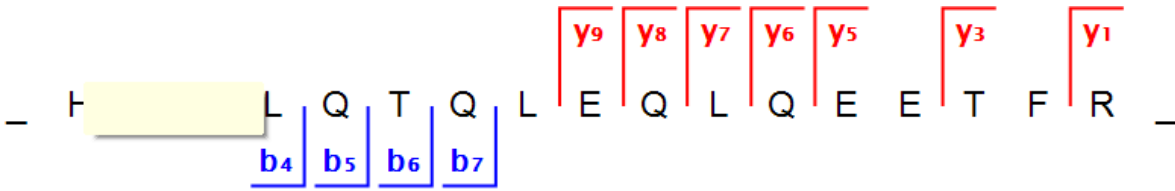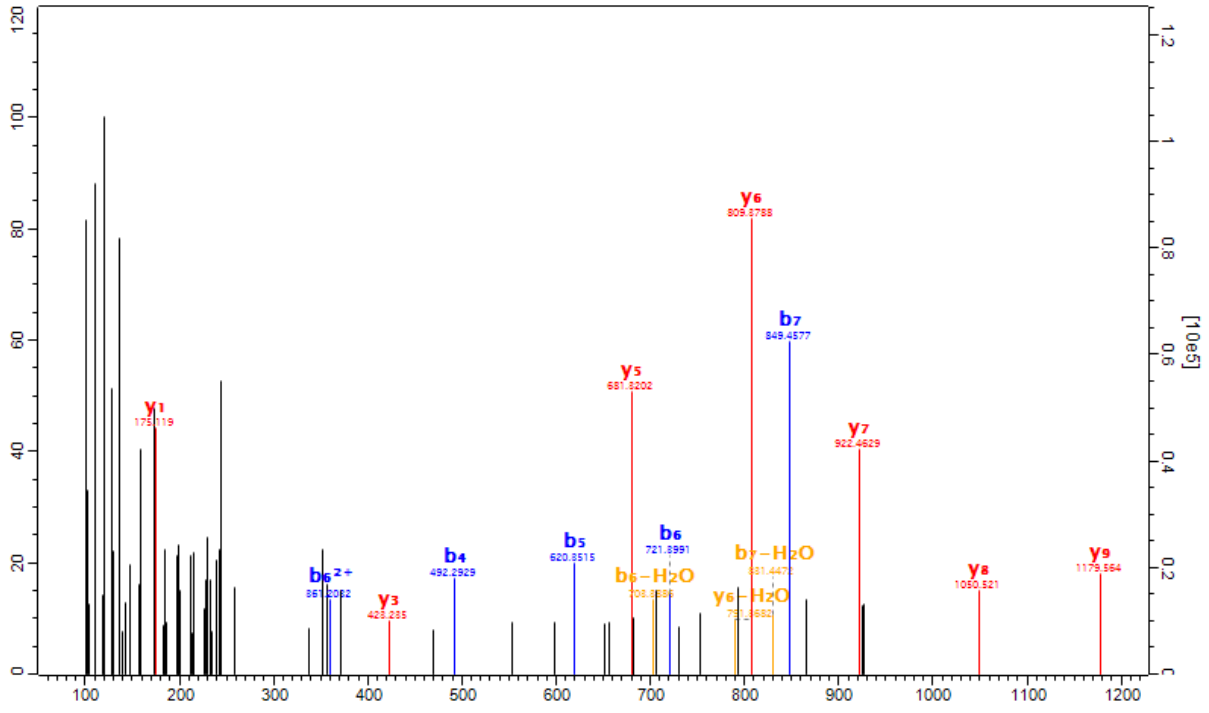

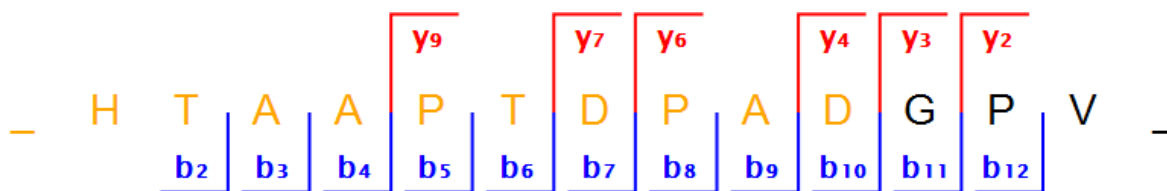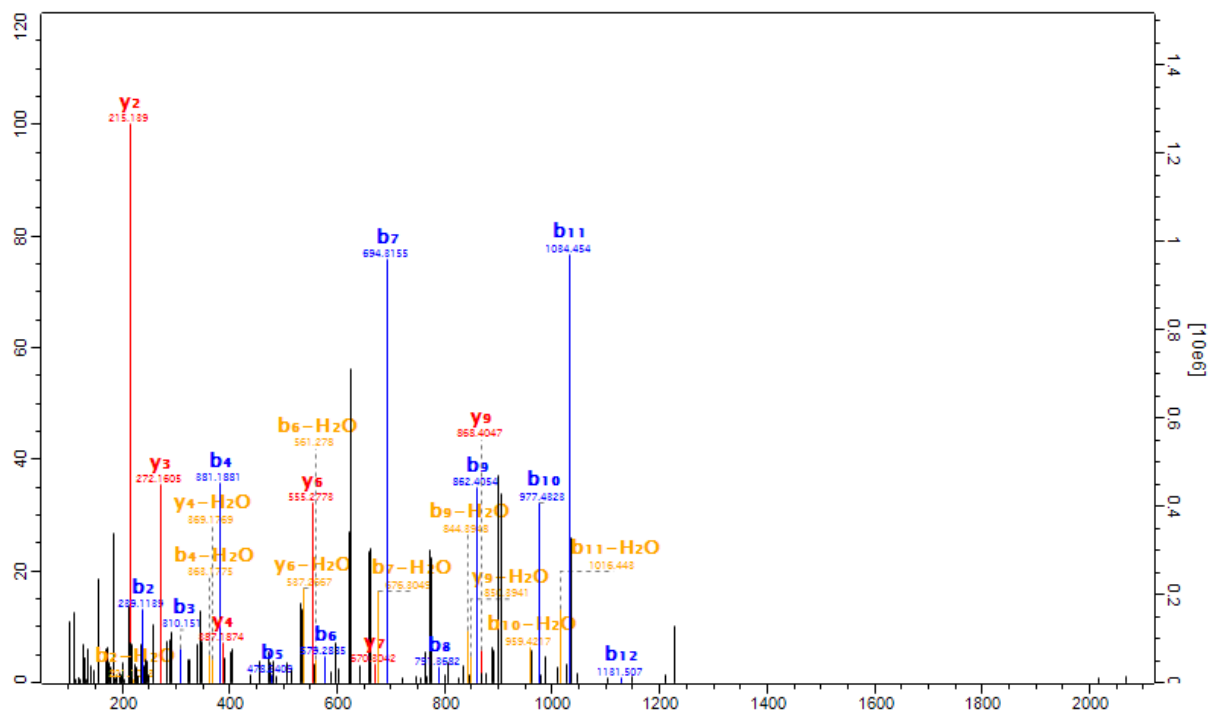

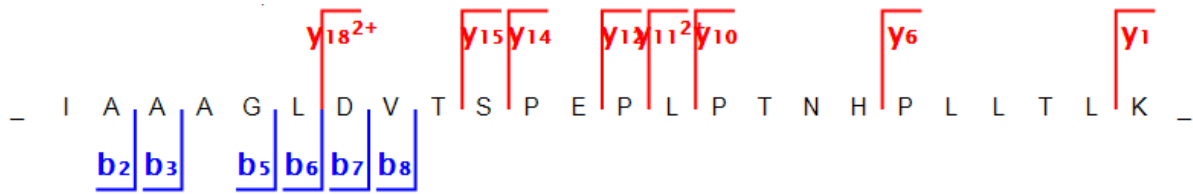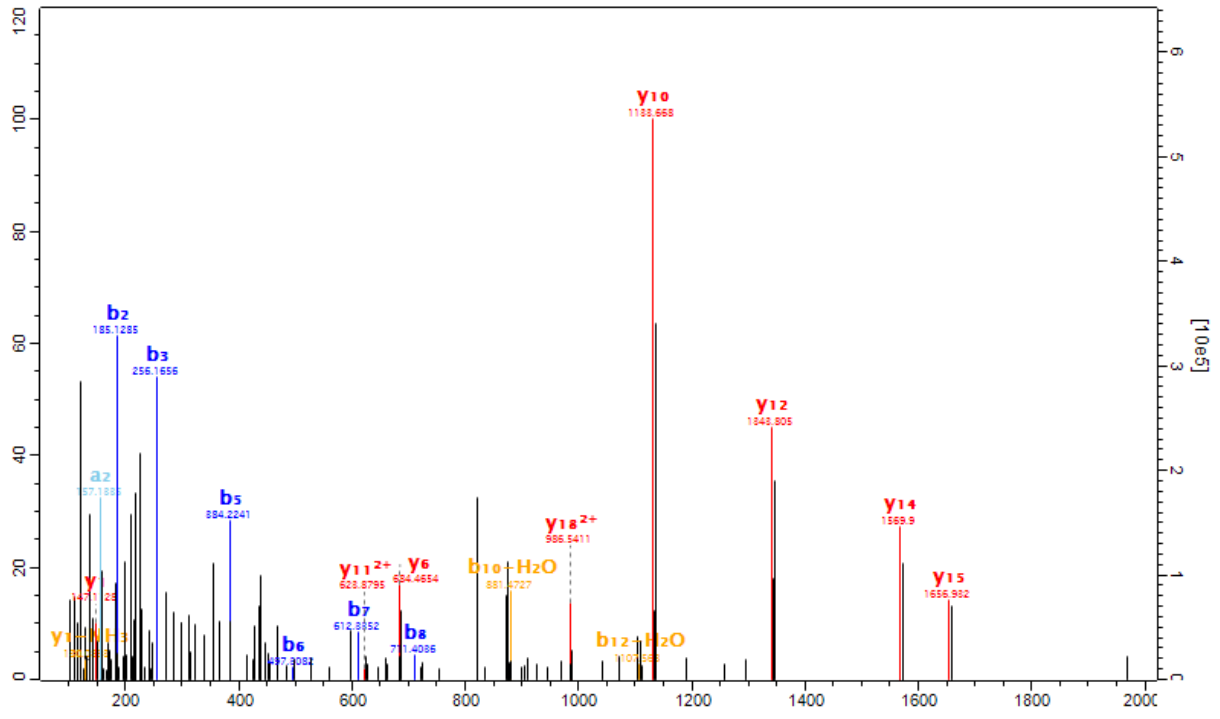



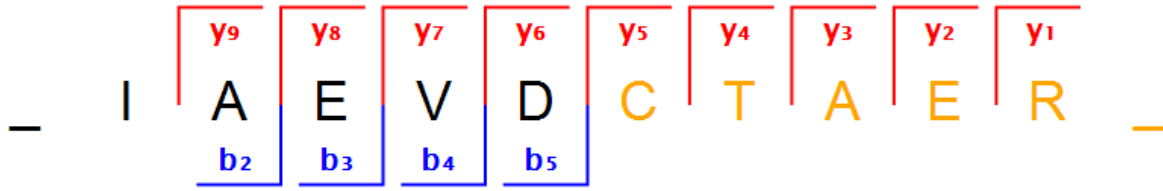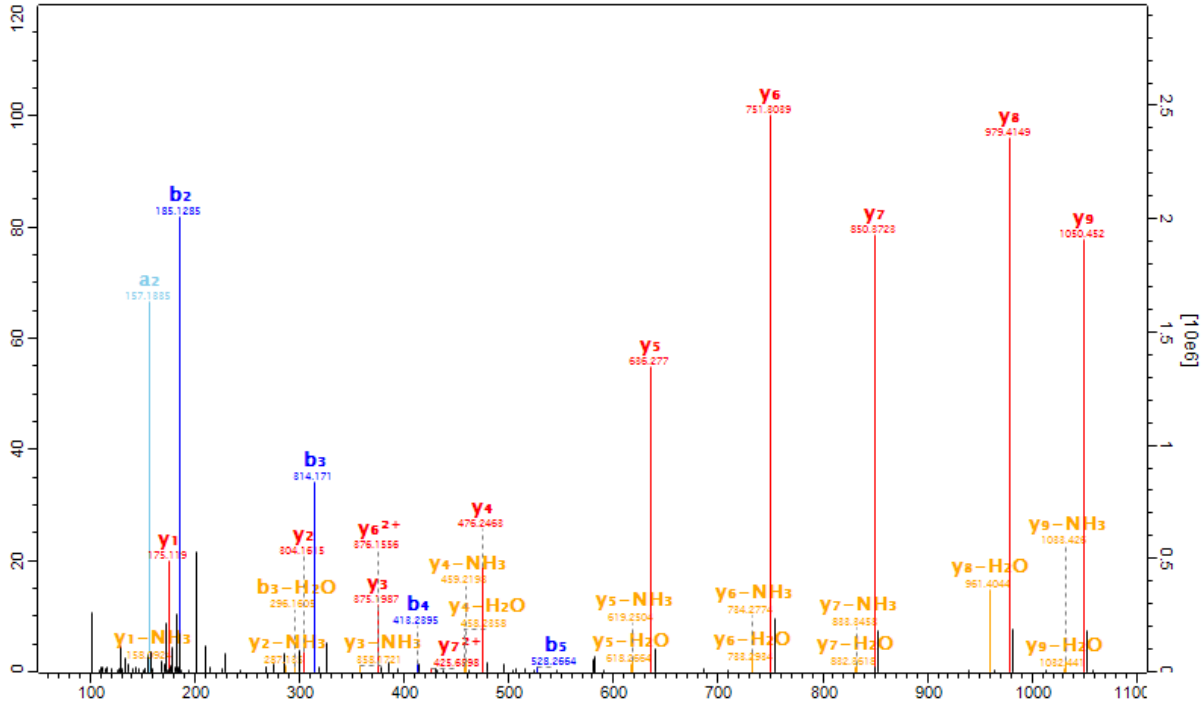

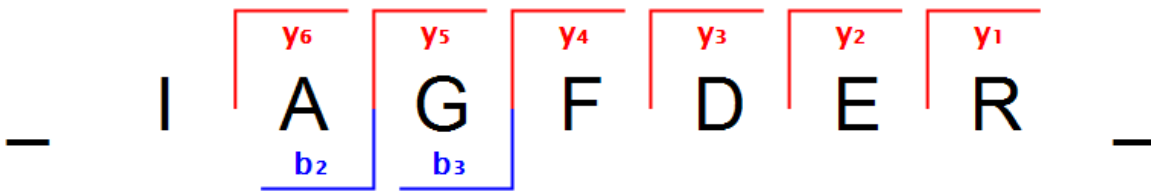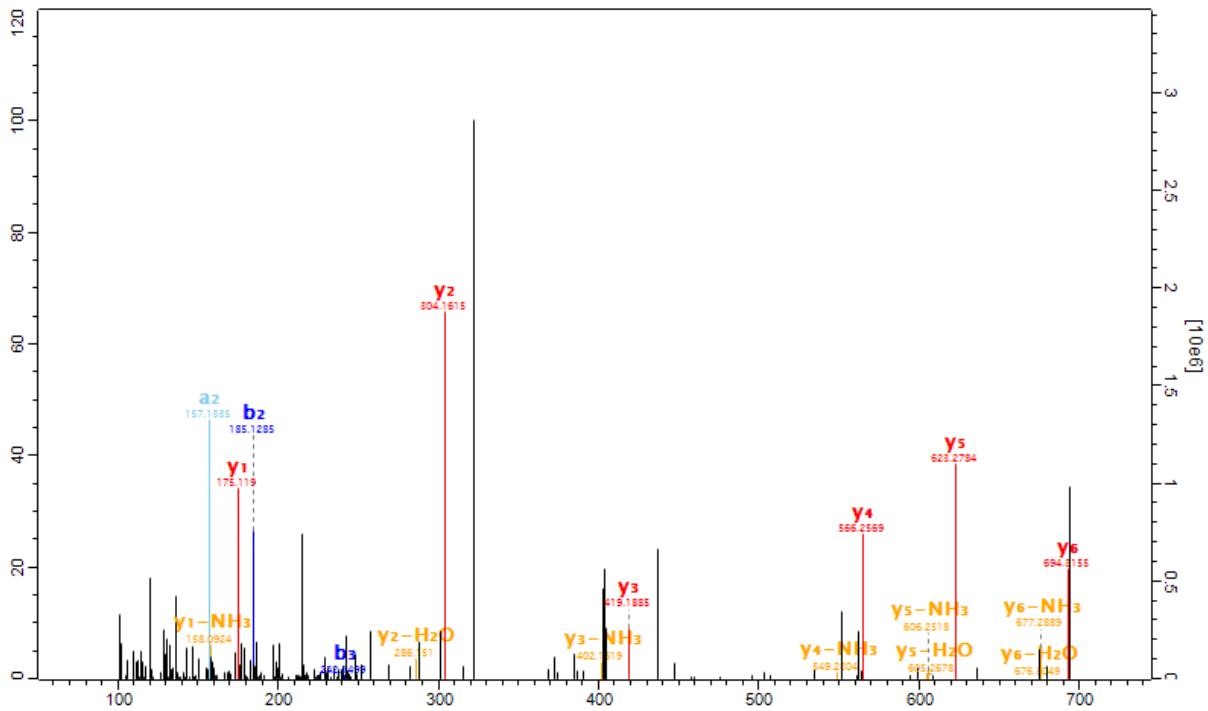

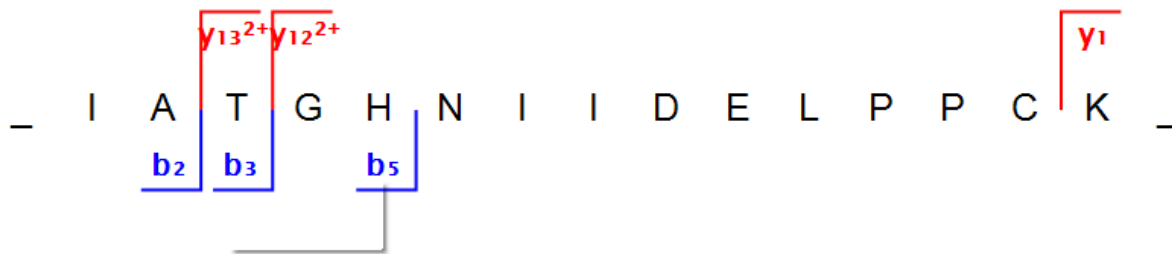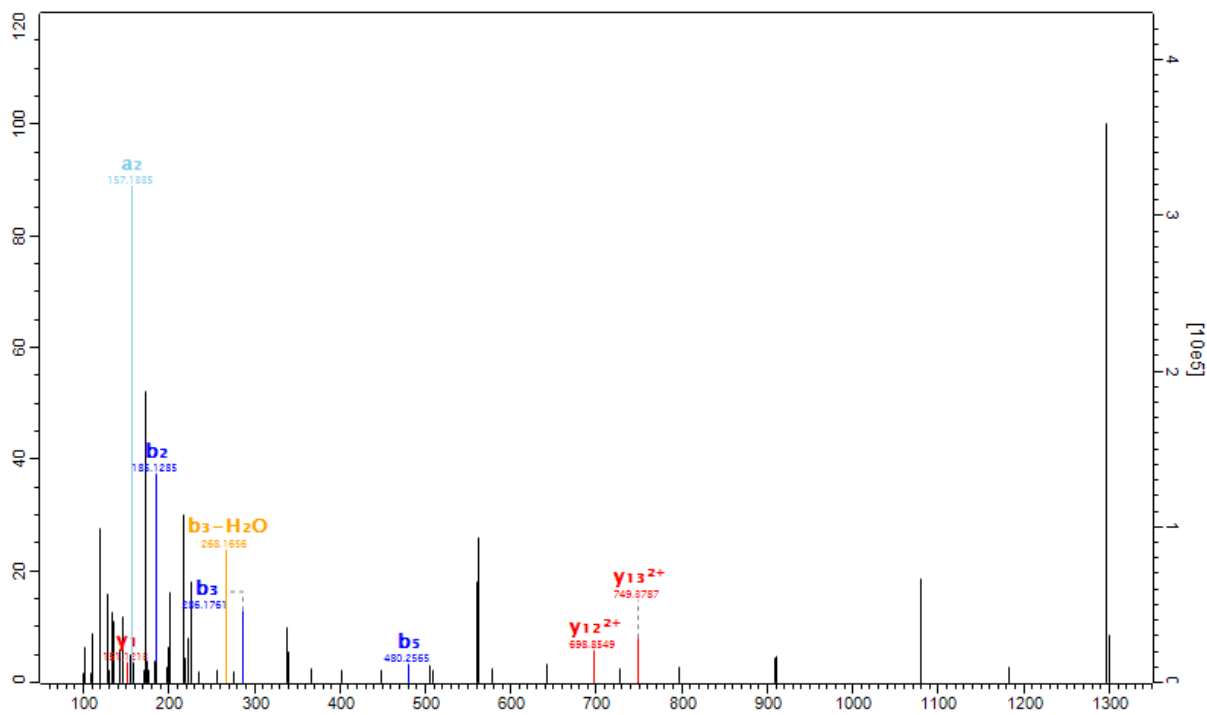

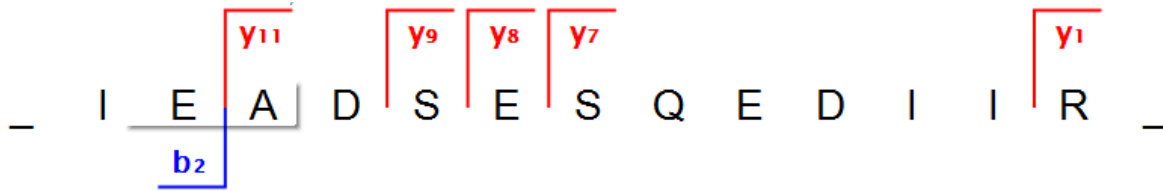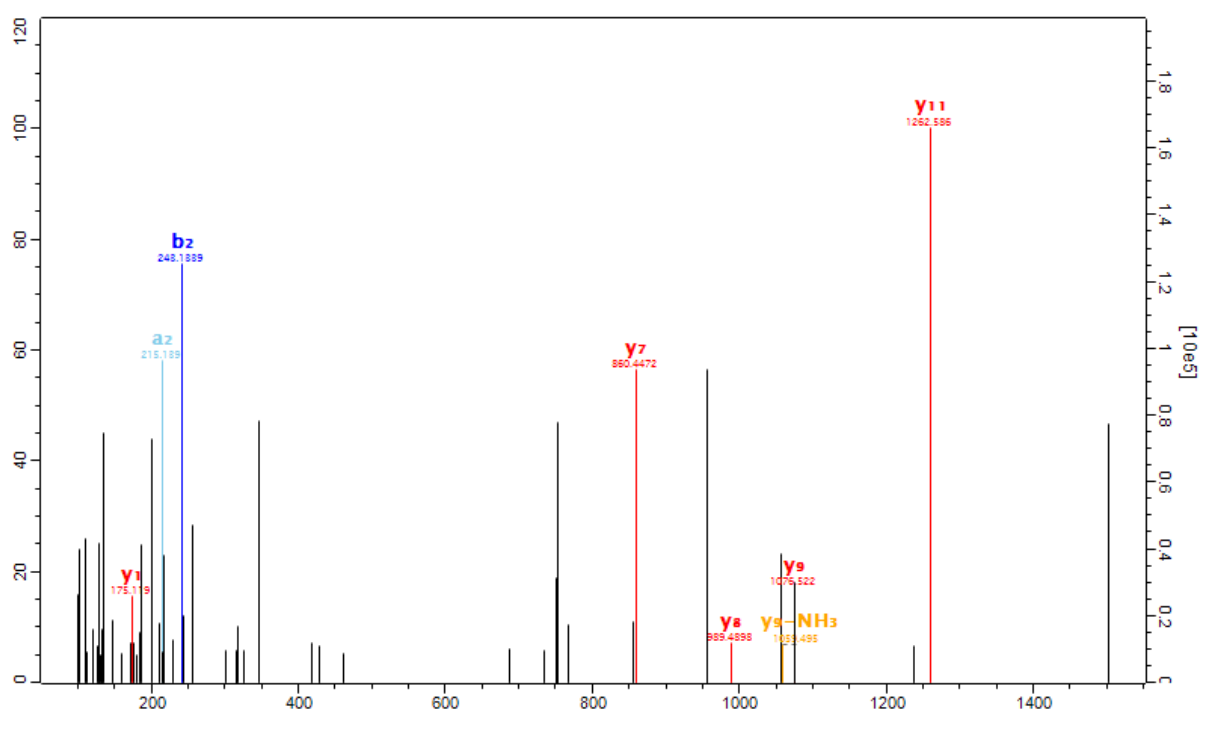

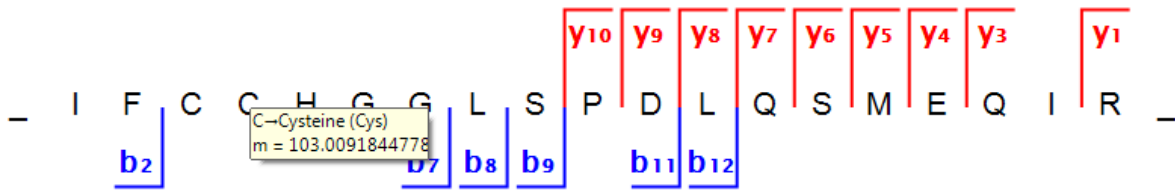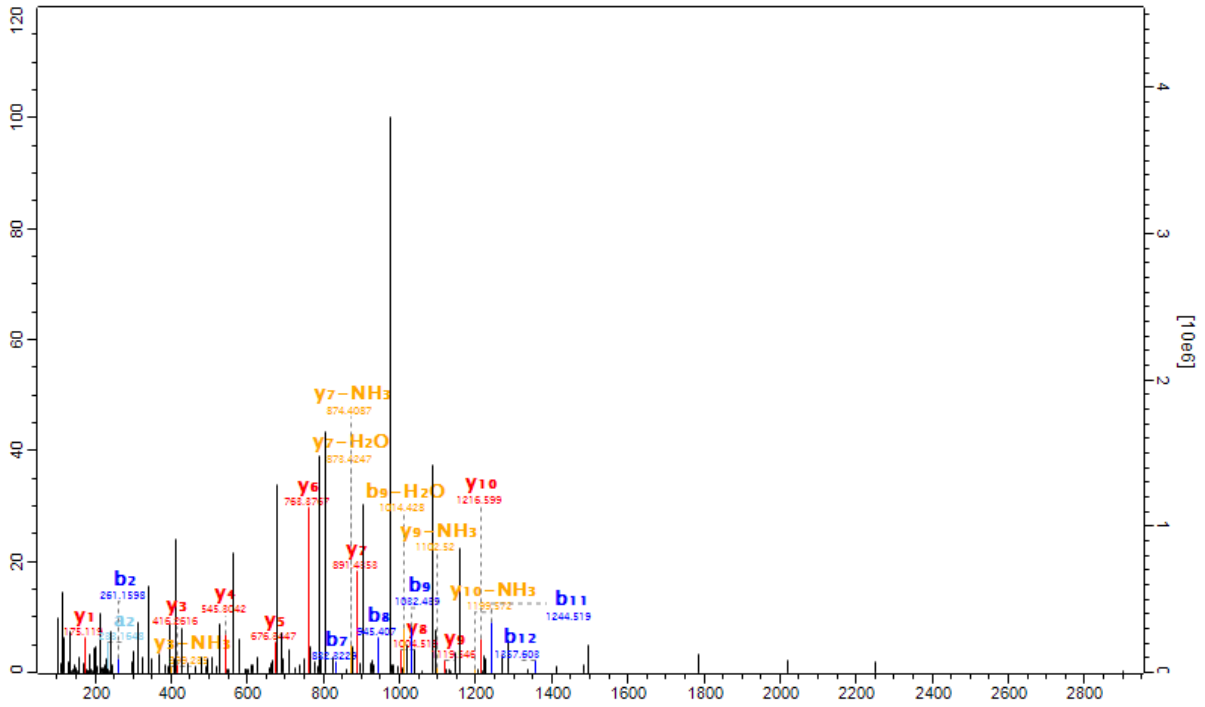

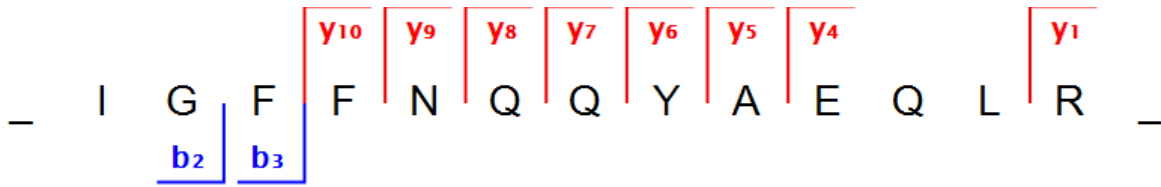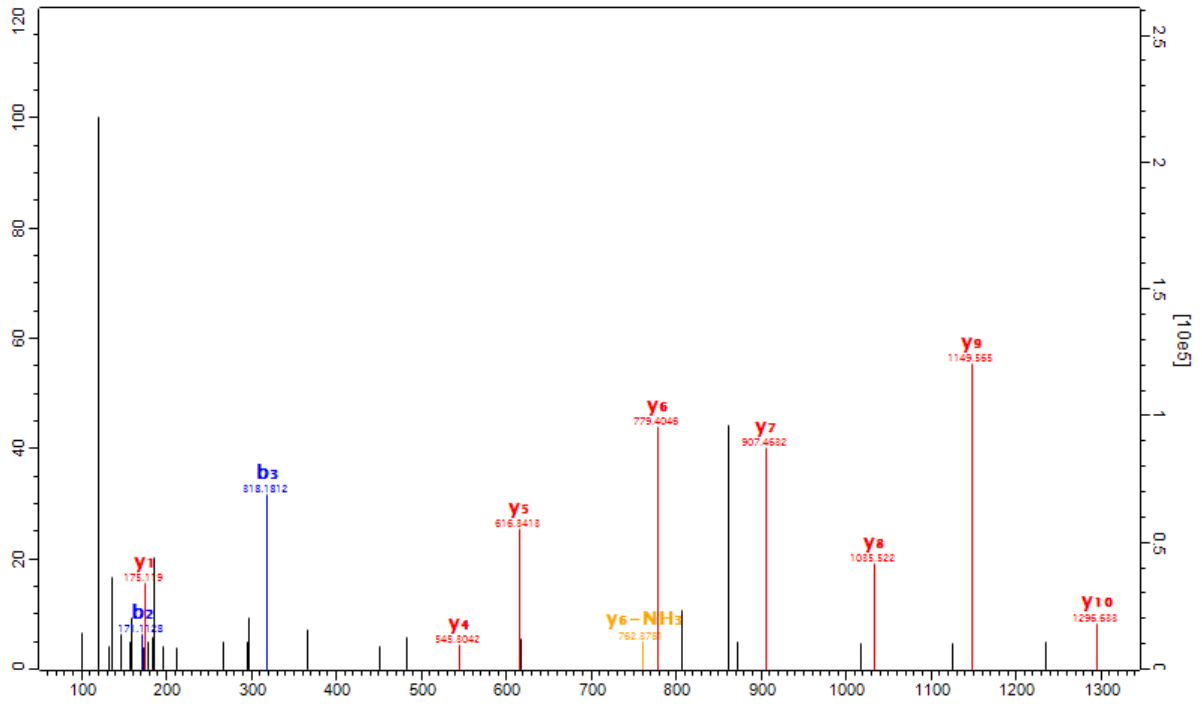

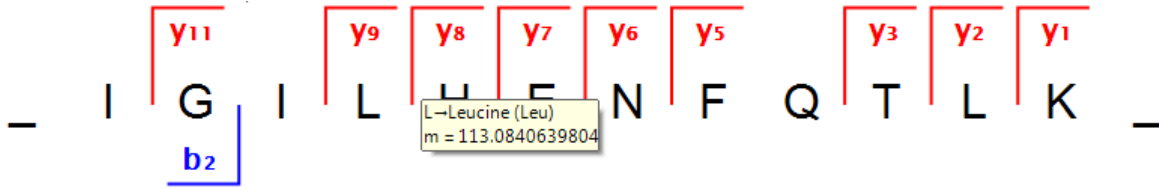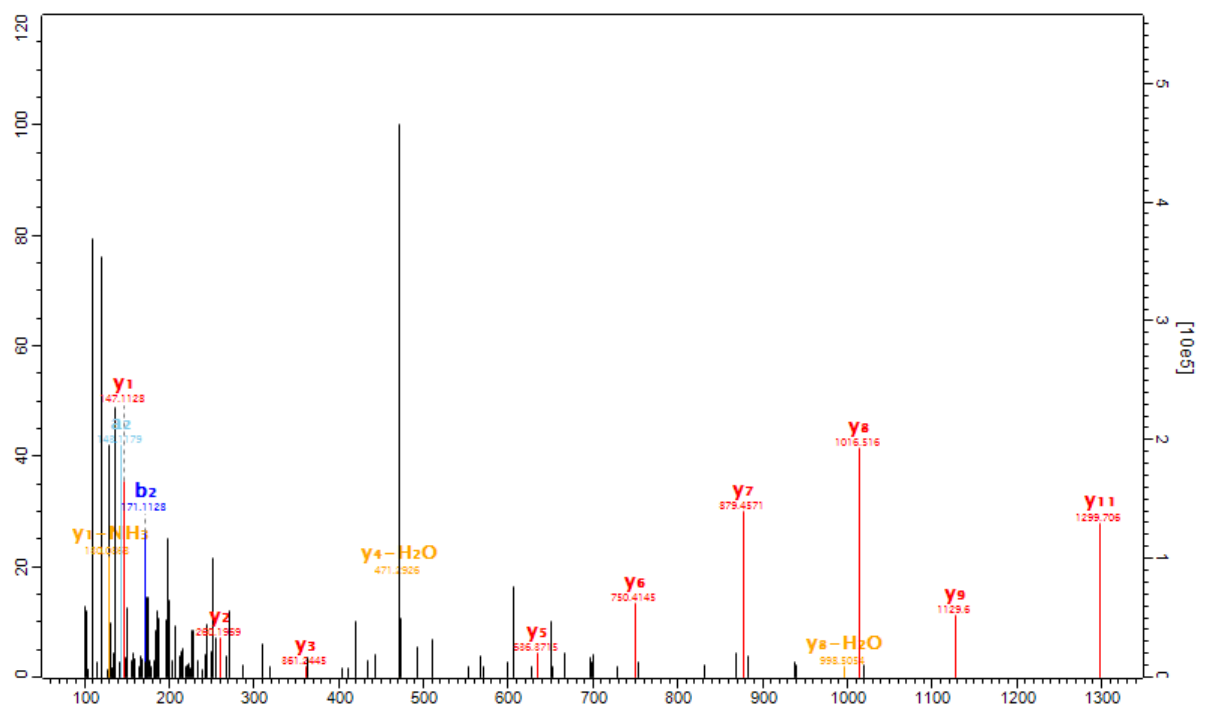

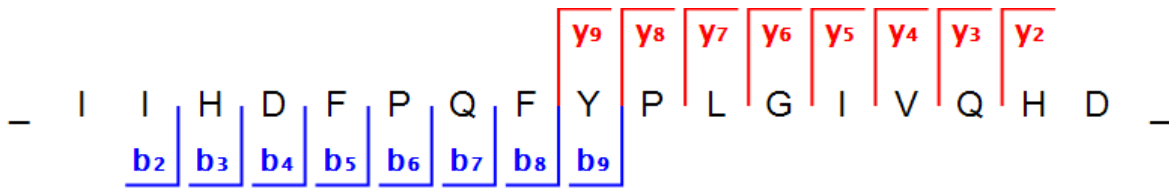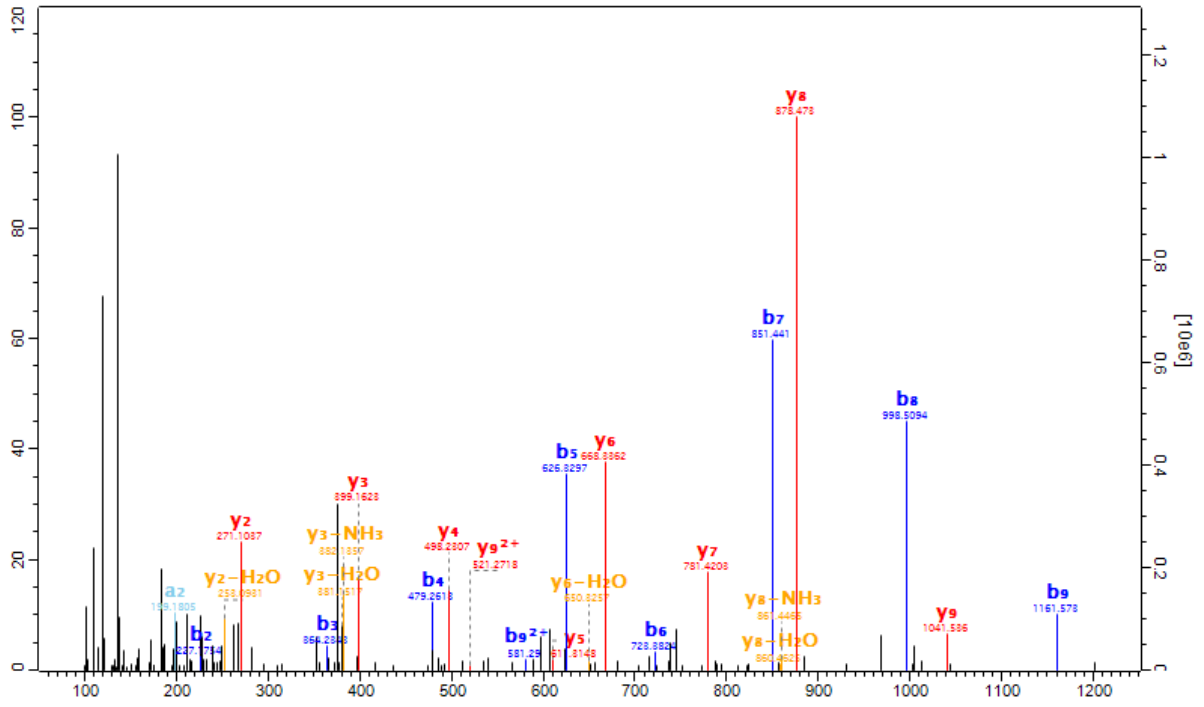



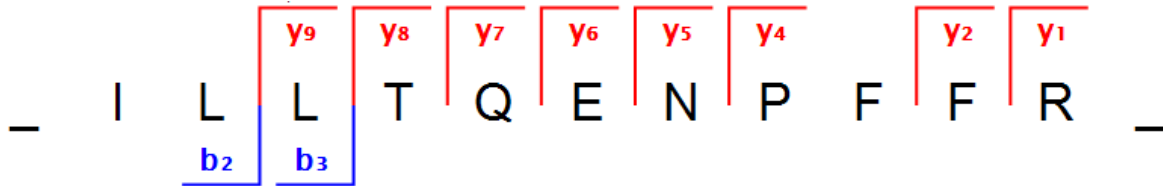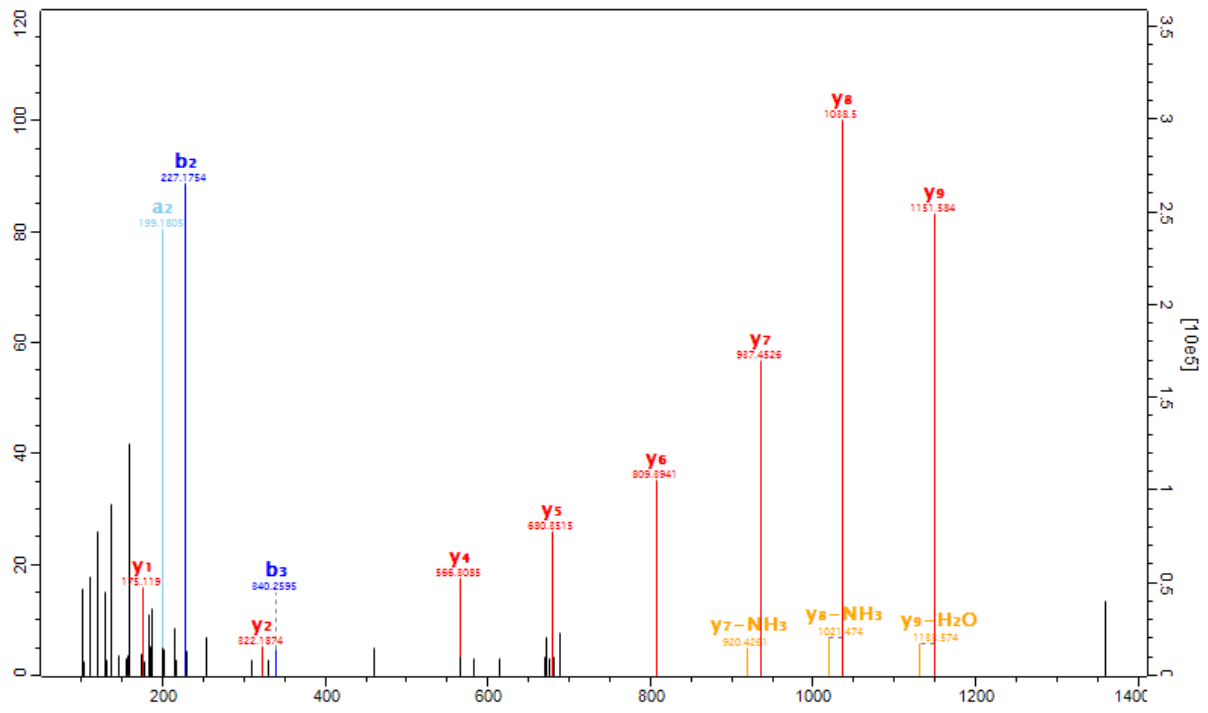

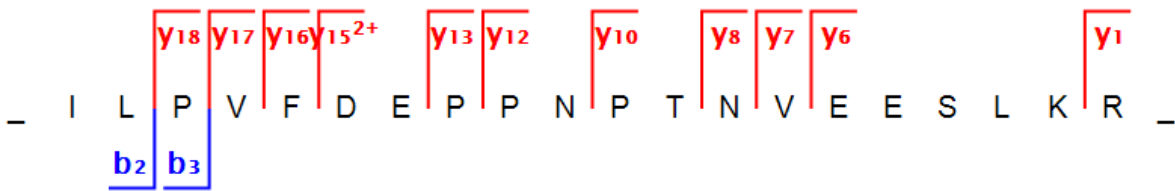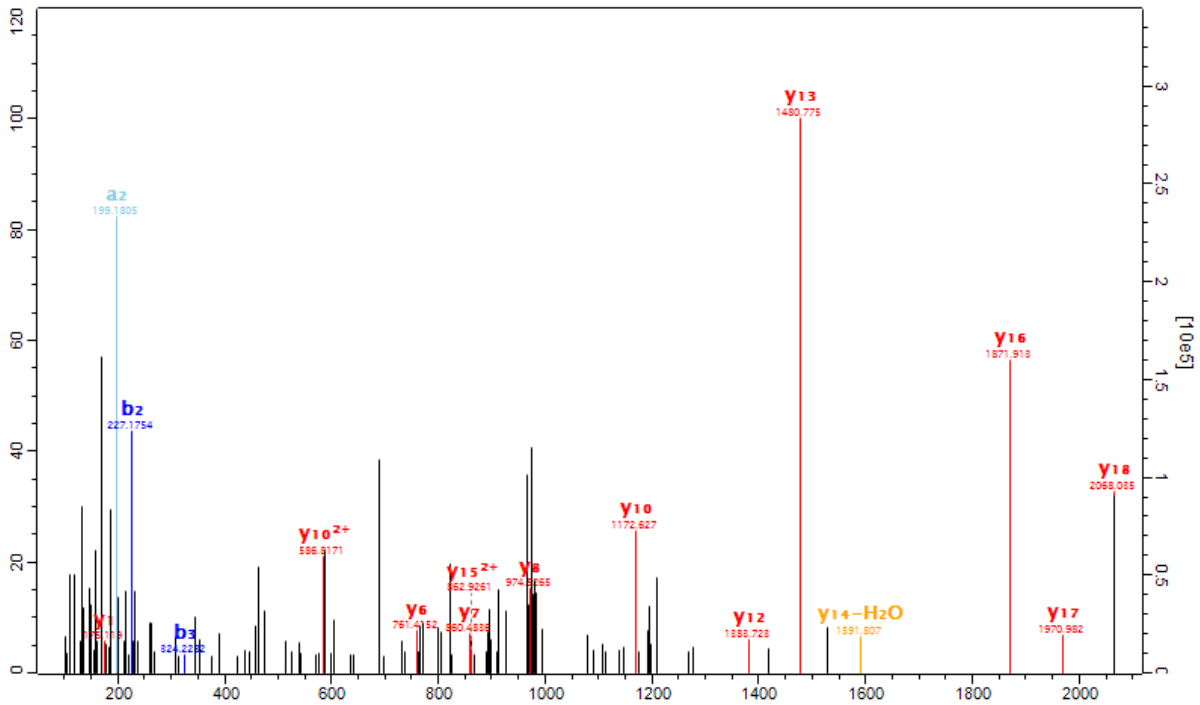

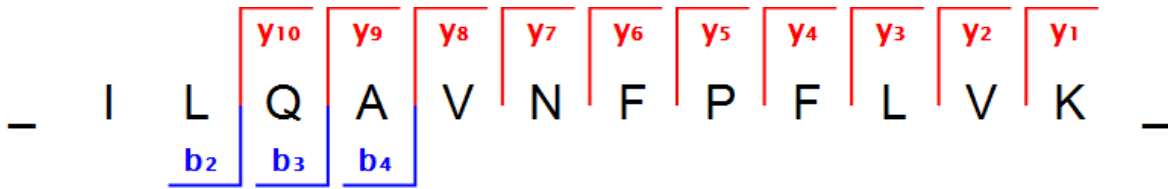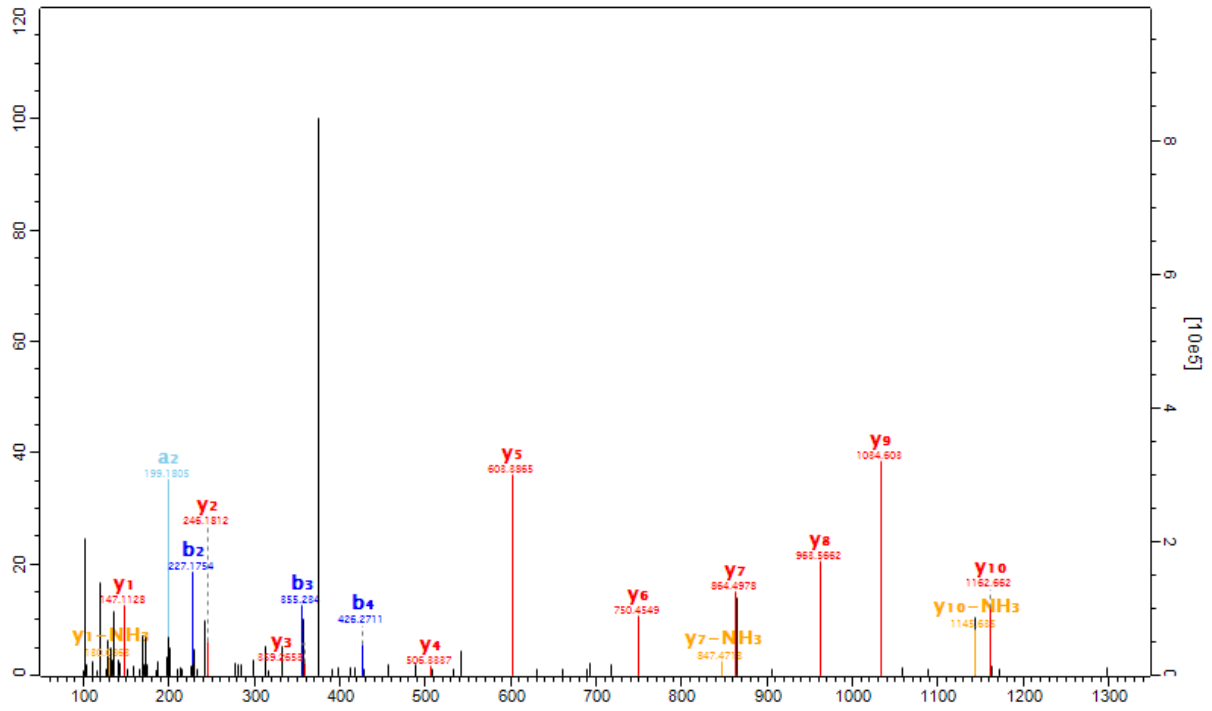

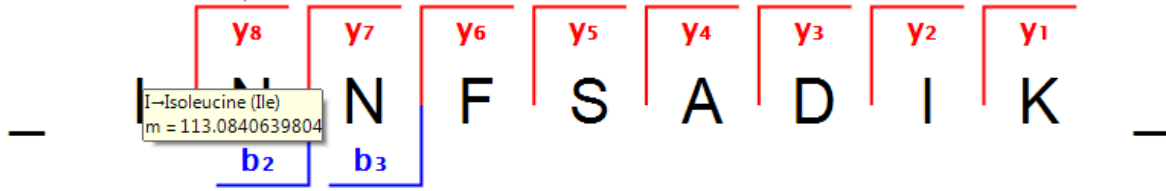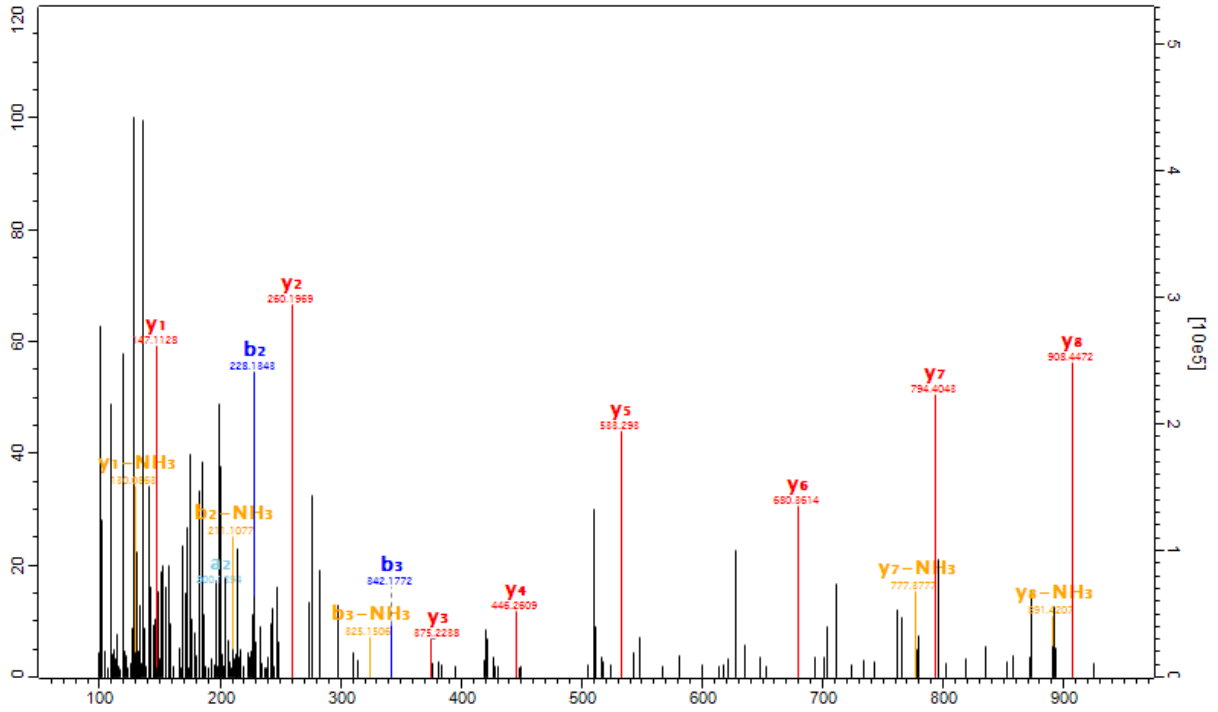

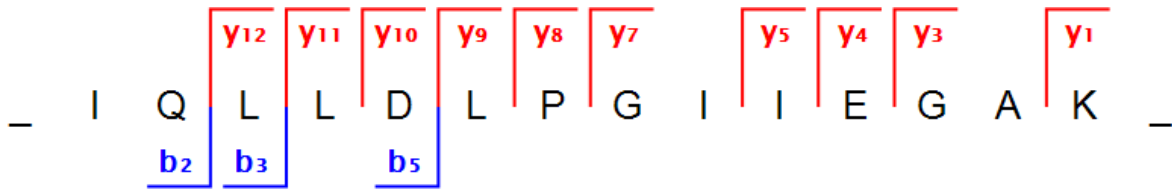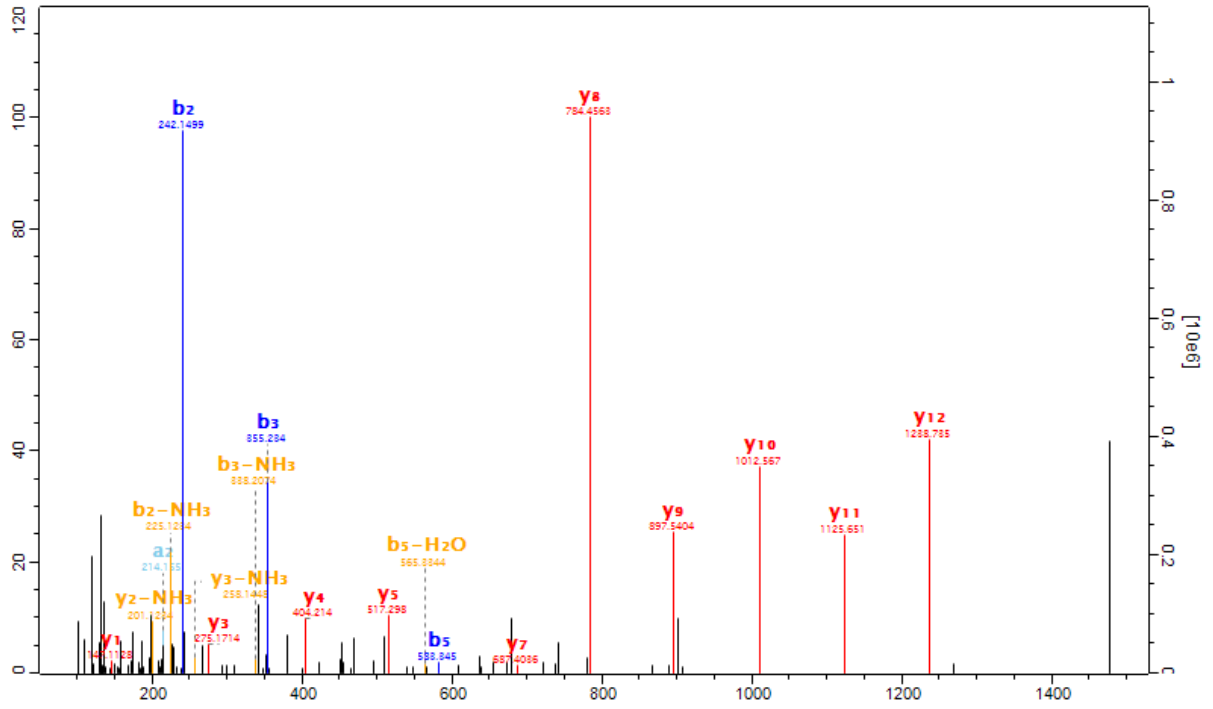

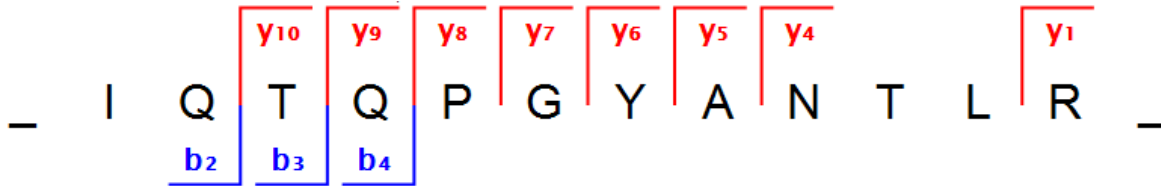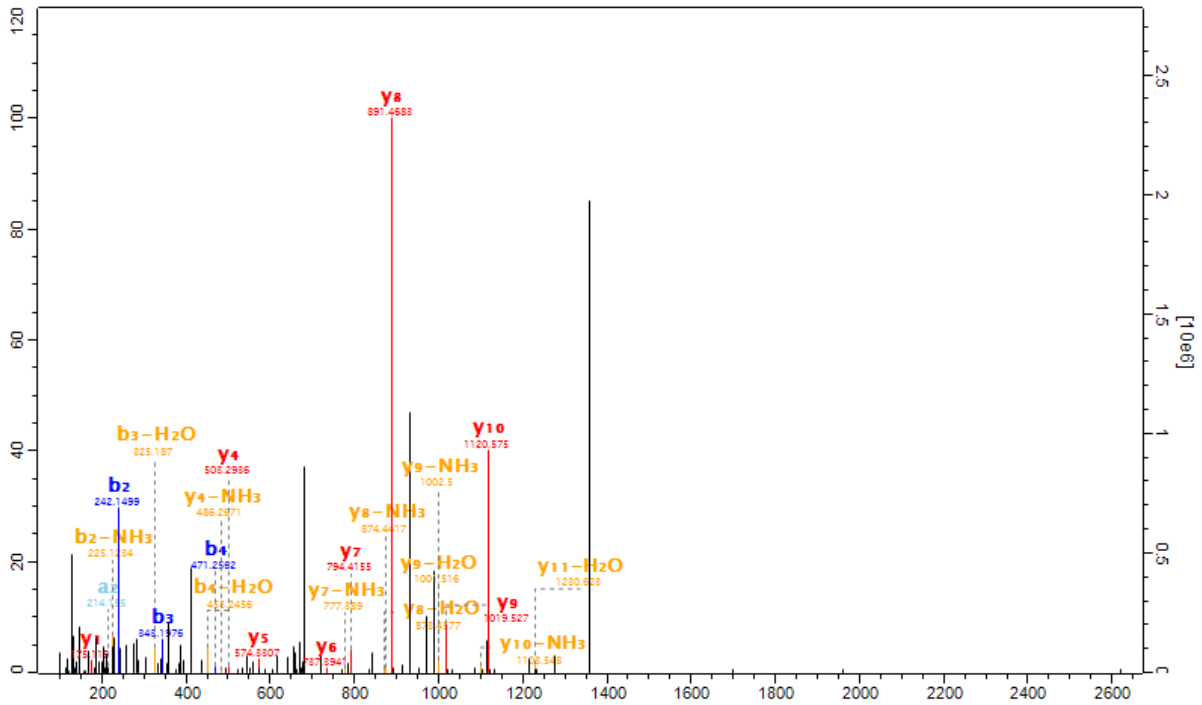

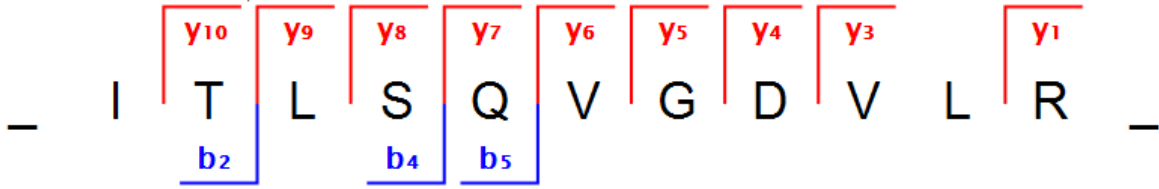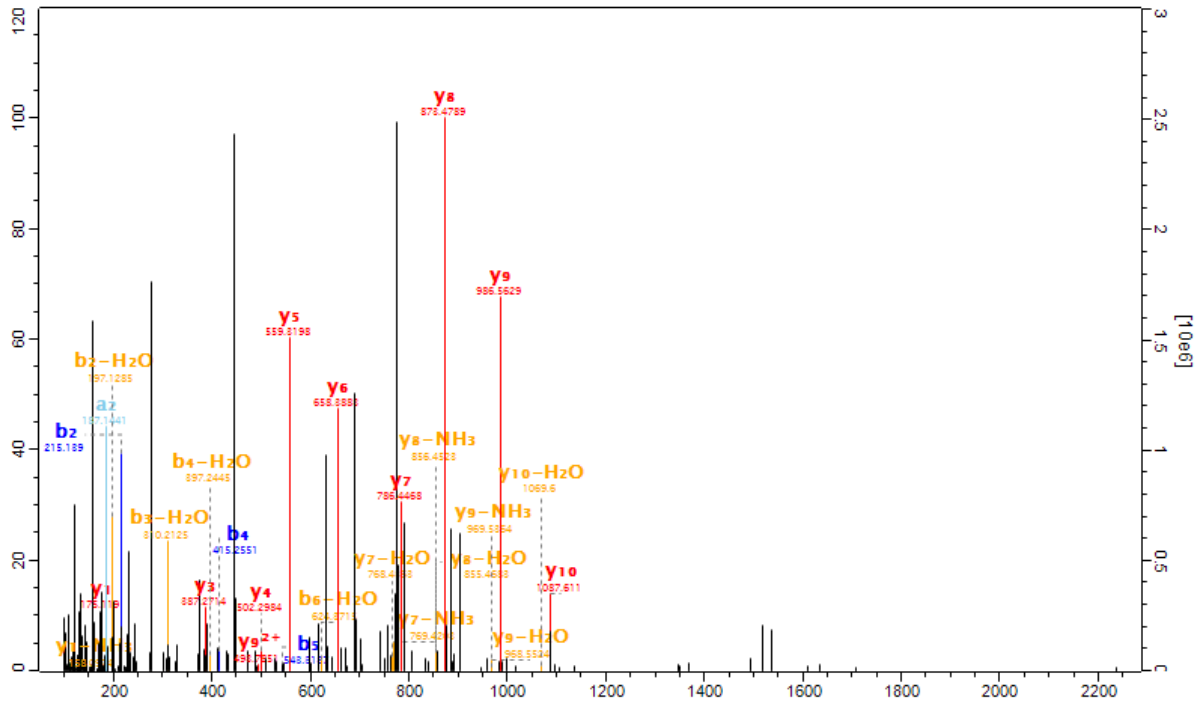

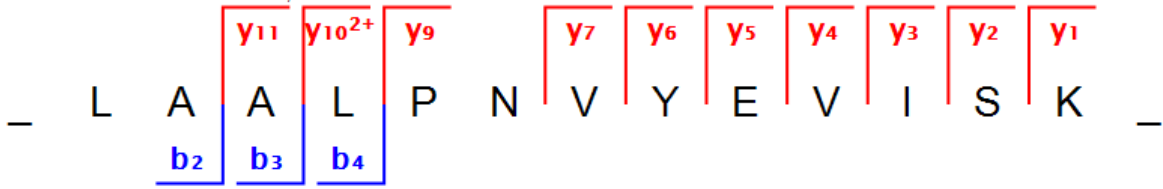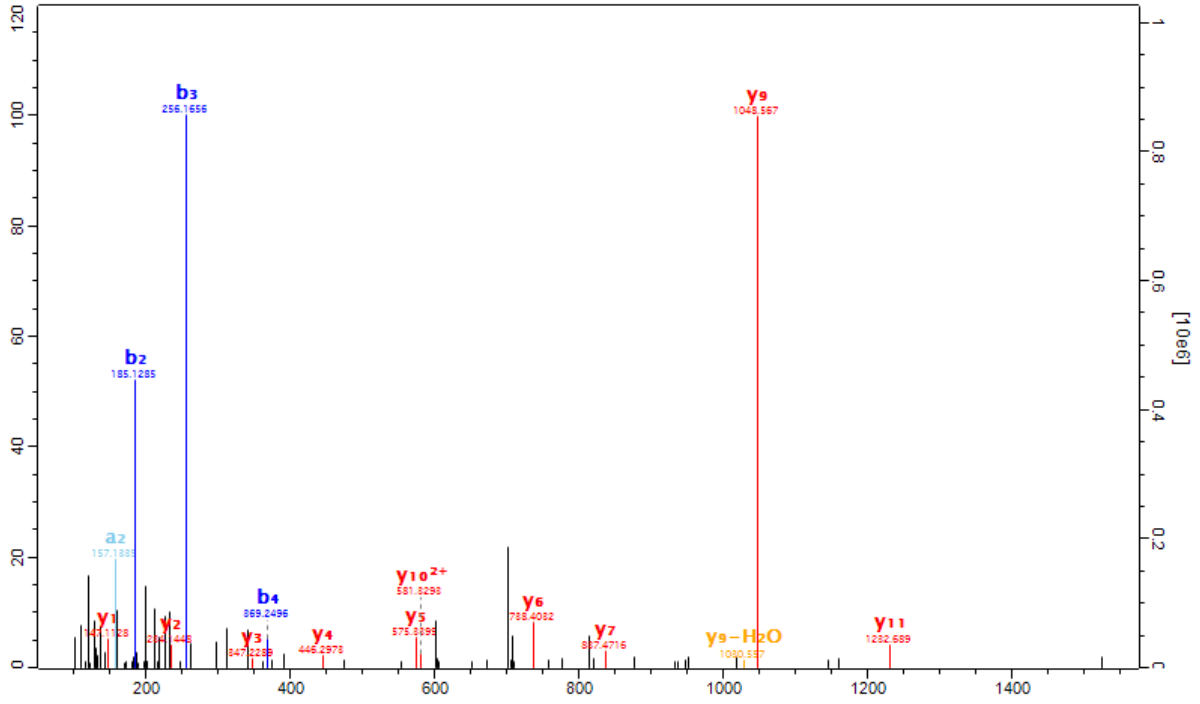



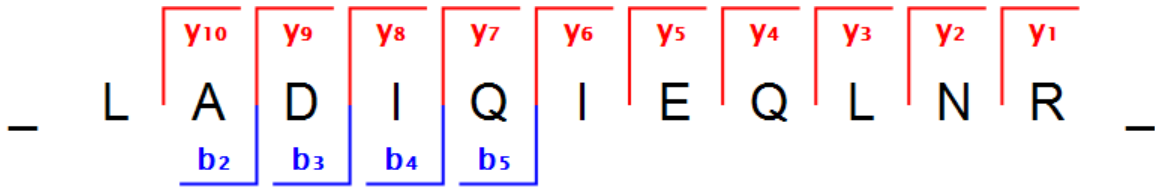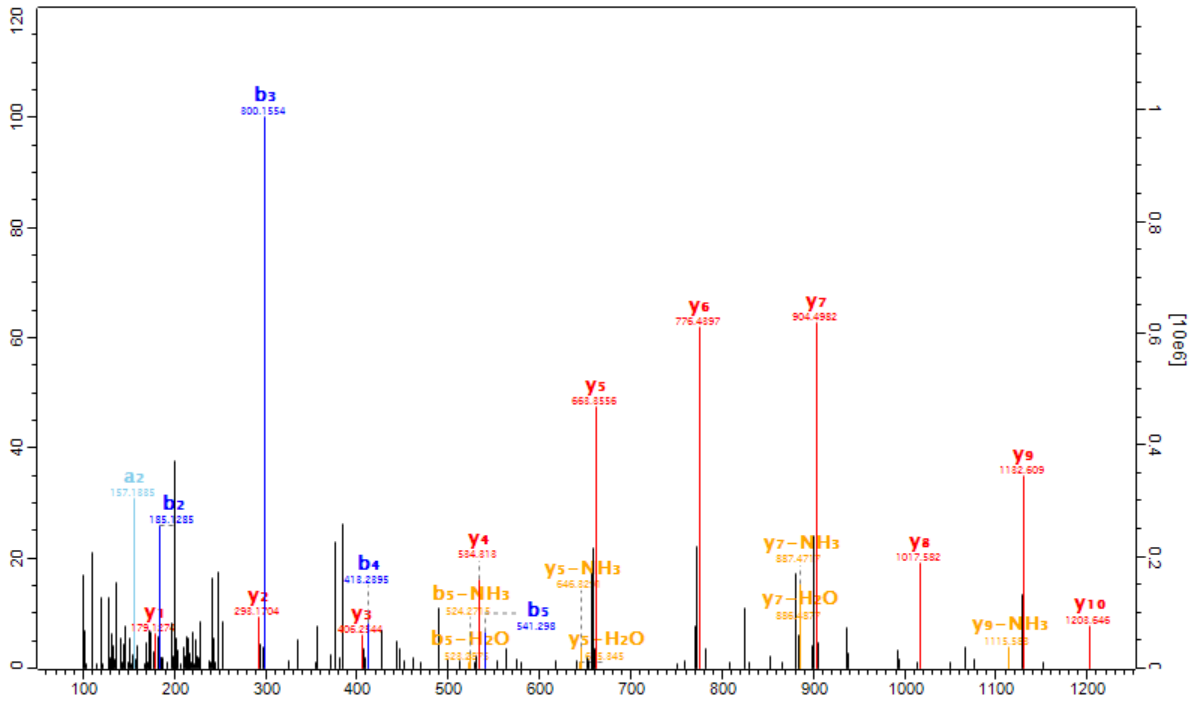

\_ L A G A N P A V I T C D E L L L G H E K \_  
 [b2] [b3] [b5] [b8] [y15] [y12] [y11] [y10] [y9] [y8] [y7] [y6] [y5] [y4] [y3] [y1]

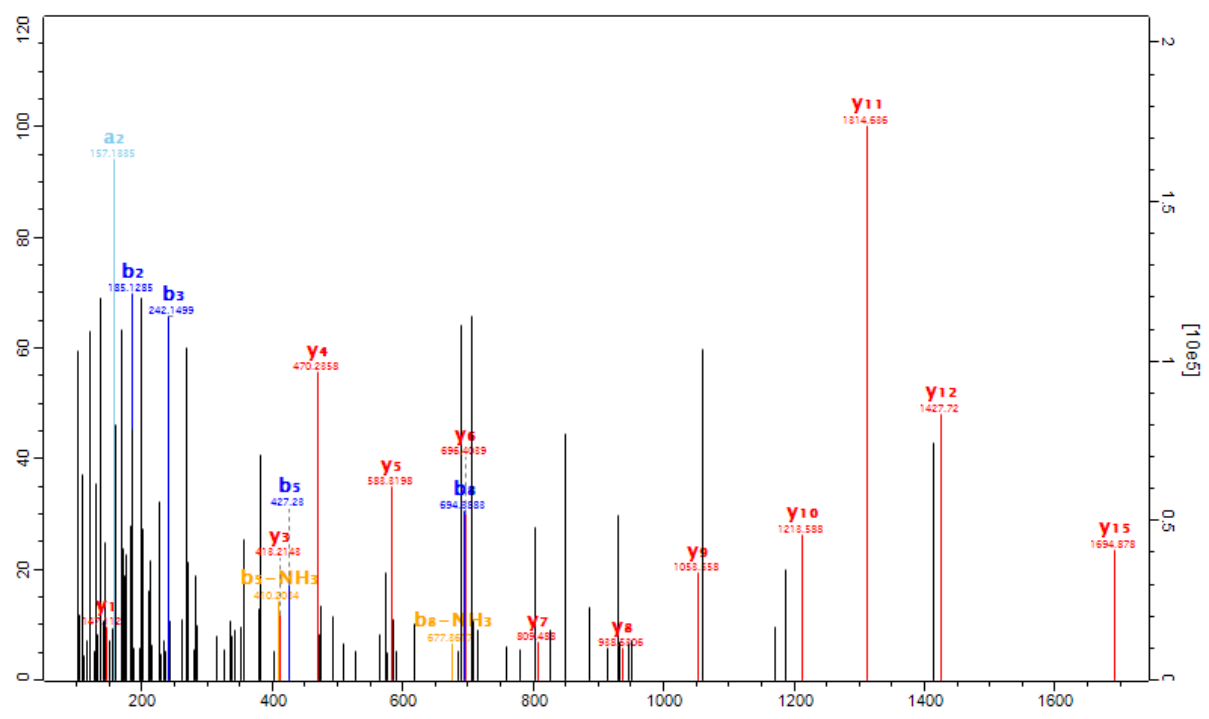

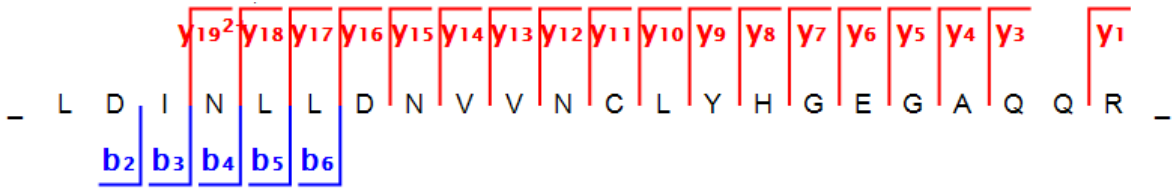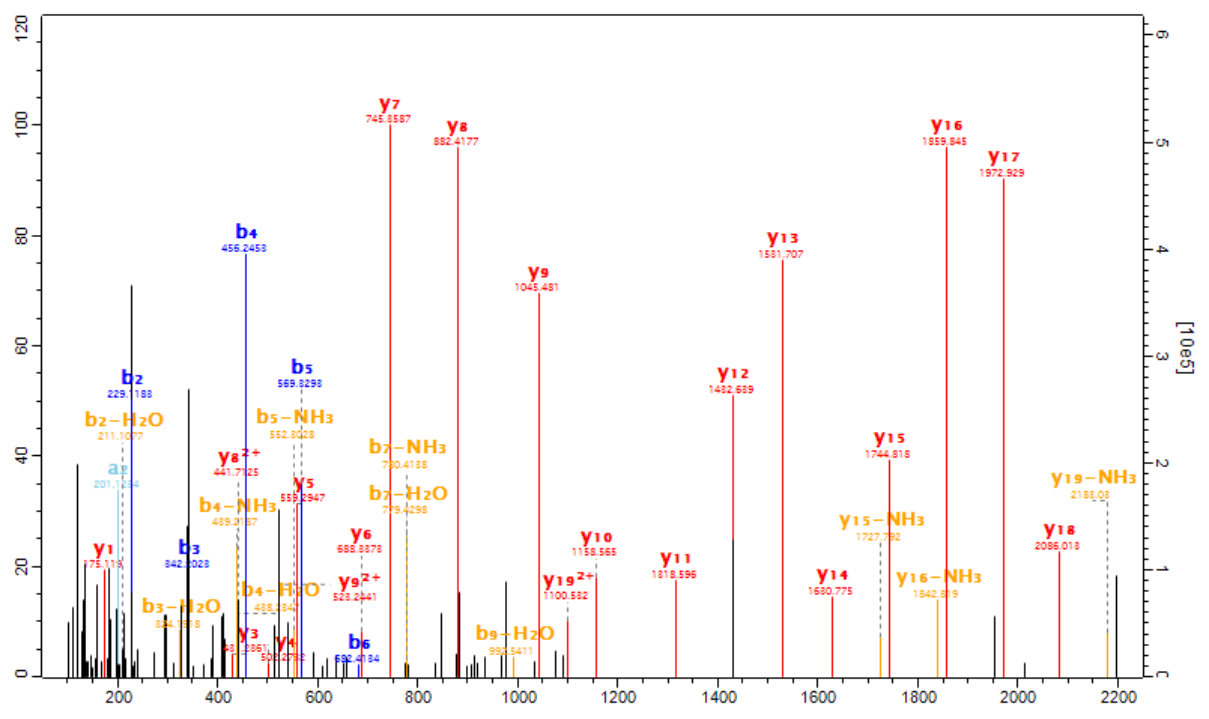

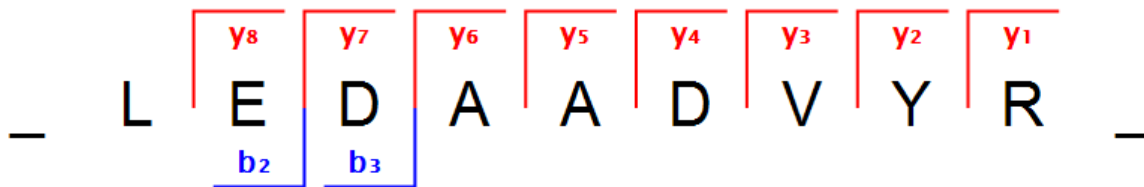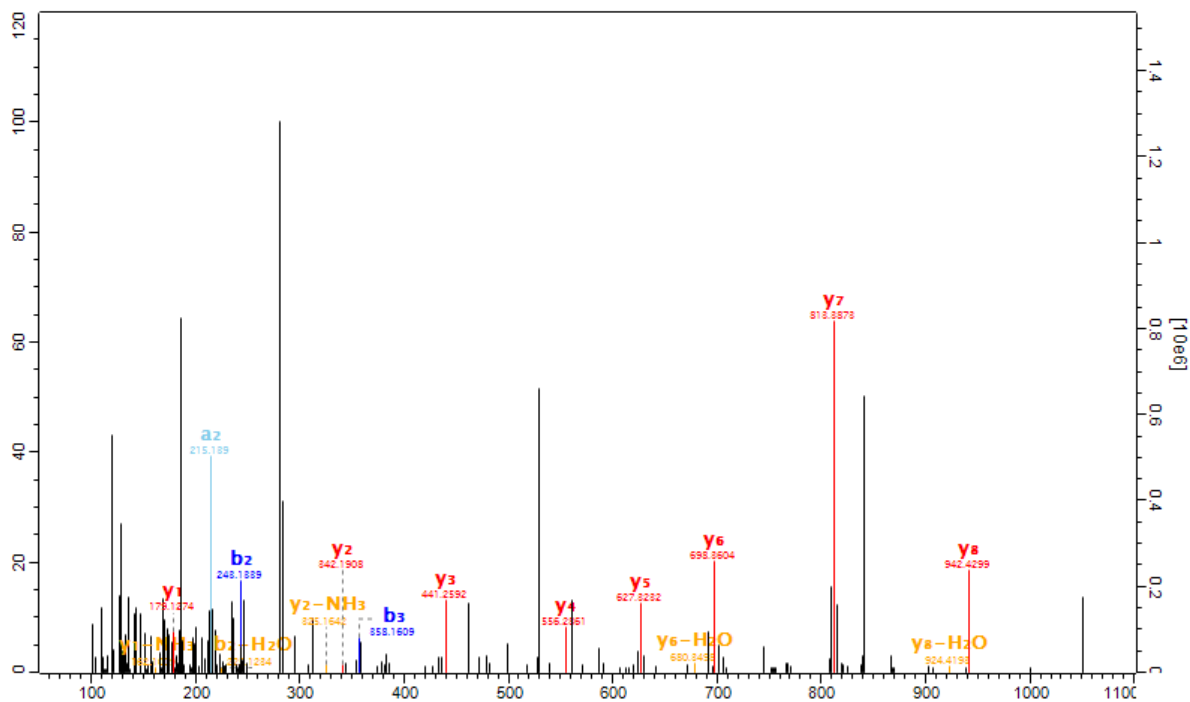

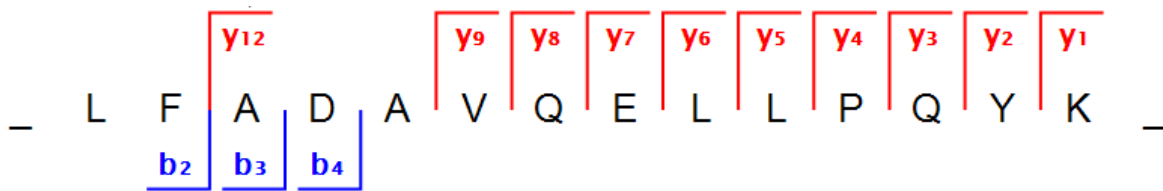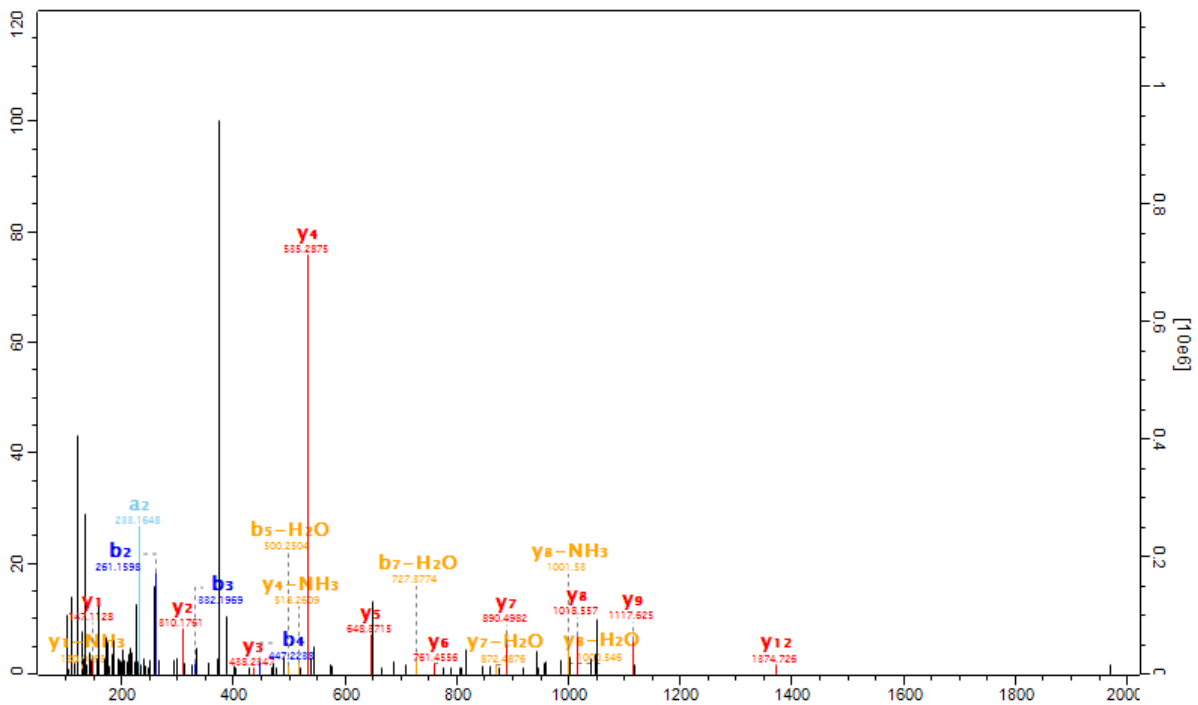

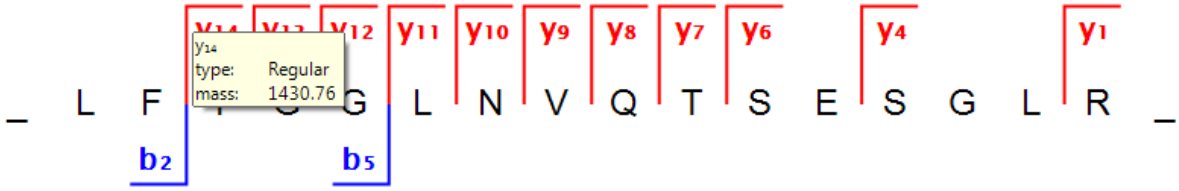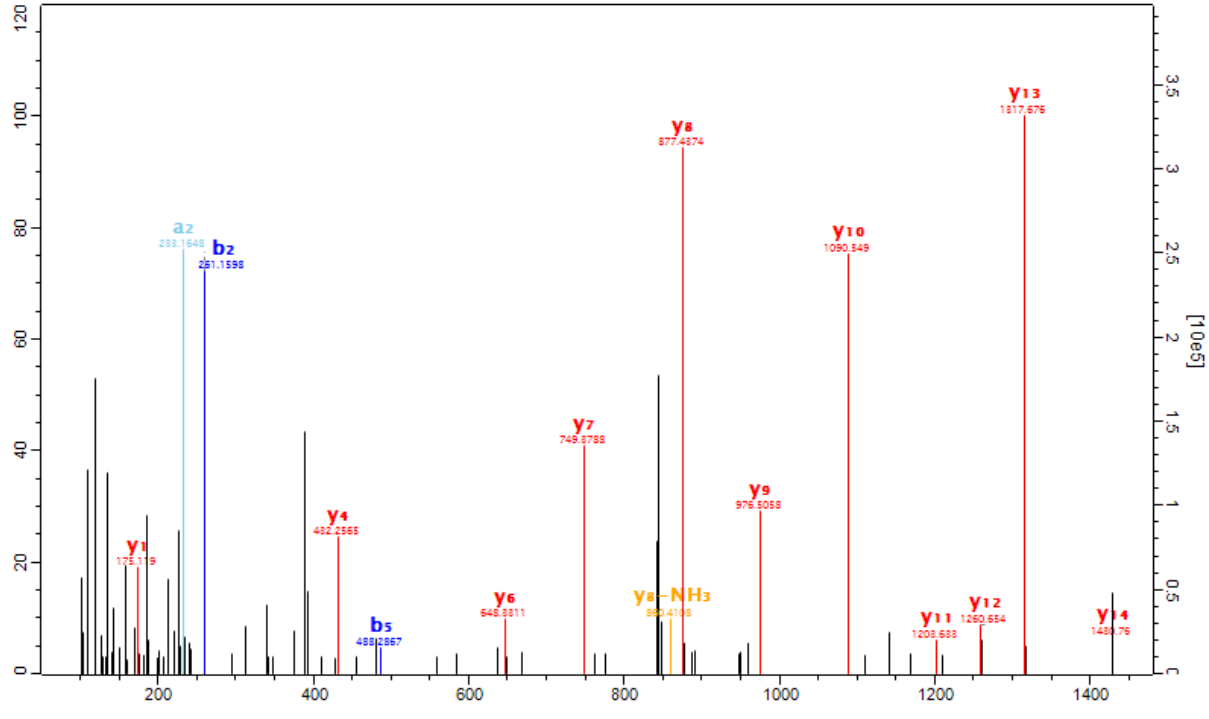

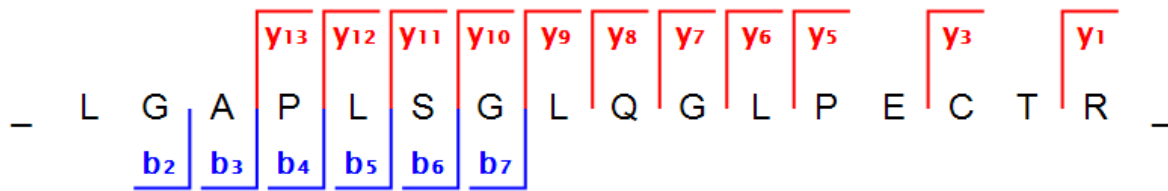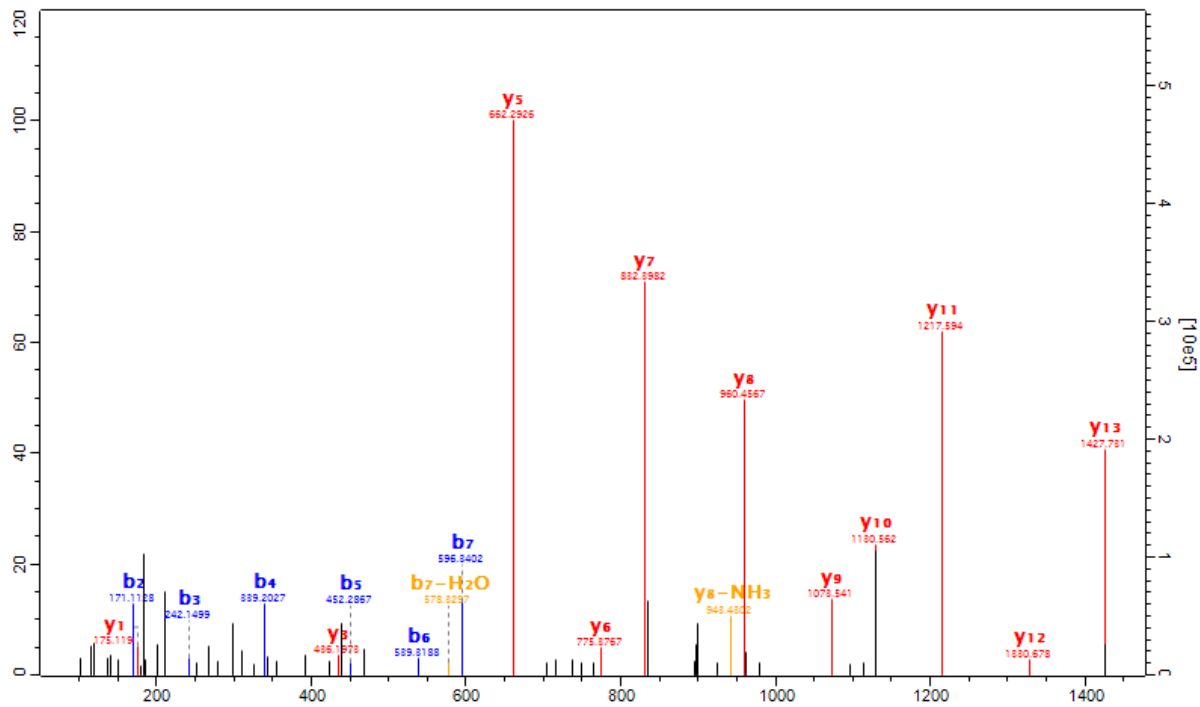

- L L A N Q Q V F H I S C F R -  
 b<sub>2</sub>

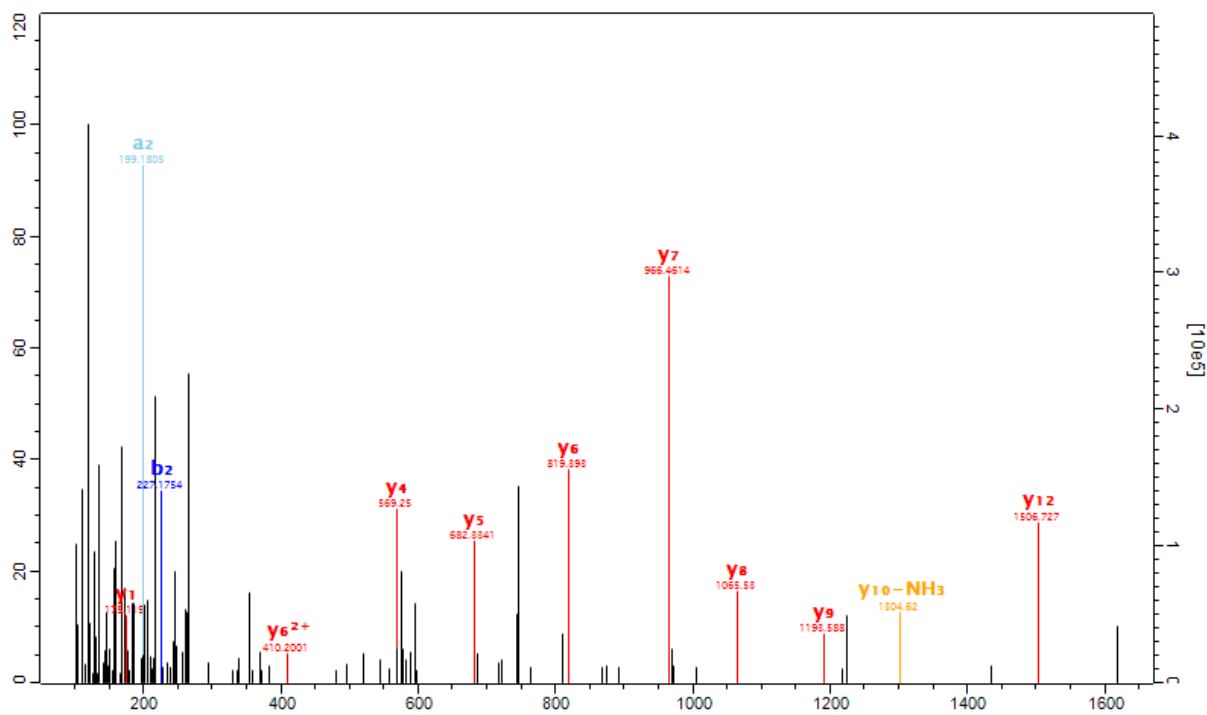



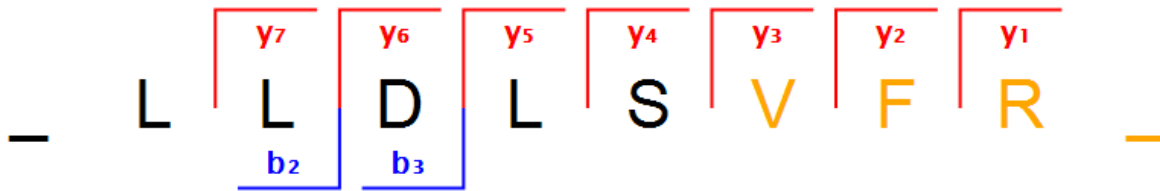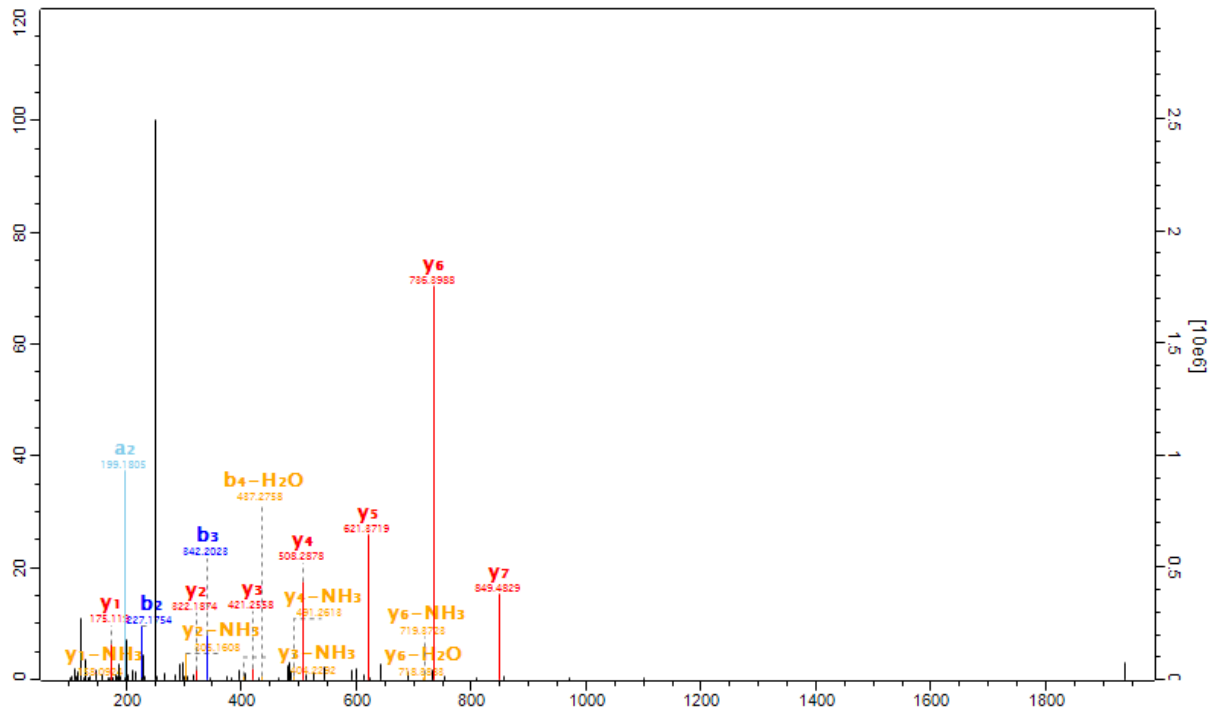

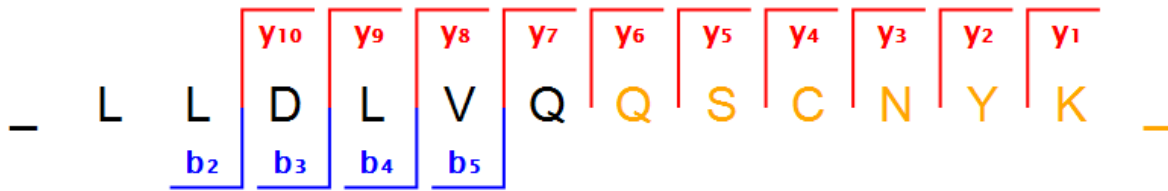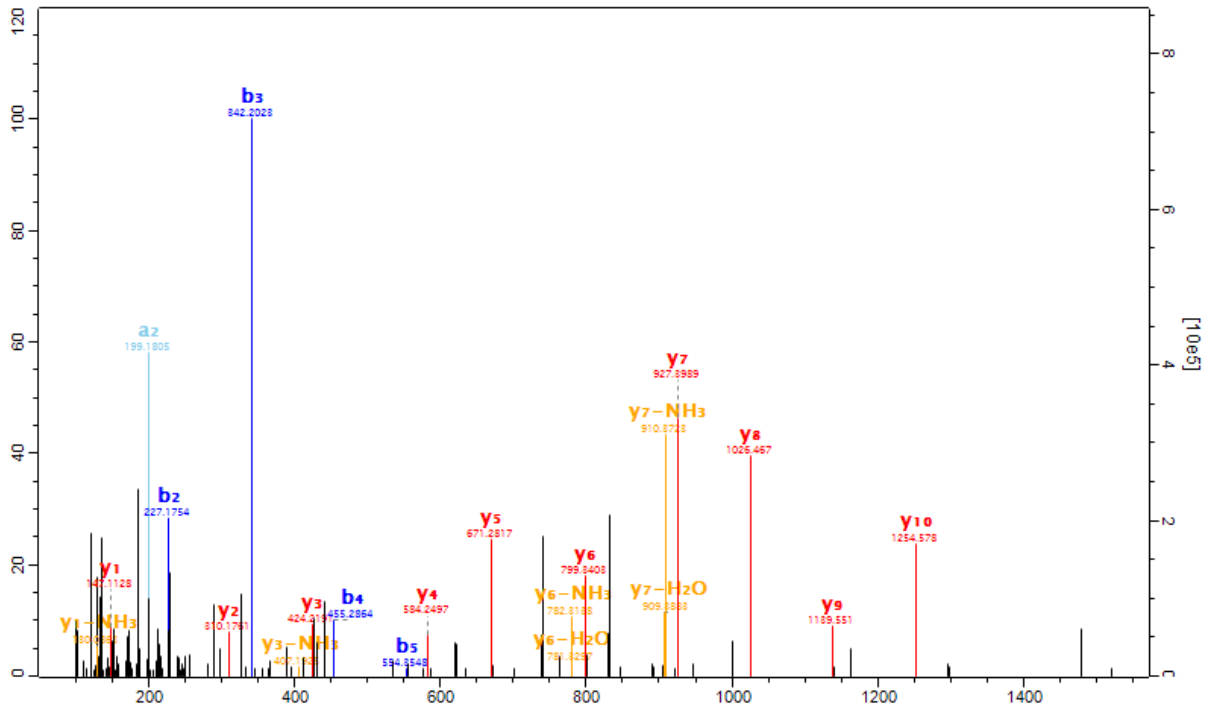

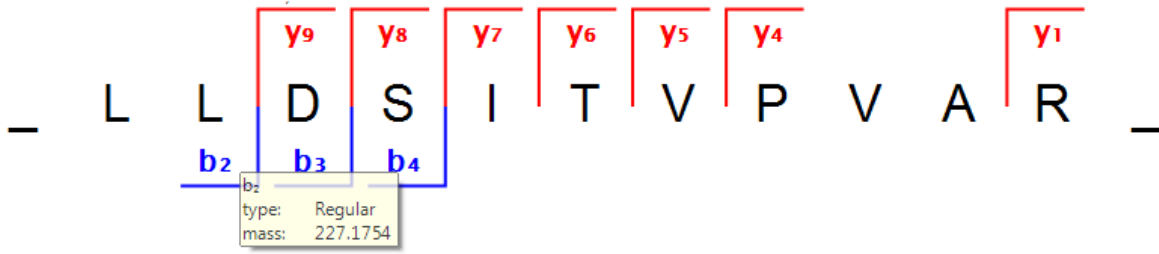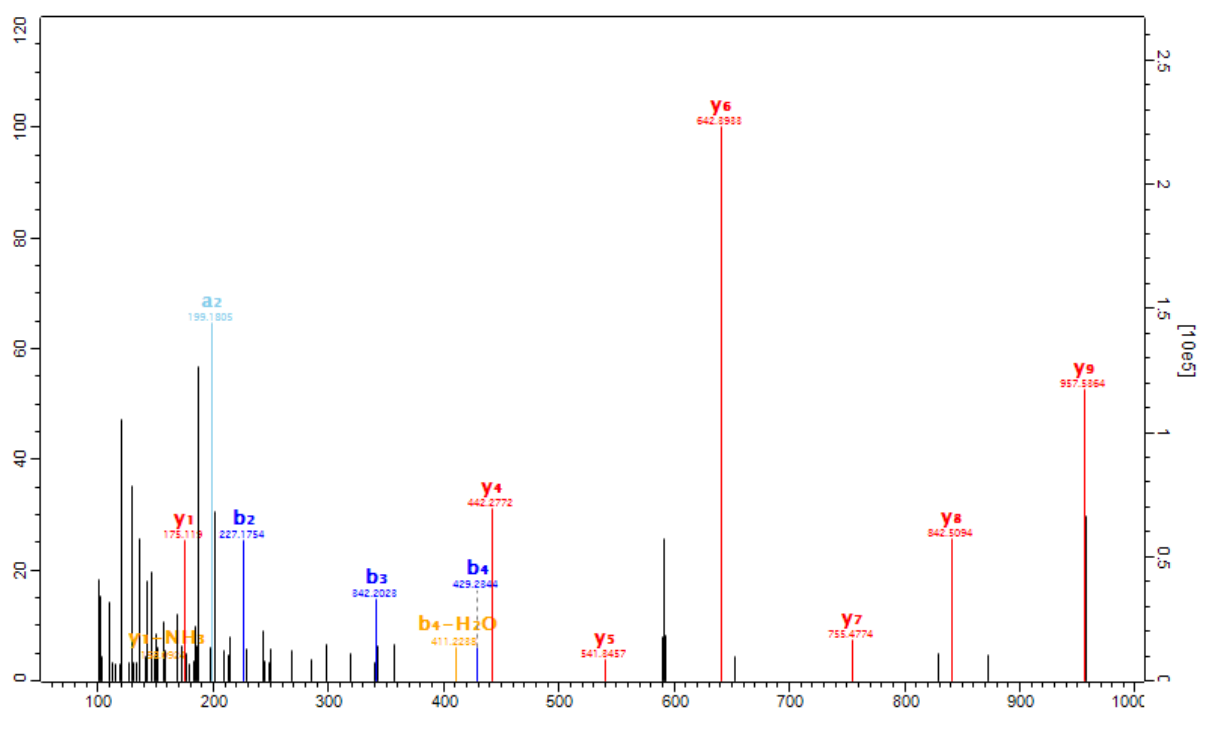

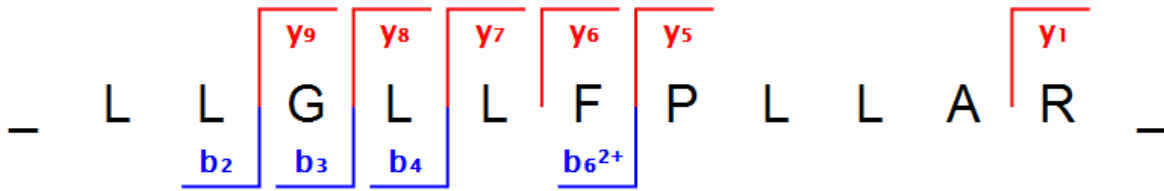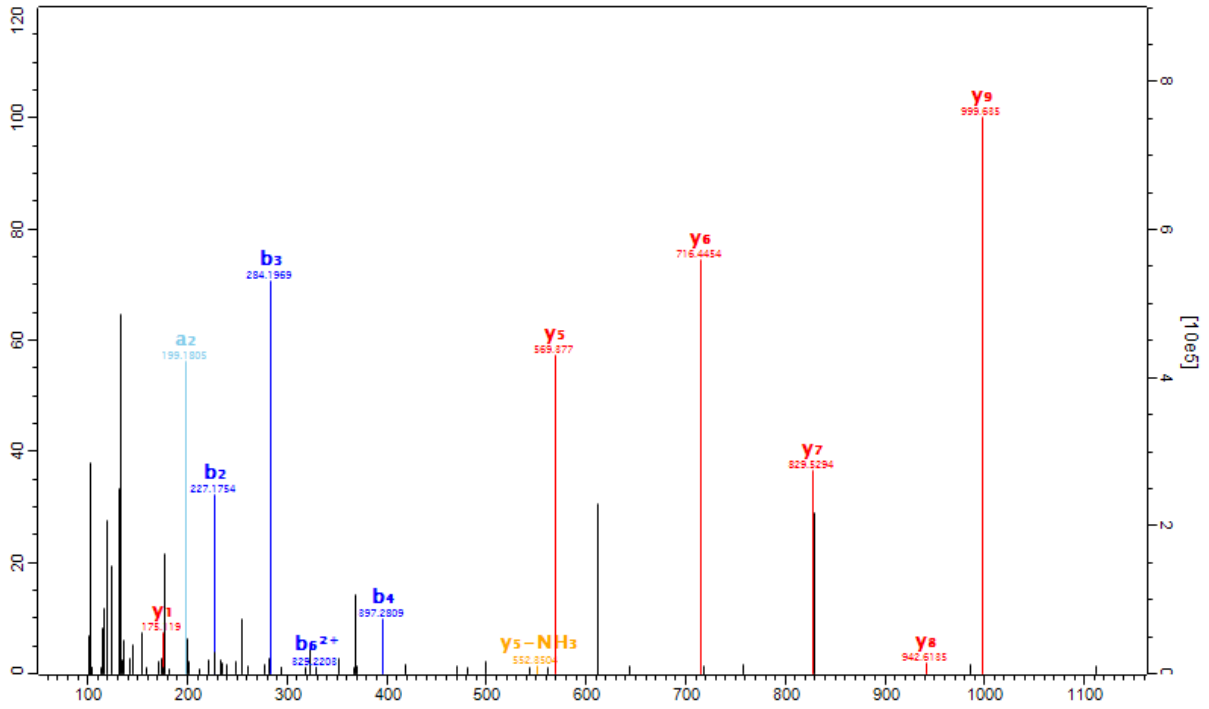

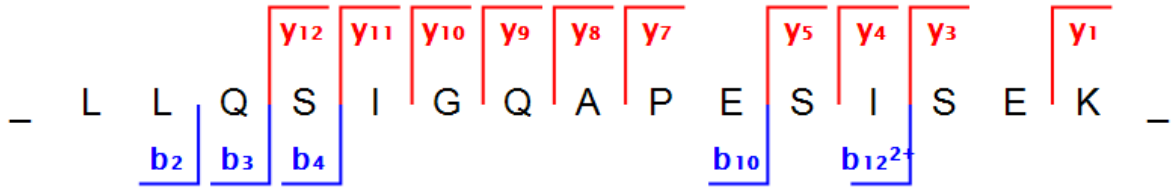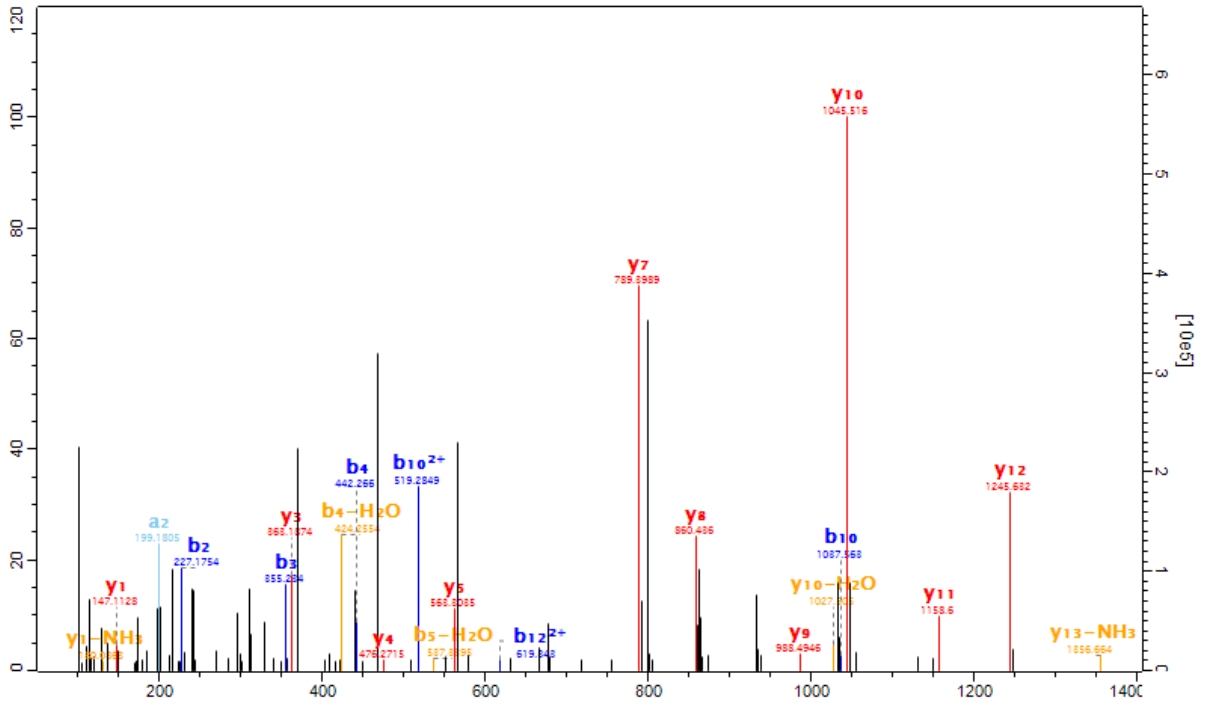

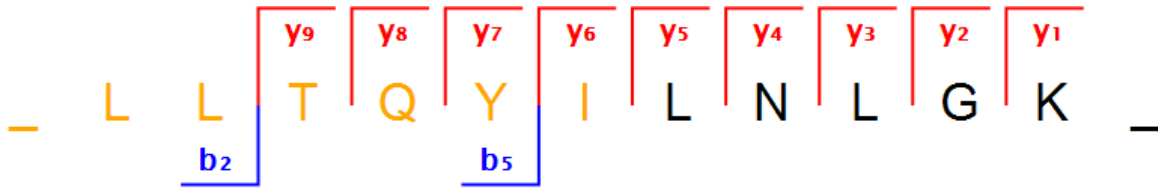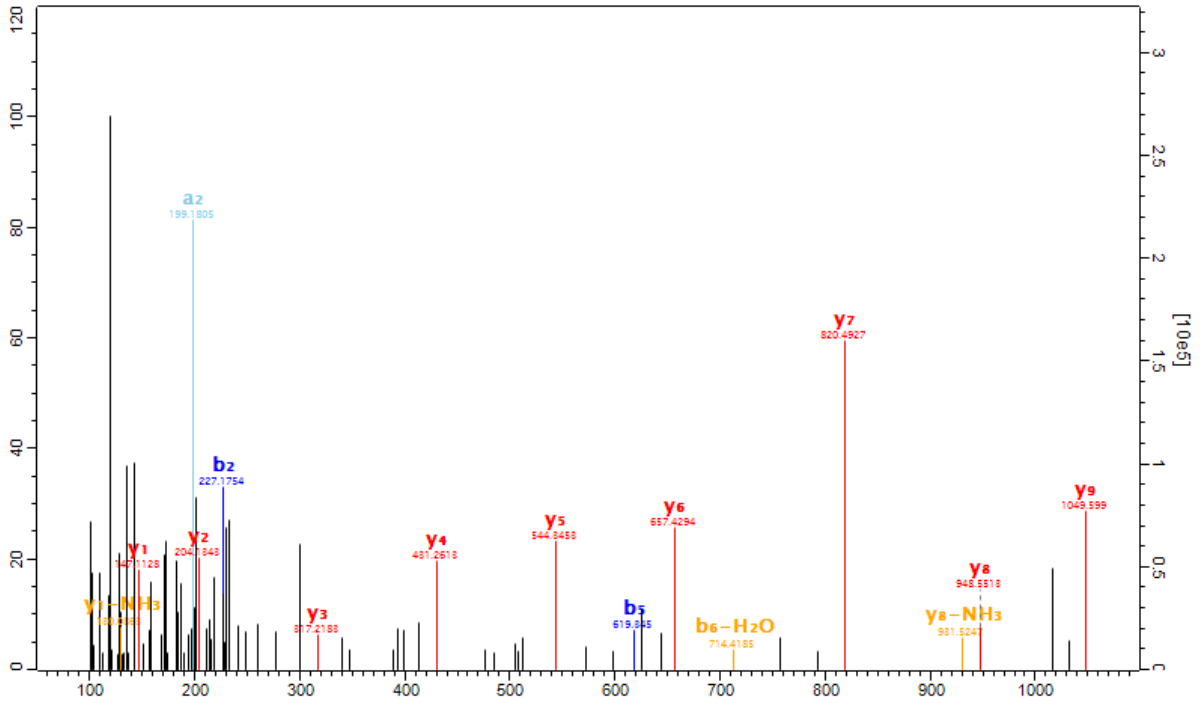

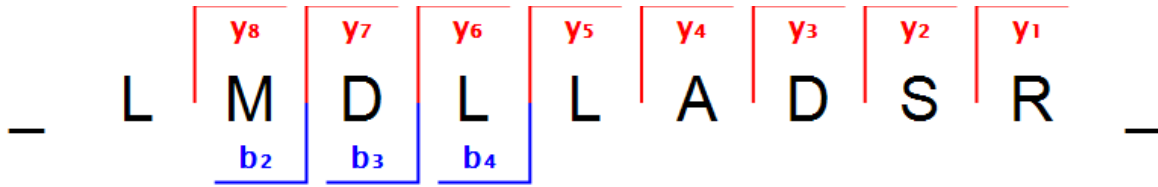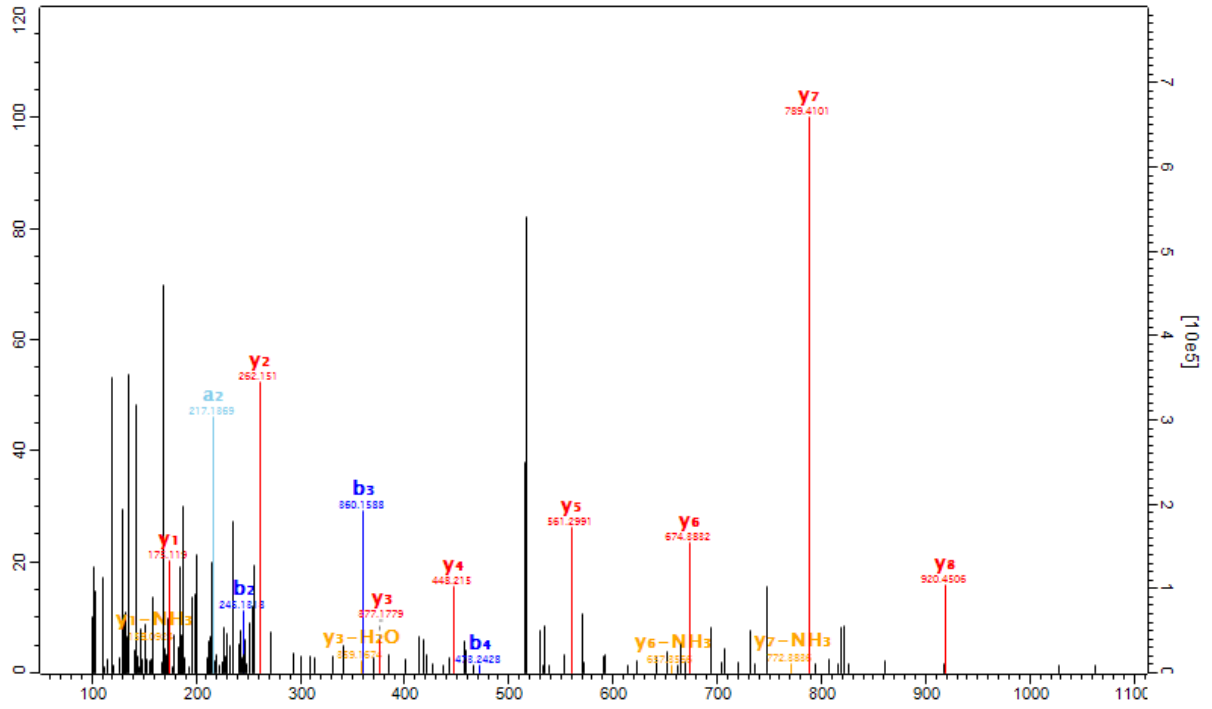

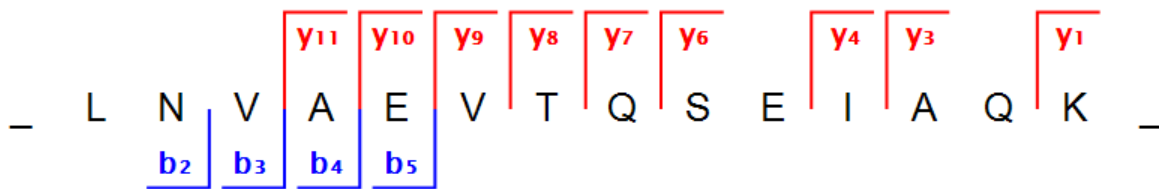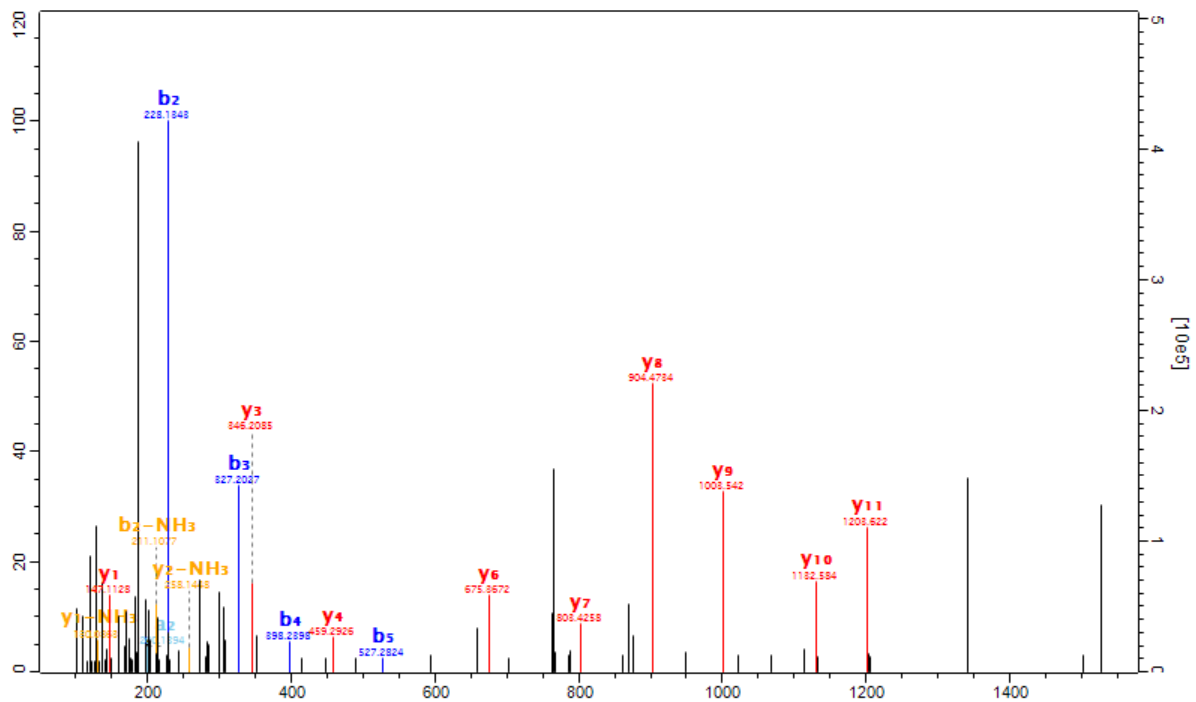



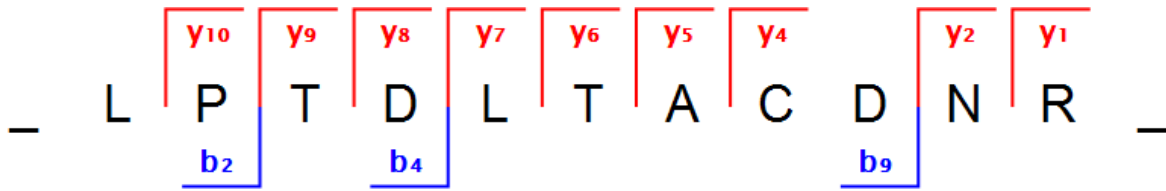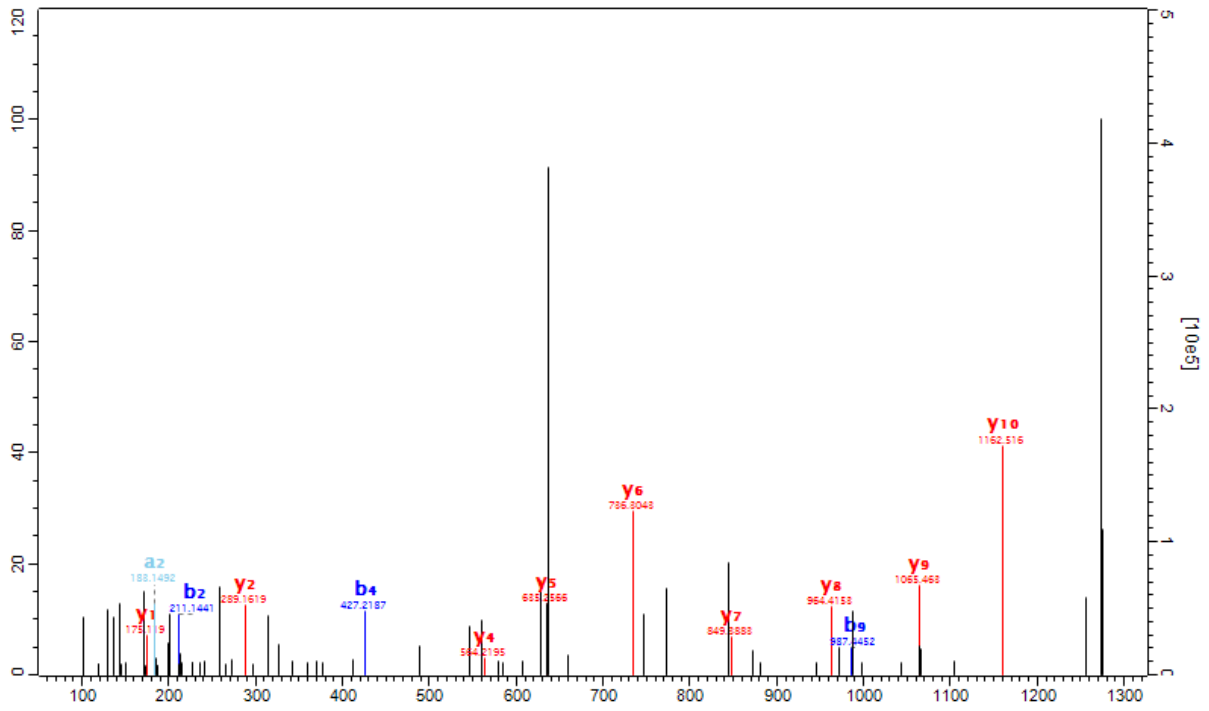

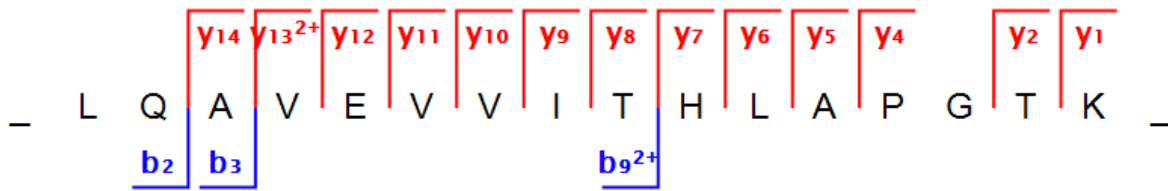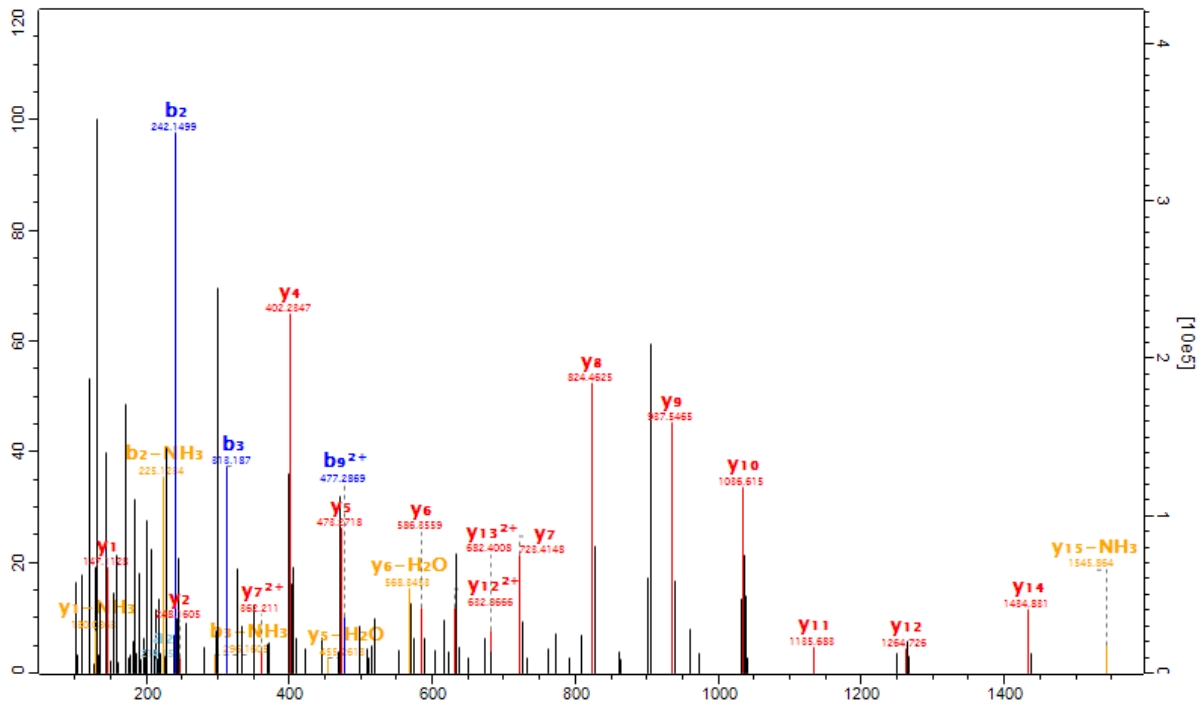

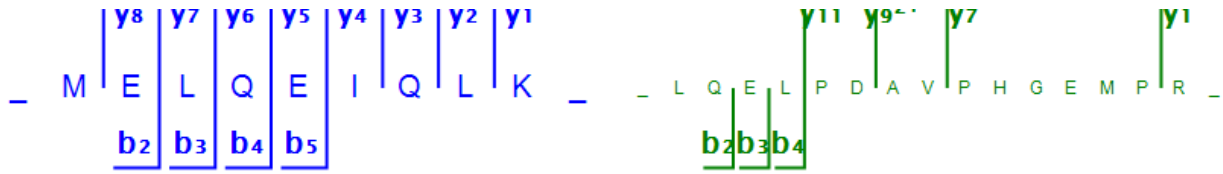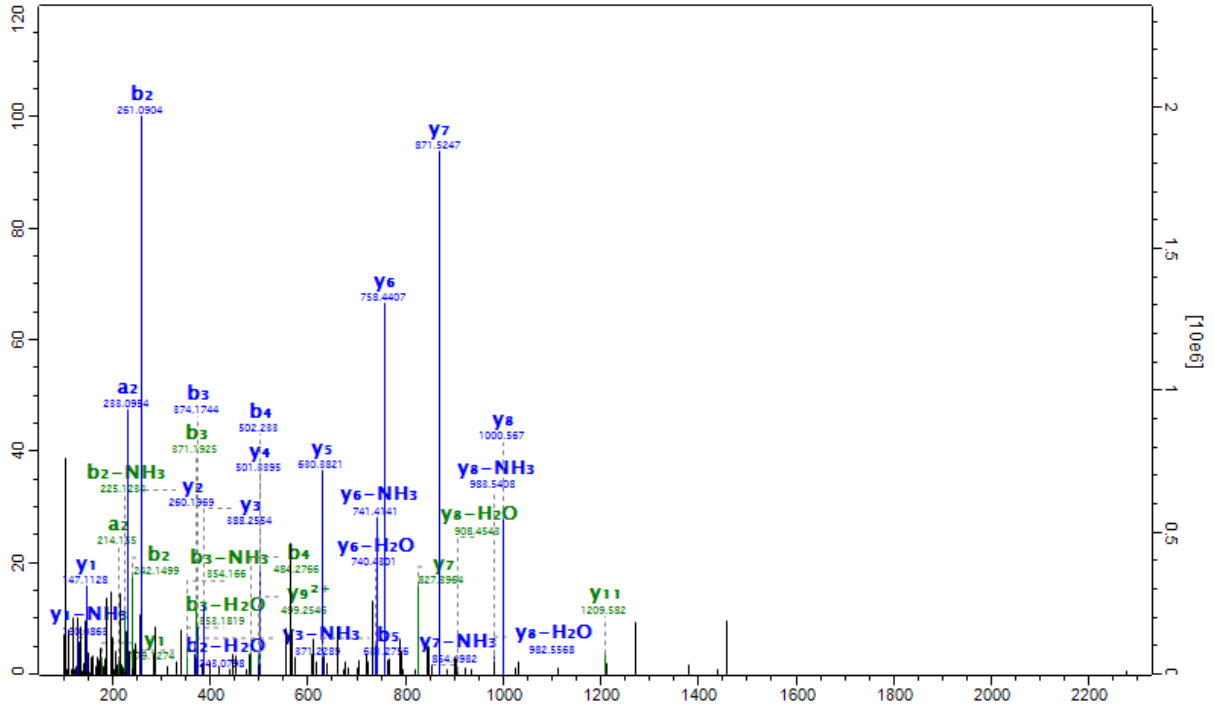

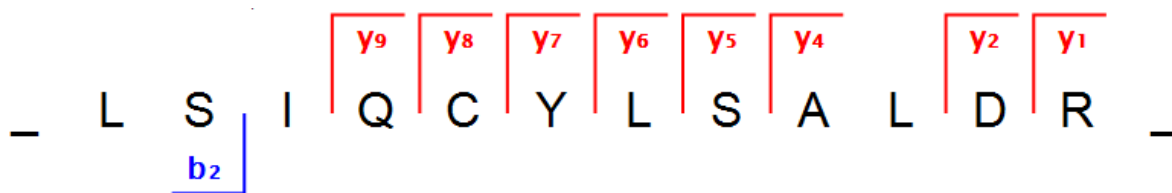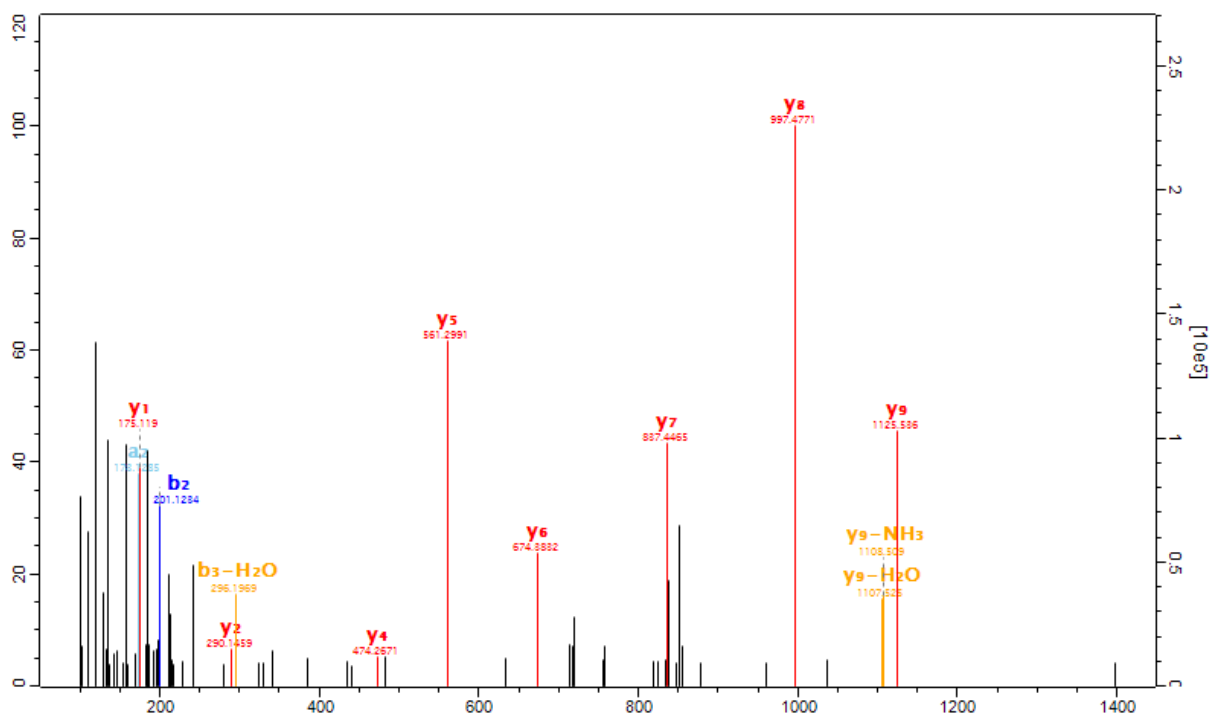

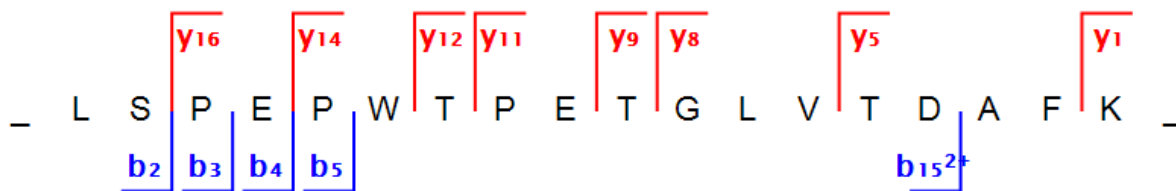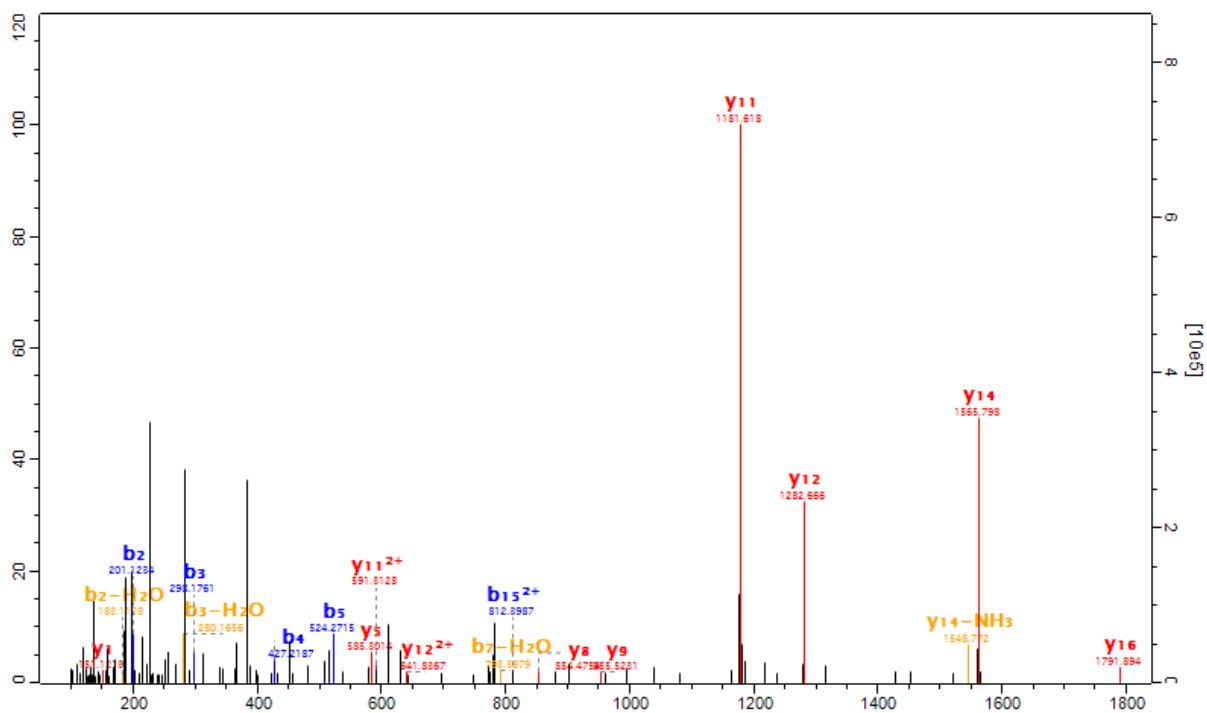

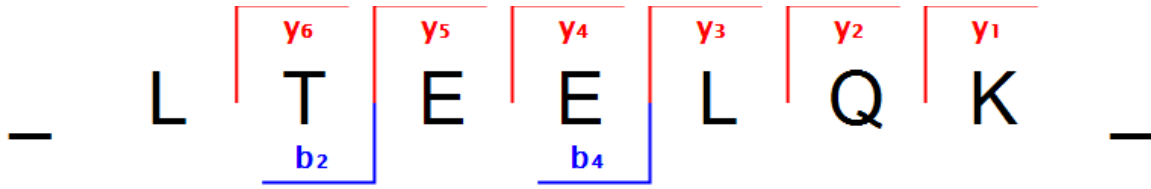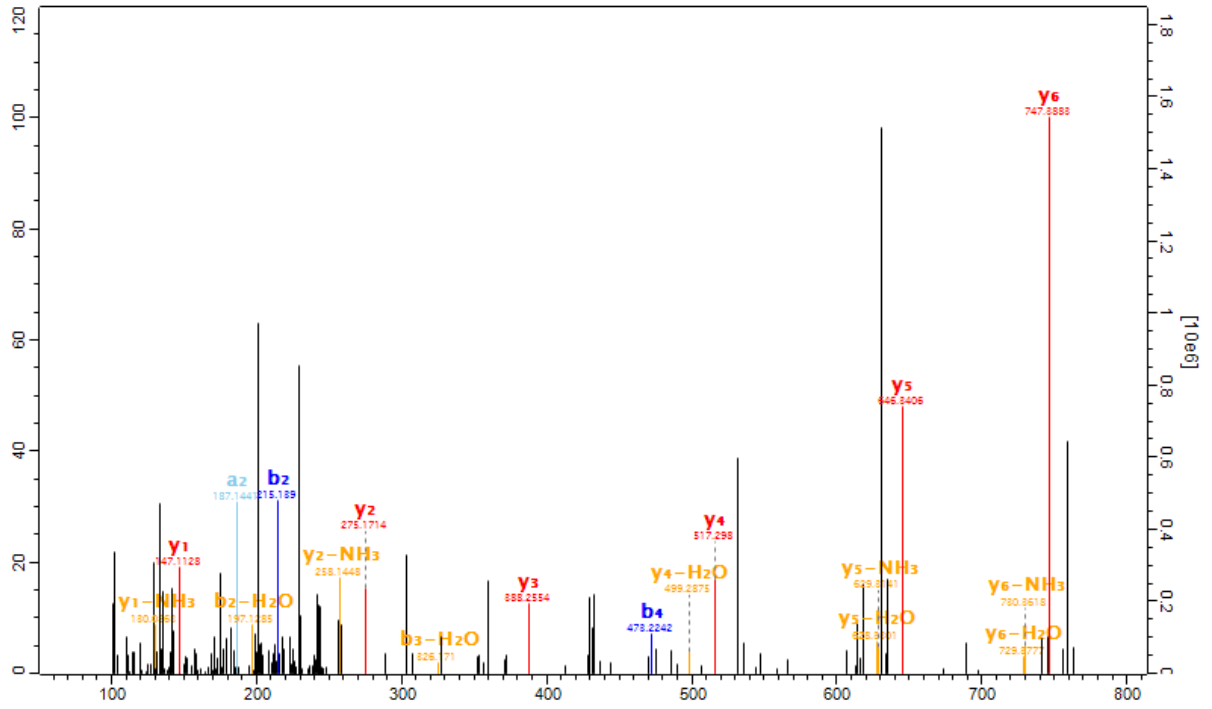

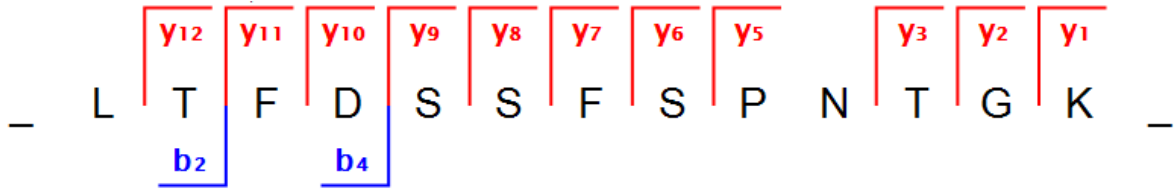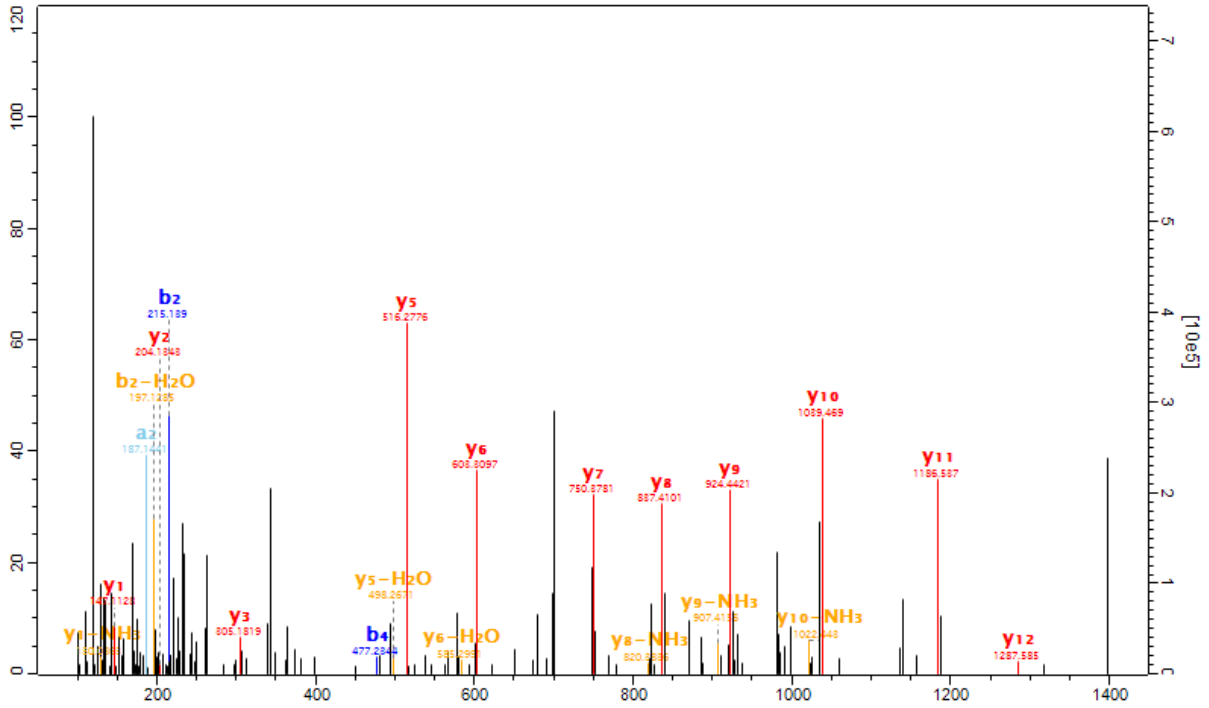

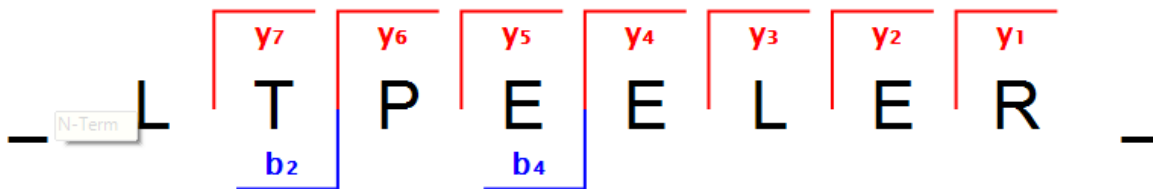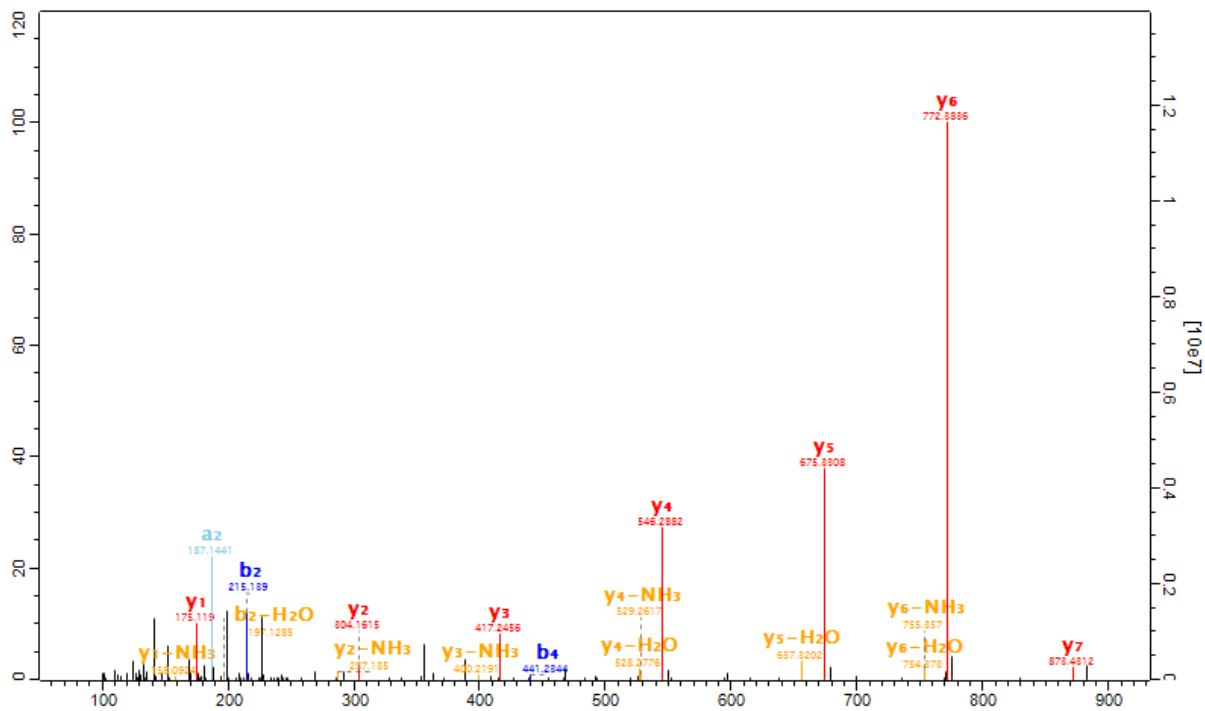



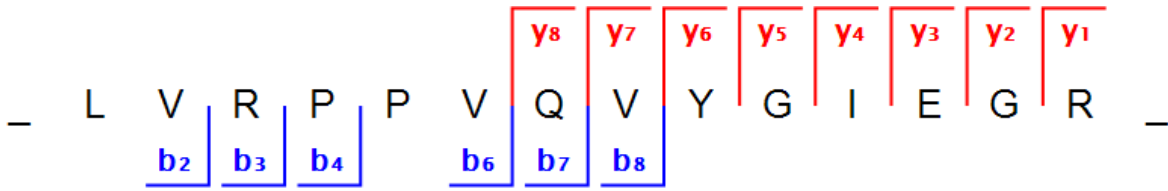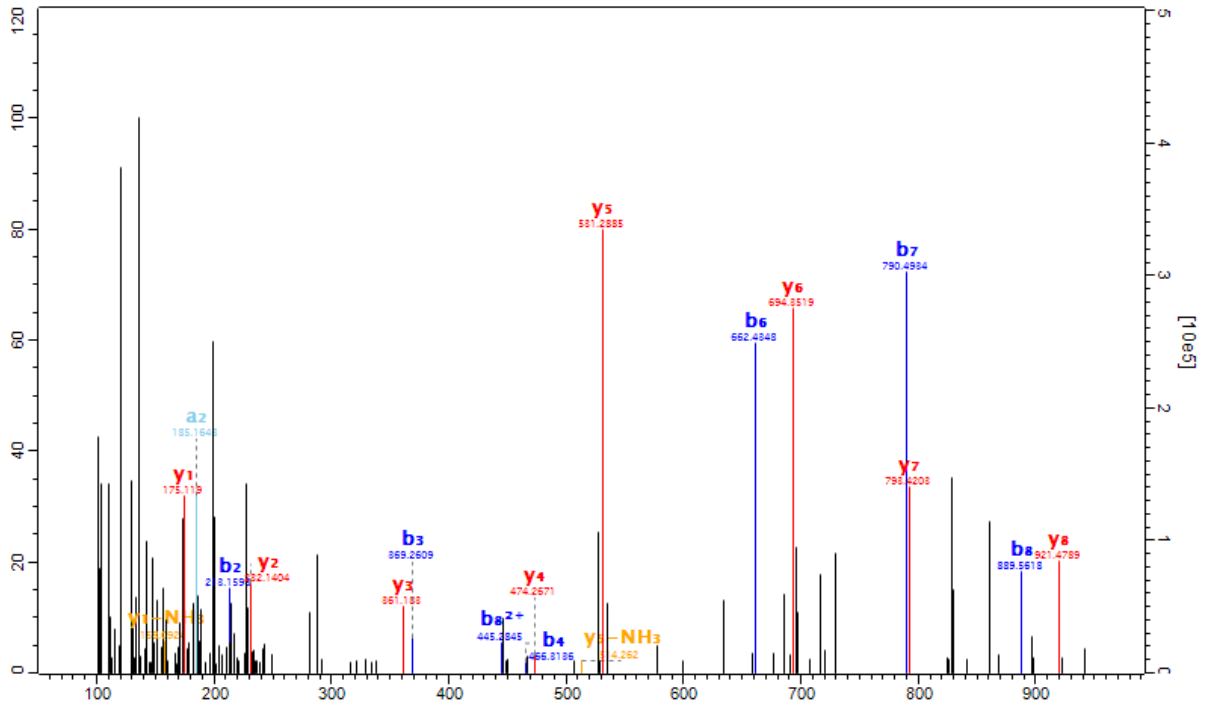

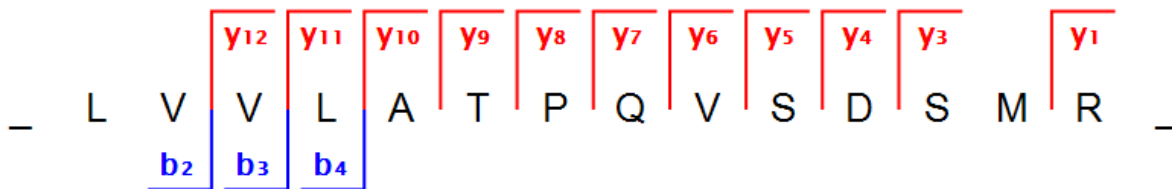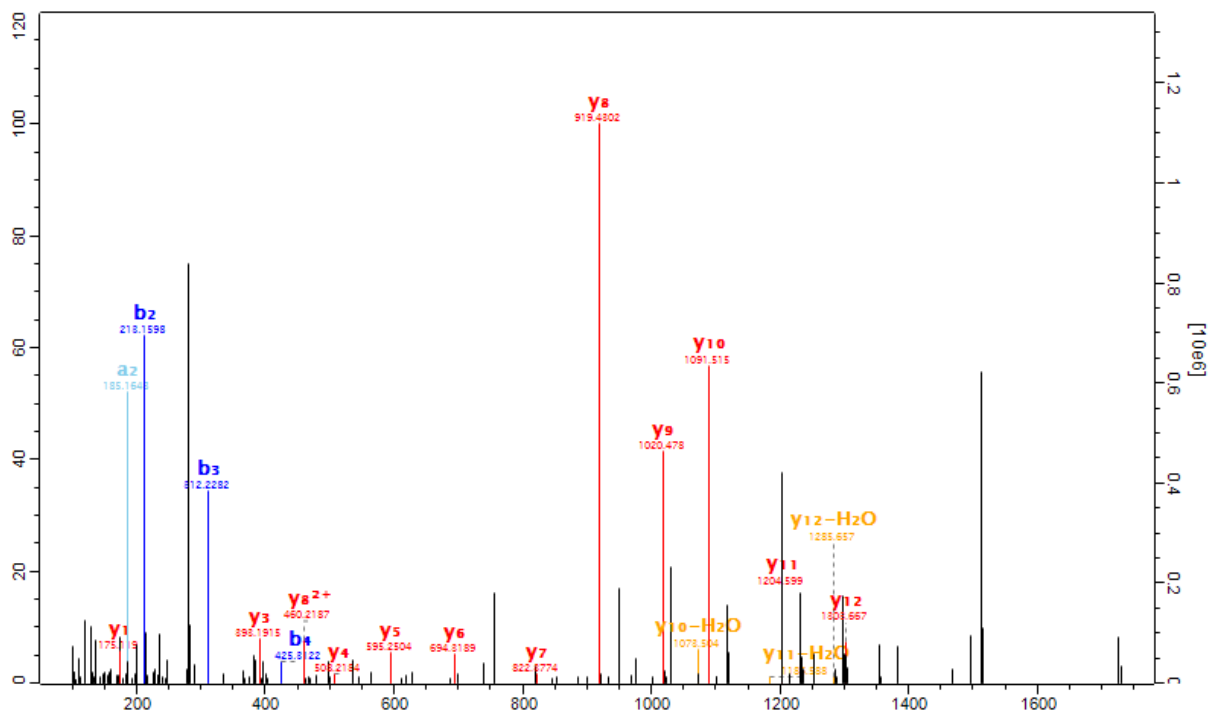

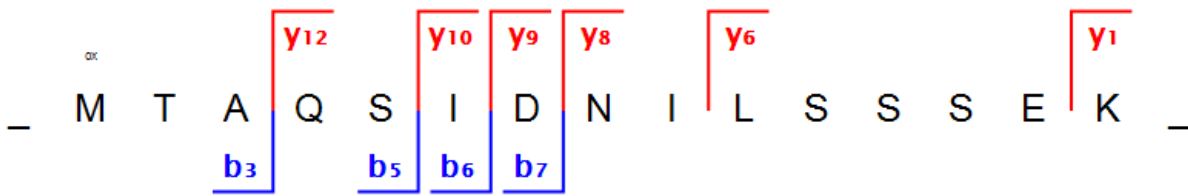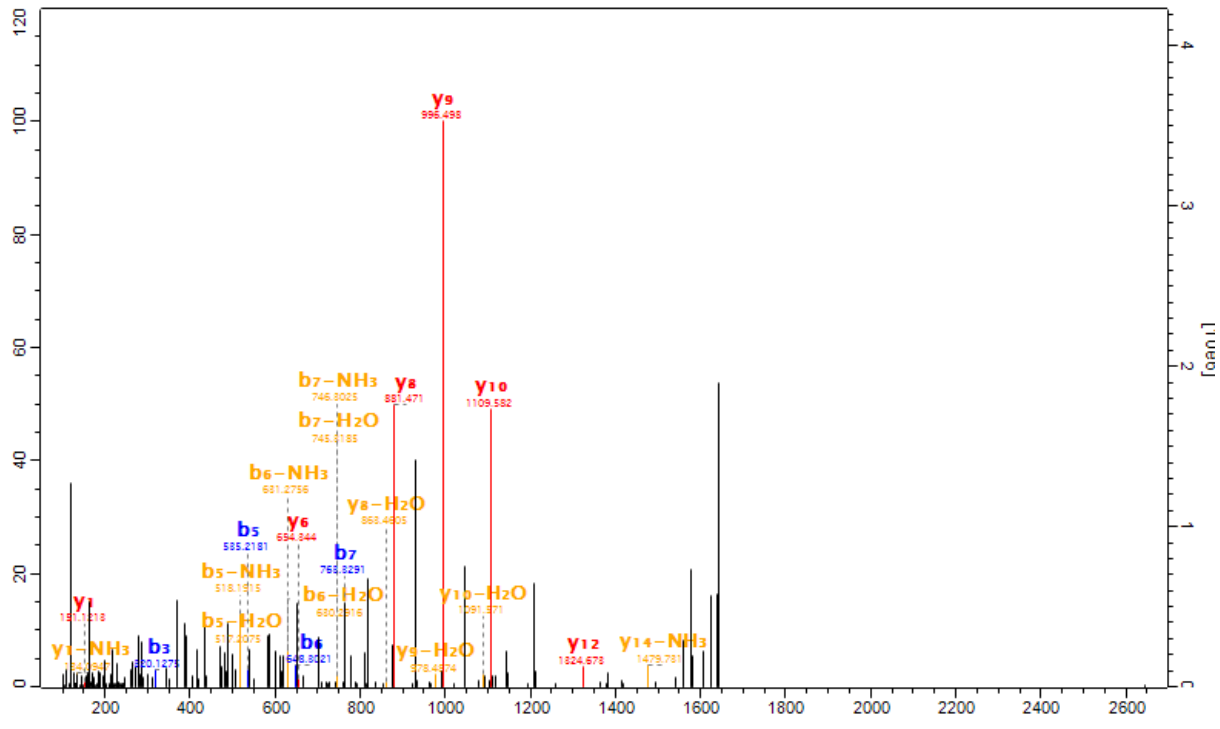

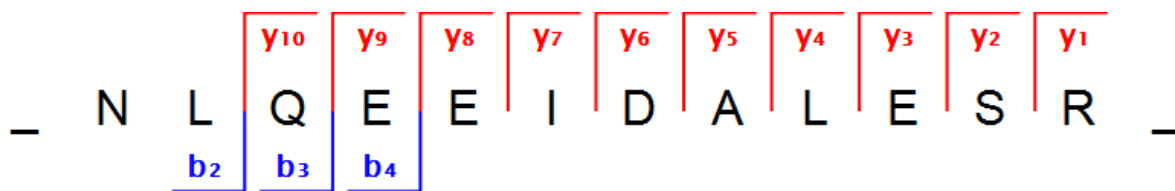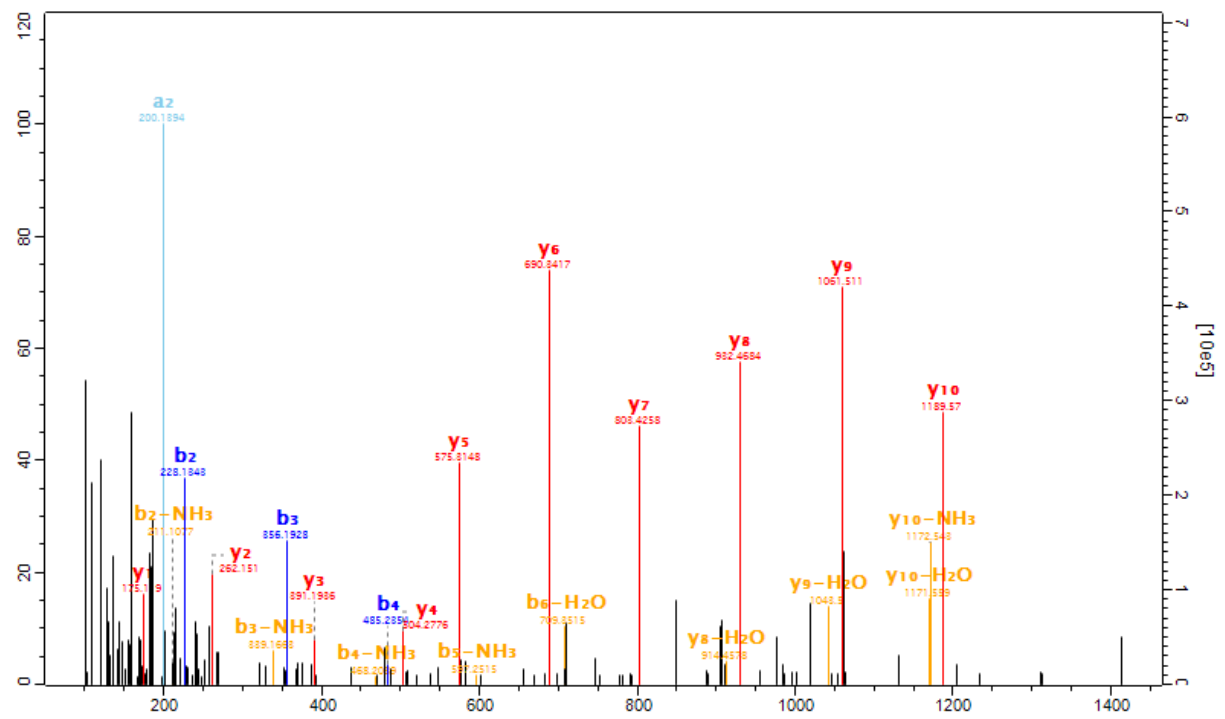

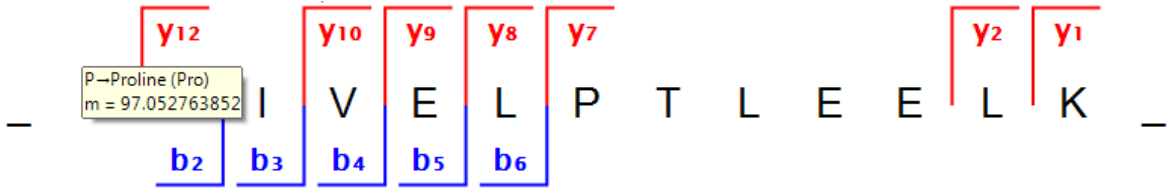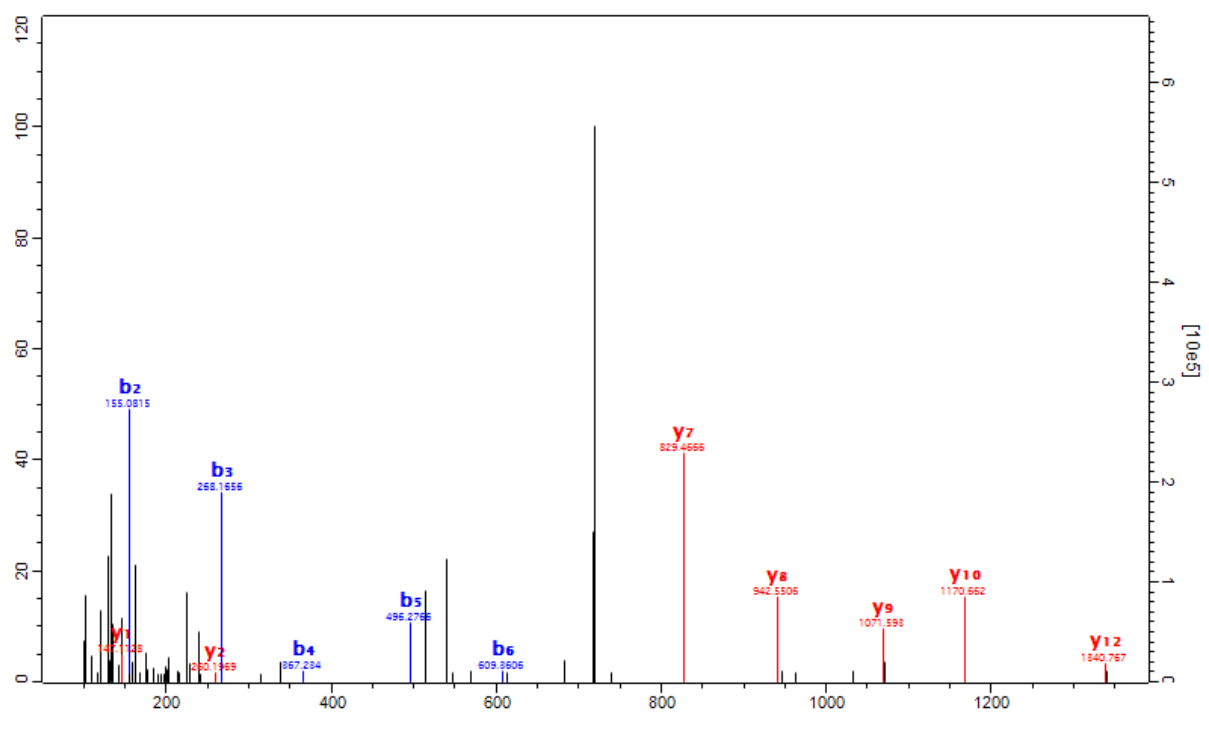

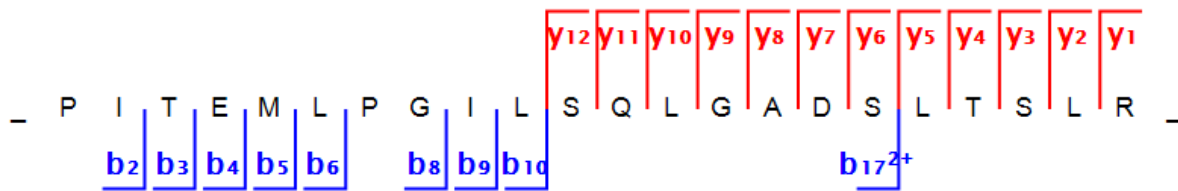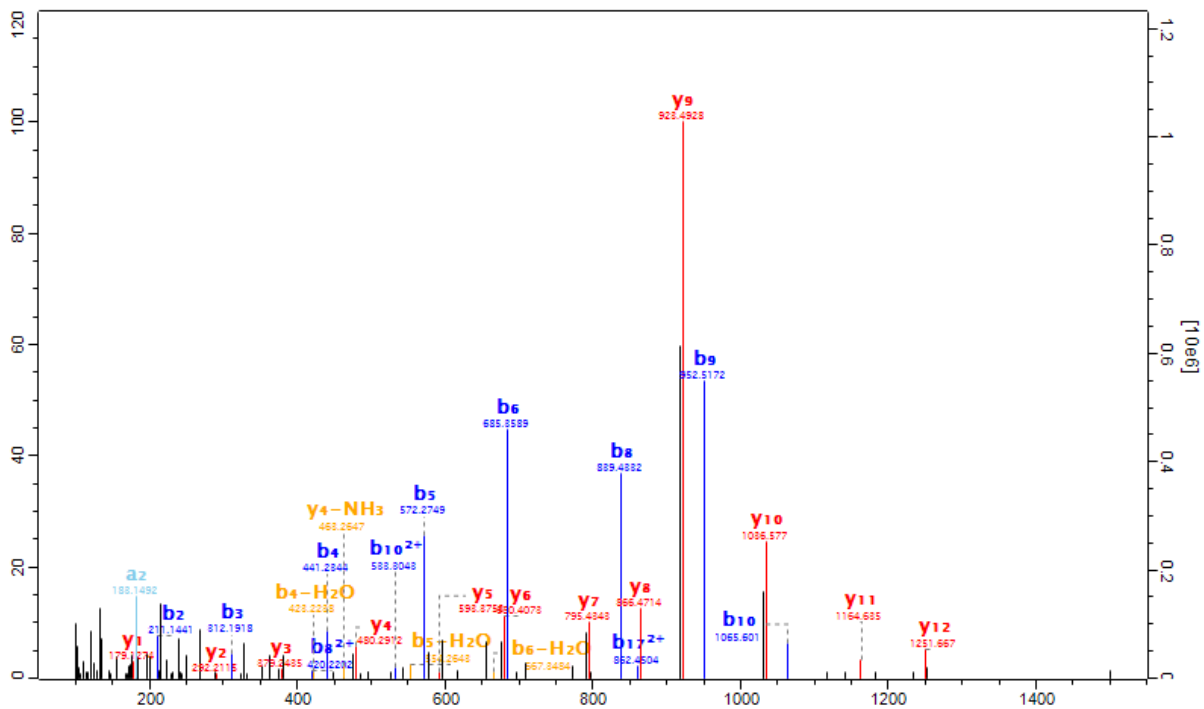

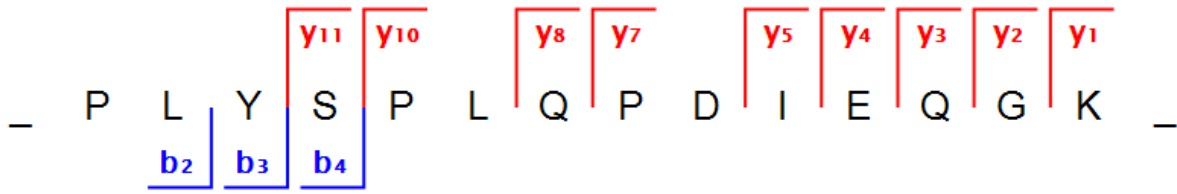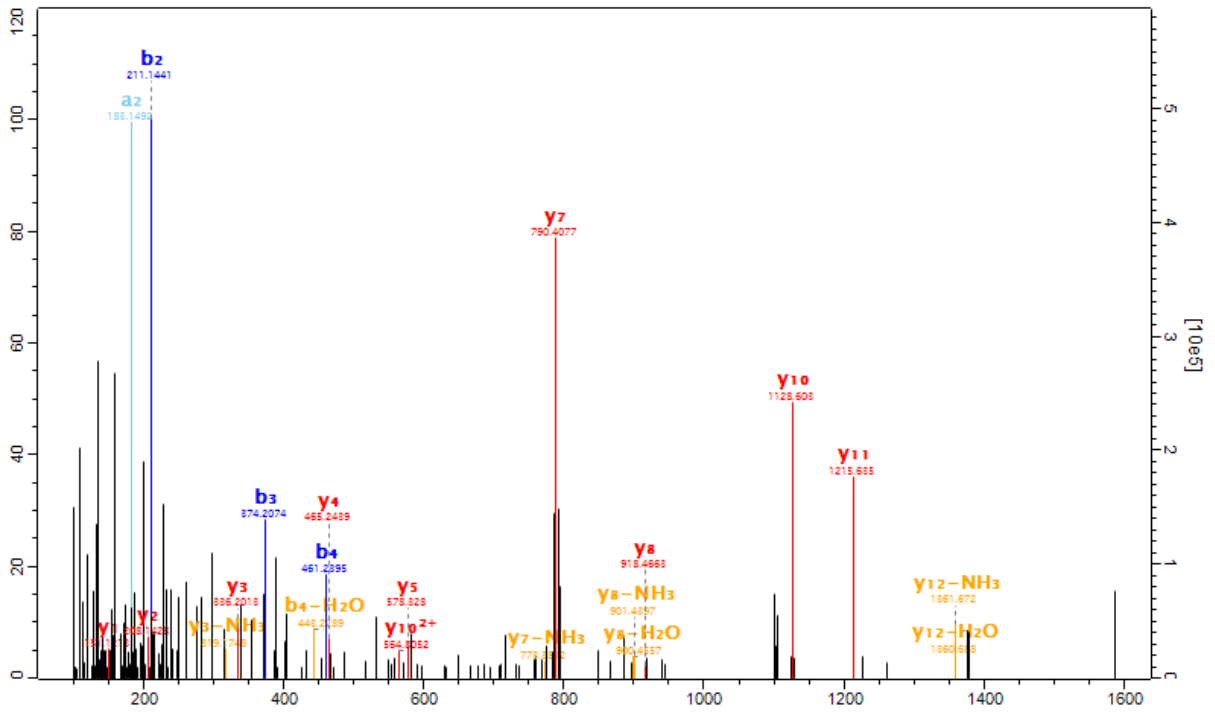

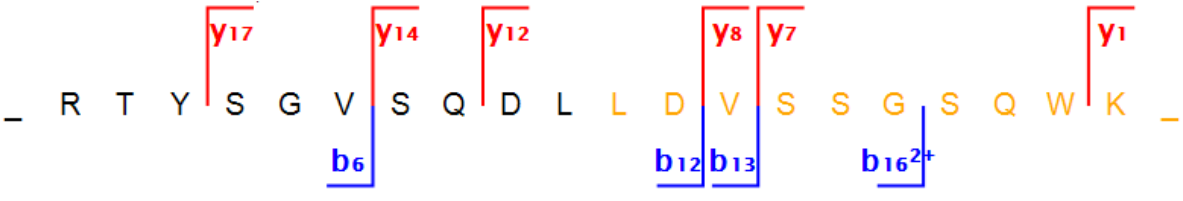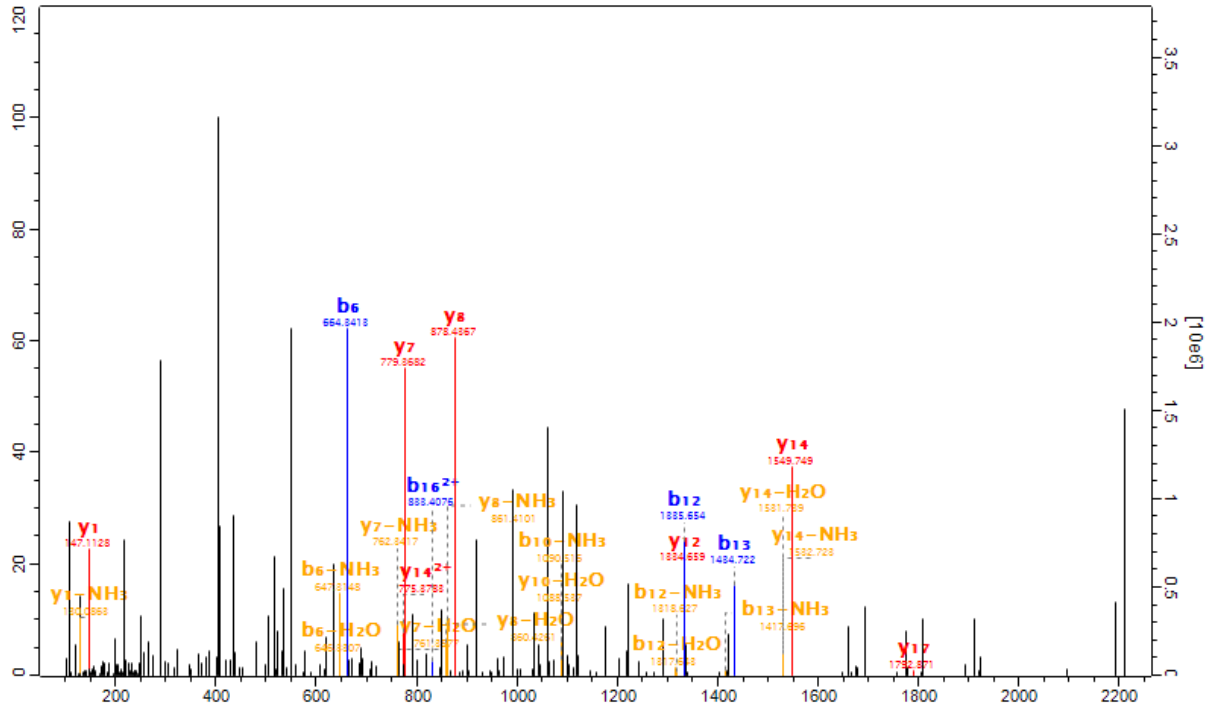



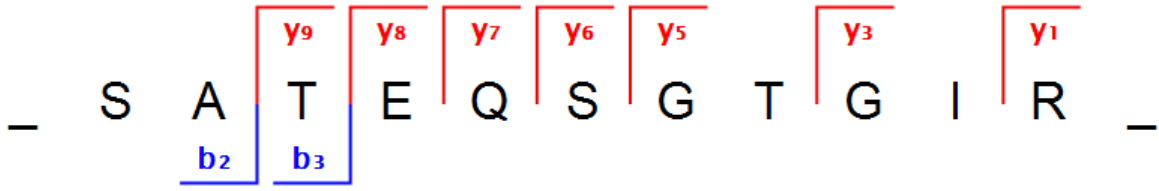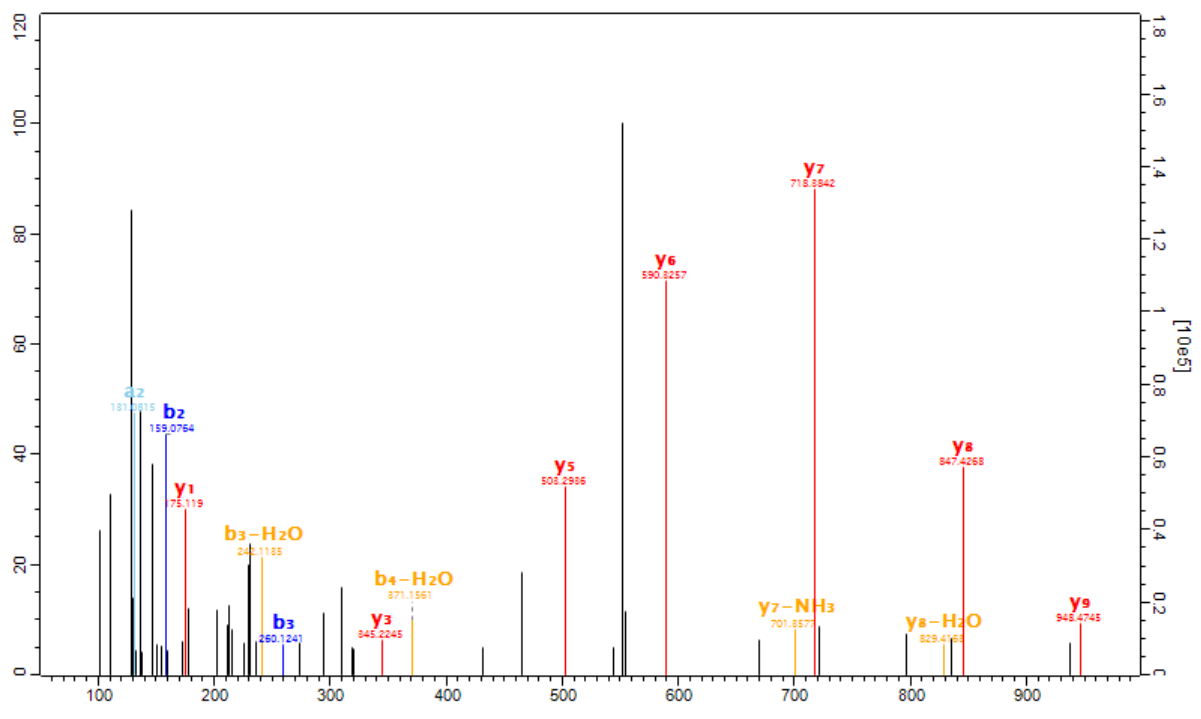

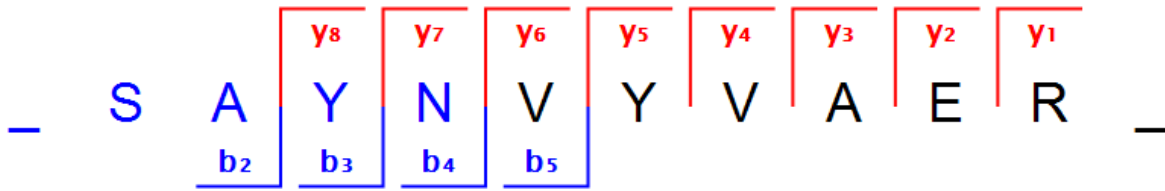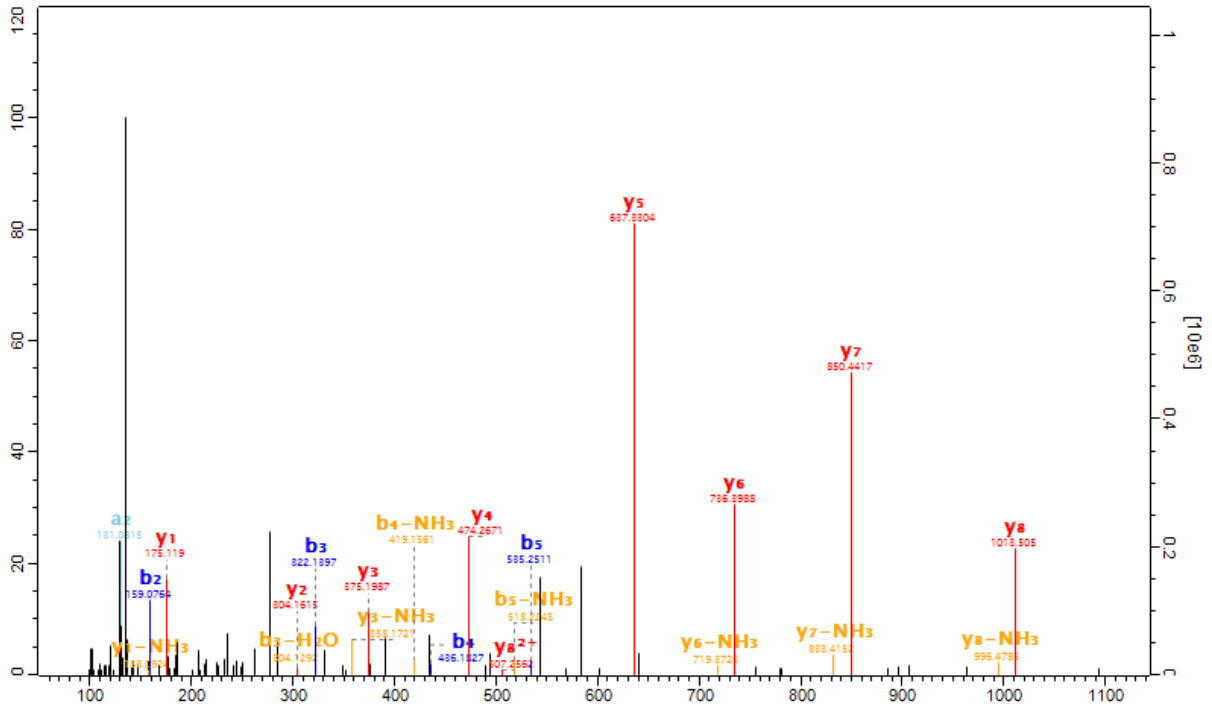

- S D K D L E T Q V I Q L N E Q V H S L K -  
 b2 b4 b5 b6 b7 b8 y12 y11 y10 y9 y8 y7 y4 y3 y1

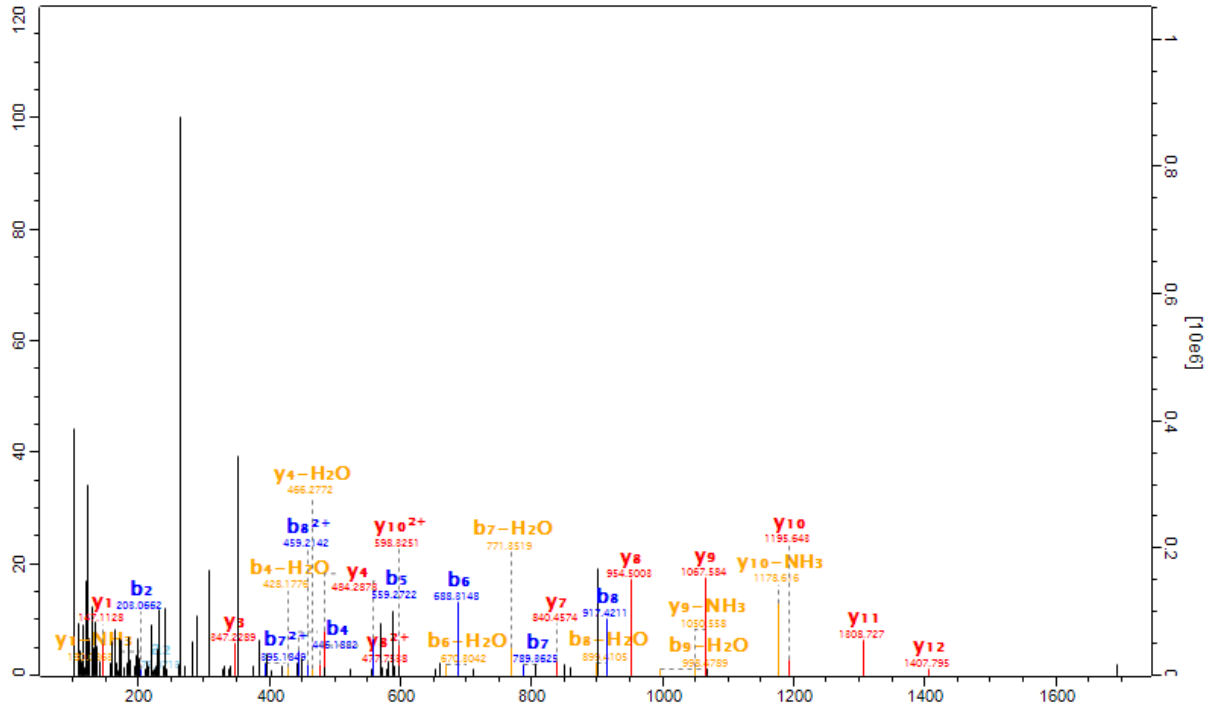

- S E I S E N T D A S G K -  
 b<sub>2</sub>

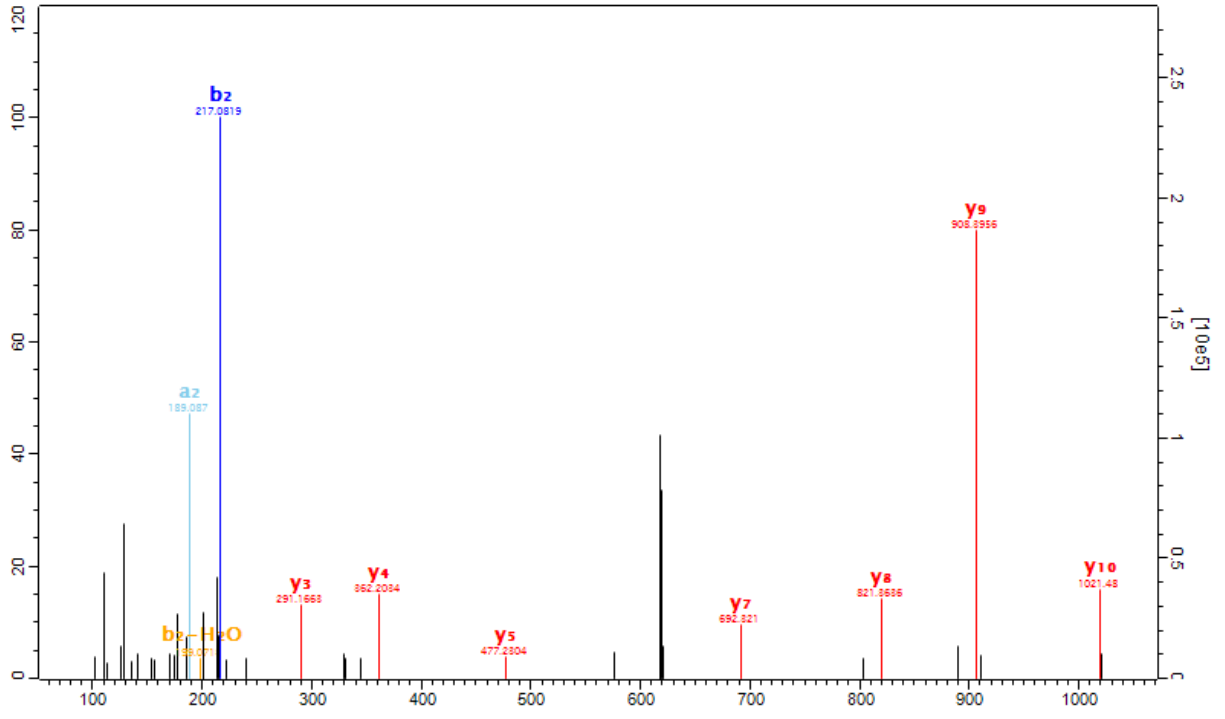

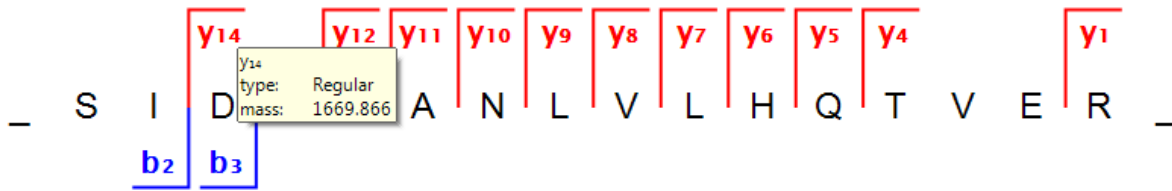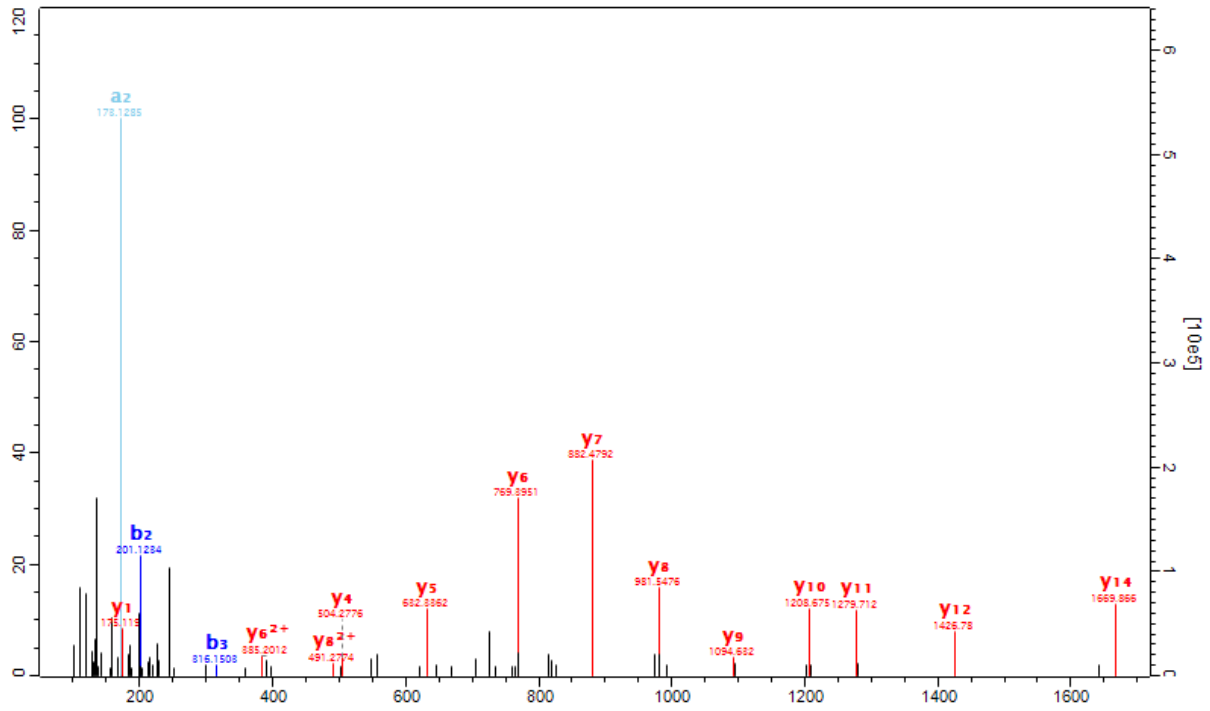

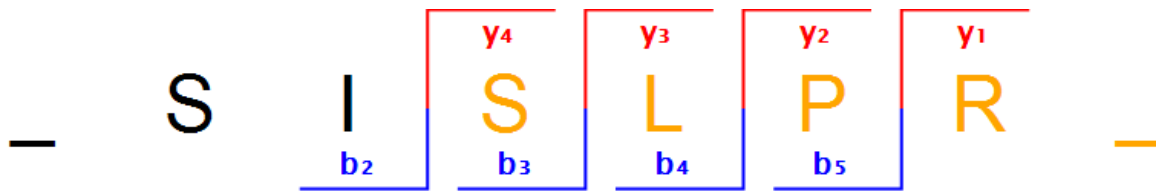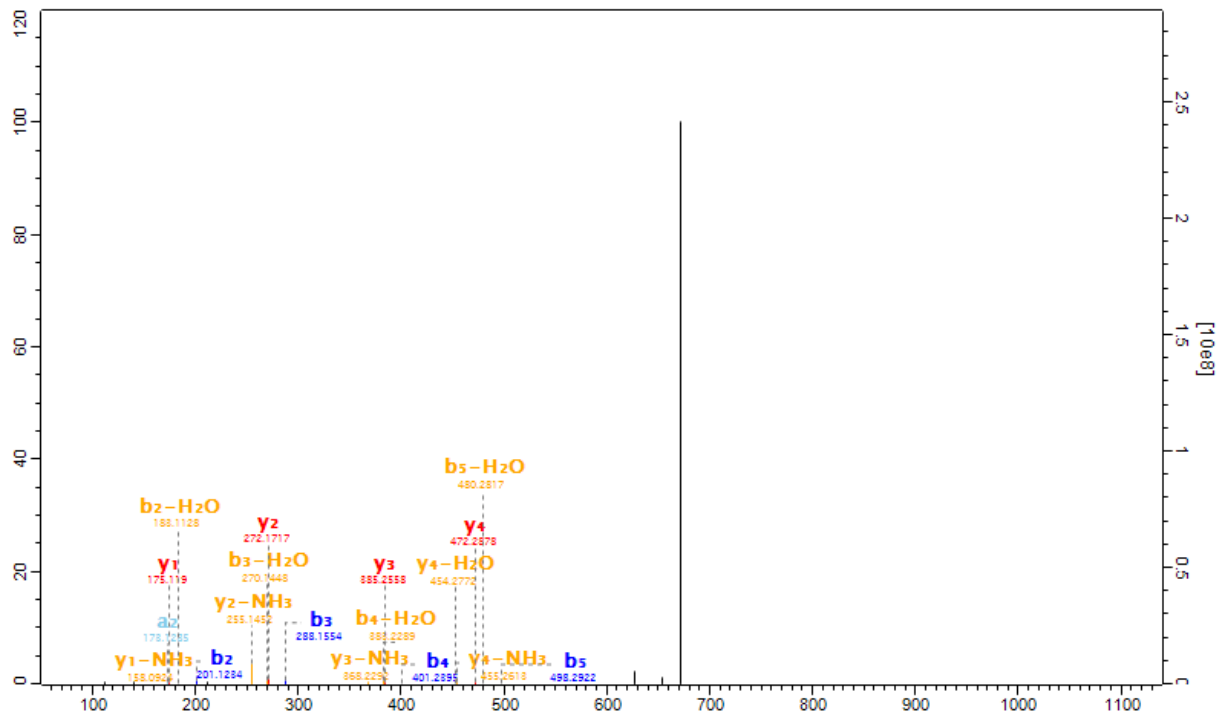

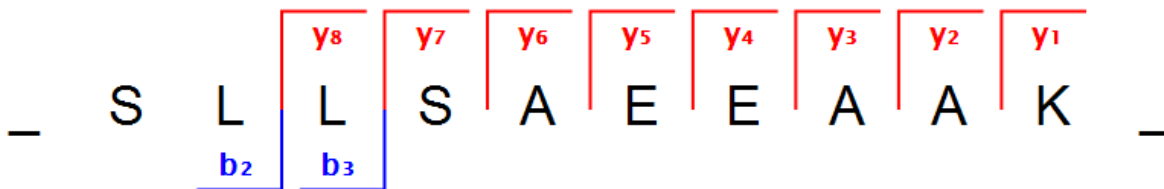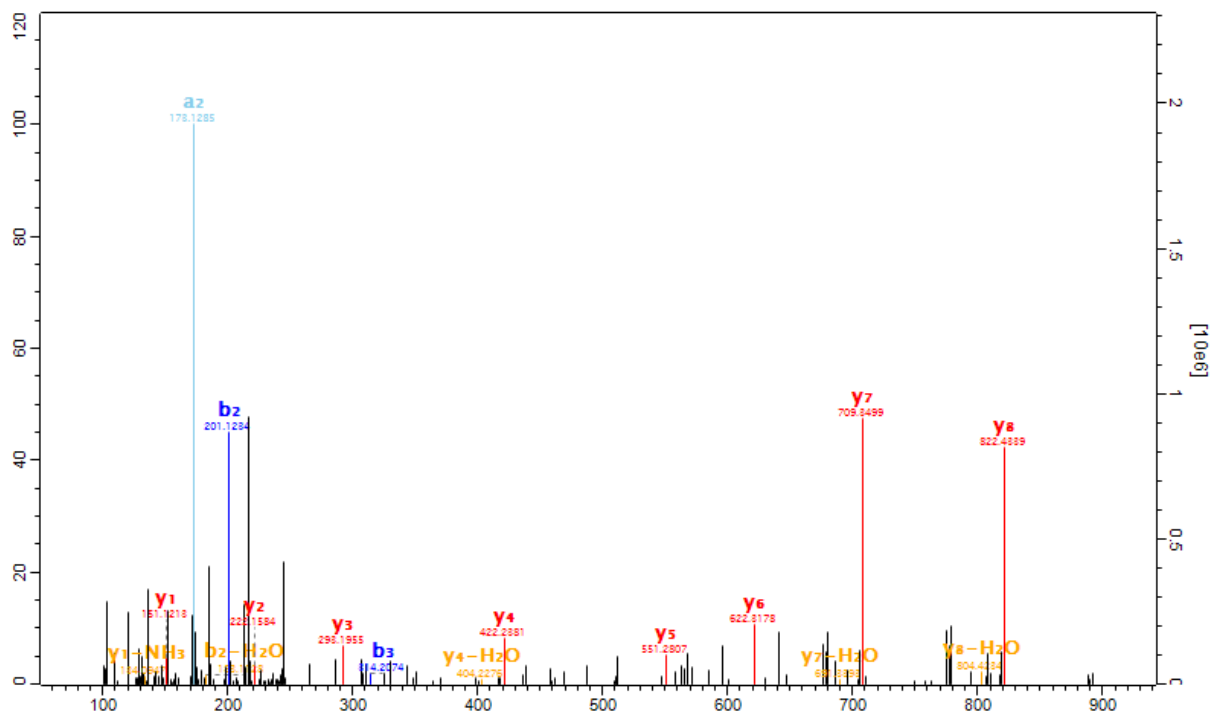

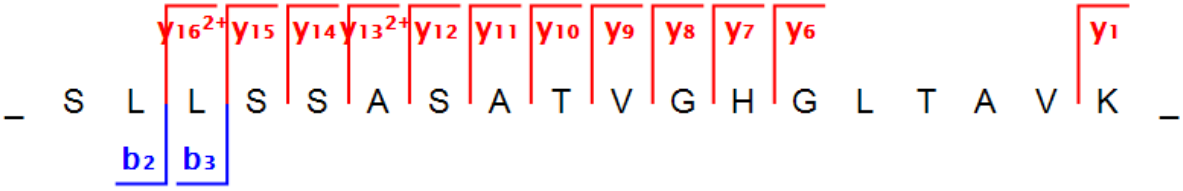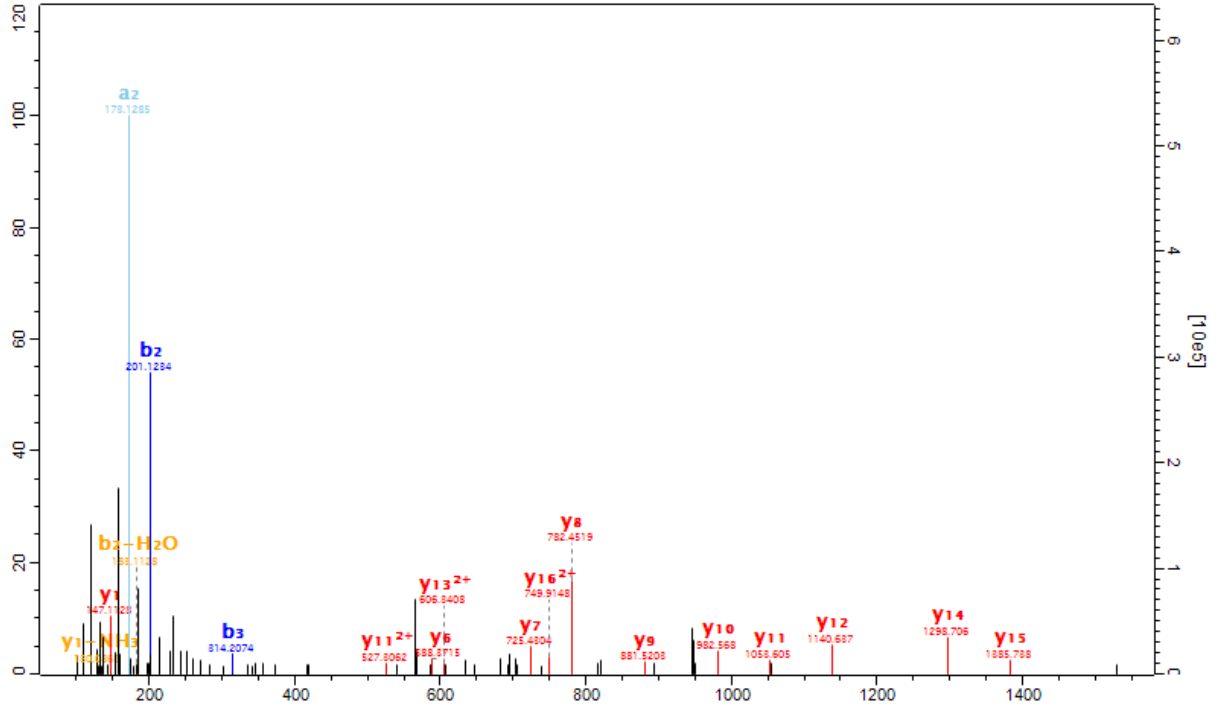



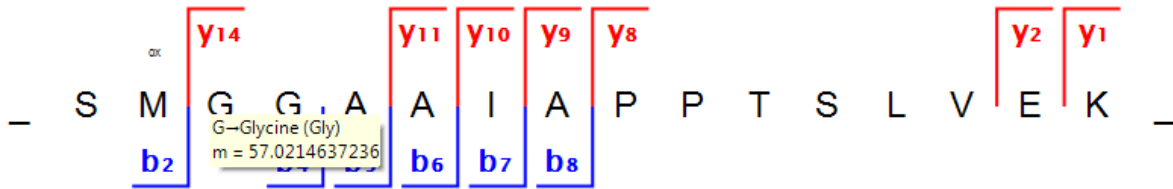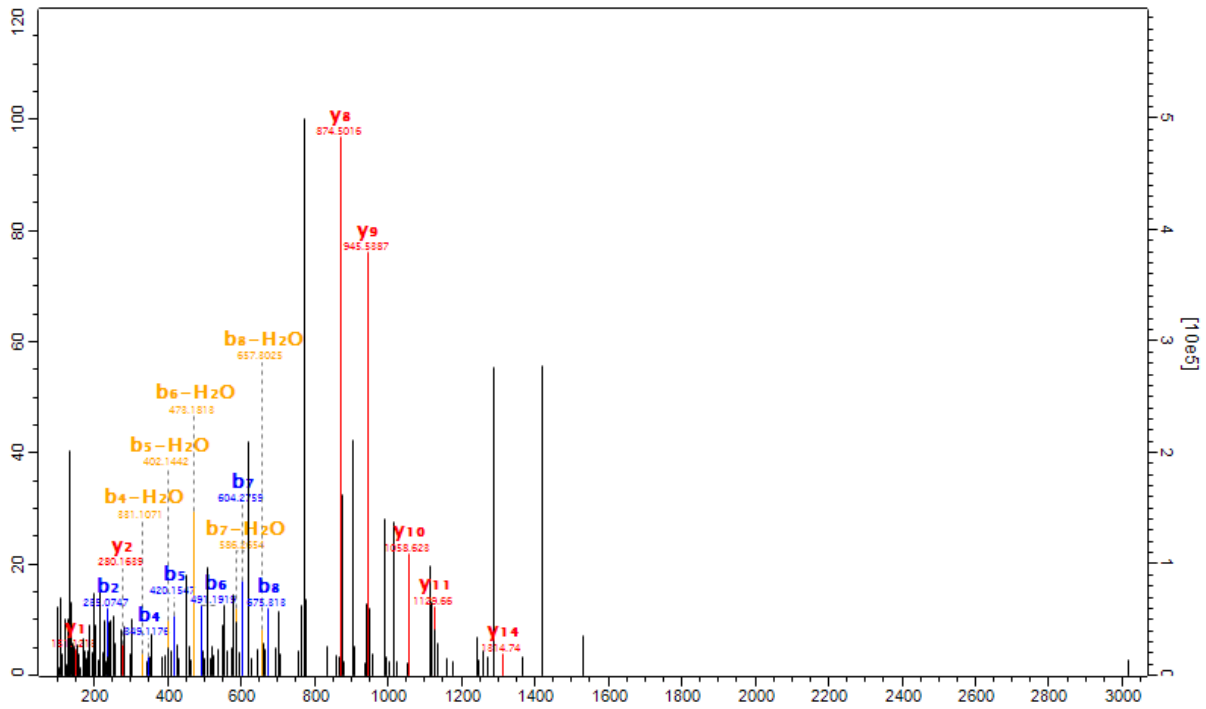

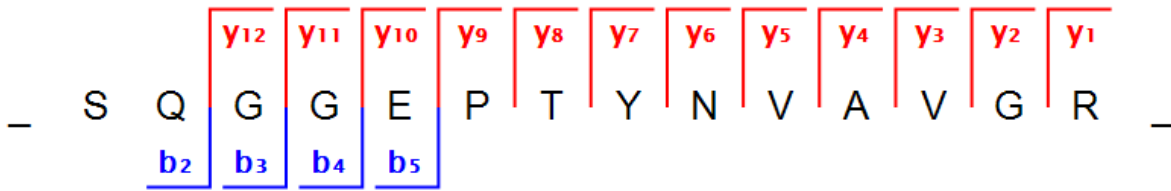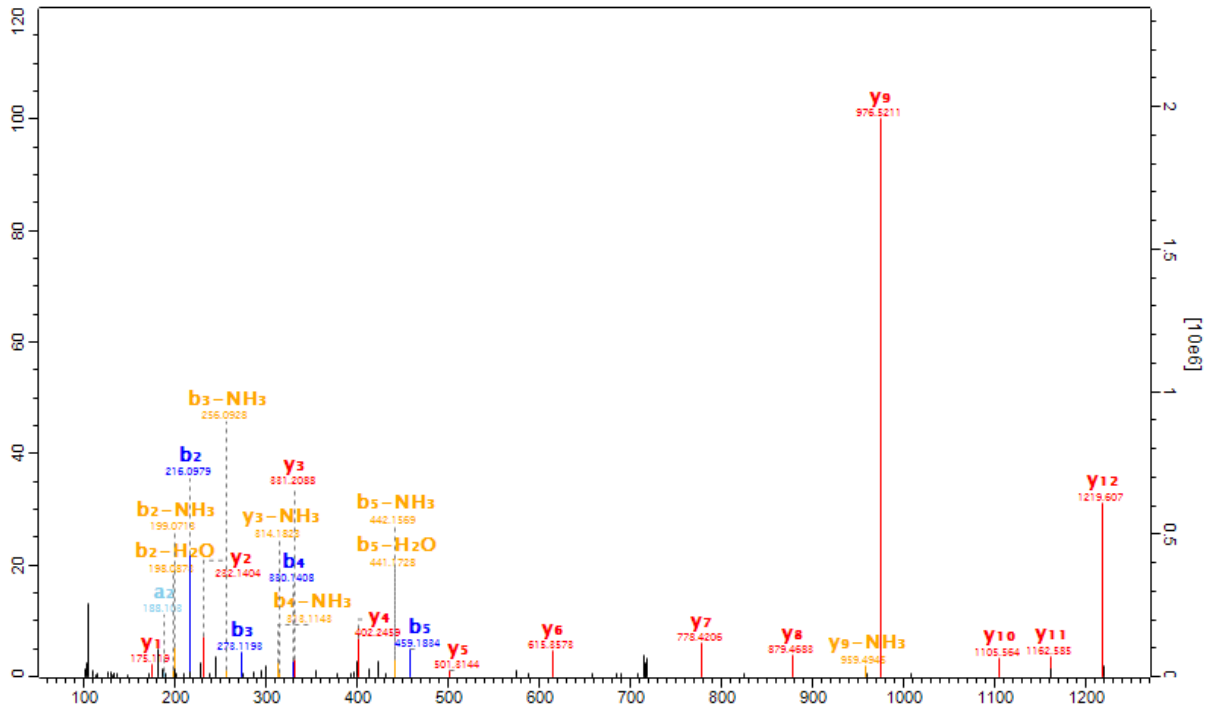

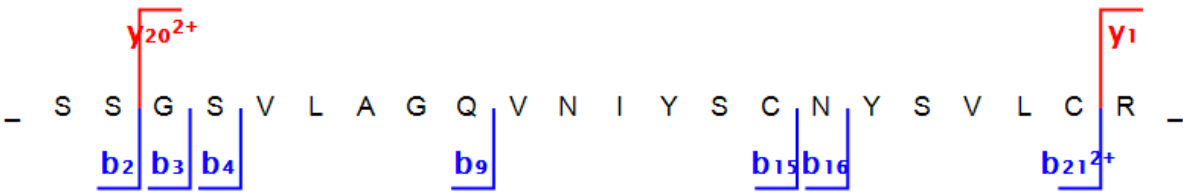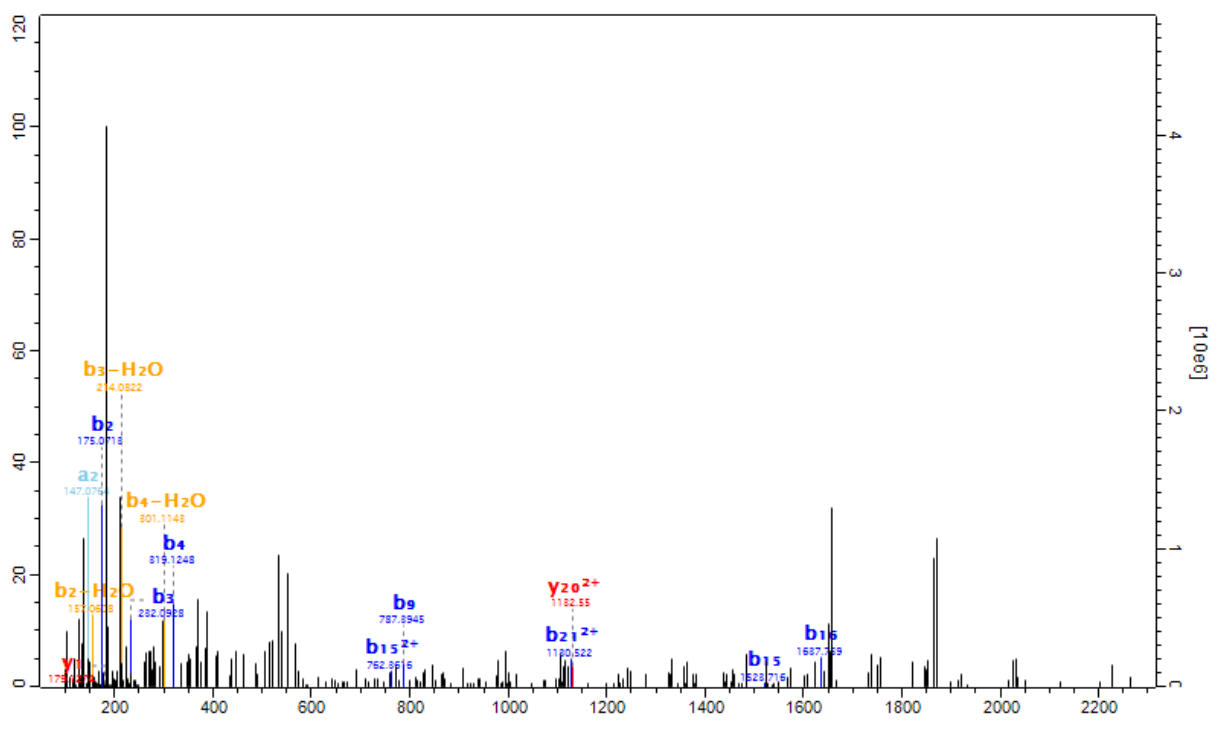

- S S V S H S V L S E M Q V I E Q E T P V S A K -  
 b5 b6 b7 b8 b9 b10 b11 b12 b13  
 y11 y10 y9 y8 y7 y6 y5 y3 y1

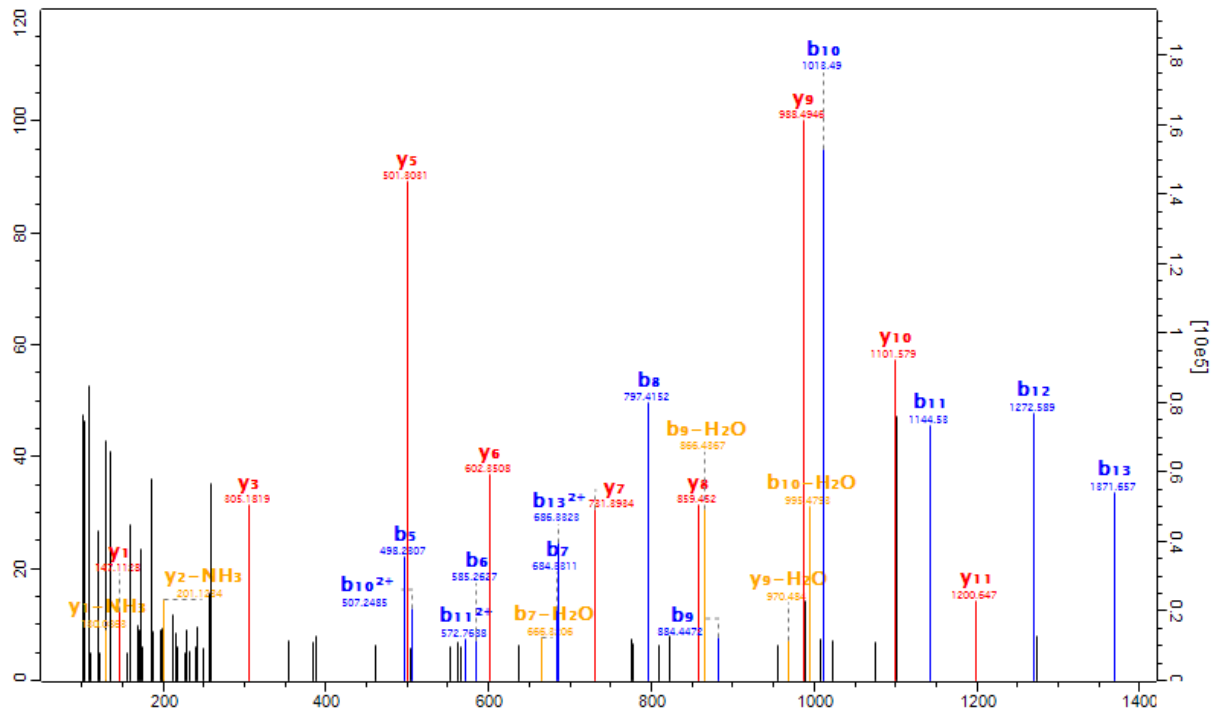

- S T S E S F I Q H I V S L V H H V K -  
 b<sub>2</sub>

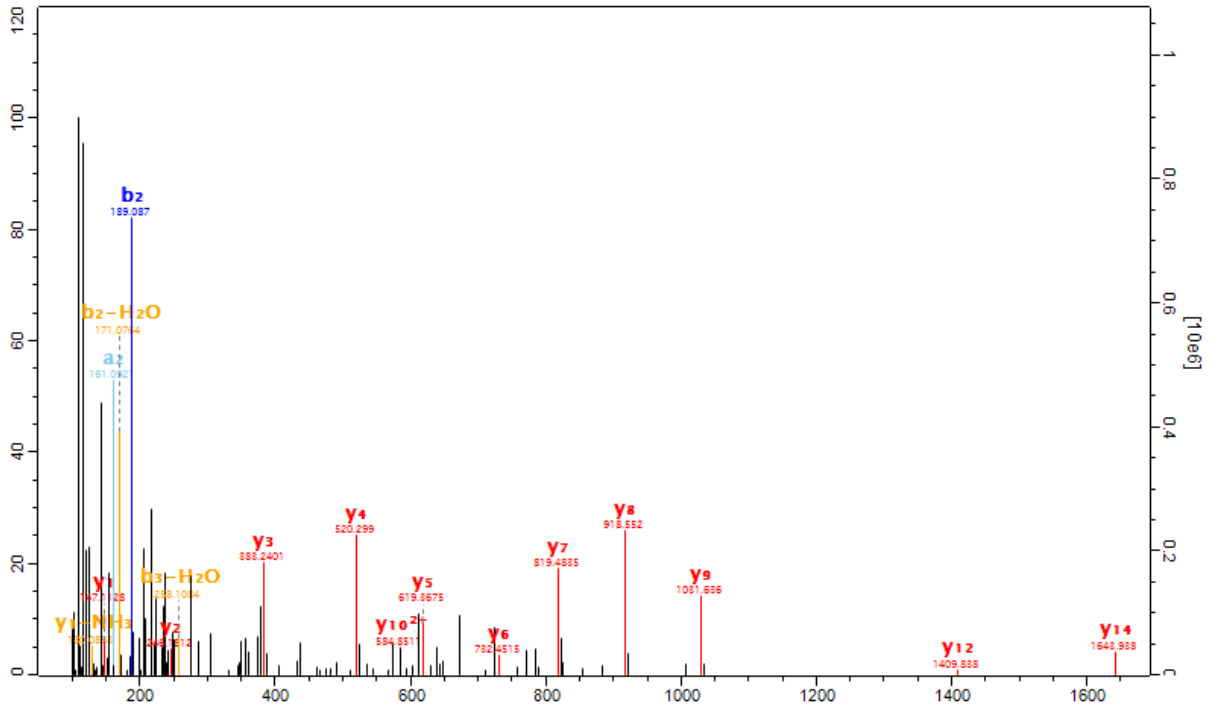

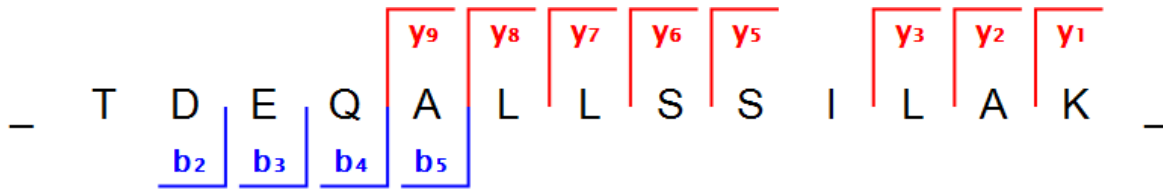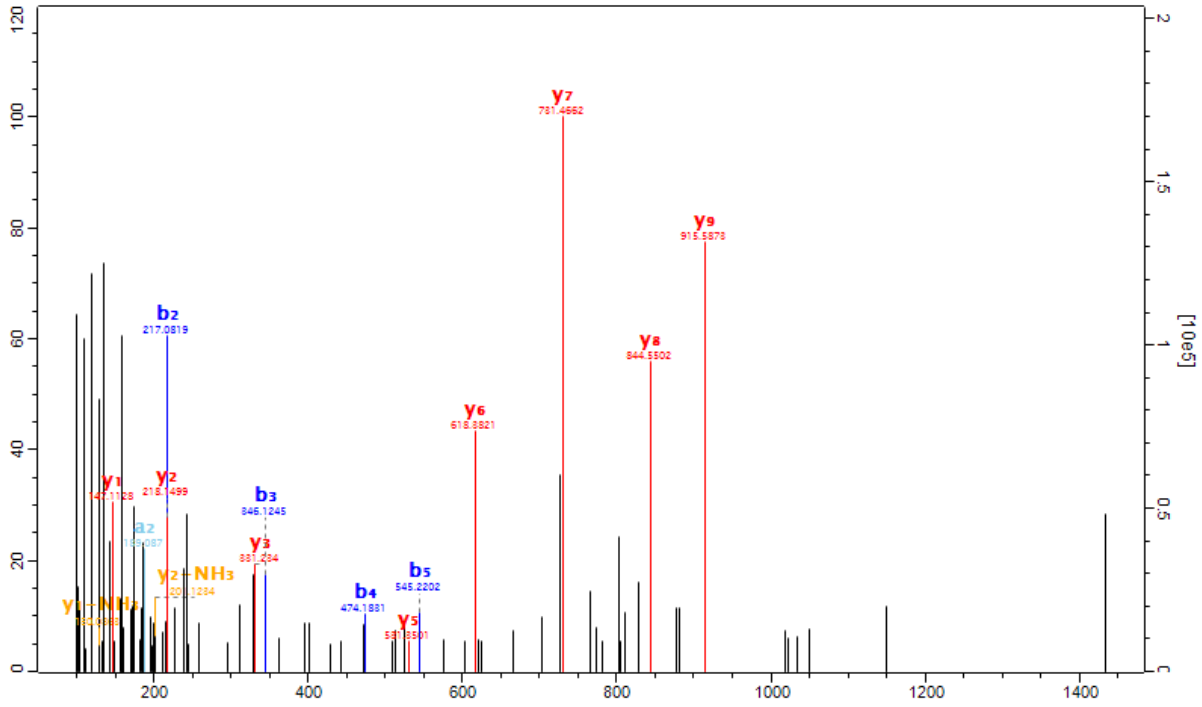

$y_{12}^{2+}$ 
 $y_{11}^{2+}$ 
 $y_{10}$ 
 $y_8^{2+}$ 
 $y_7$ 
 $y_6$ 
 $y_3$ 
 $y_2$ 
 $y_1$

T E L D A H L E N L L S K

$b_2$

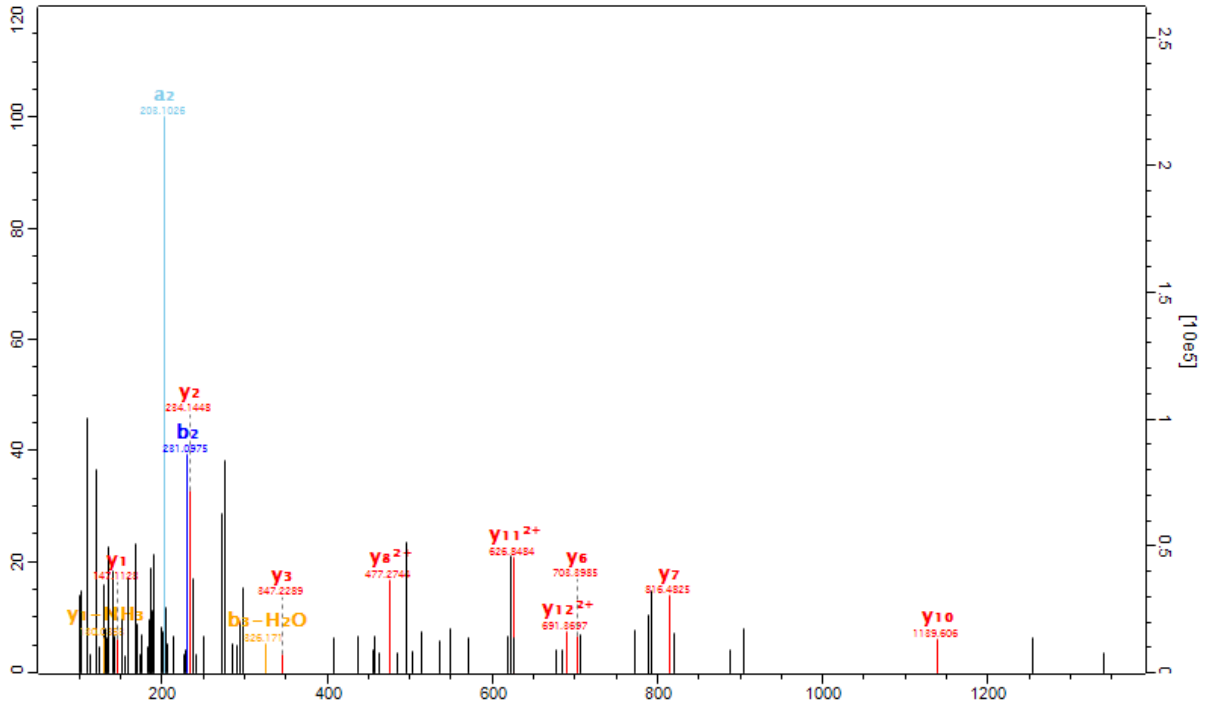

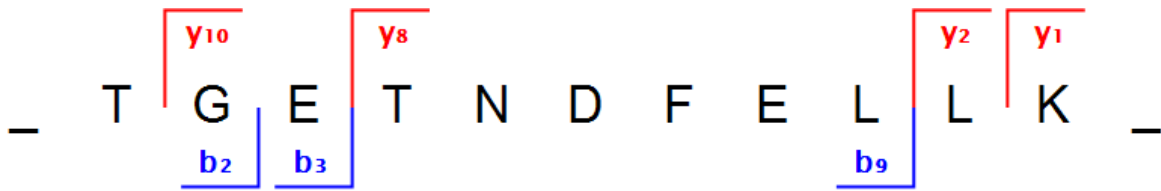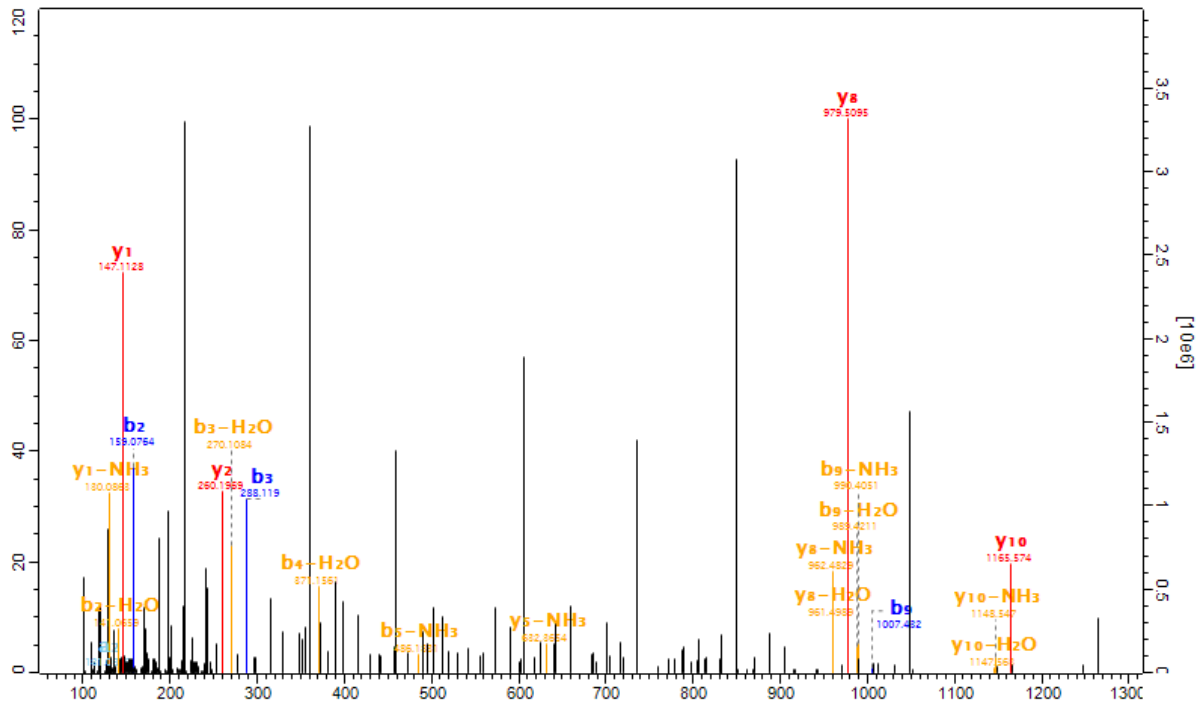



- T G L I P S N Y V A E Q A E S I D N P L H E A A K -  
 b2 b4  
 y22<sup>2+</sup> y2 y20<sup>2+</sup> y17<sup>2+</sup> y14 y13 y11 y9 y8 y7 y4 y1

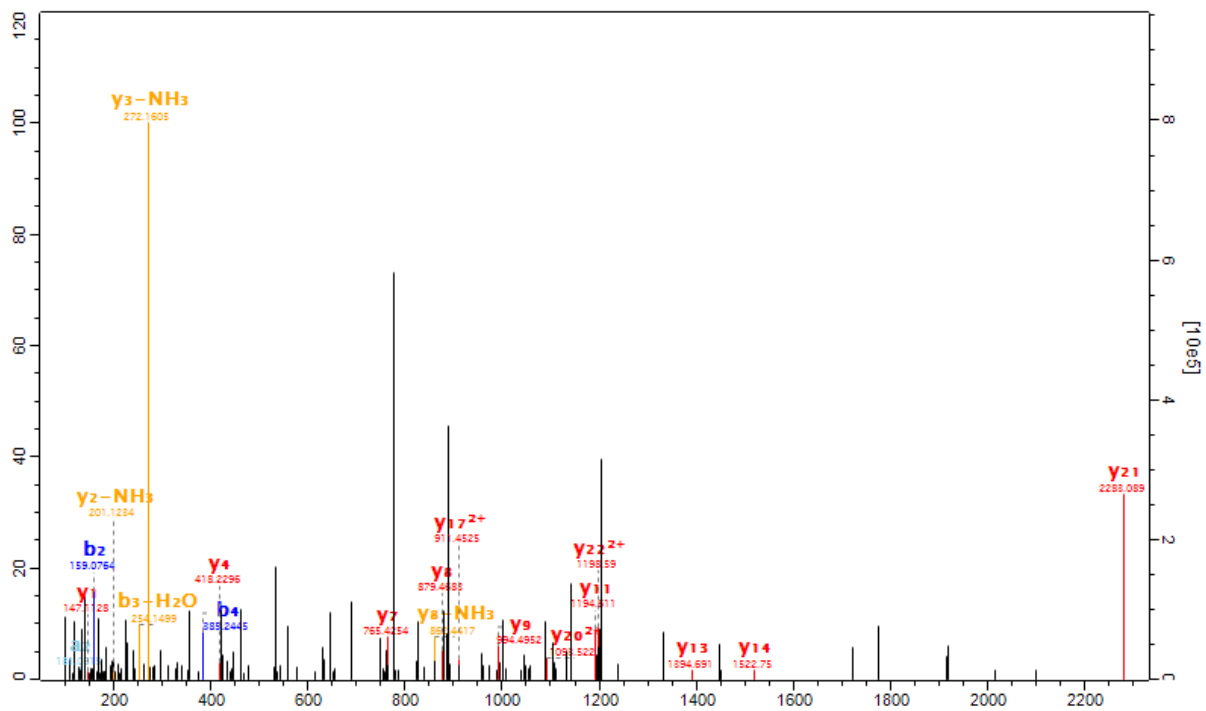

- T I E D A I A V L S V A E E A A D R H P E R -  
 b<sub>2</sub> b<sub>5</sub> b<sub>6</sub> b<sub>7</sub> b<sub>8</sub> y<sub>18</sub> y<sub>17</sub> y<sub>16</sub> y<sub>15</sub> y<sub>14</sub> y<sub>13</sub> y<sub>12</sub> y<sub>11</sub> y<sub>10</sub><sup>2+</sup> y<sub>9</sub><sup>2+</sup> y<sub>5</sub> y<sub>4</sub> y<sub>3</sub> y<sub>1</sub>

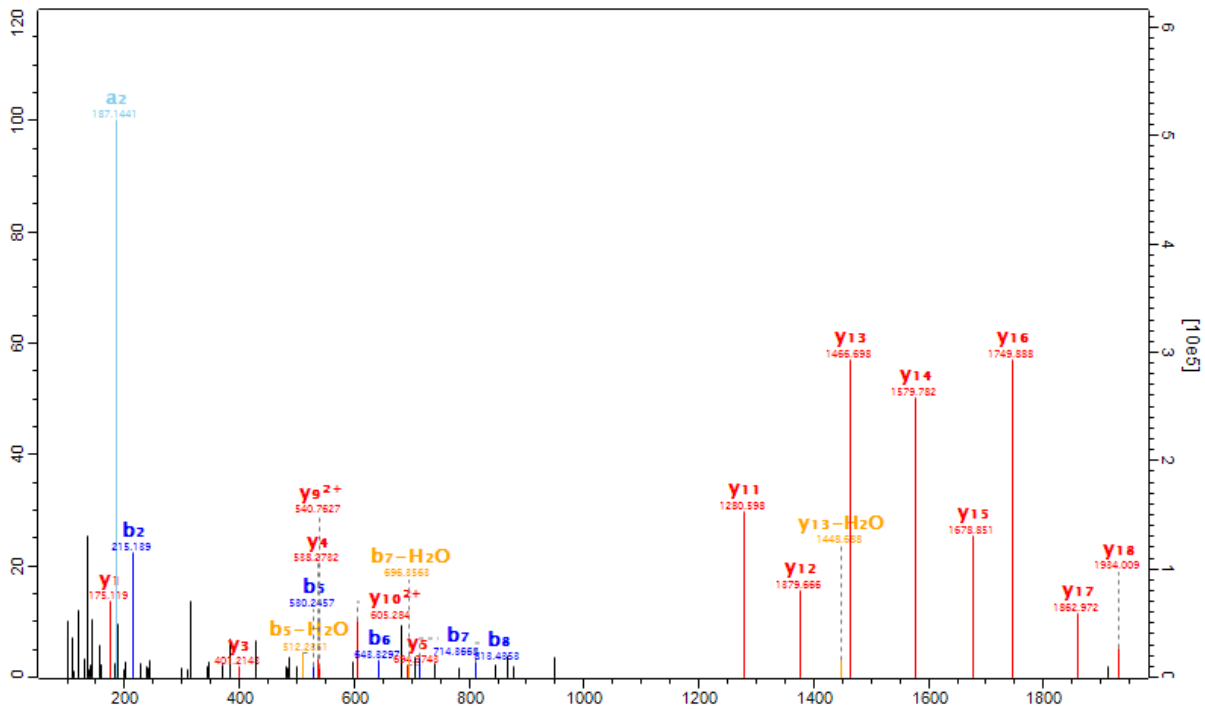

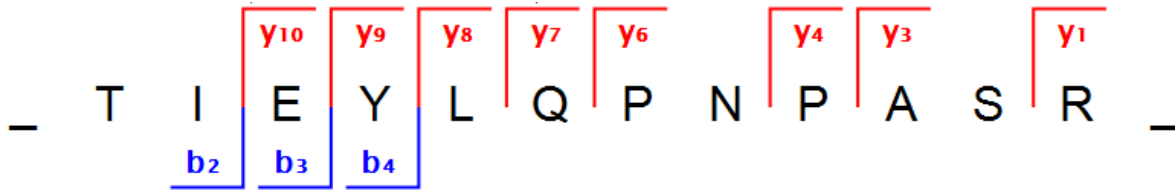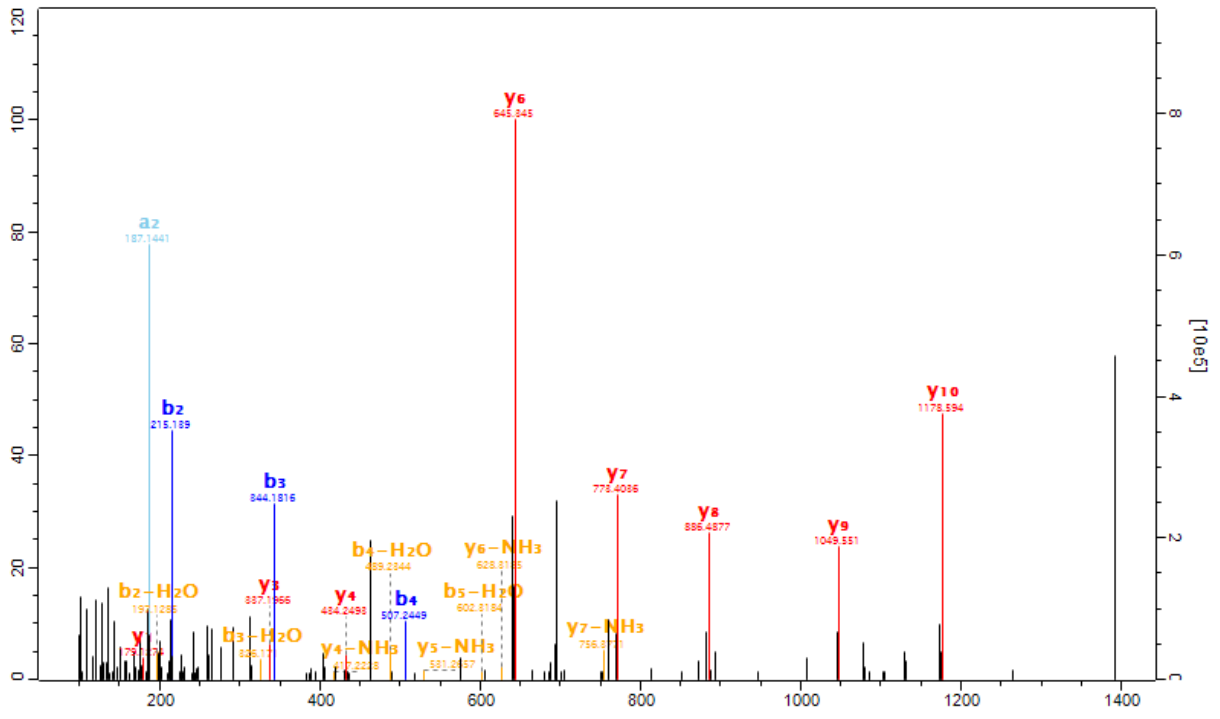

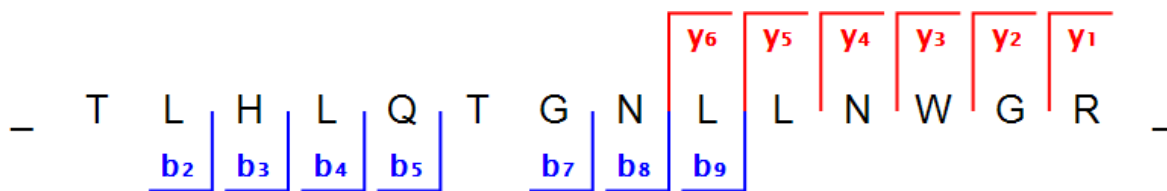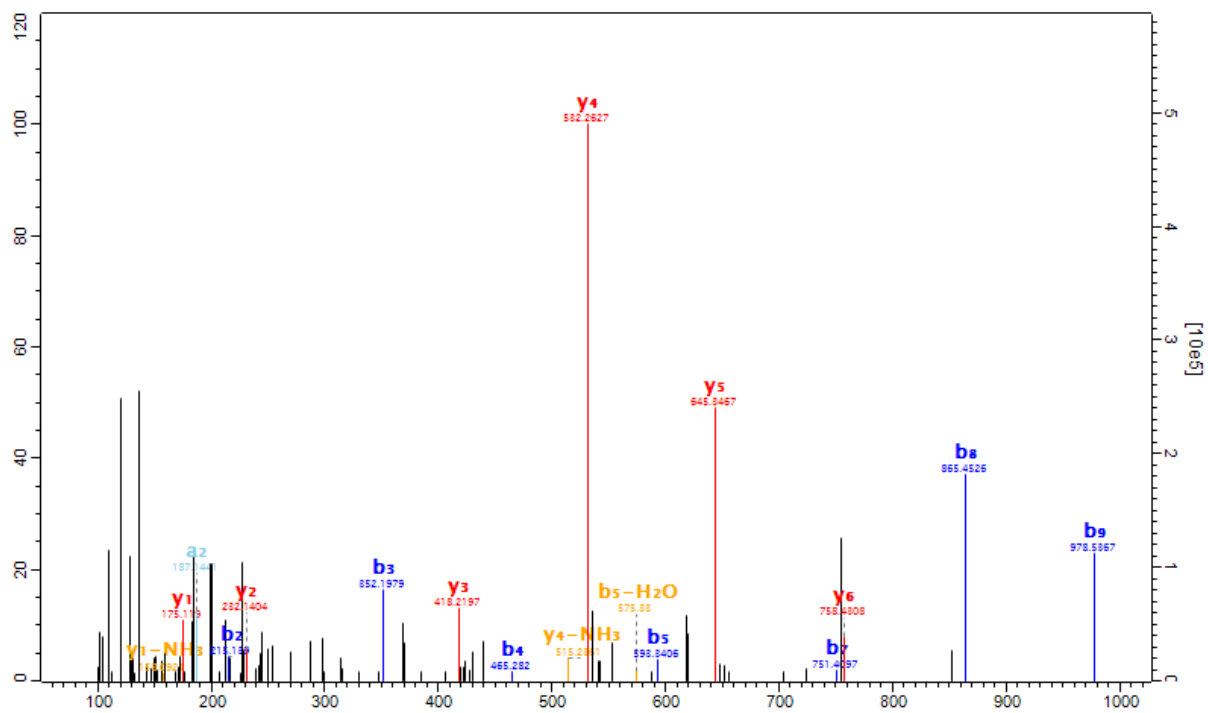

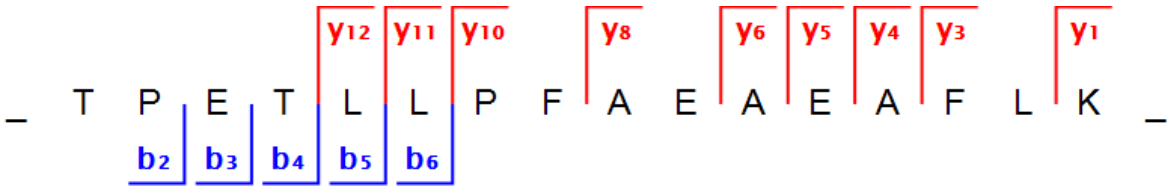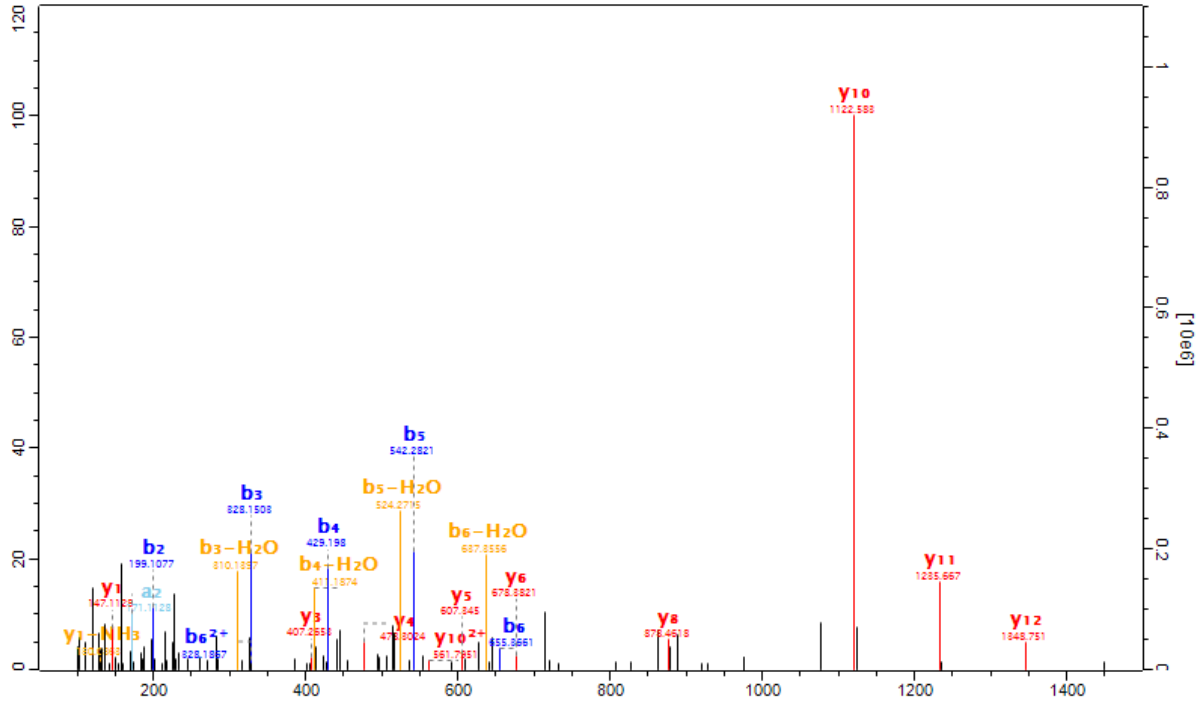

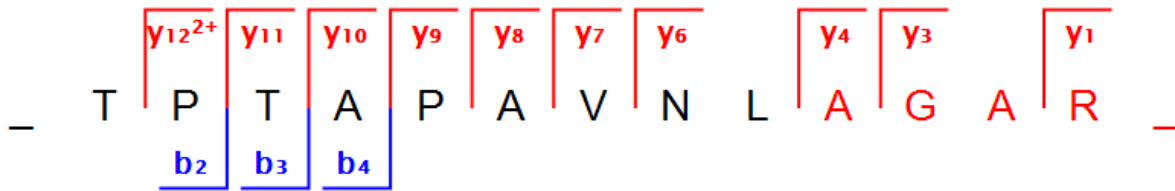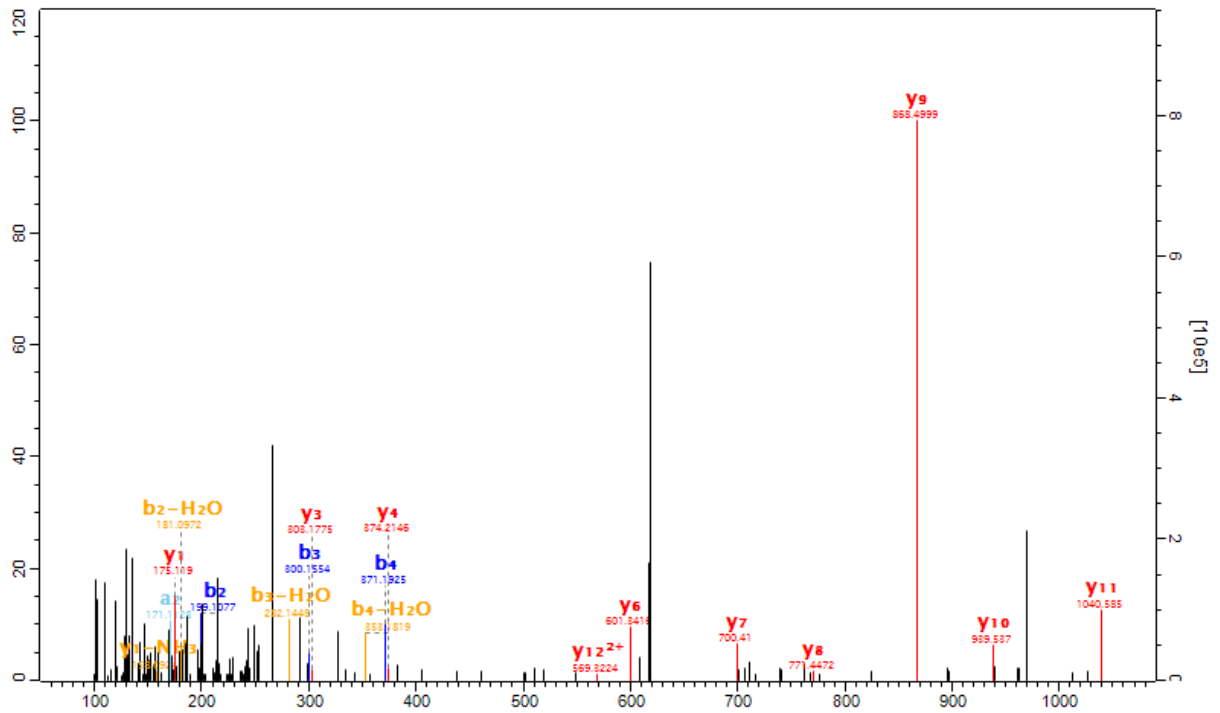

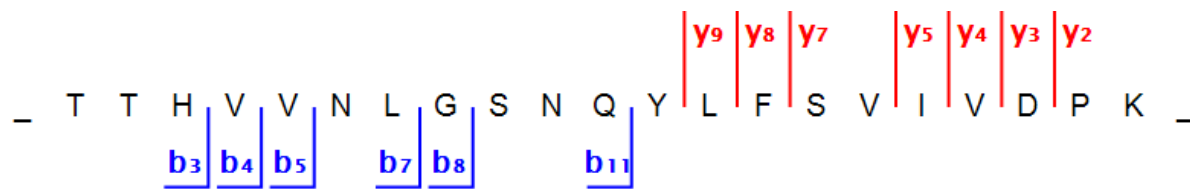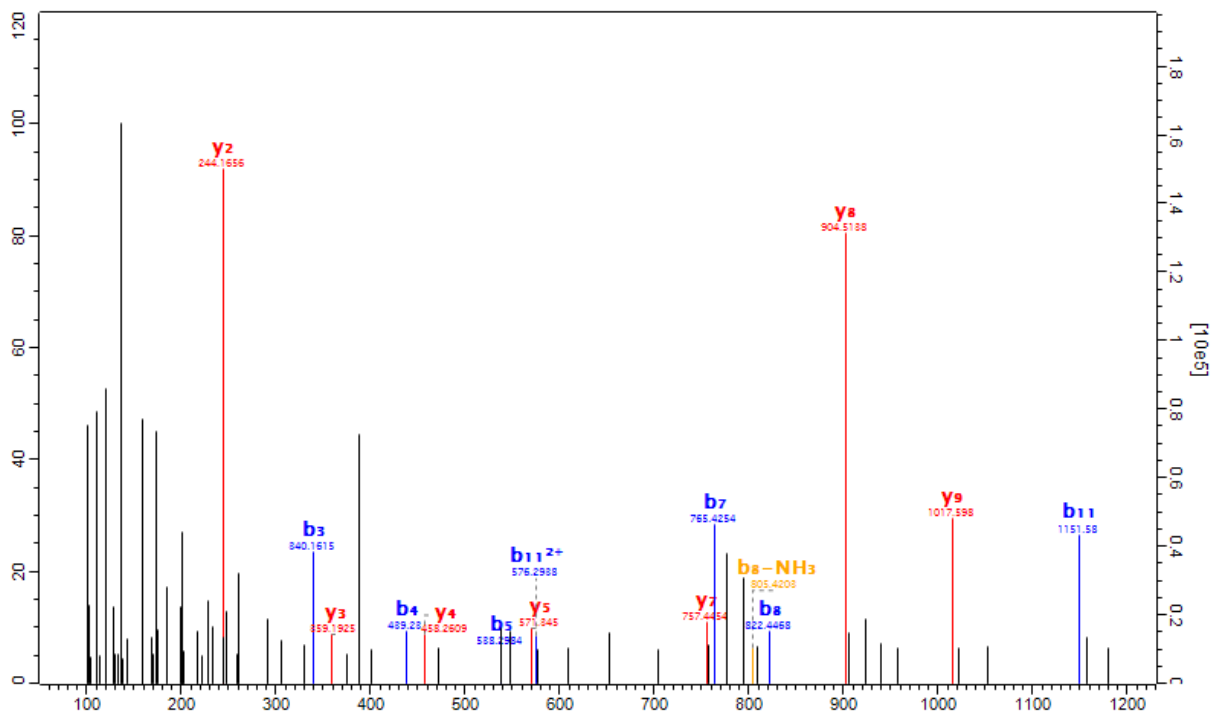

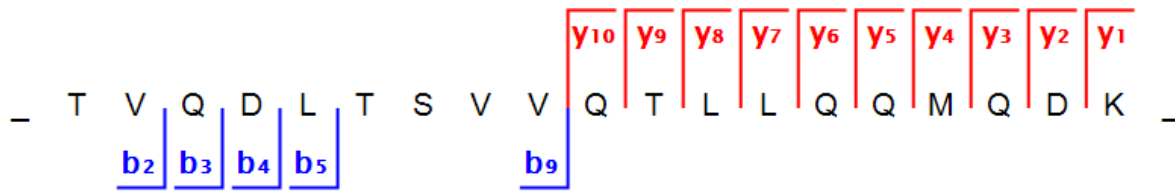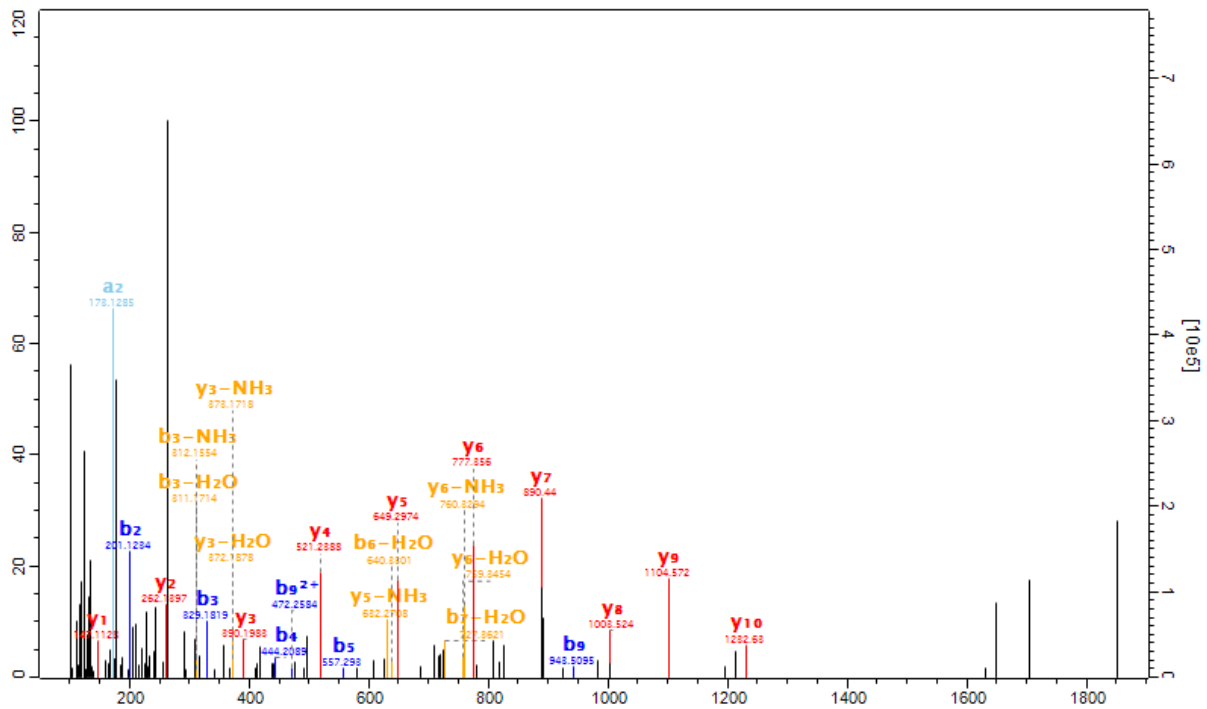



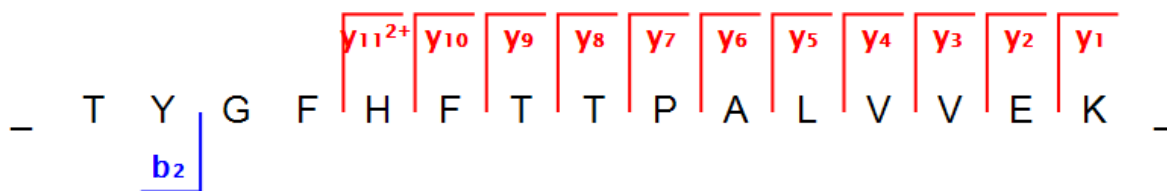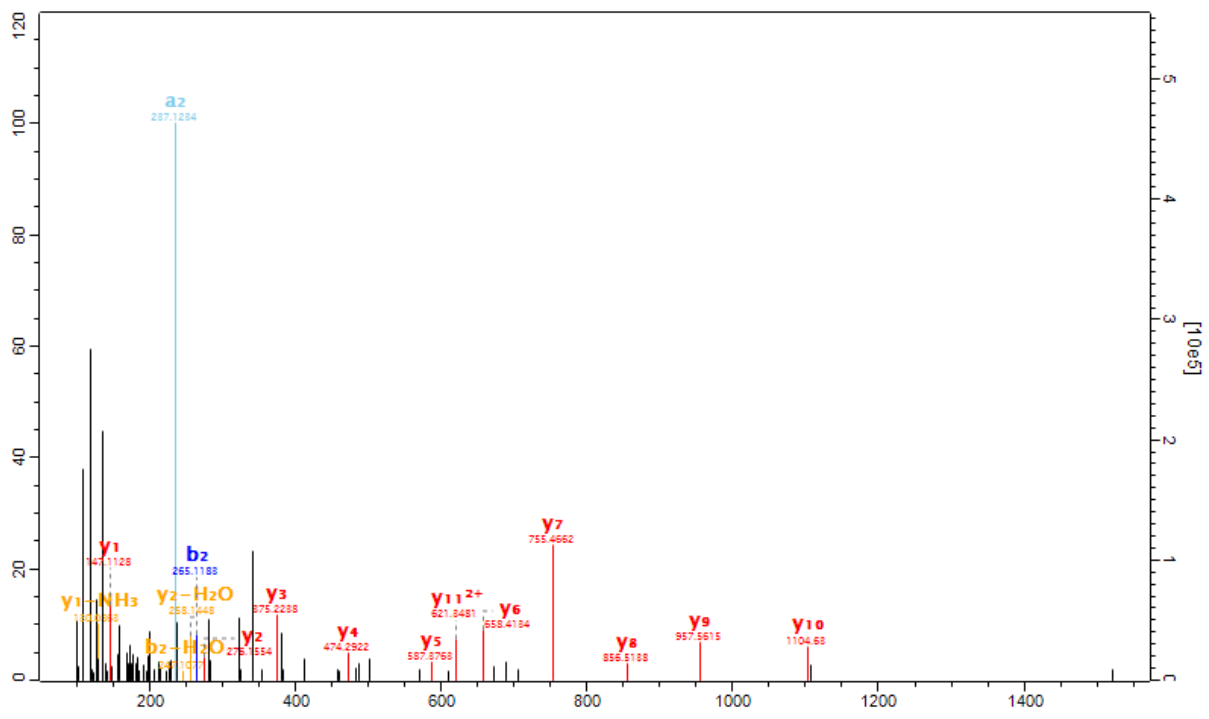

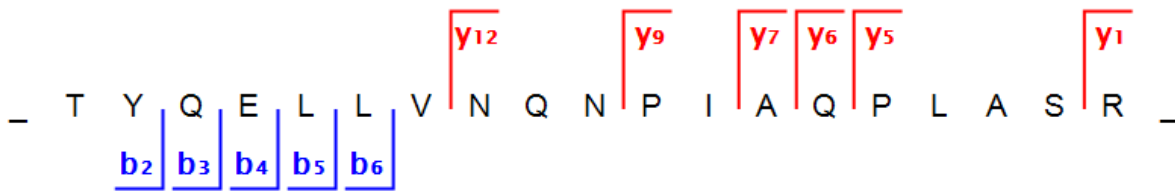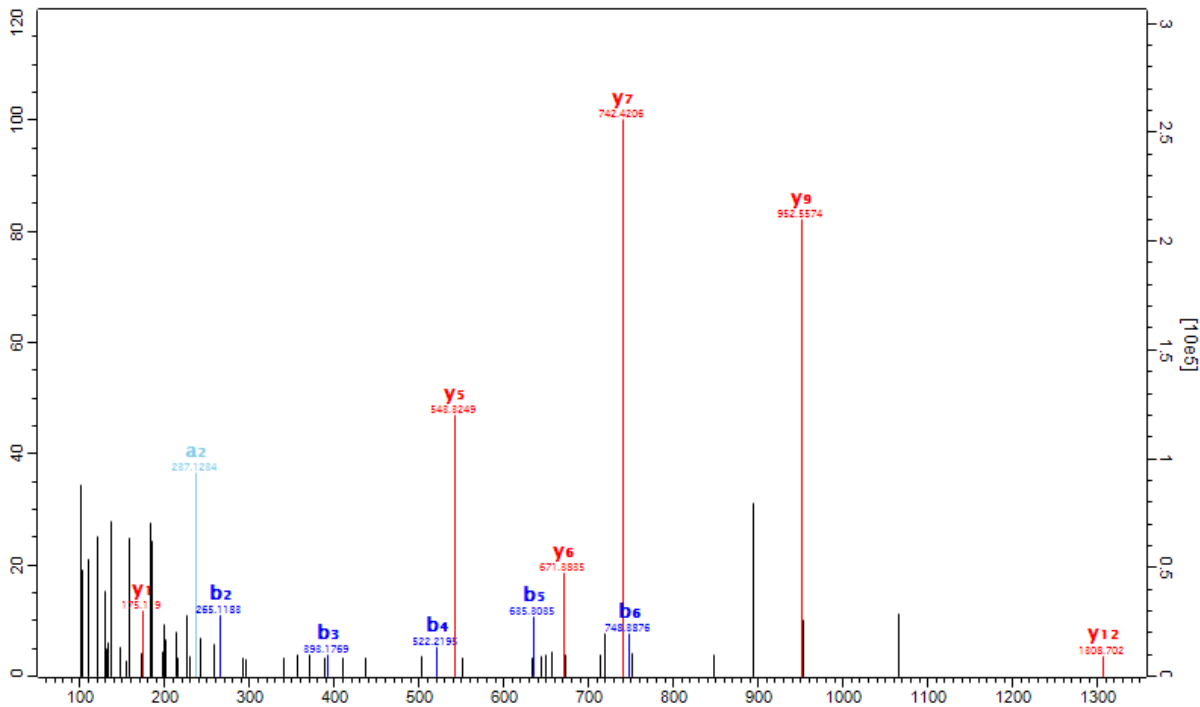

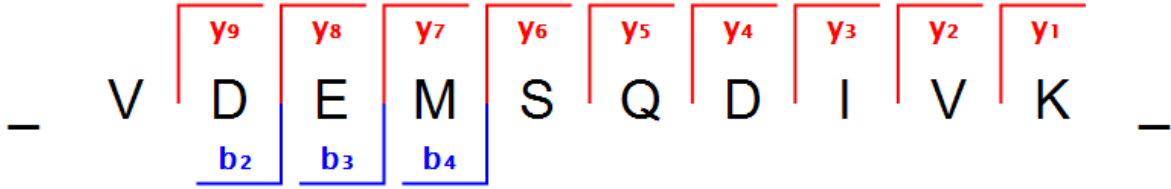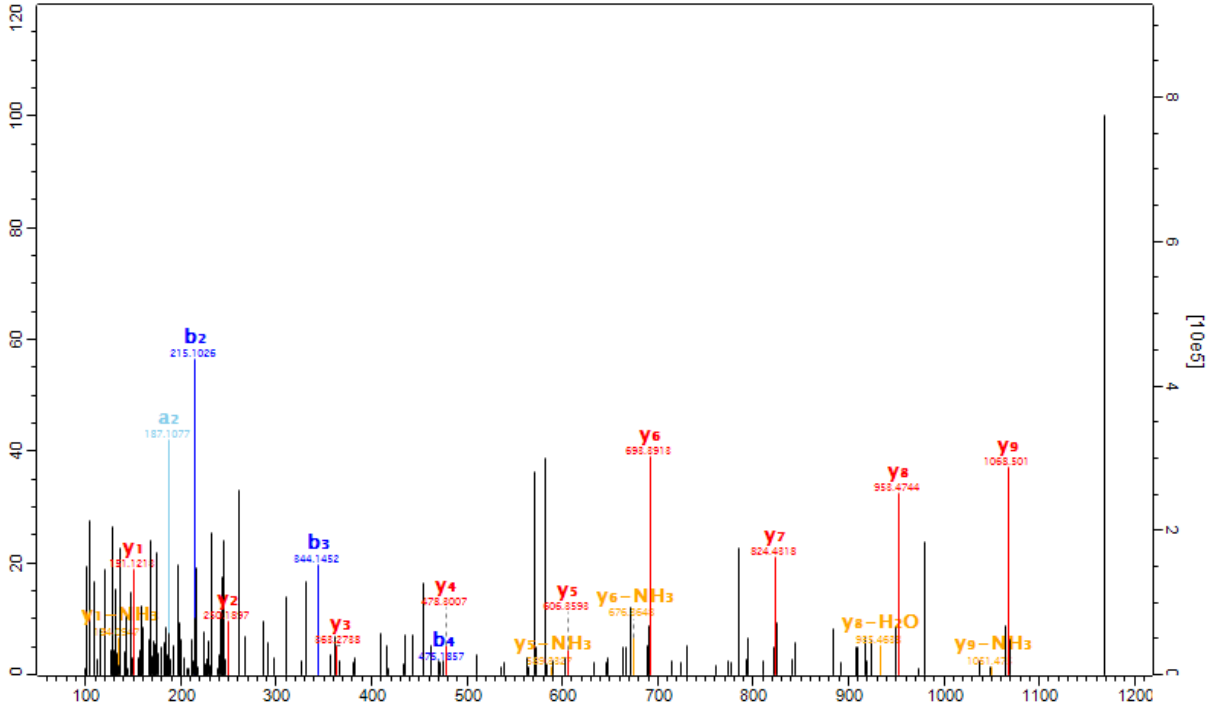

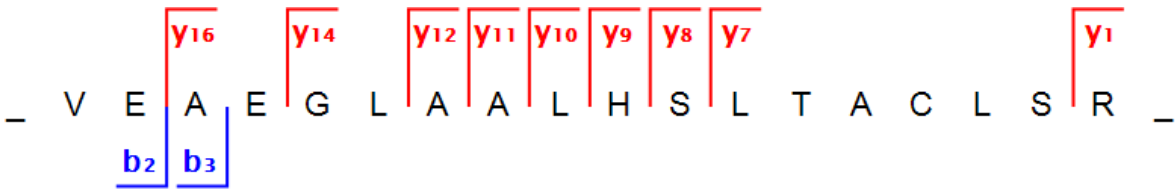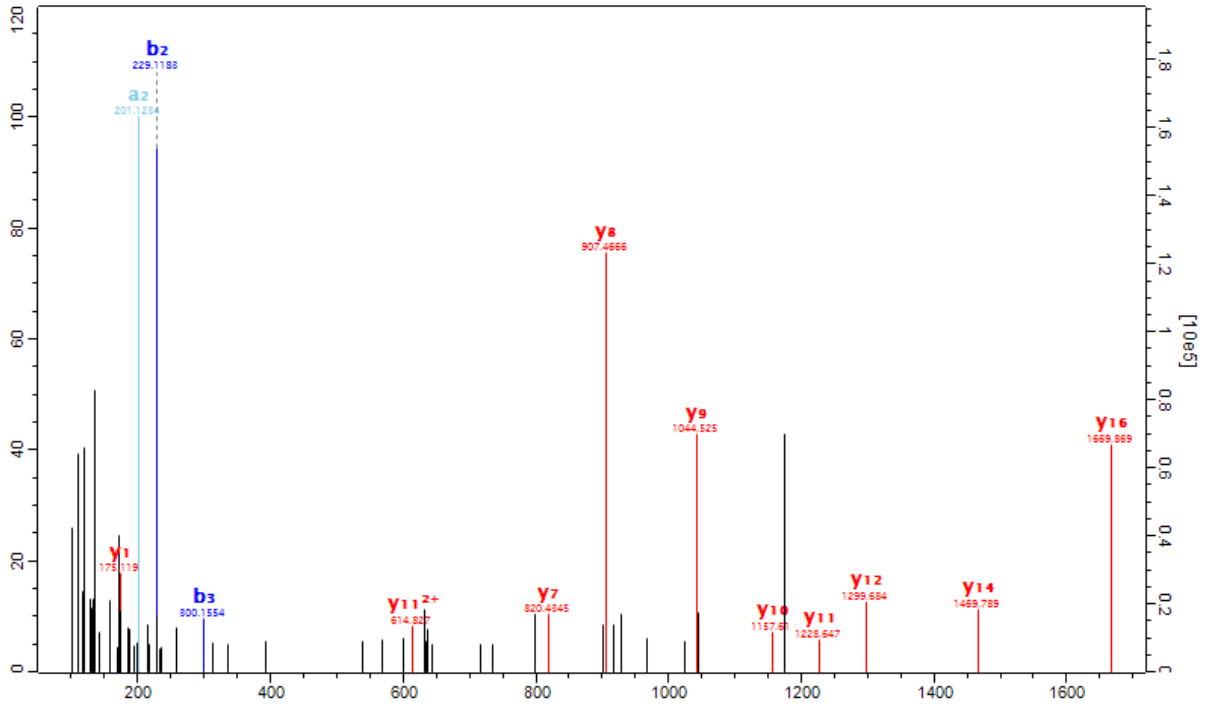

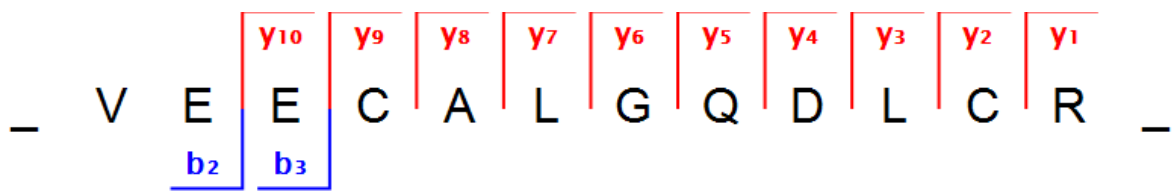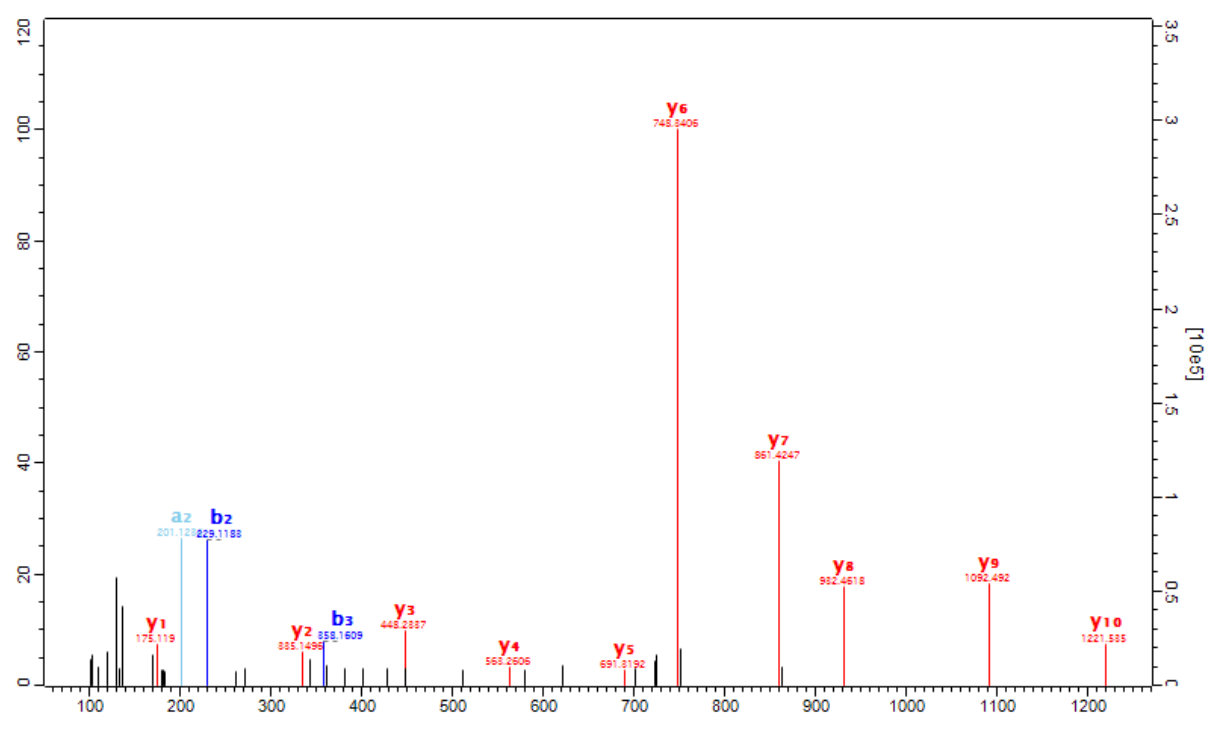

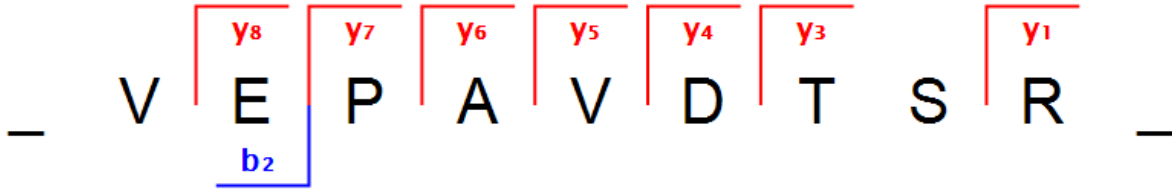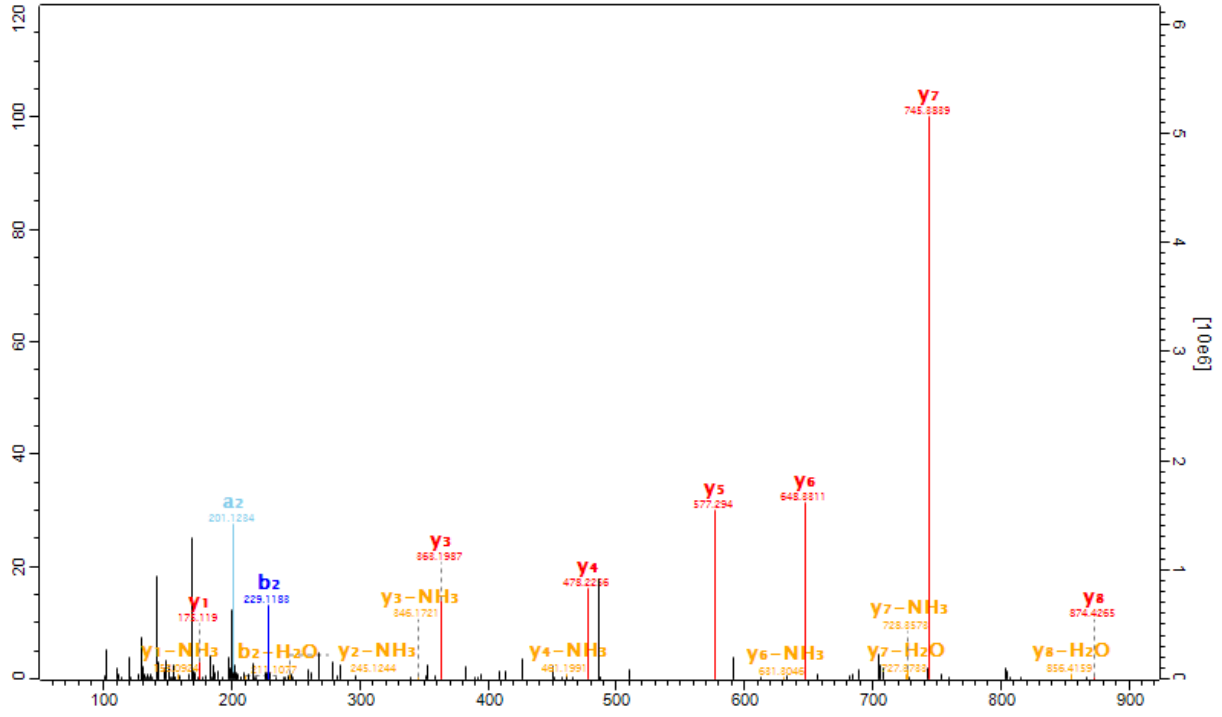

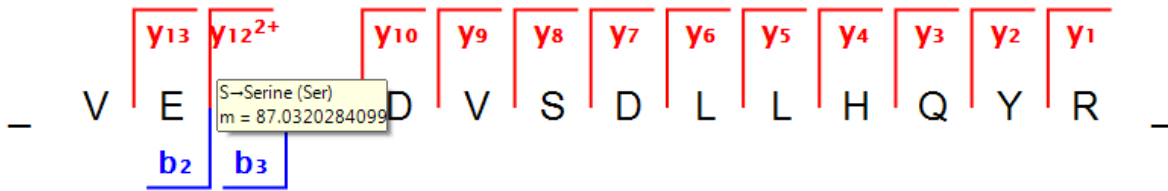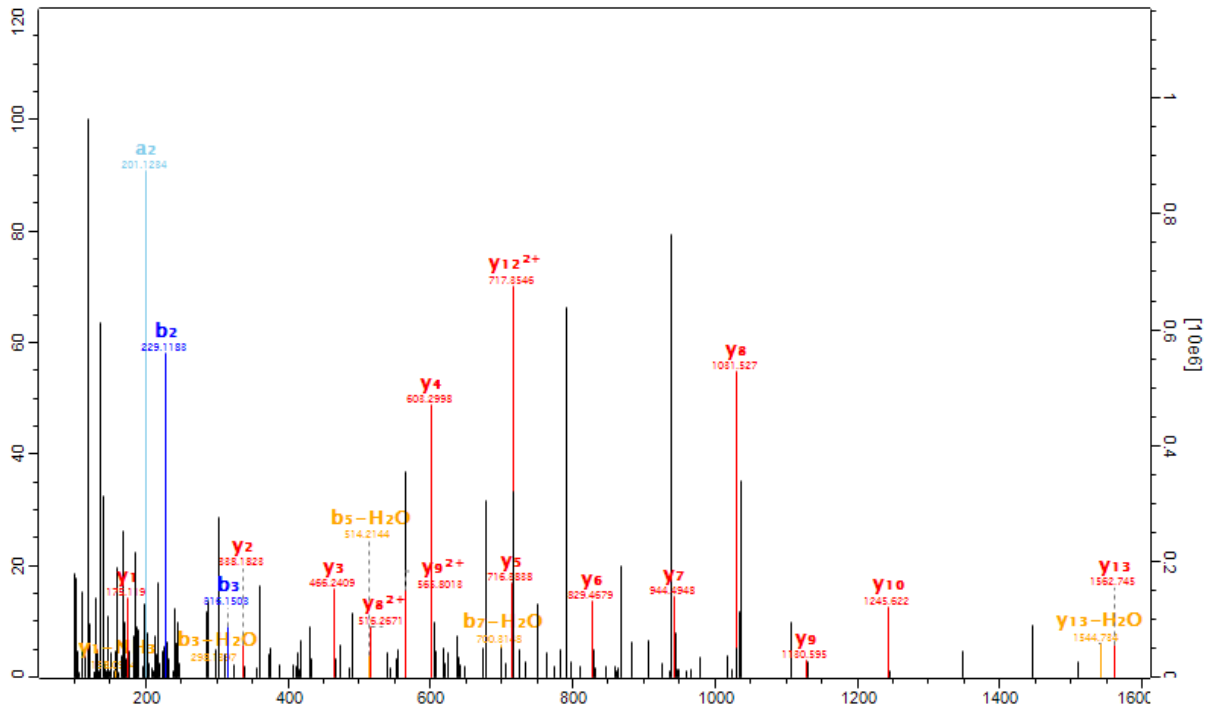

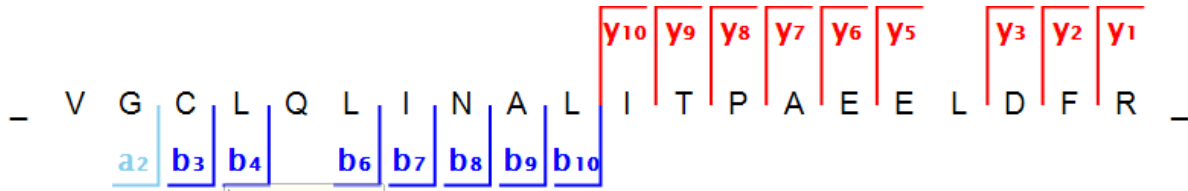

b4  
 type: Regular  
 mass: 430.2119

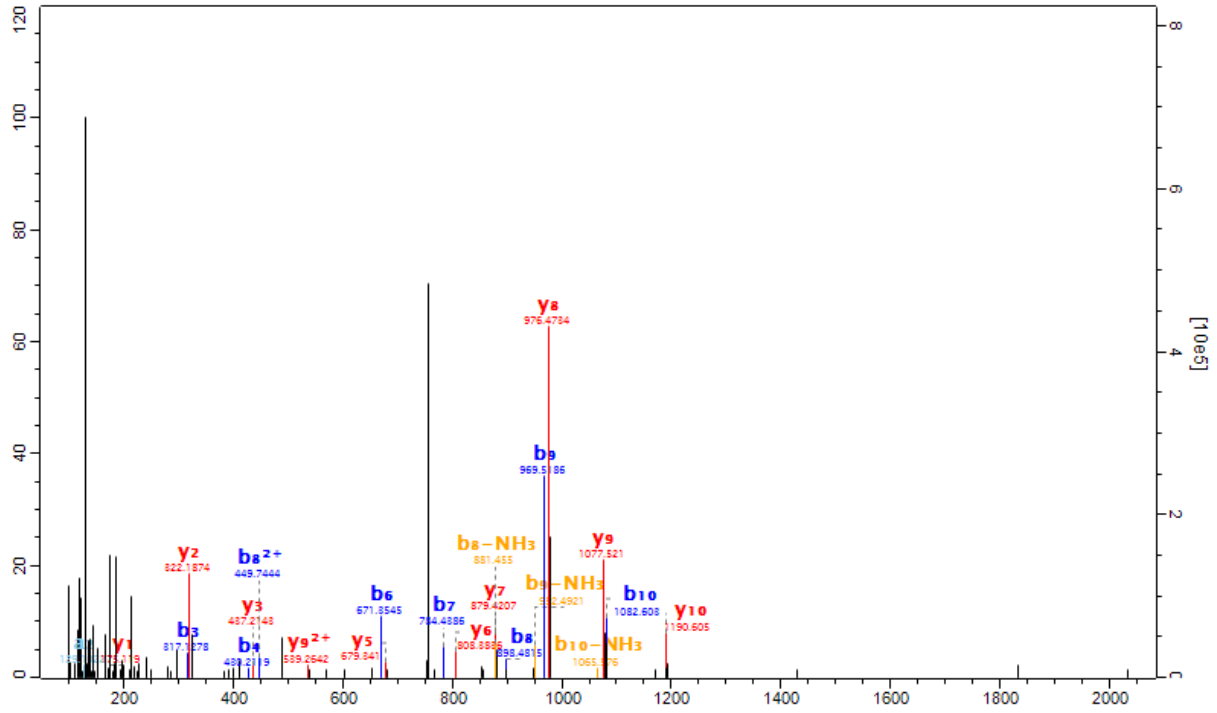





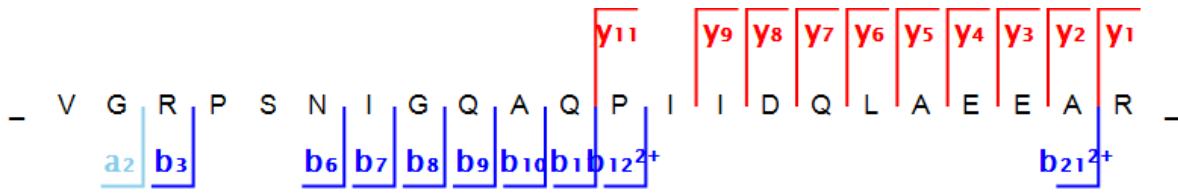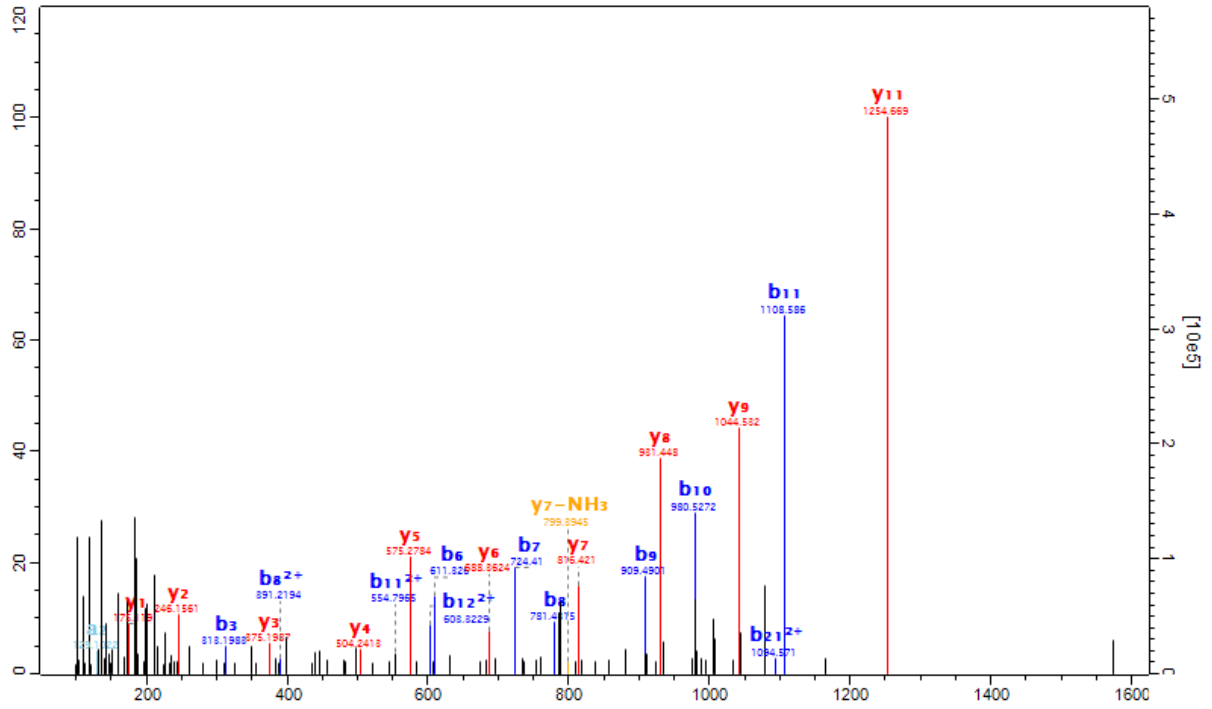

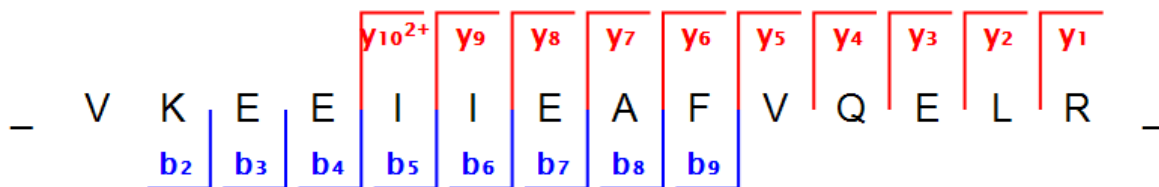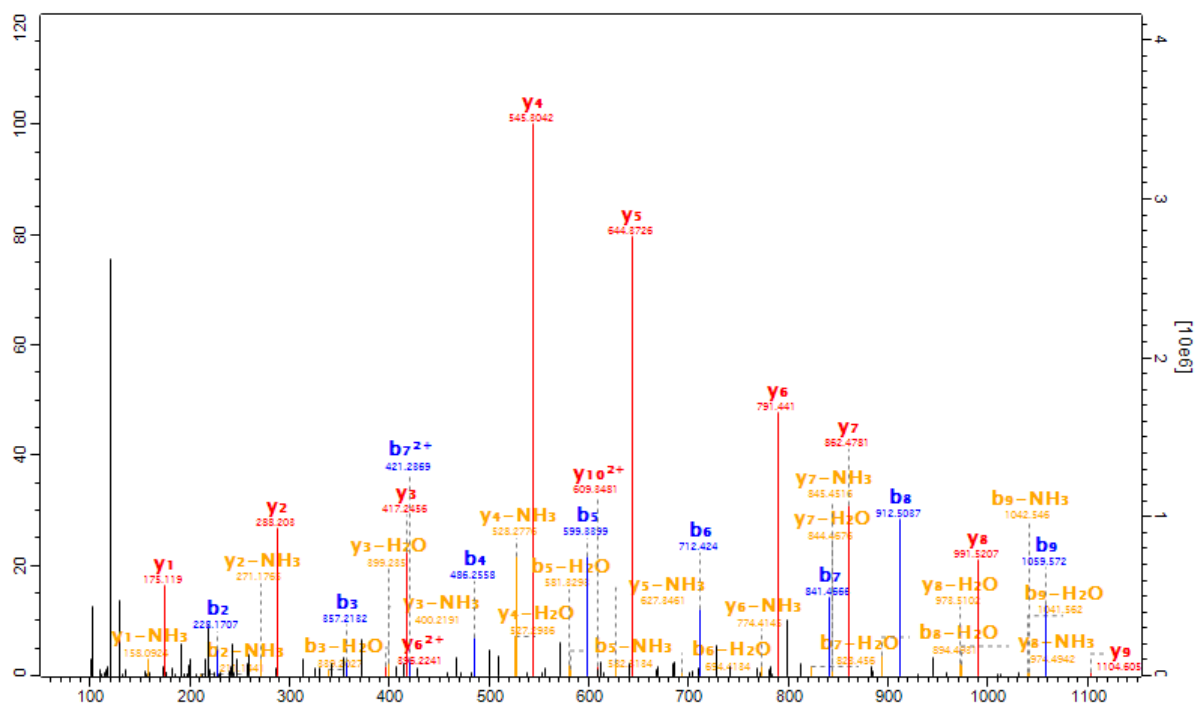

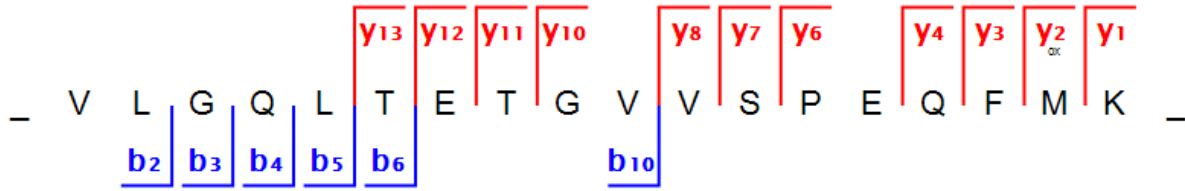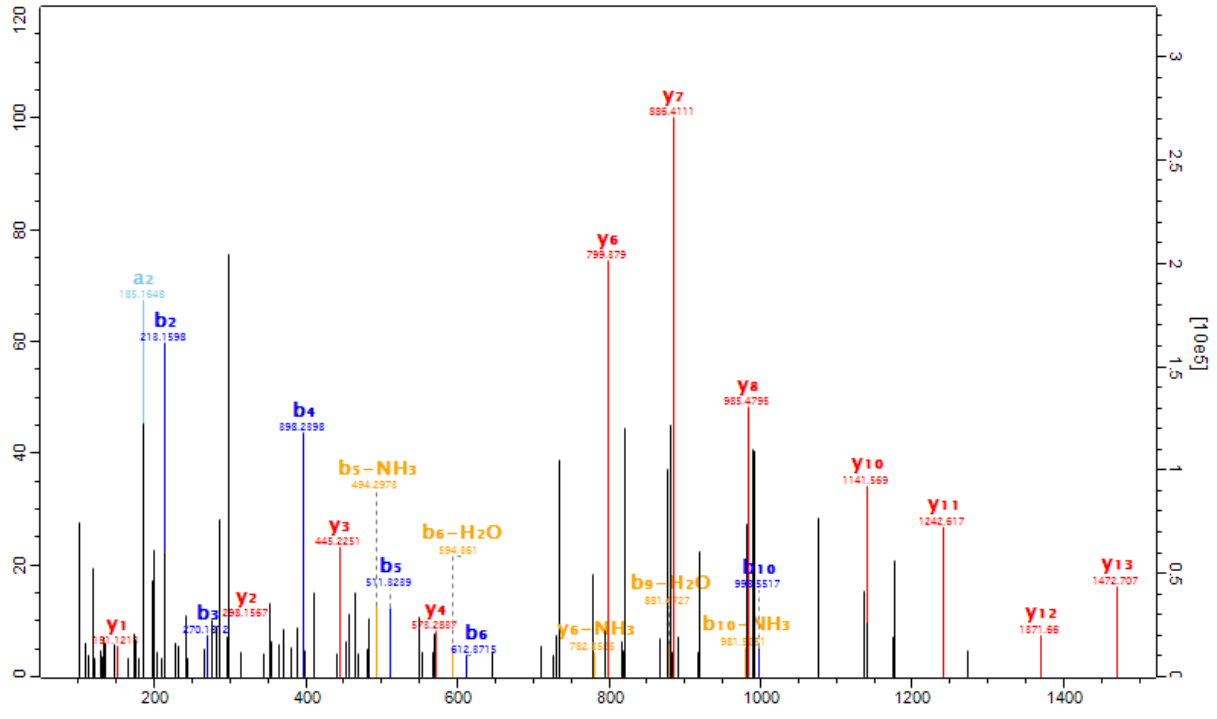

- V L G S E P A P V S A E T L L S Q A V E Q L R -  
 b2 b3 b5 b7 b9 b10 b12 b13 b14 y9 y8 y7 y6 y5 y4 y3 y2 y1

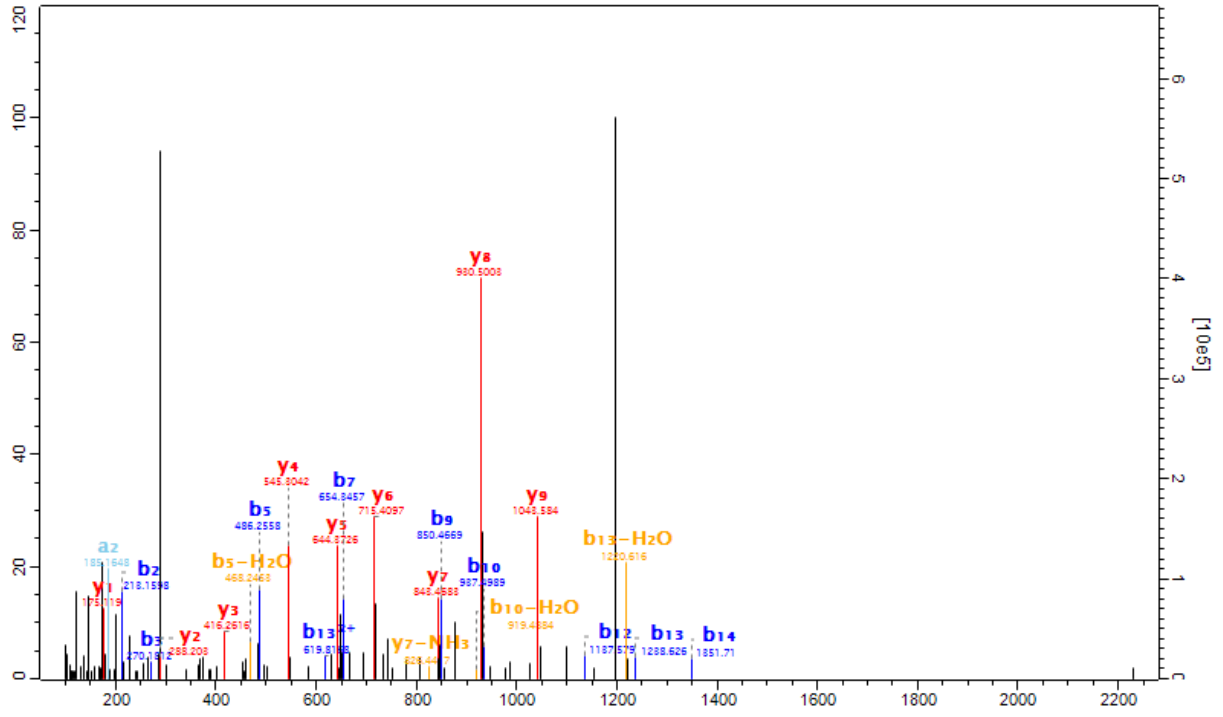

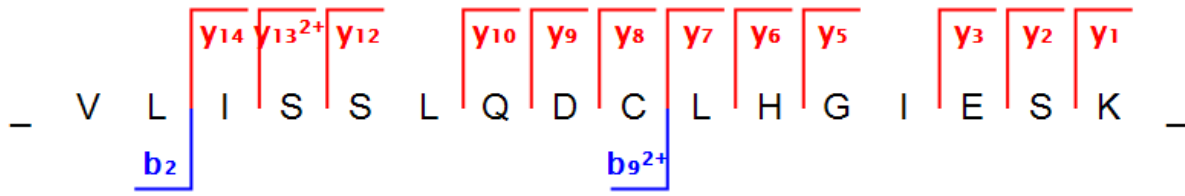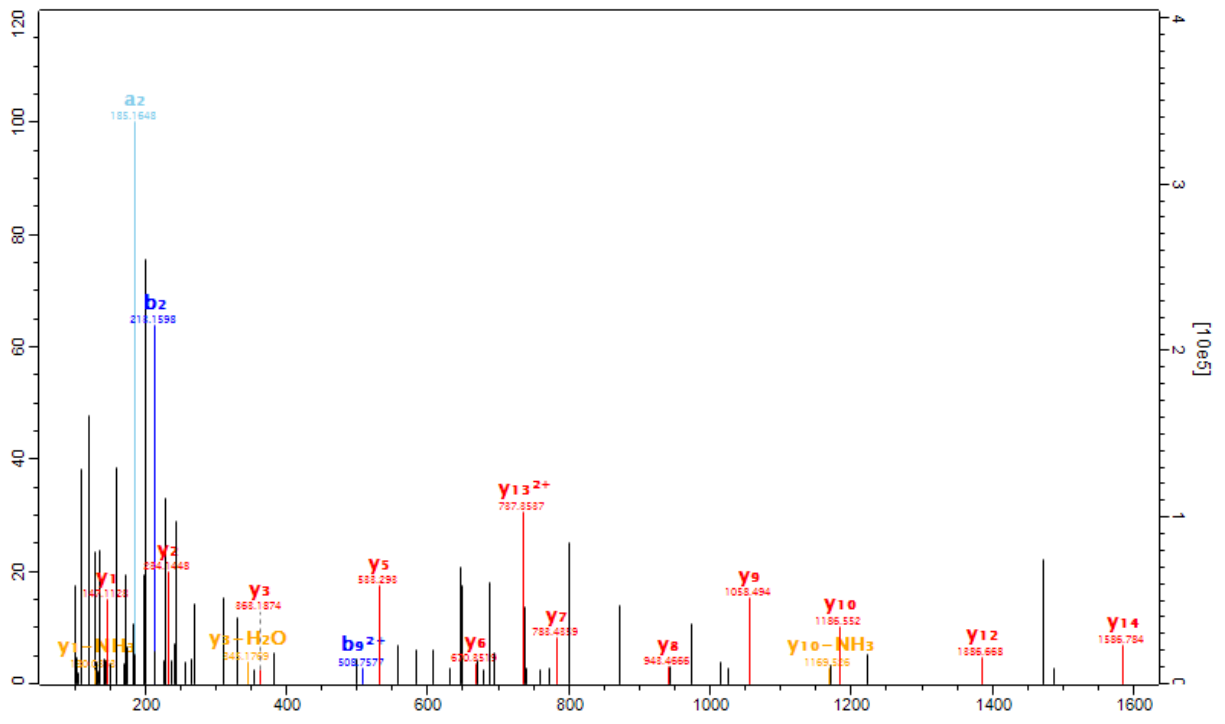

- V L S V P E S T P F T A V L K -  
b2 b3

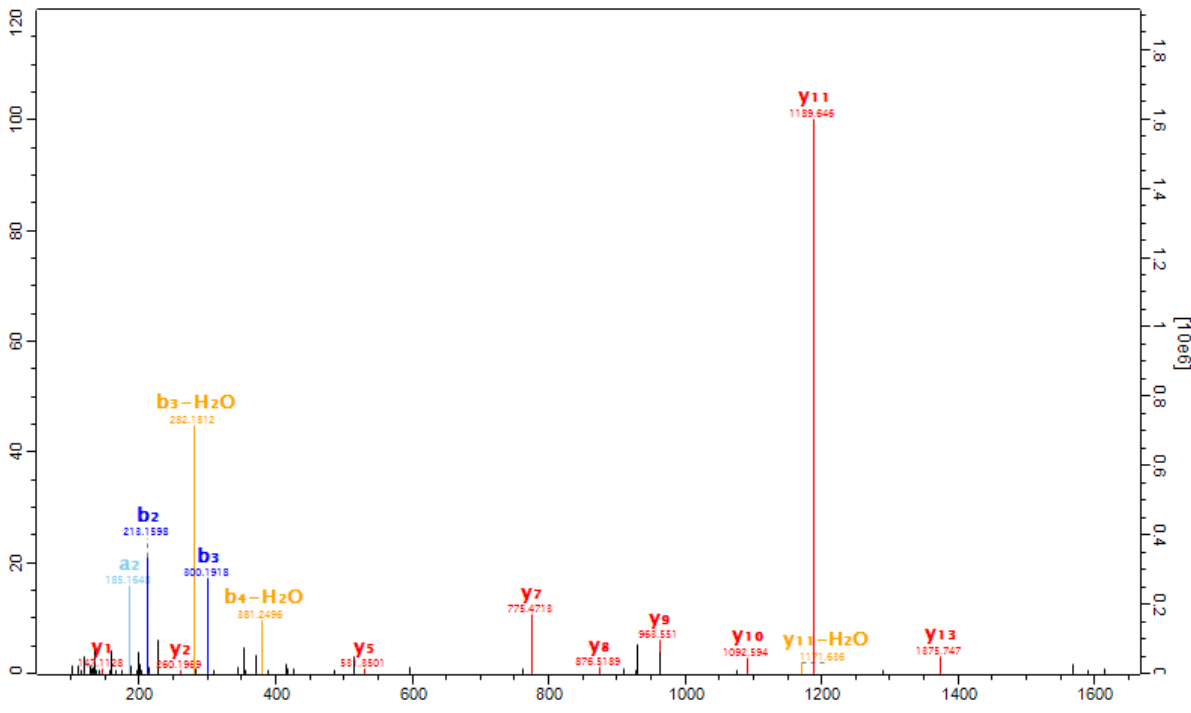

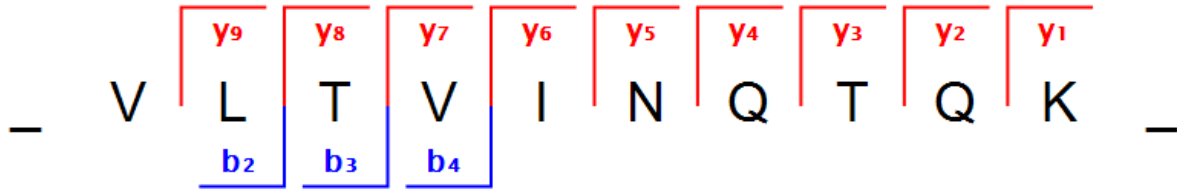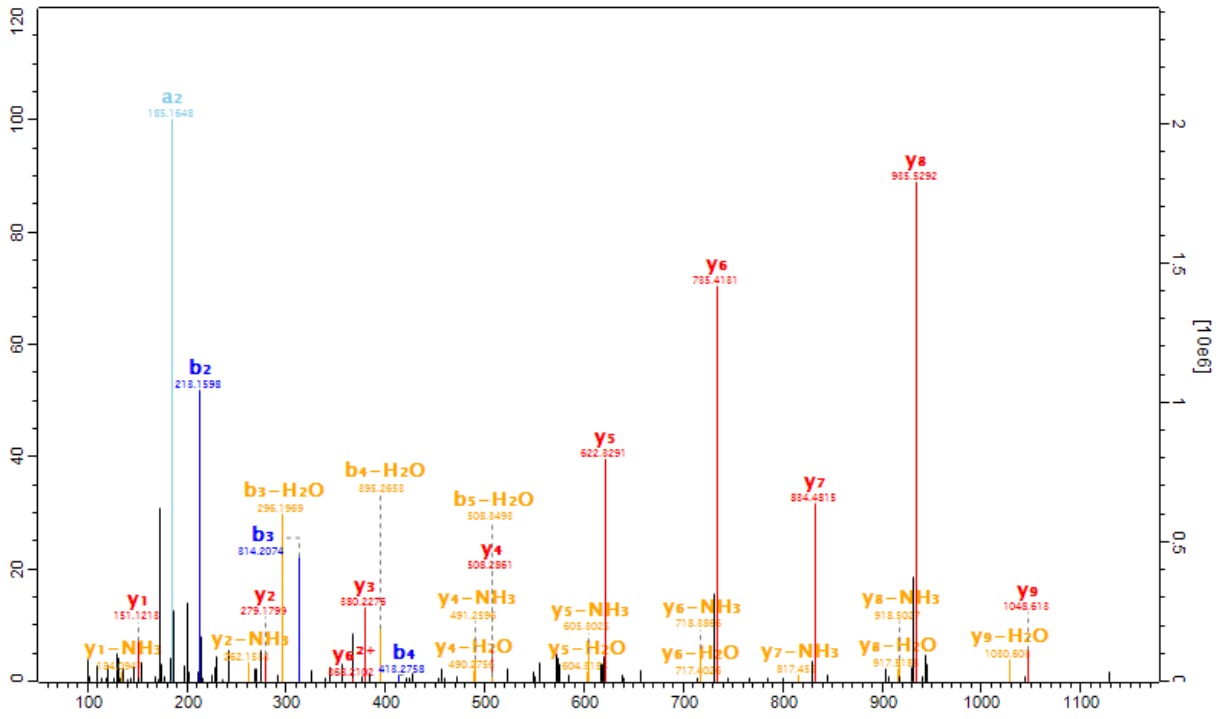



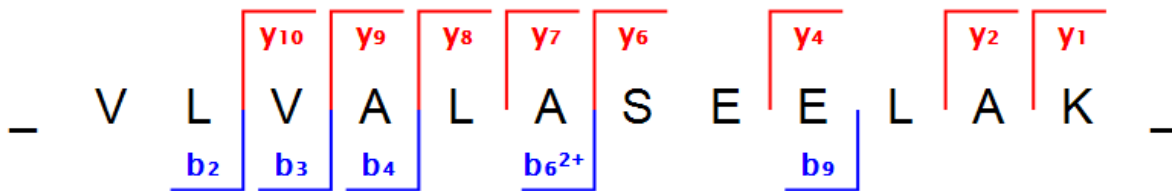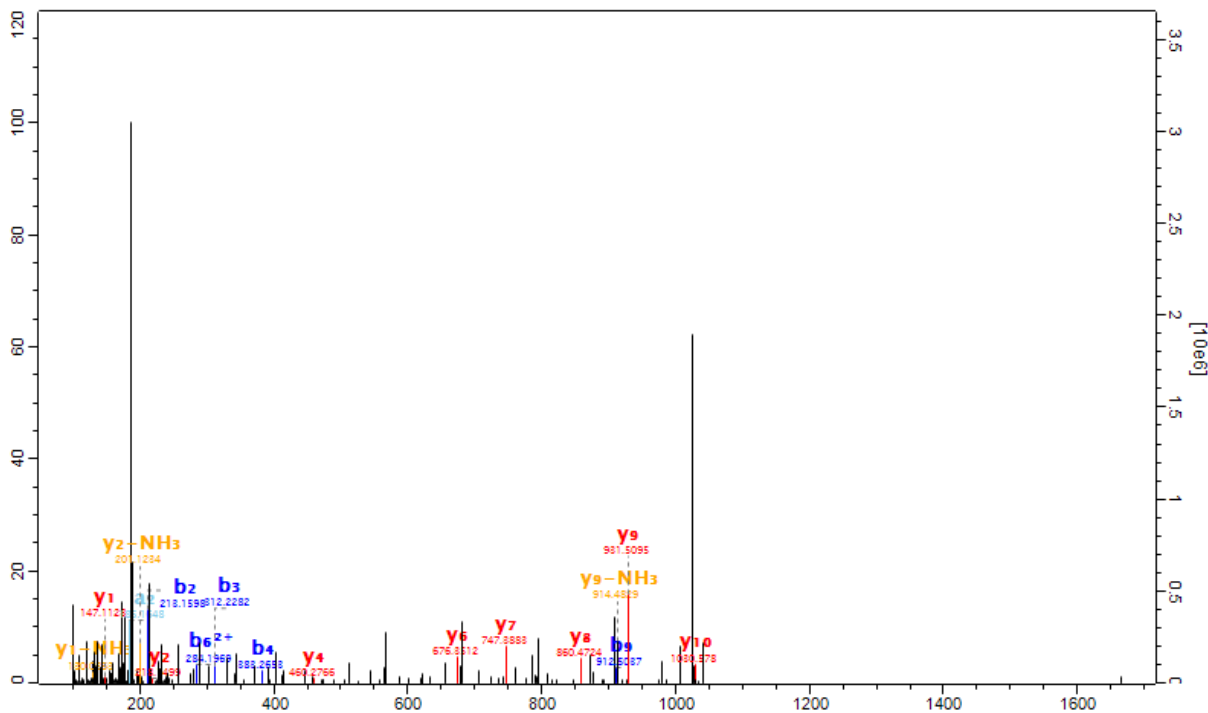

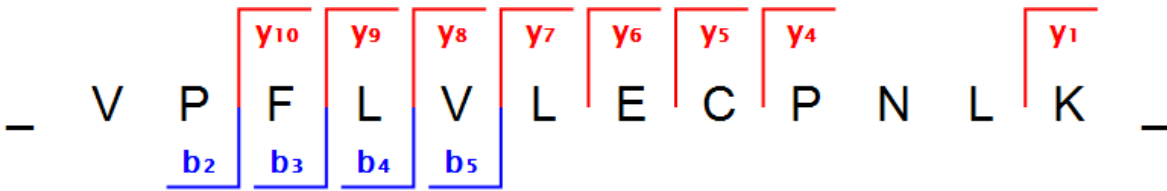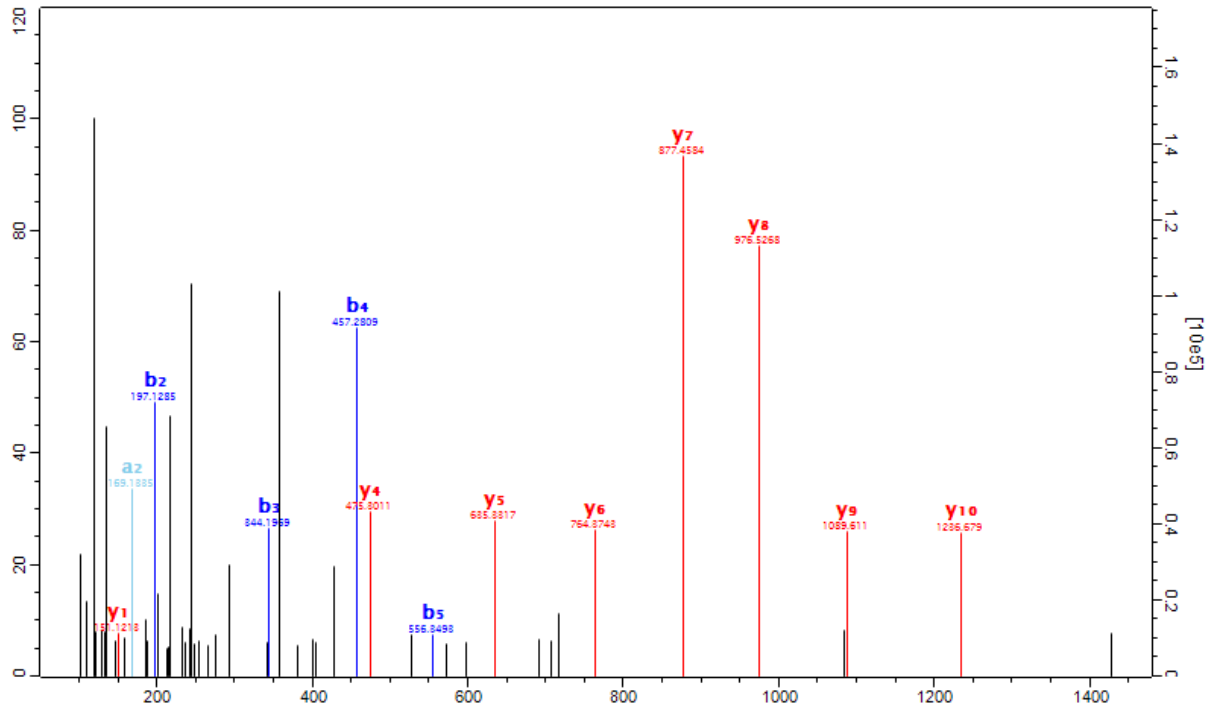

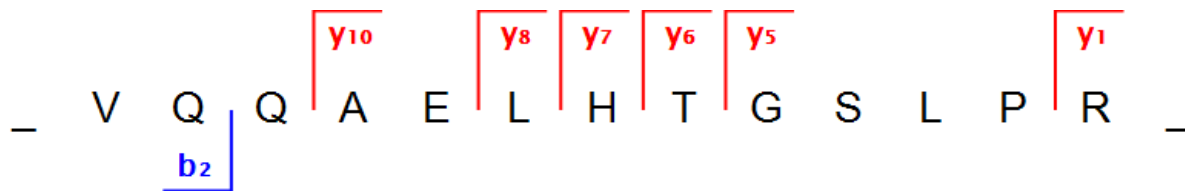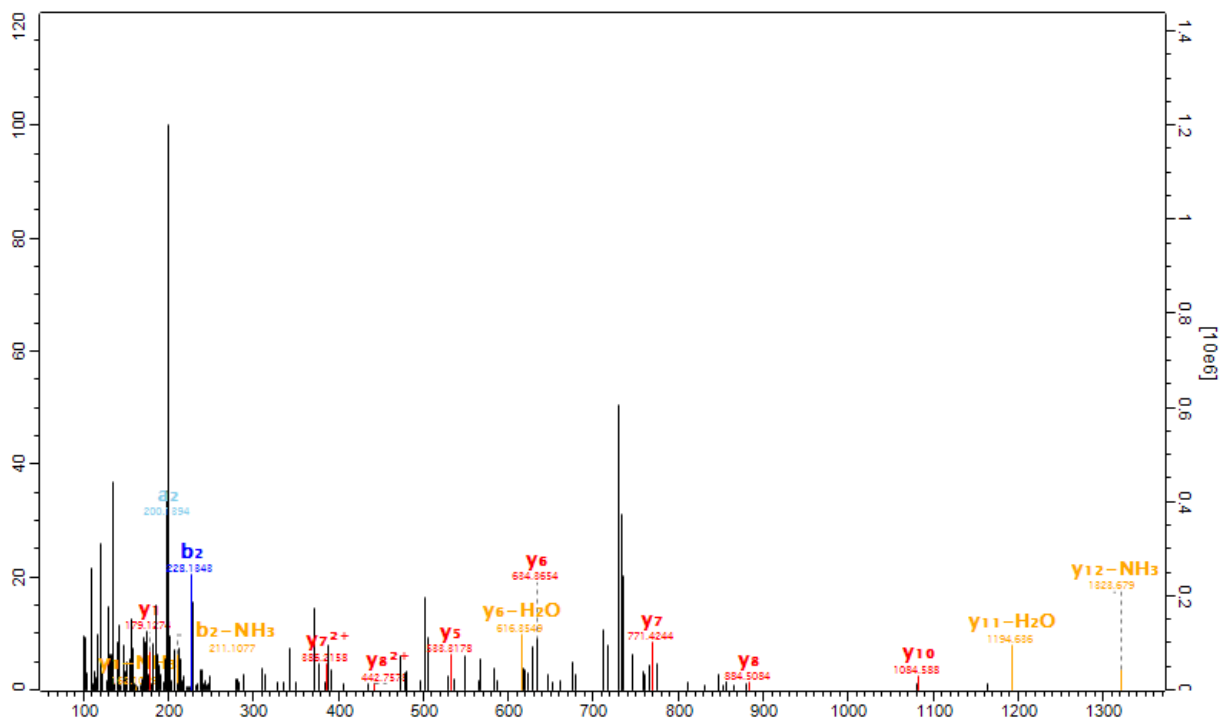

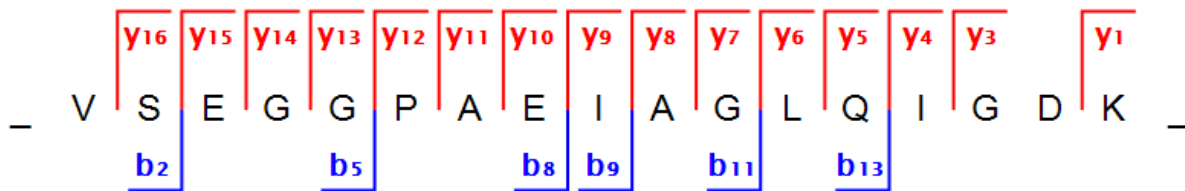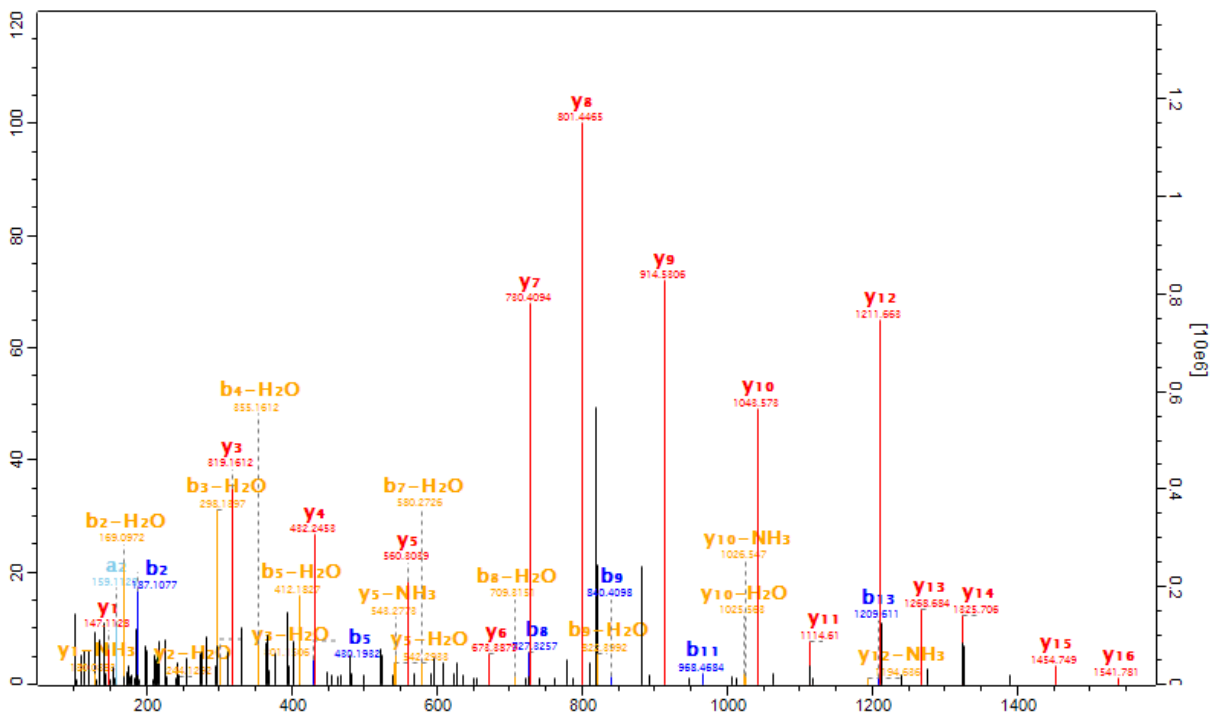

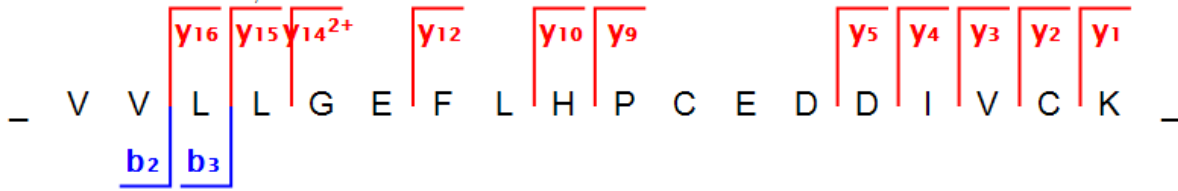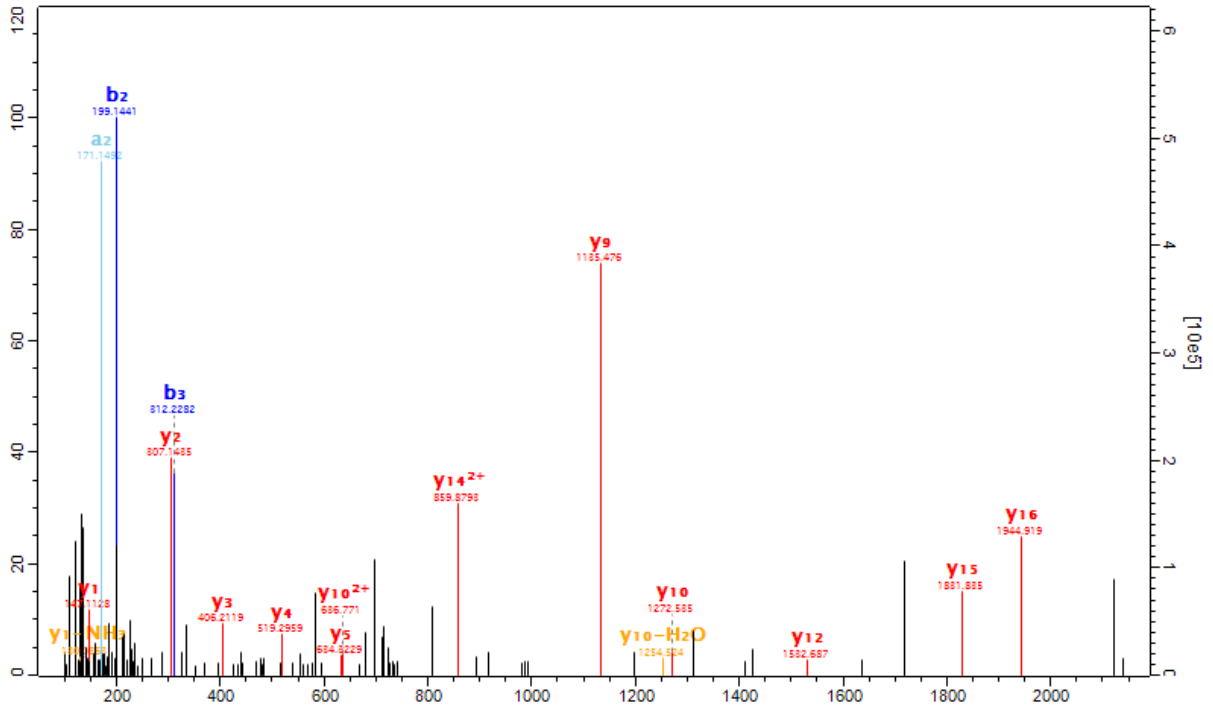

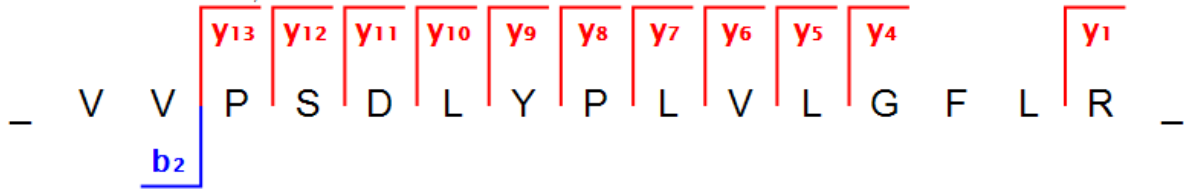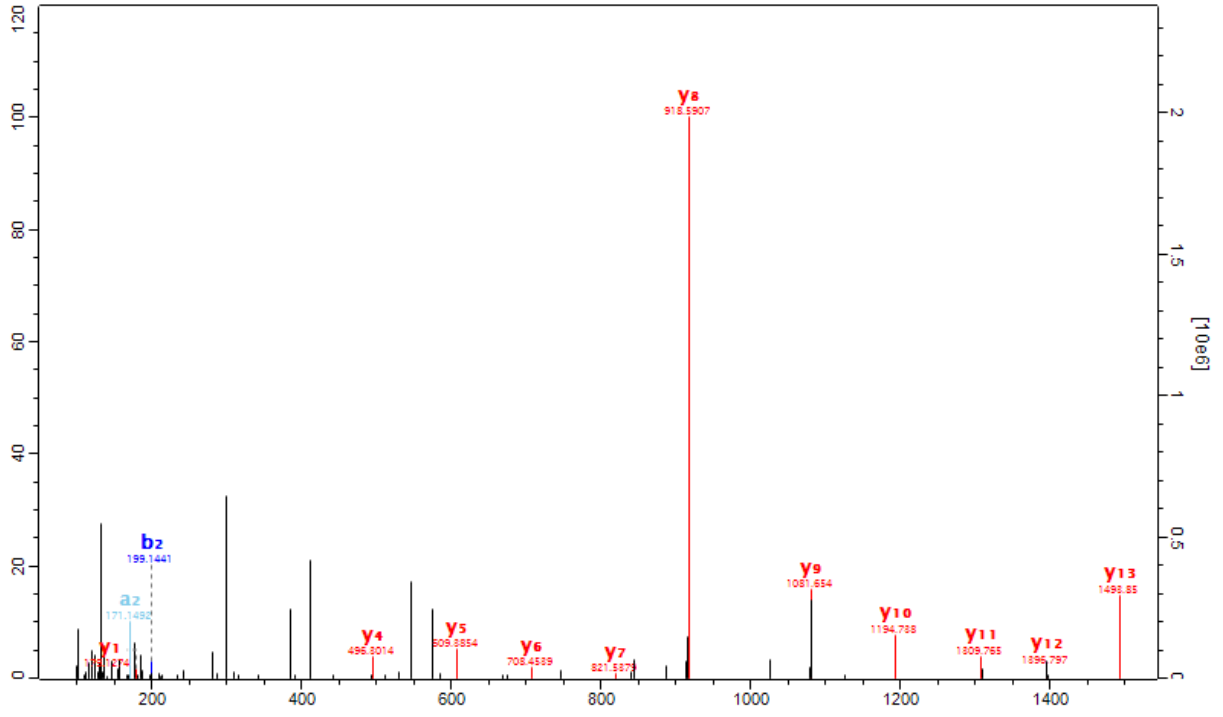

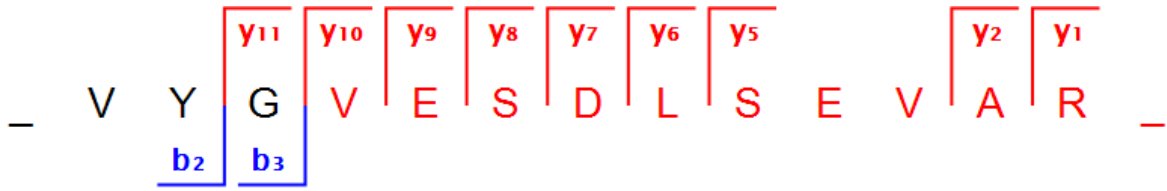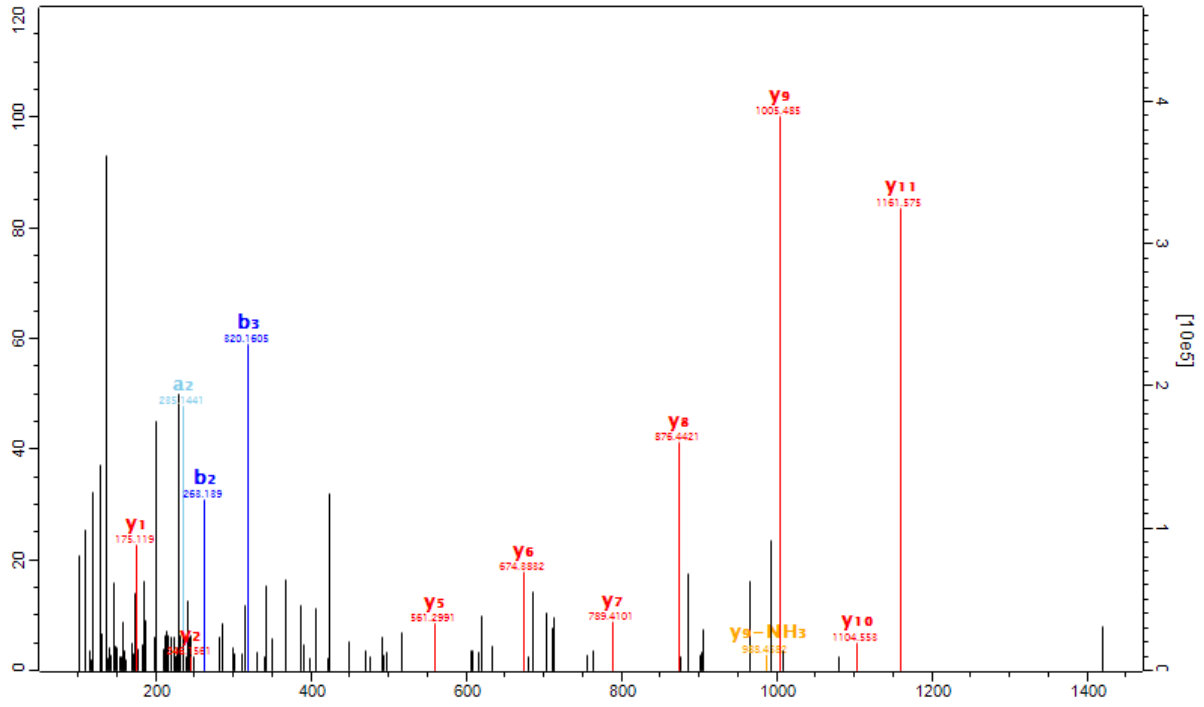

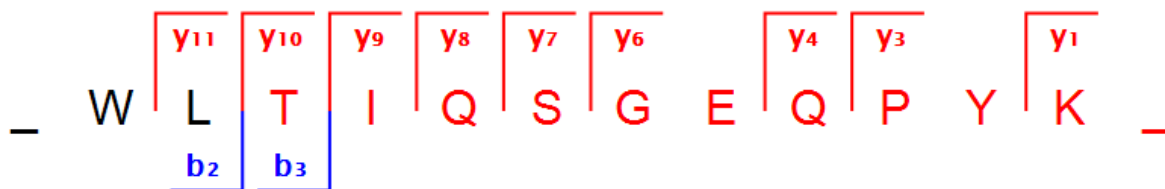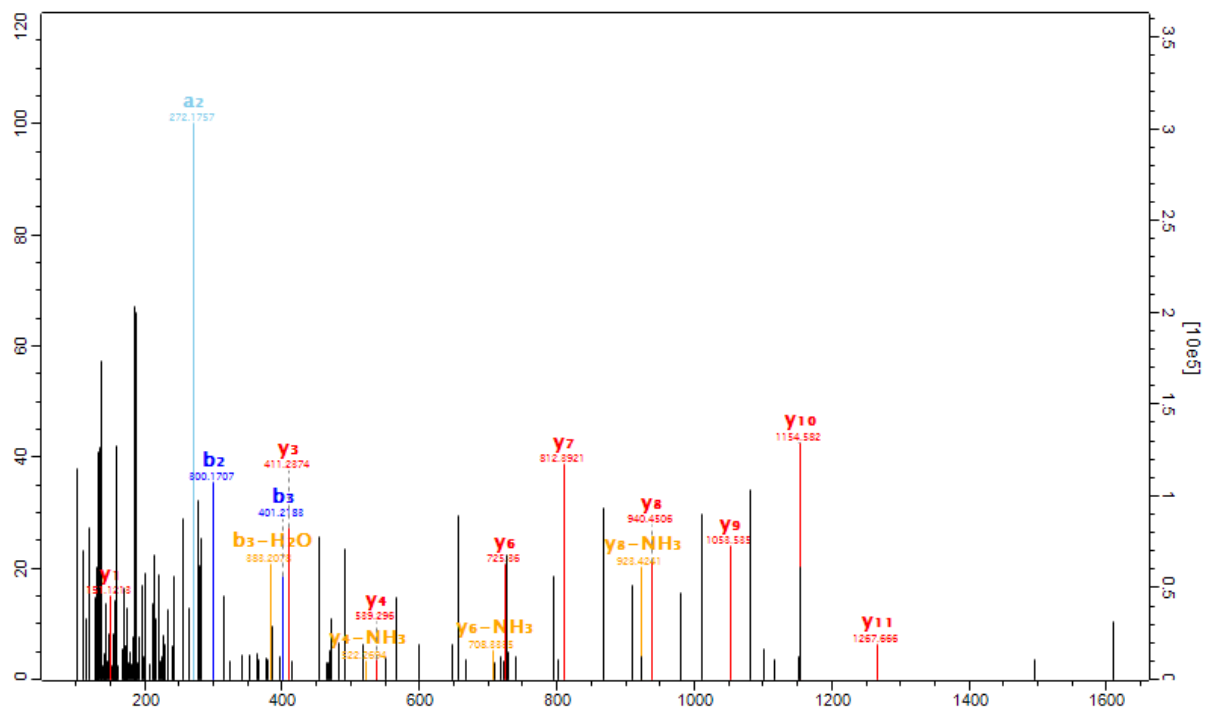



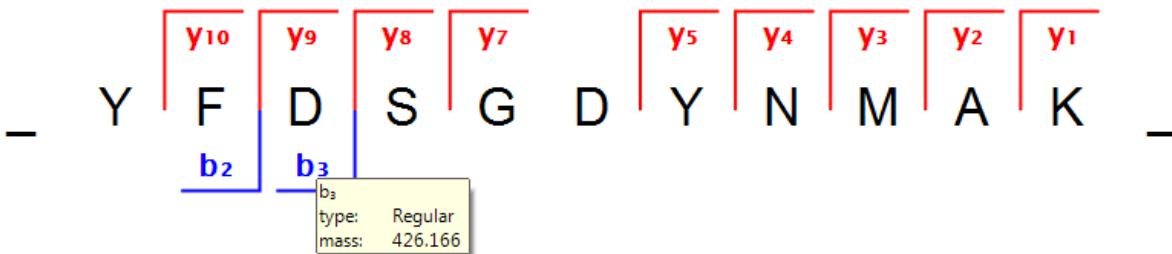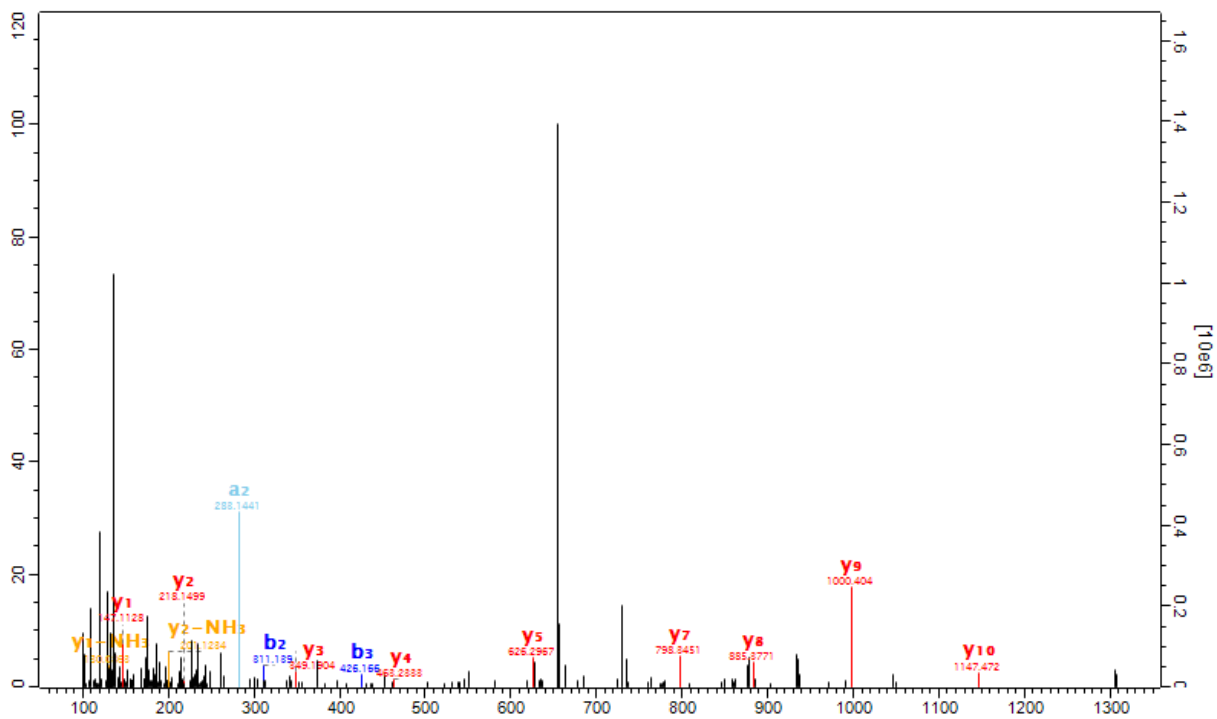

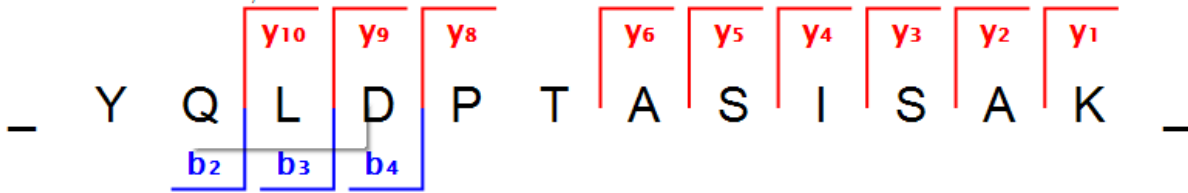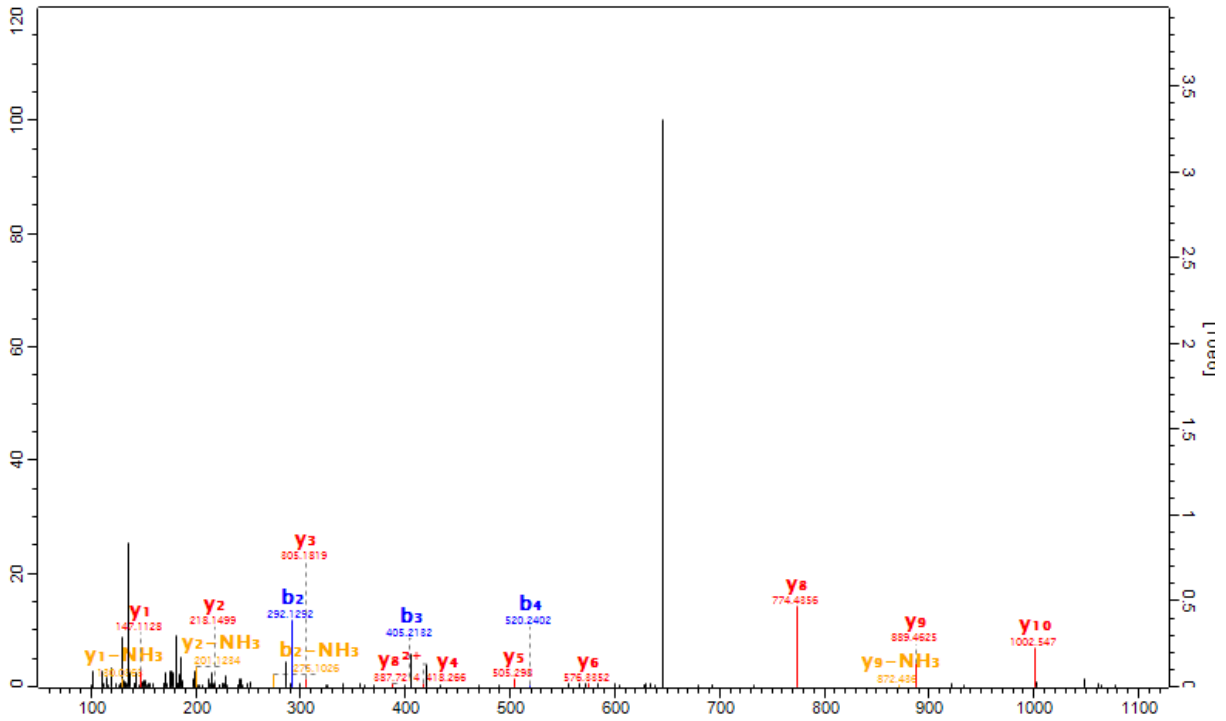

Supplement: 10.1074_M115.054361_mcp.M115.054361-2.pdf [file 10.1074_M115.054361_mcp.M115.054361-2.pdf]
