# Supplementary material
Source: PubMed Central journal article supplement (PMC4762516)

# IDVTDMDAVIALSKALKLDSHLDLEHESIGDMASQIAVISEVR

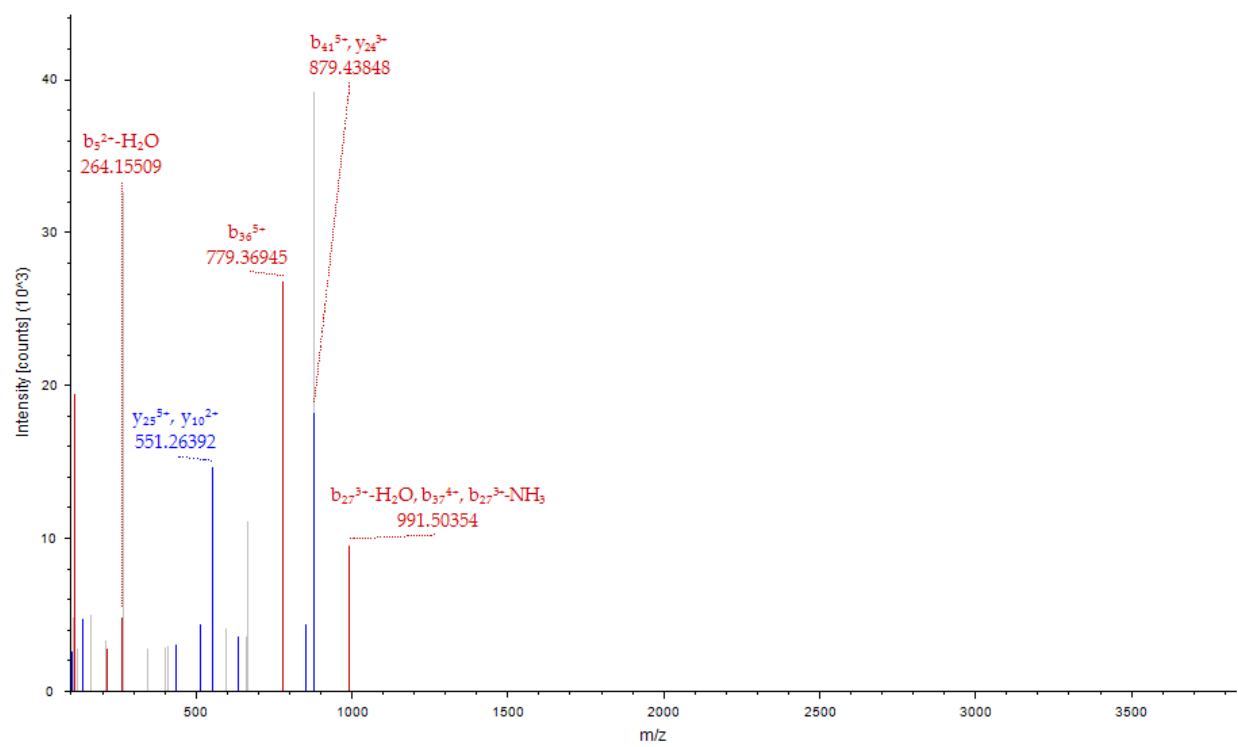

**NLAFSLLGLMMSMVLLSFASVPIYNLFCK**

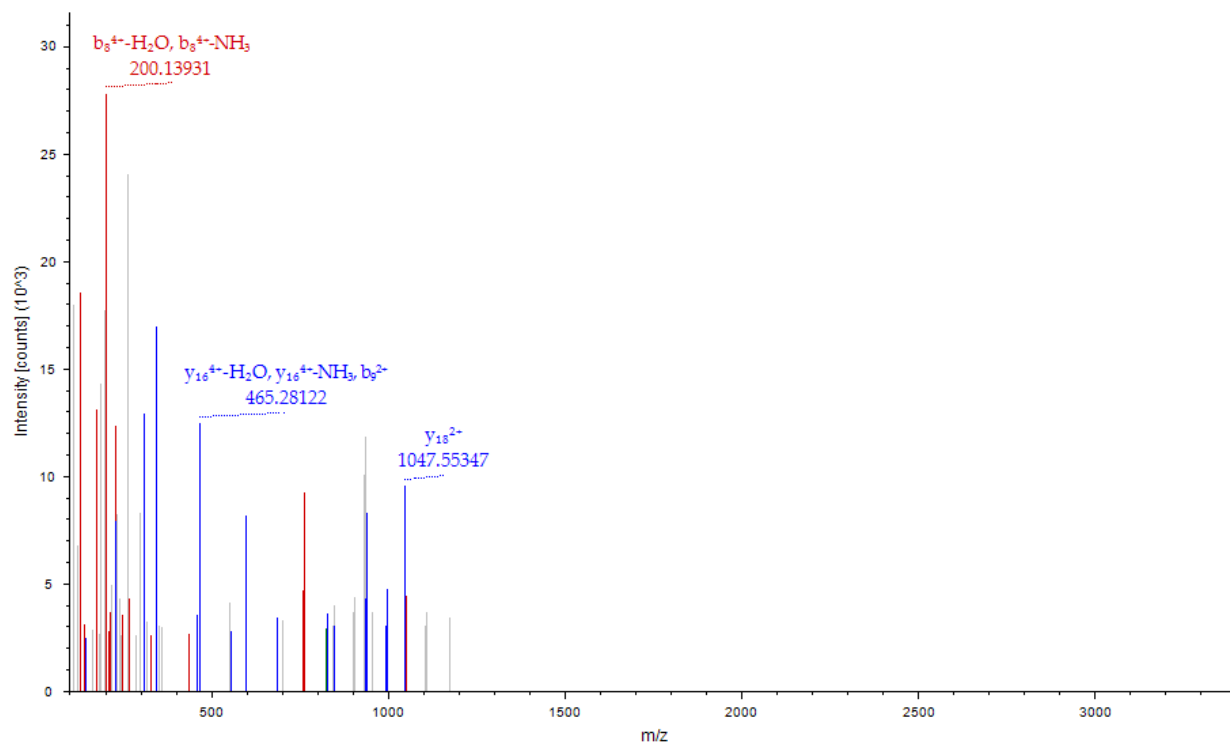

VTQAVITVPAYFNDAGR

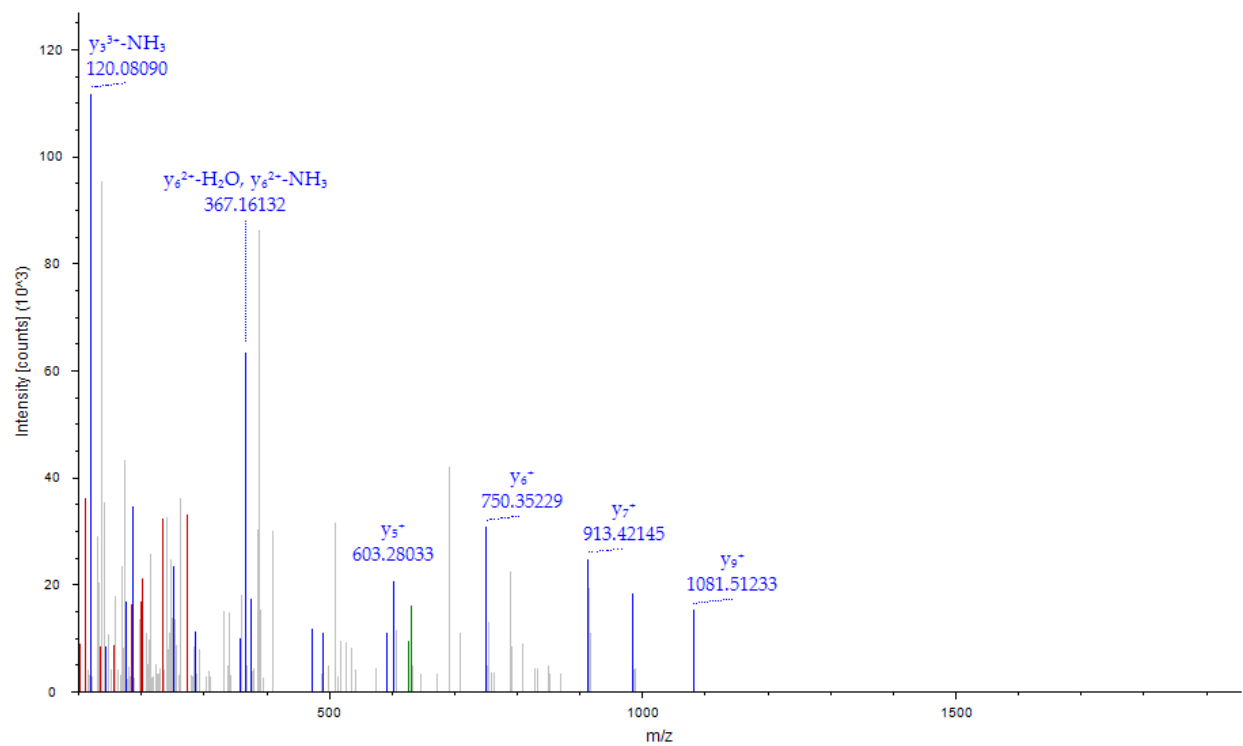

# LLDVDNR

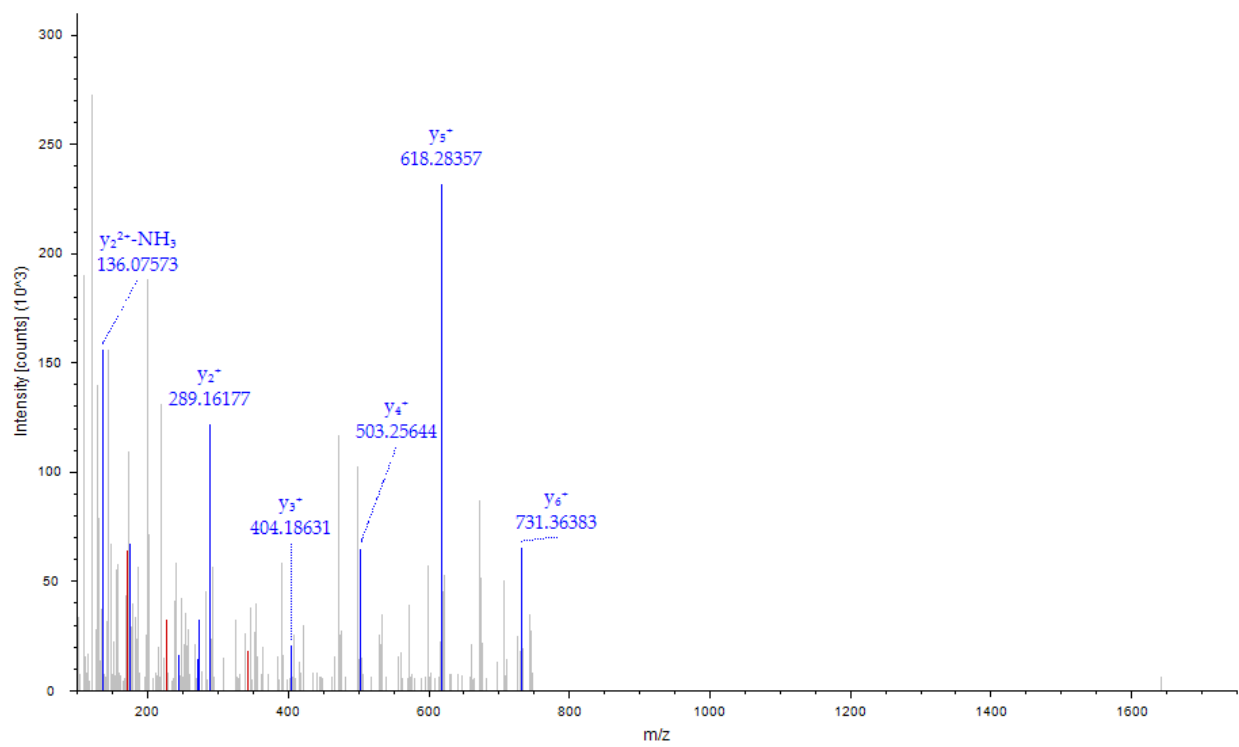

# YLDILGIK

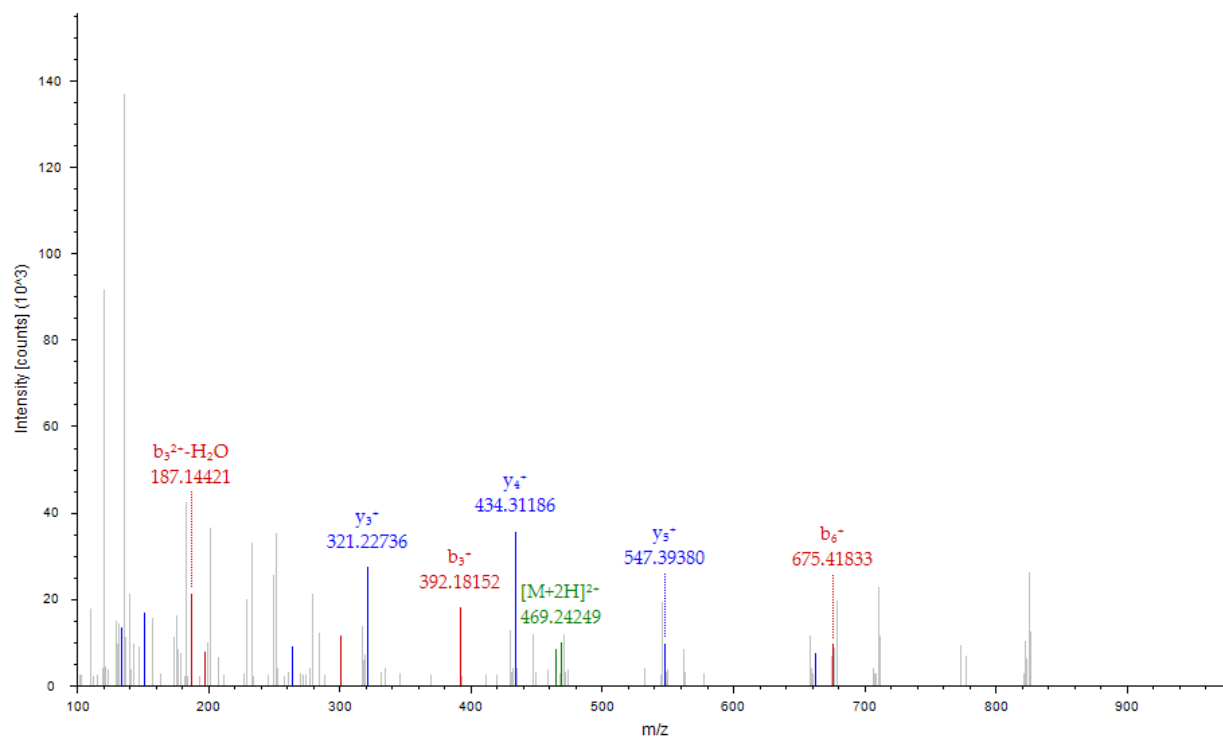

# EQVSLGIK

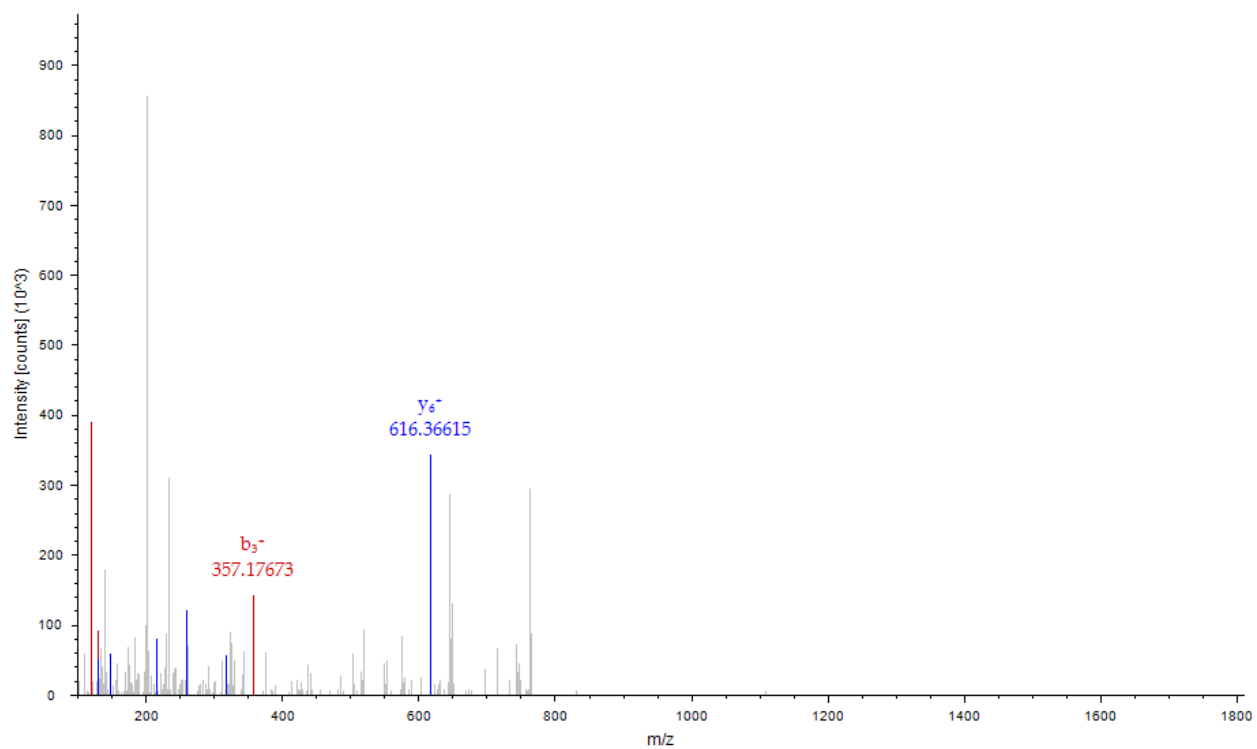

# LSSLDNIK

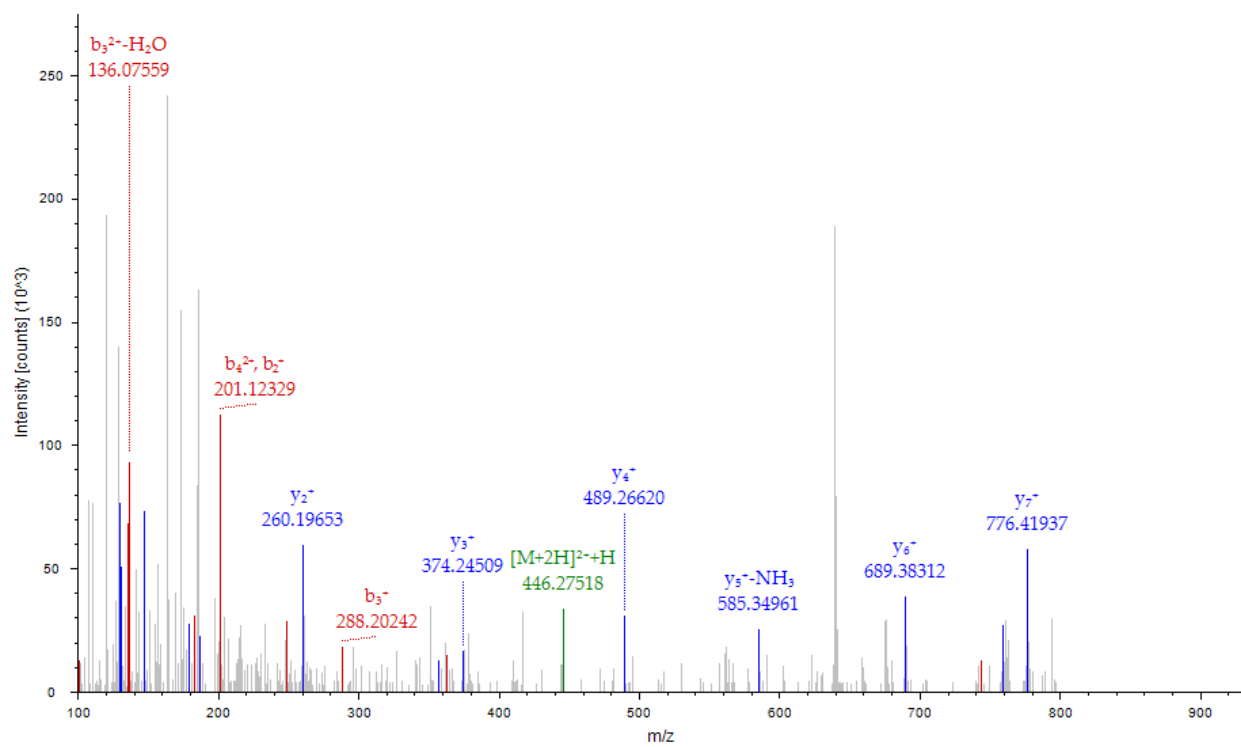

# RYPDIR

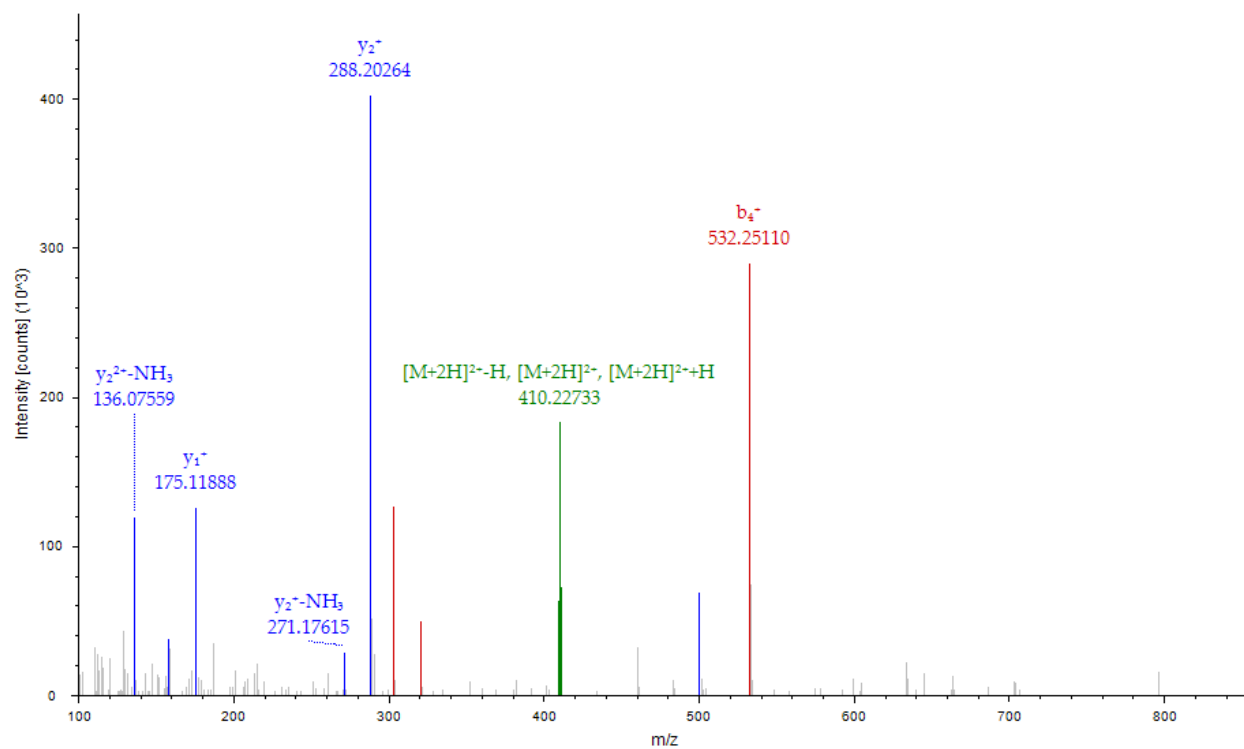



TPTEYAAFISYLSYTGVTILFVVLGSNIVRR

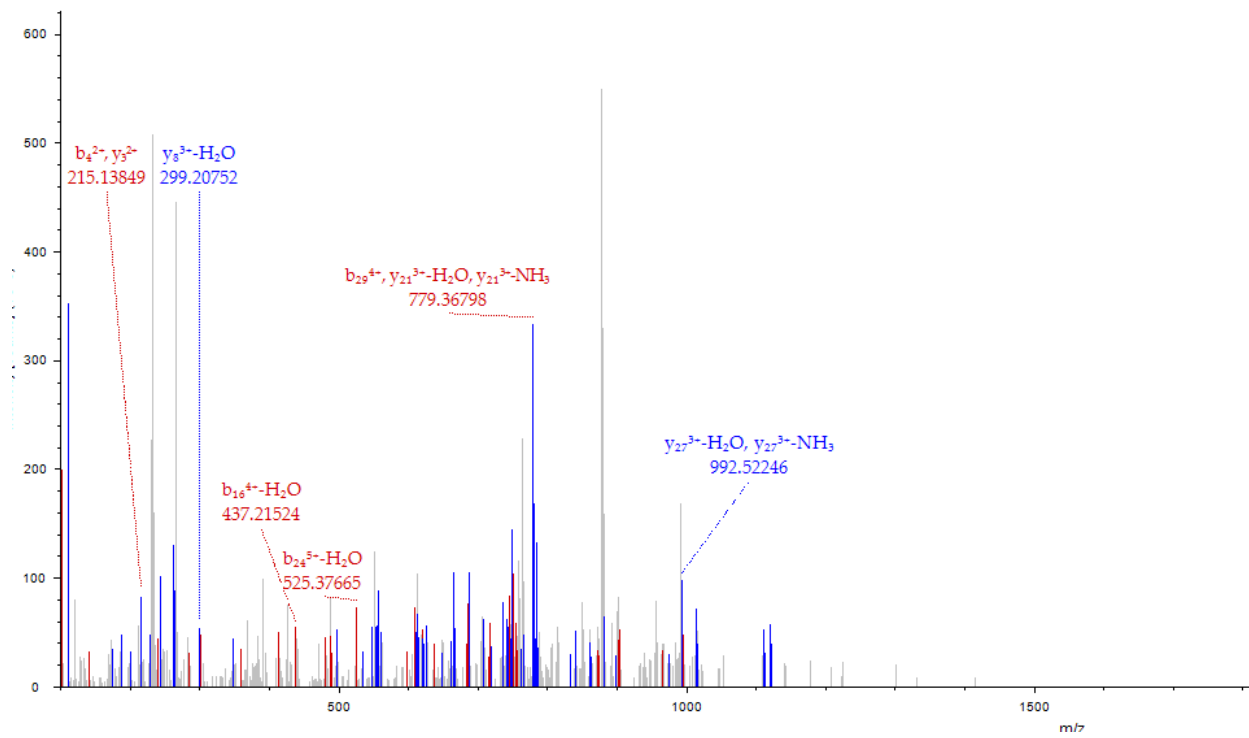

# VSATPFVR

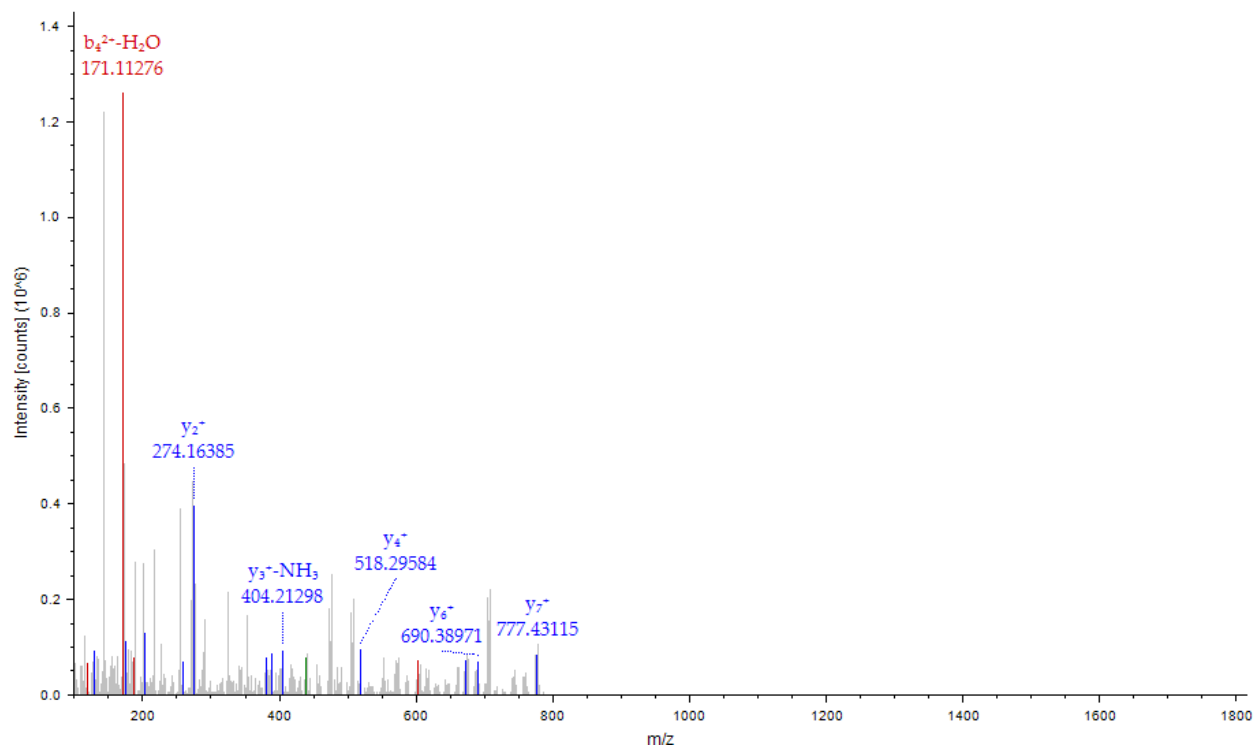

# LKEELER

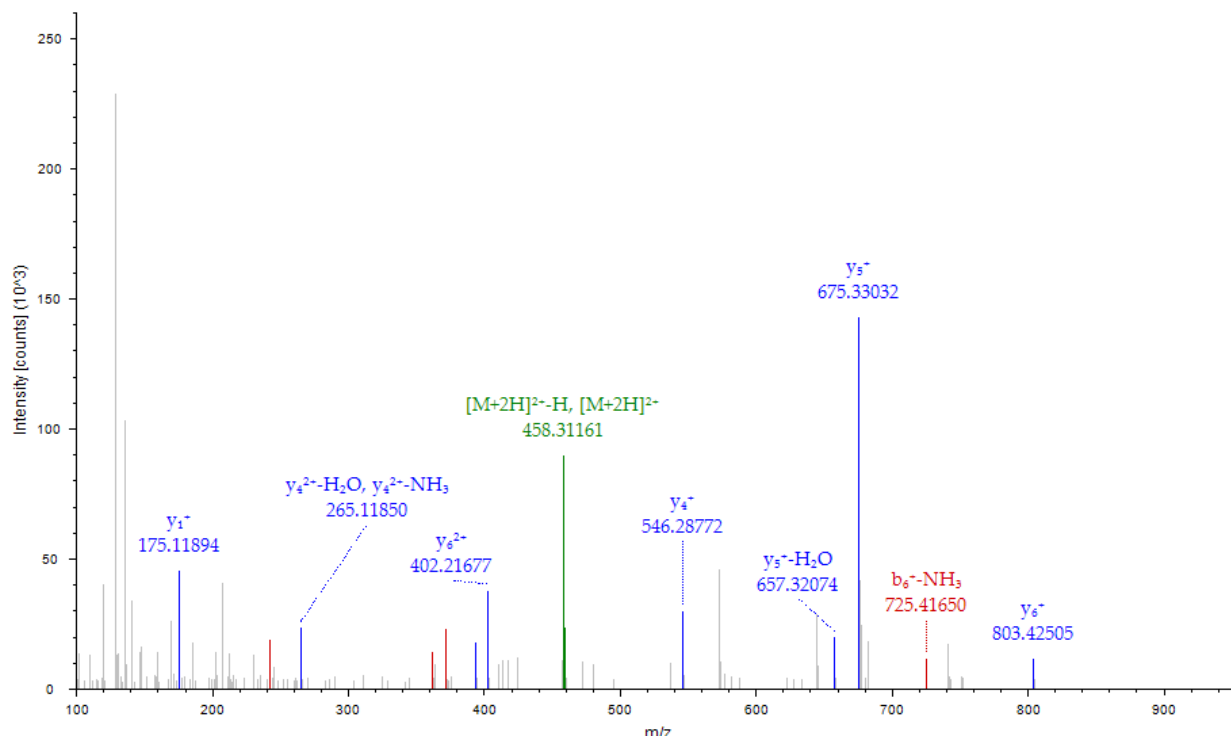

# GVVDEDLPLNISR

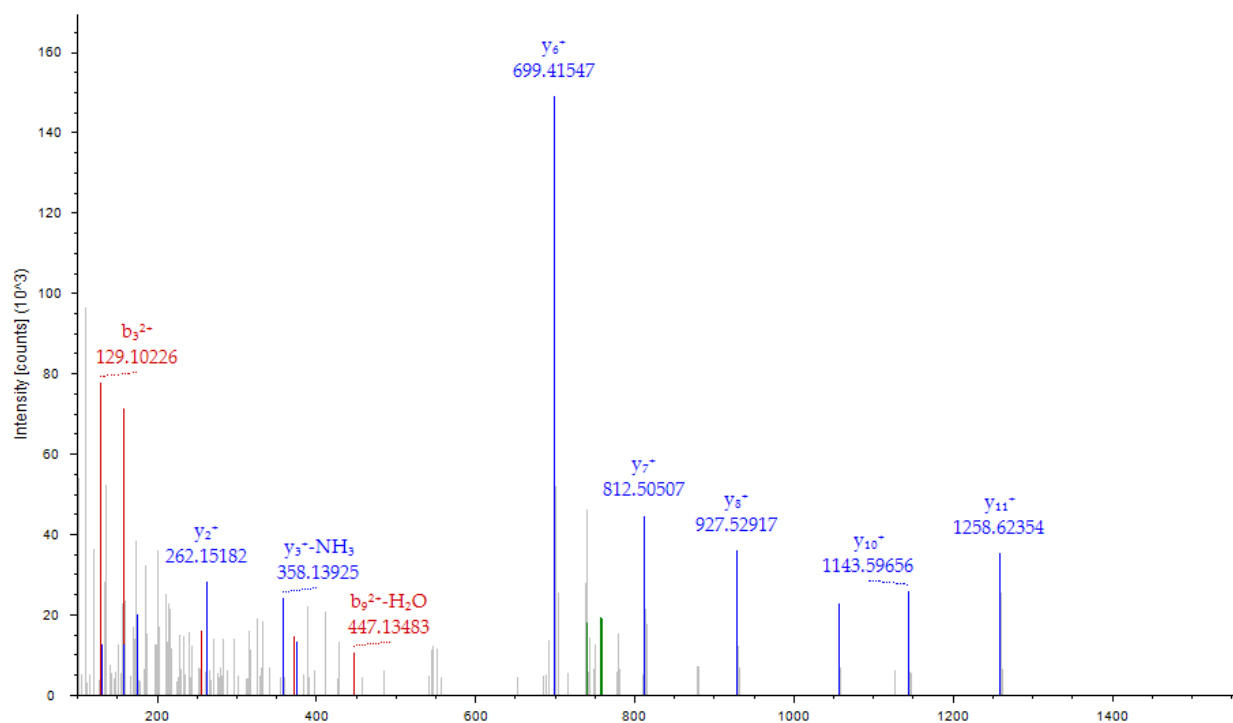

# LIEANYK

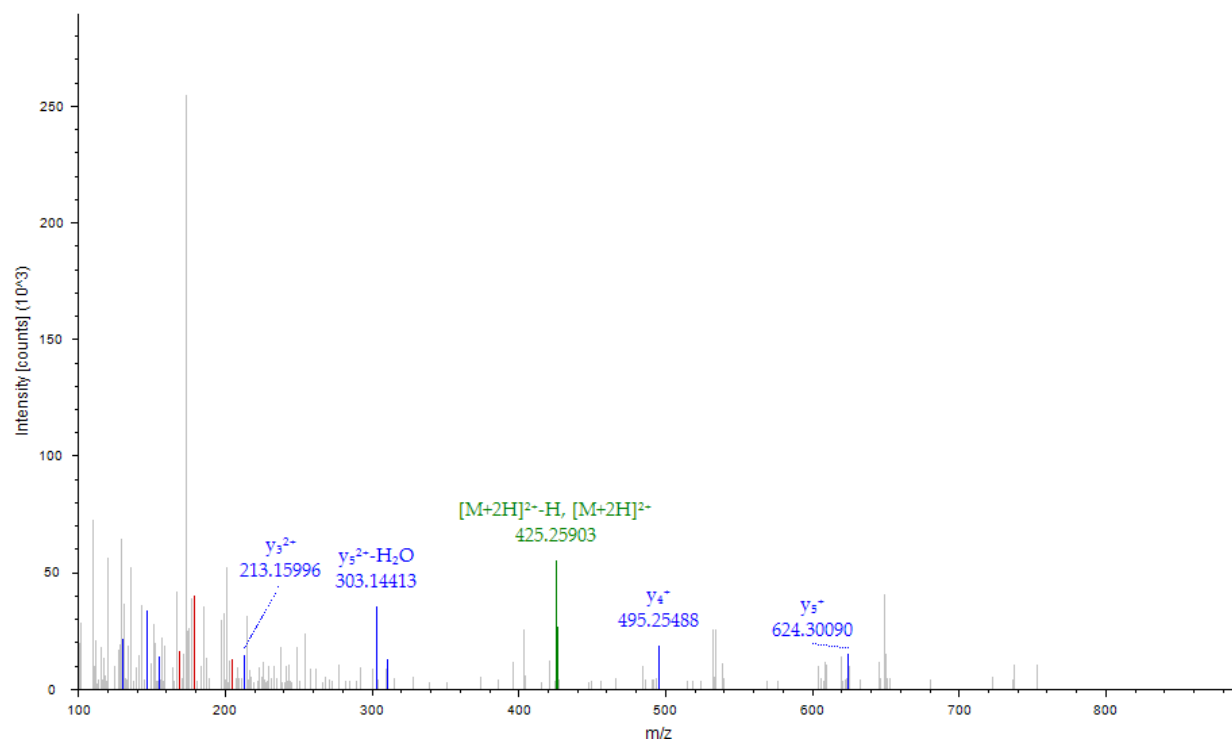

# TIRFMQAIIDEIENEFPK

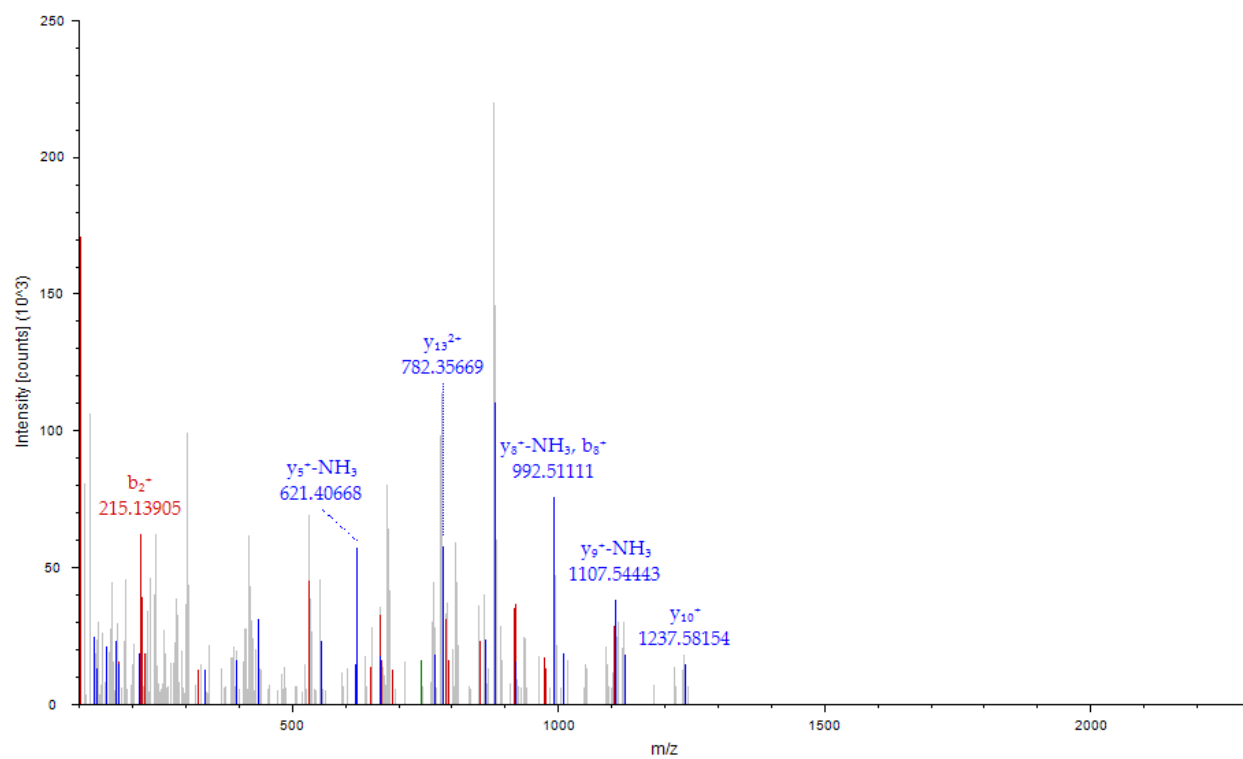

# SILNNTLQSYEK

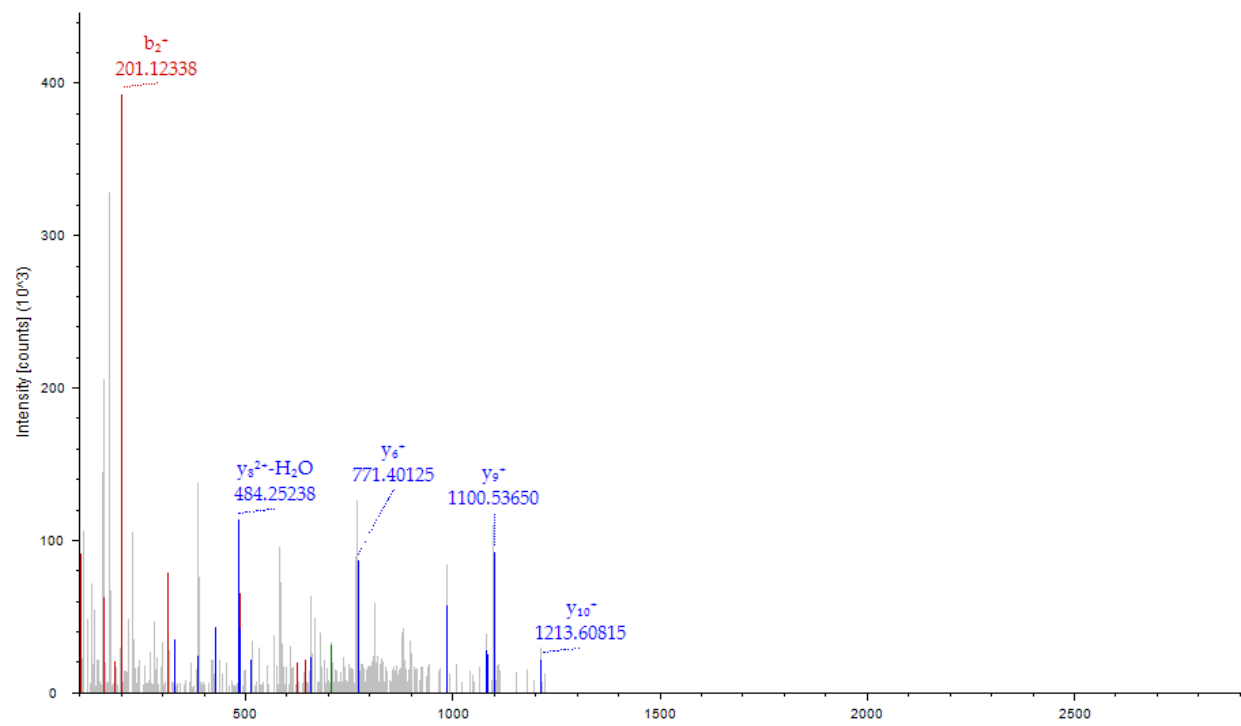

# VQVFAGPR

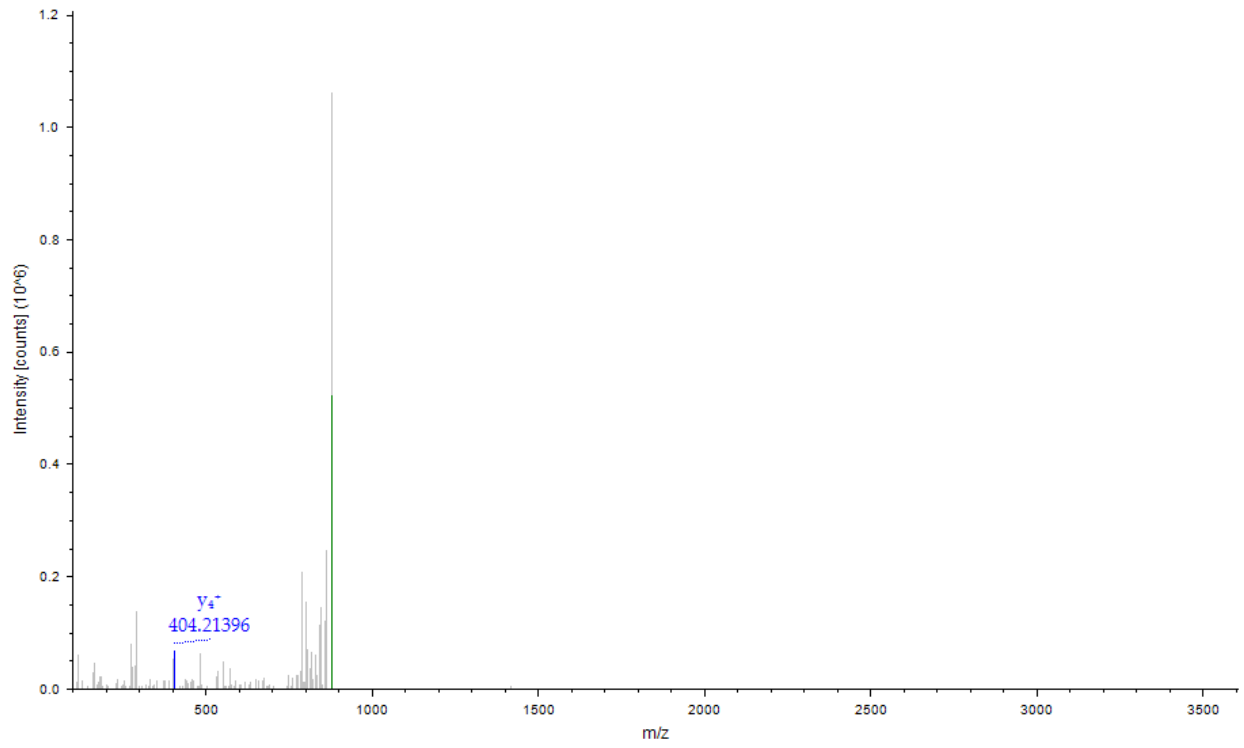



# IILYDILDMLSNITDQTEENIQKAMYDIGMK

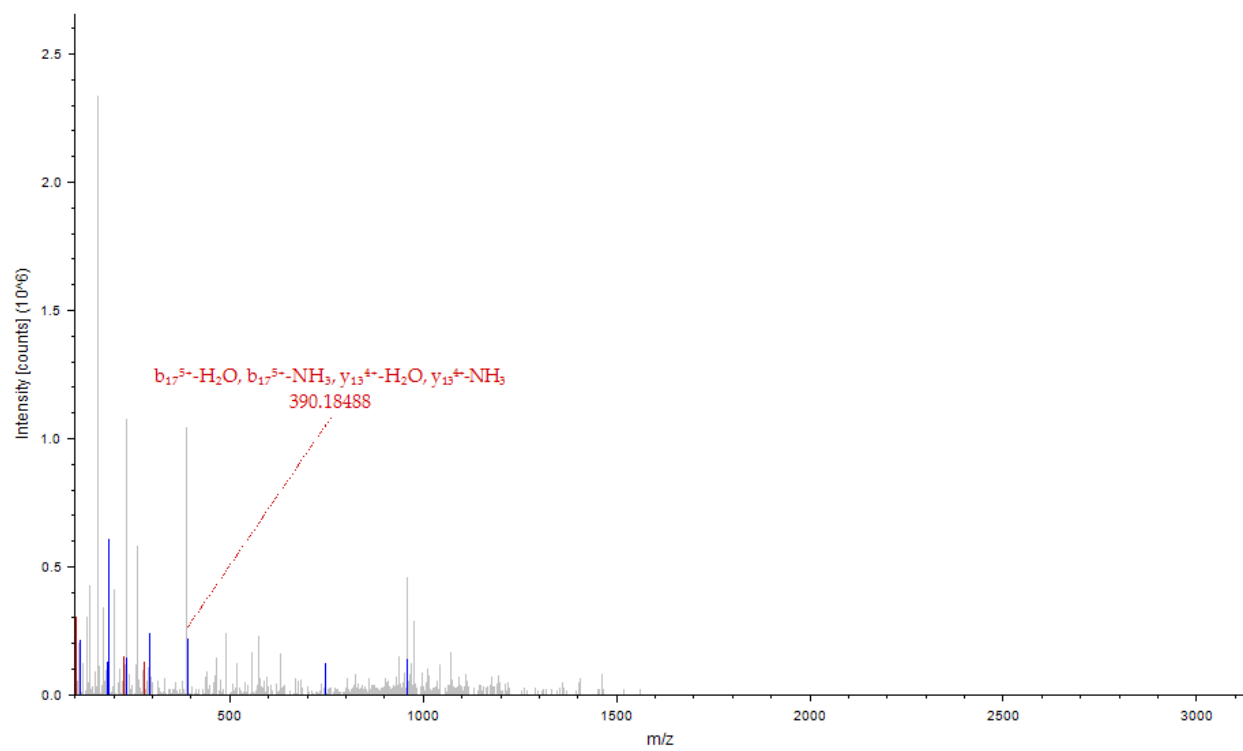

**NINFNSNVSFTITNNISNTK**

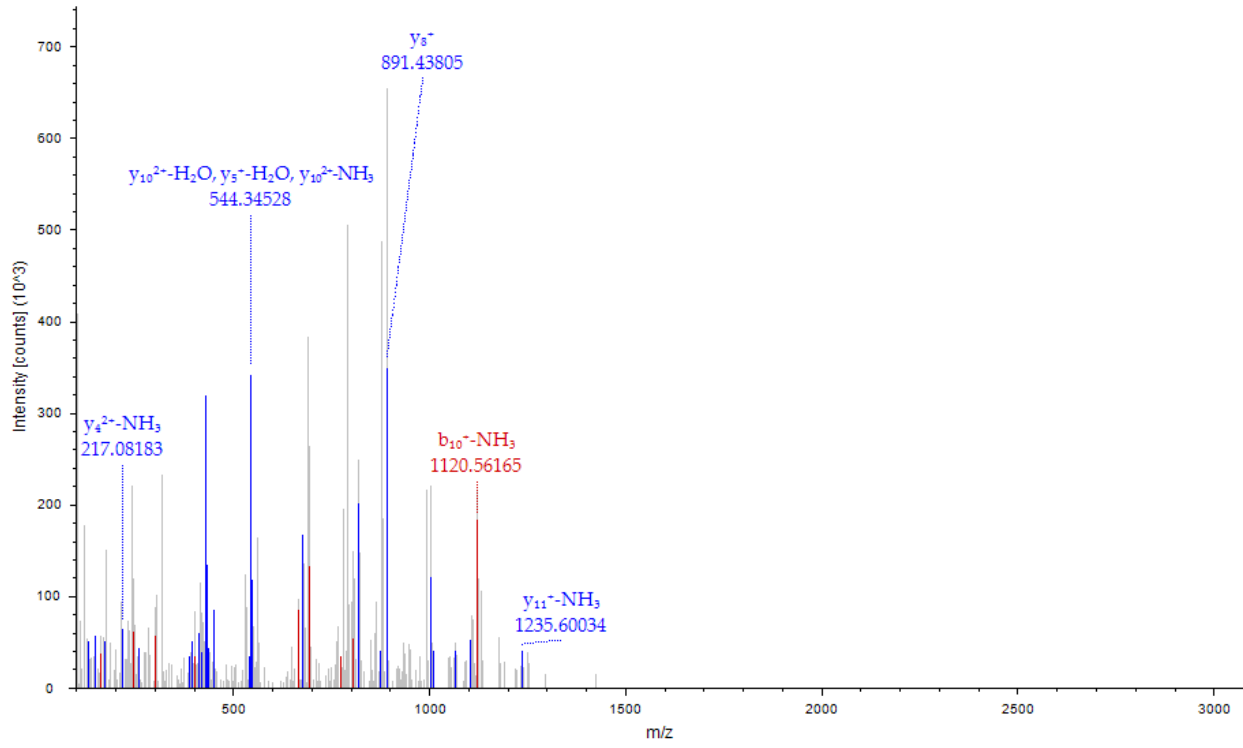

# FLQLQGSSPIDPIYVHLWSCYGGTANK

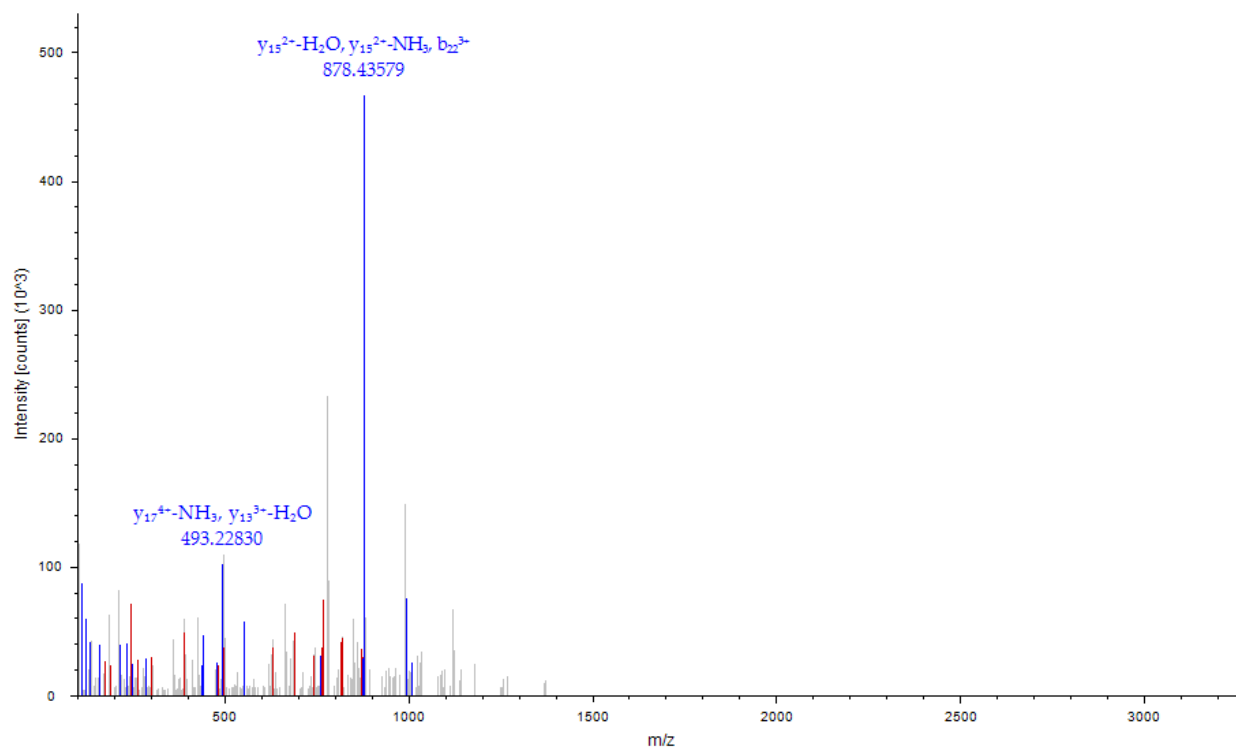

# QLQTLLK

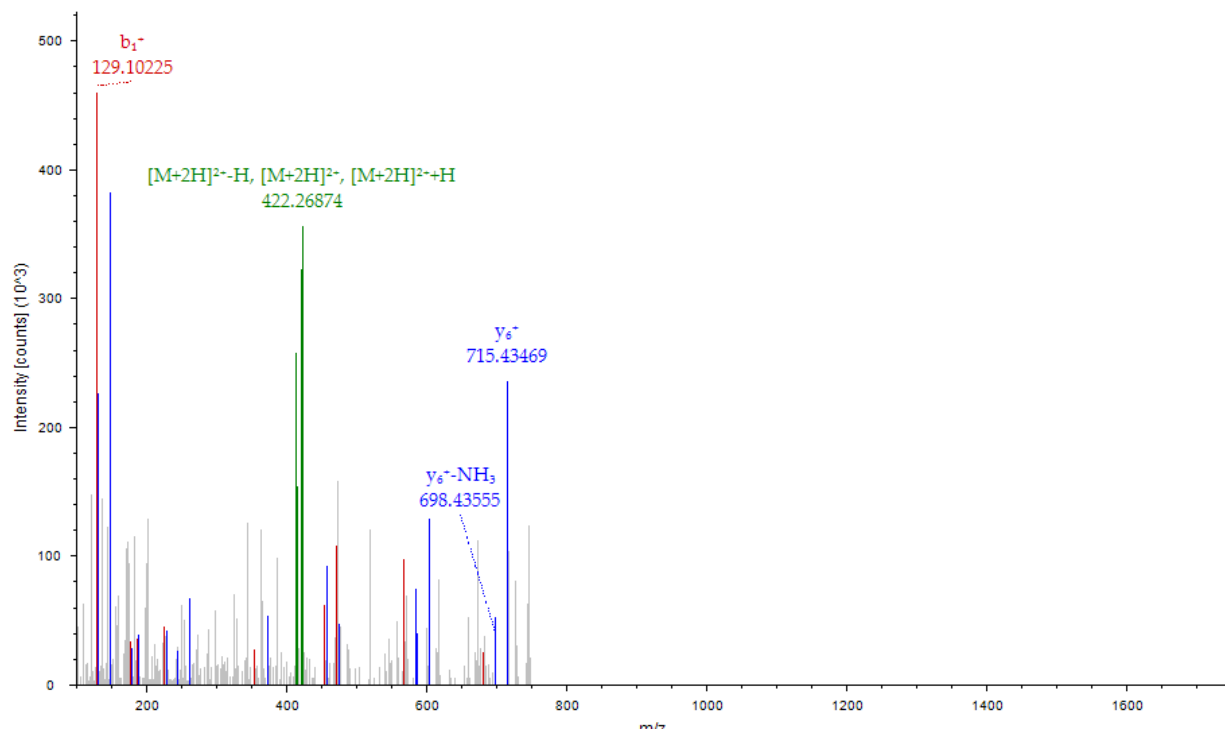

# IQADIYK

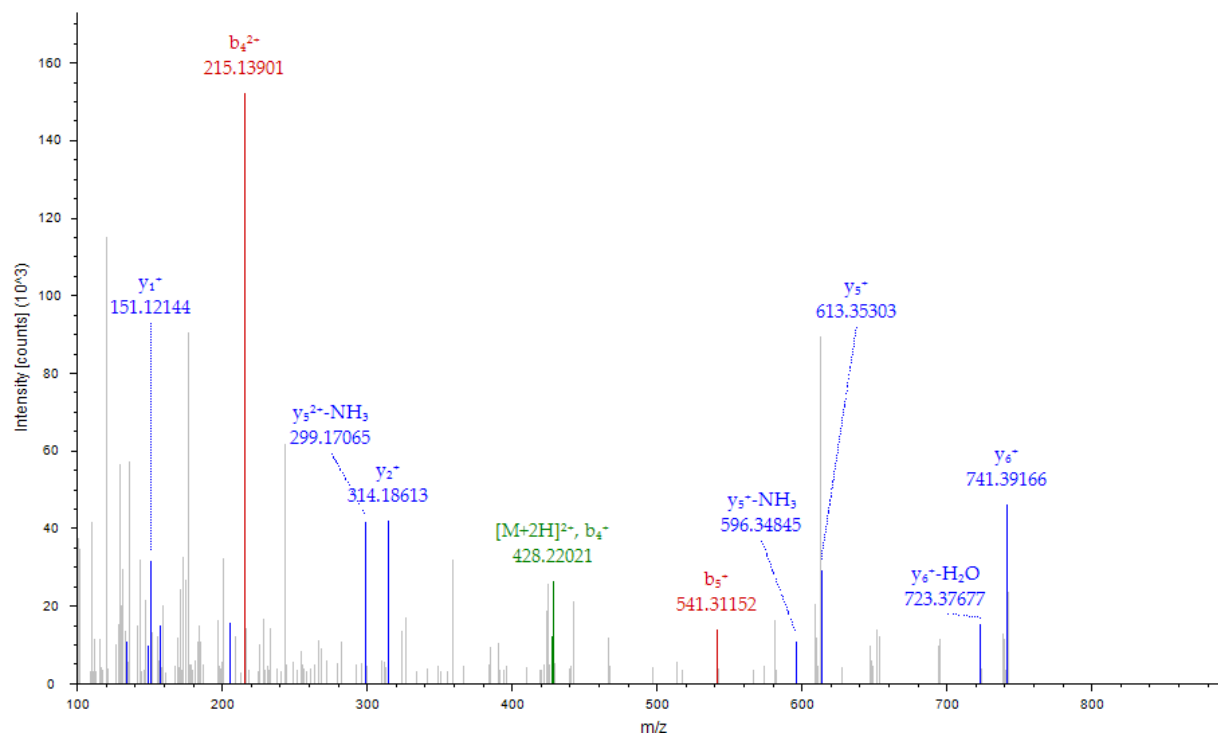

# MPQSHIPVMLNEMLANLAPK

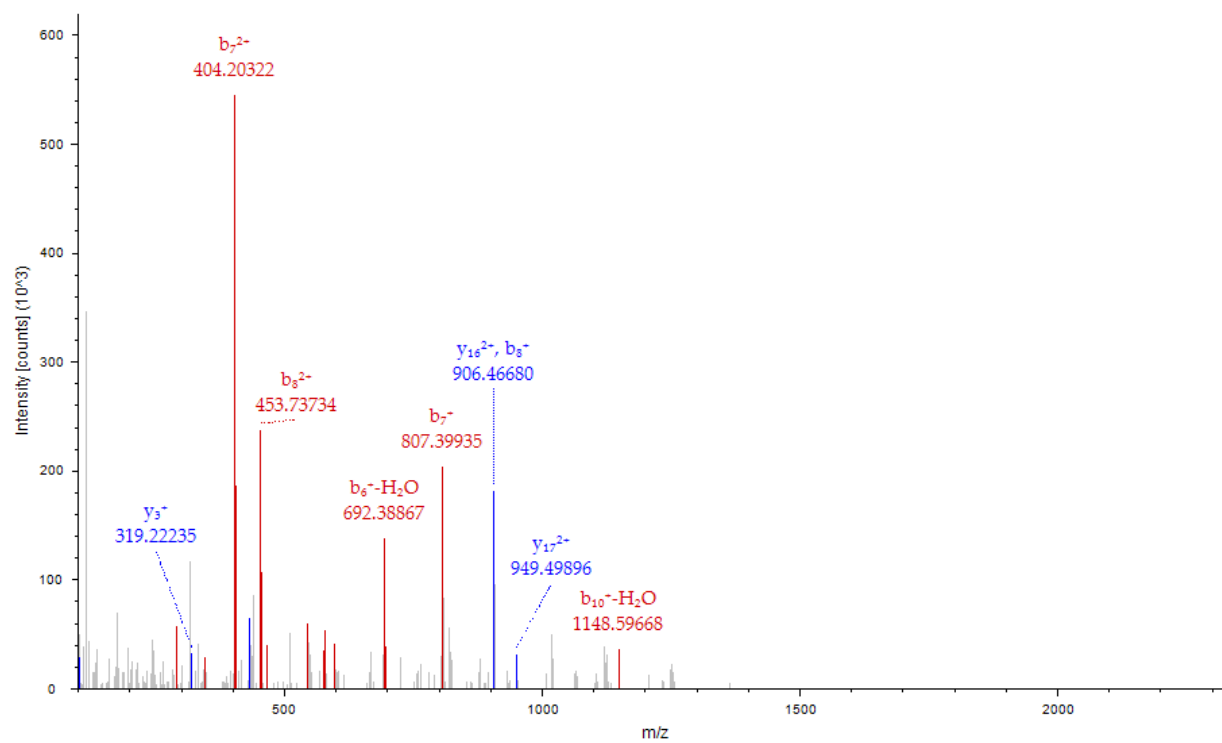

TAVEKVGFIYTLNPGDGAFYGPKEFLVLTDAIGR

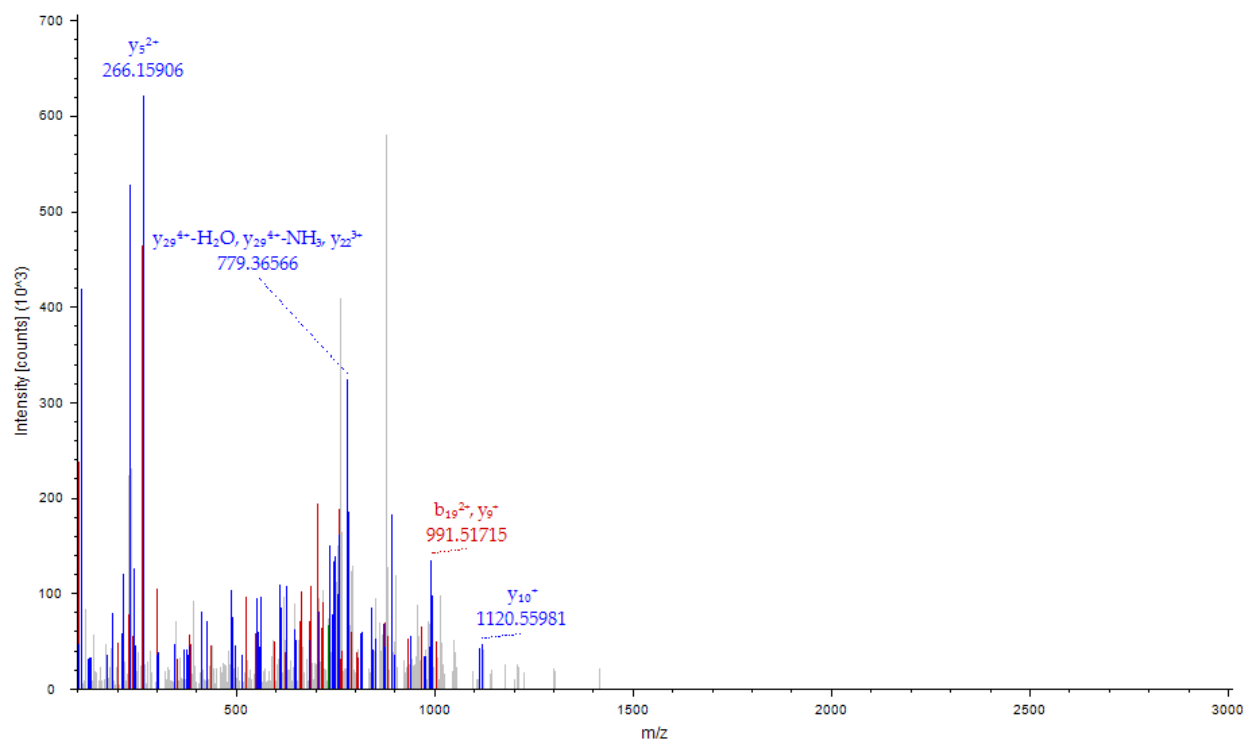

# ILSDFNFK

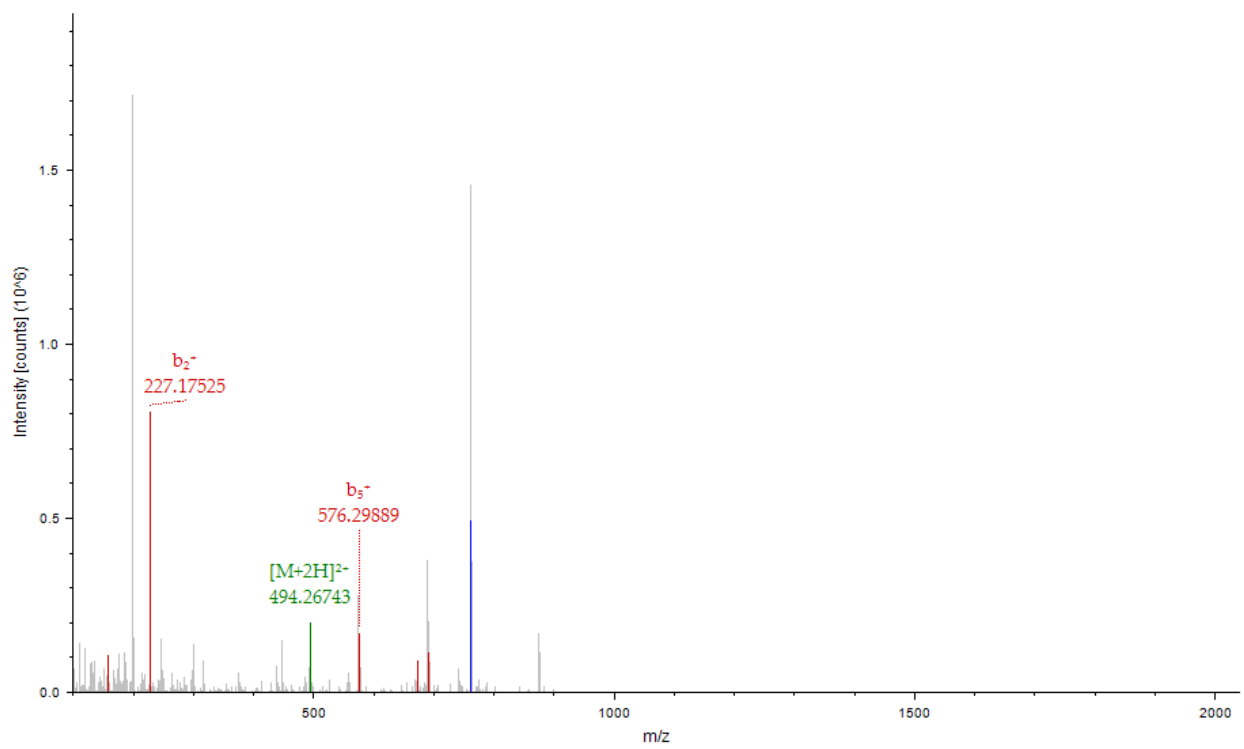



**LGIPHYVLDYENKFKESVIDNFVDSYLHGETPLPCVQCNK**

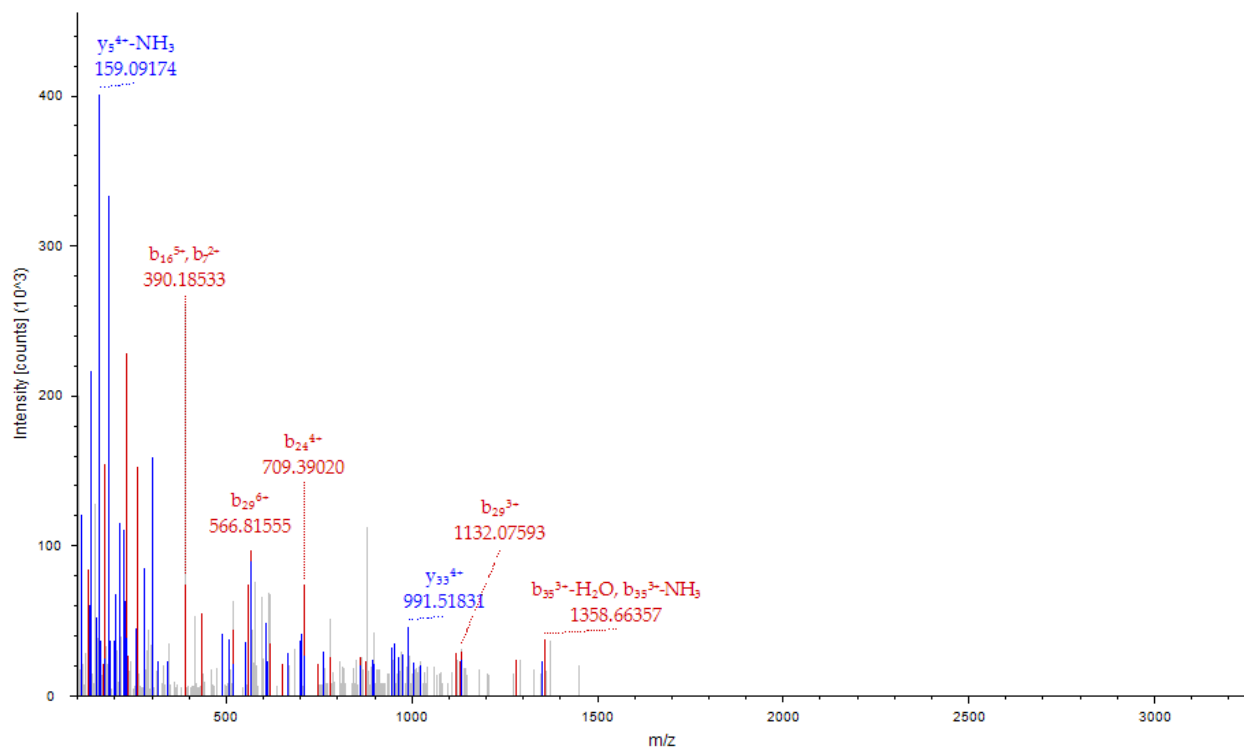

# SIDLNLFQNLK

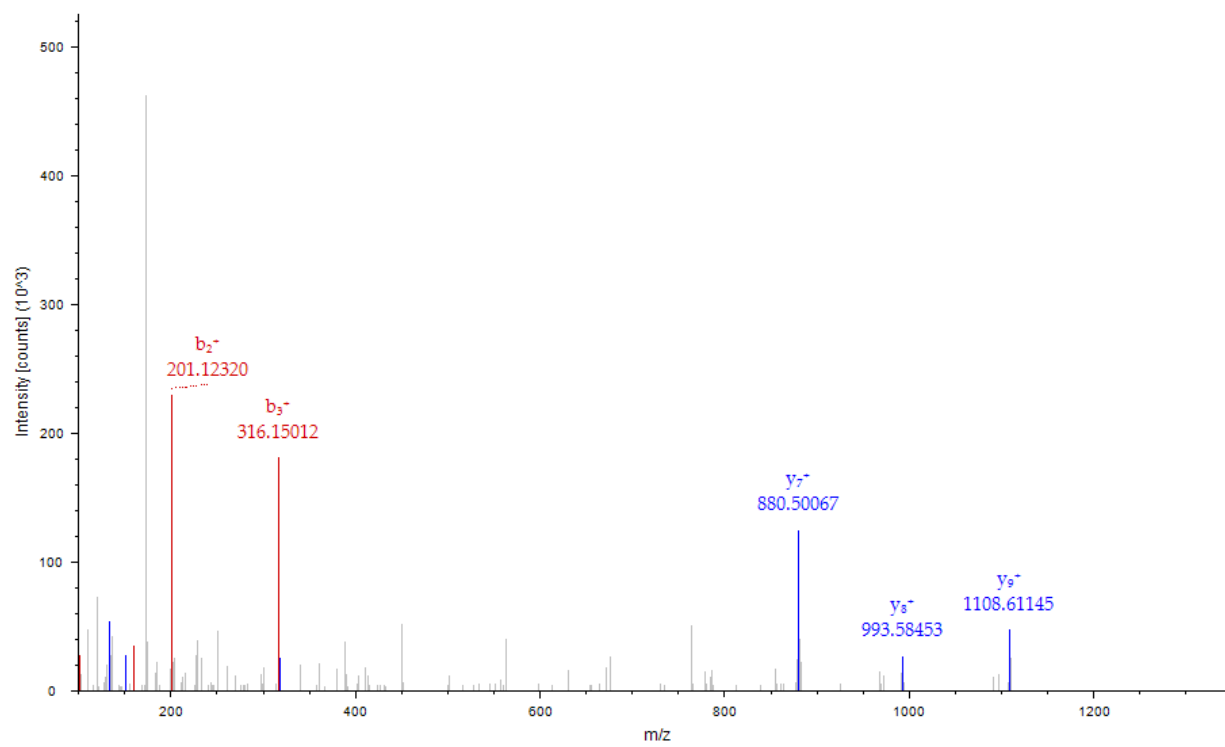

# RANELNWHPK

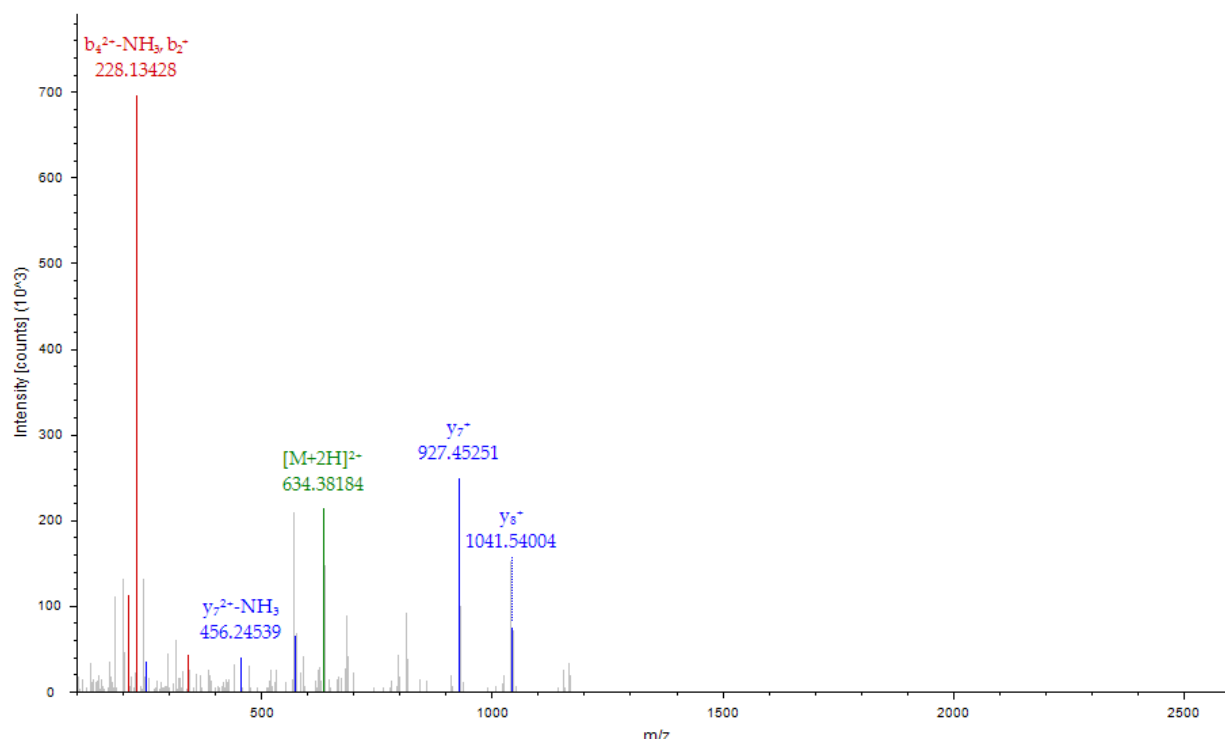

# LSSLDNIK

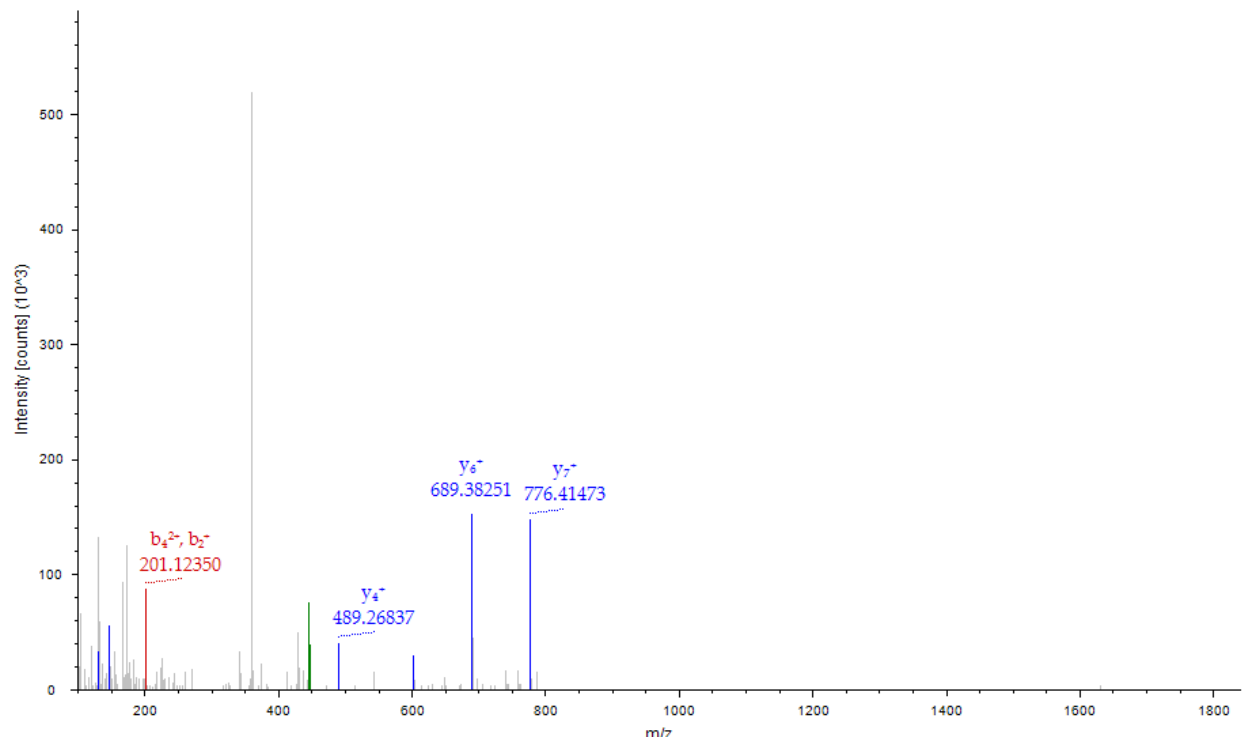

# LVEVLEESDDVQR

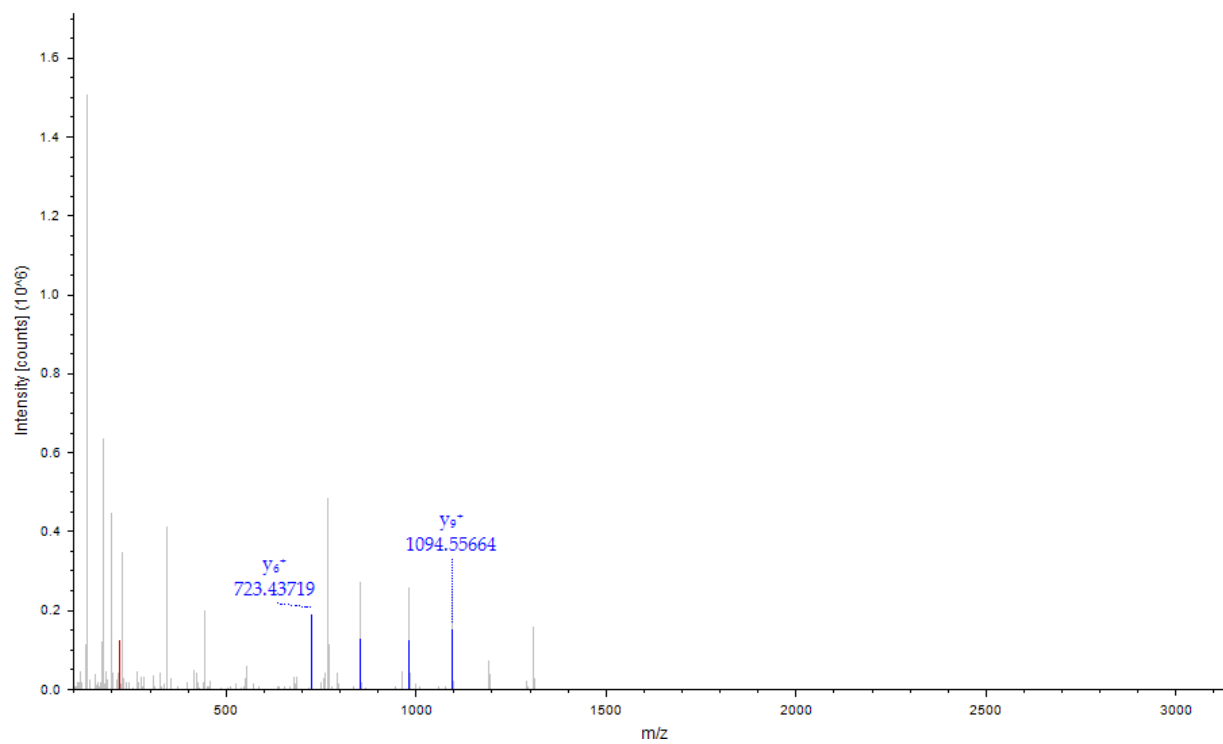

# VSATPFVR

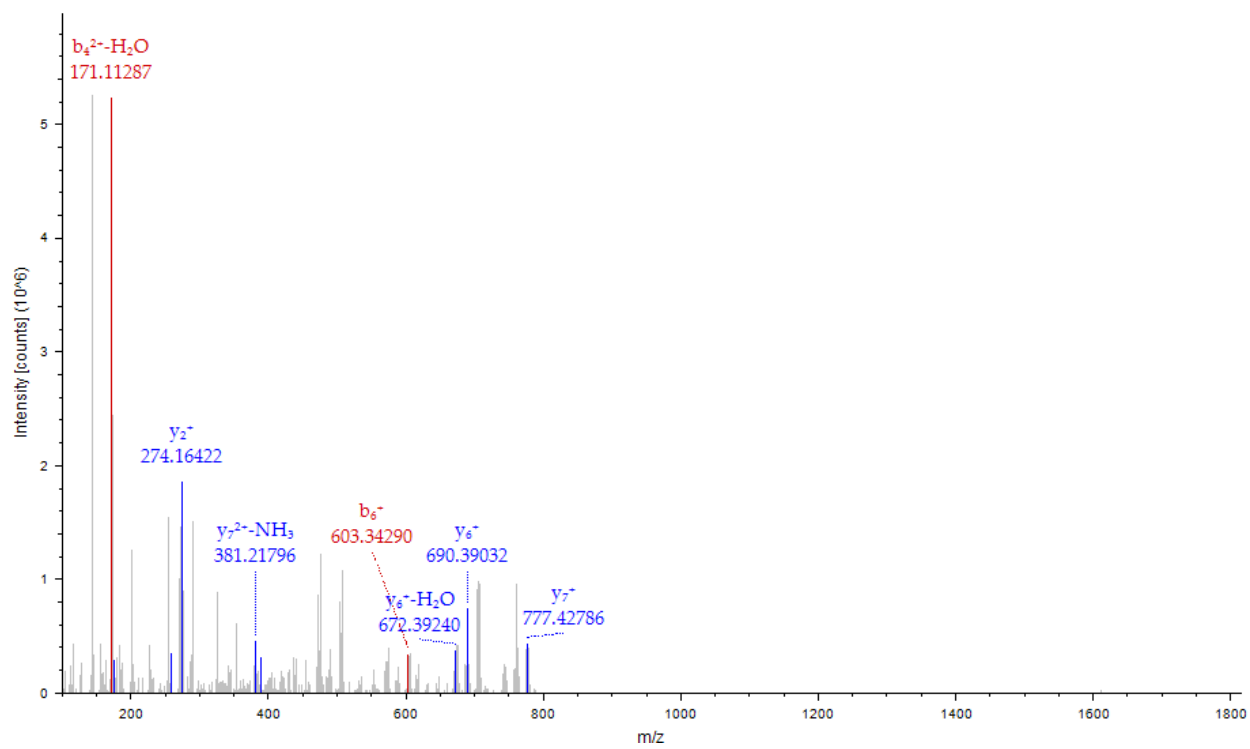

# SGLLNSPYVSHFR

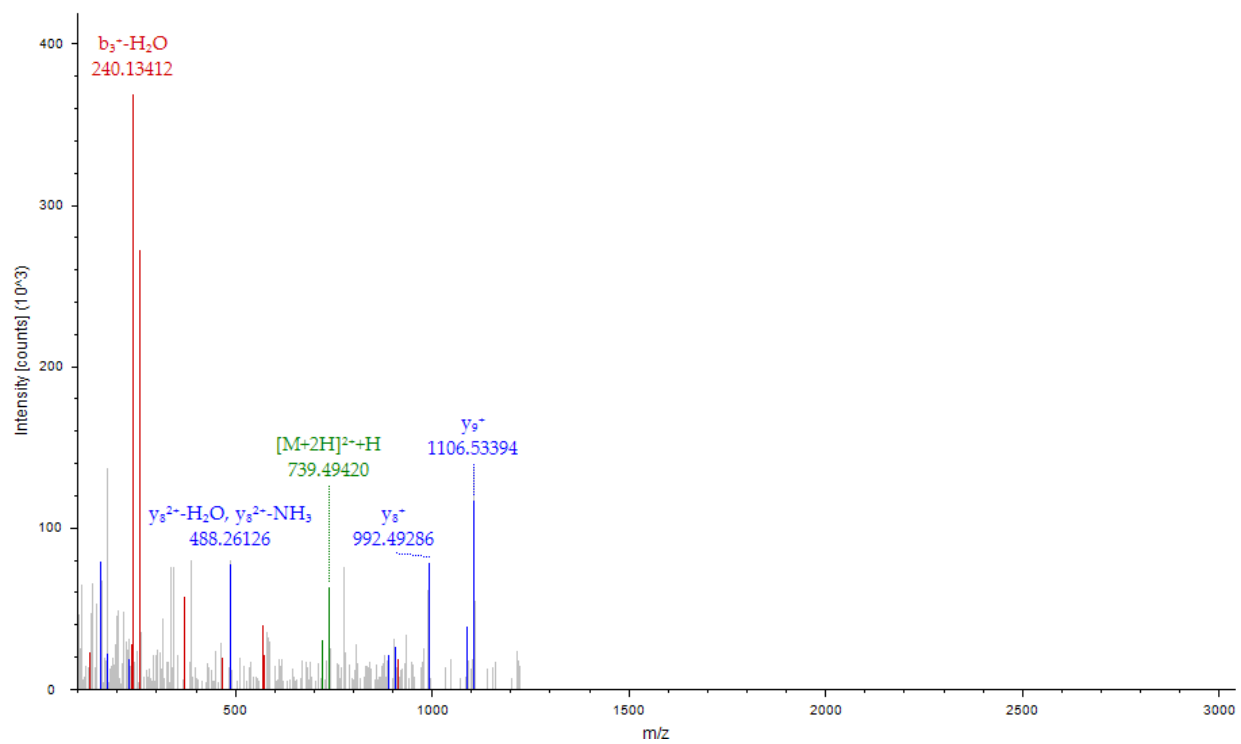

# QFMIEAINNYYNK

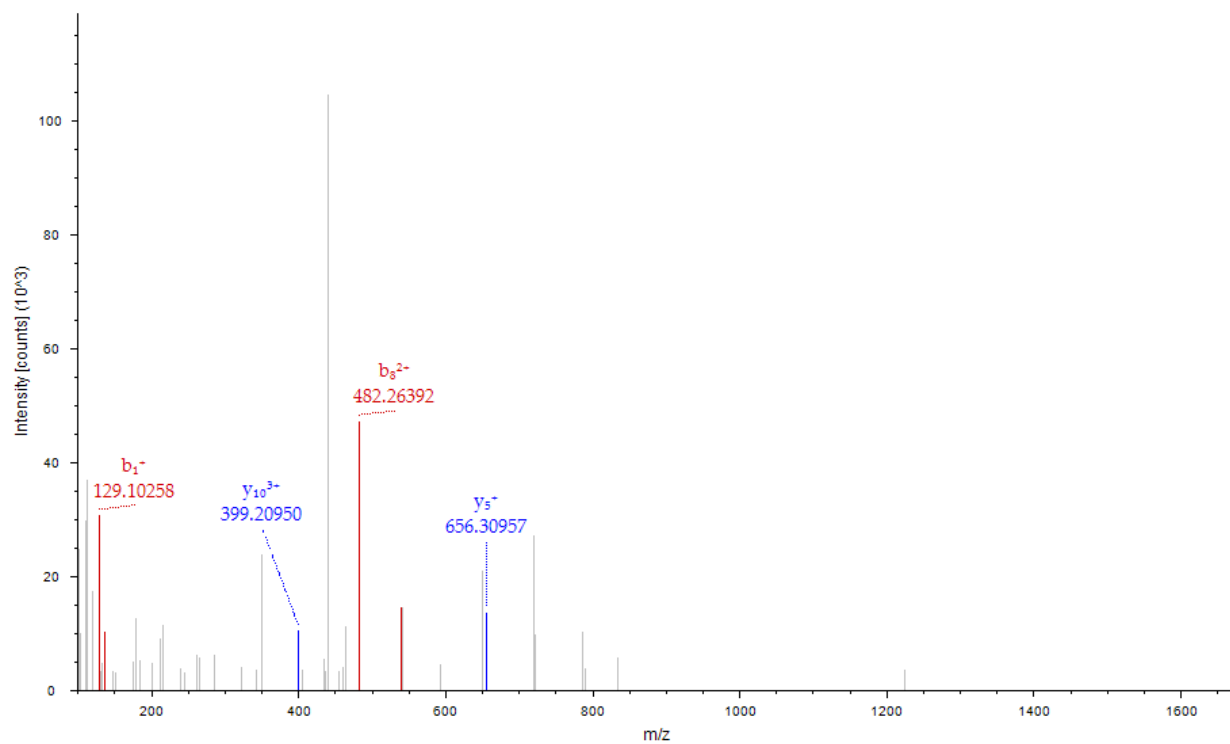



# DILQESQIVLENSAK

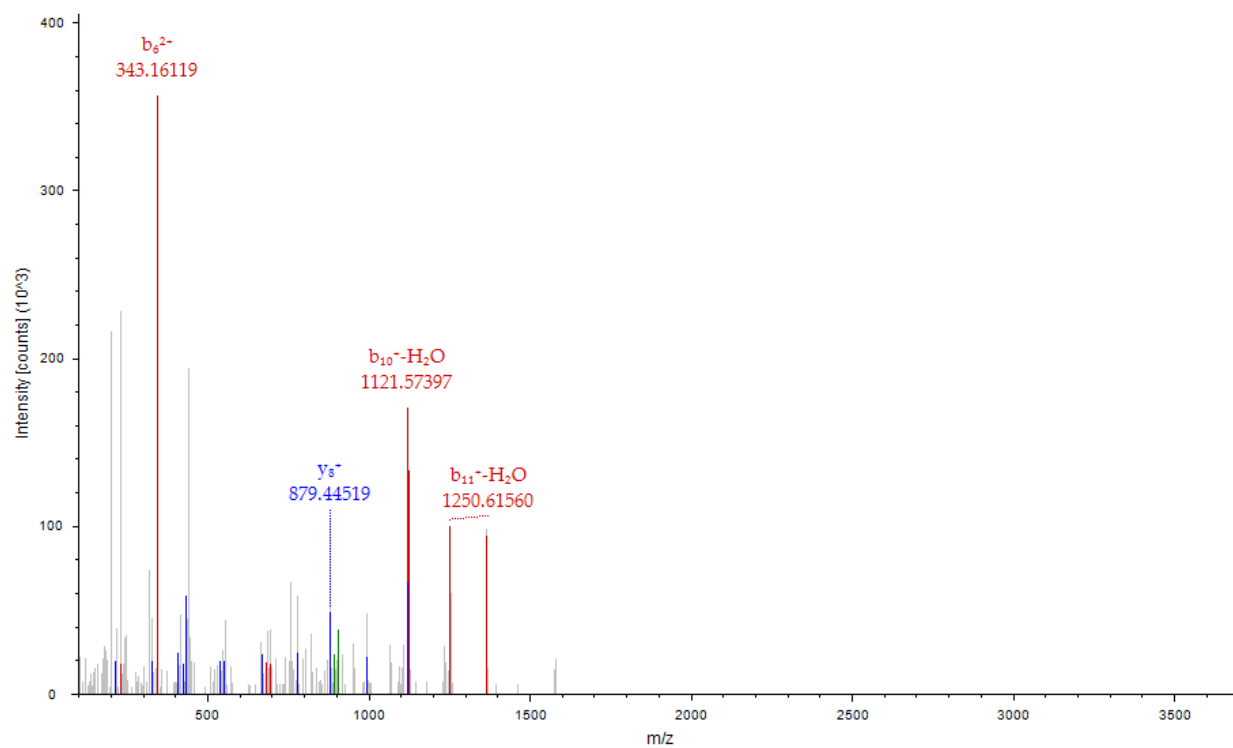

# FKLTEIQVEAILNTR

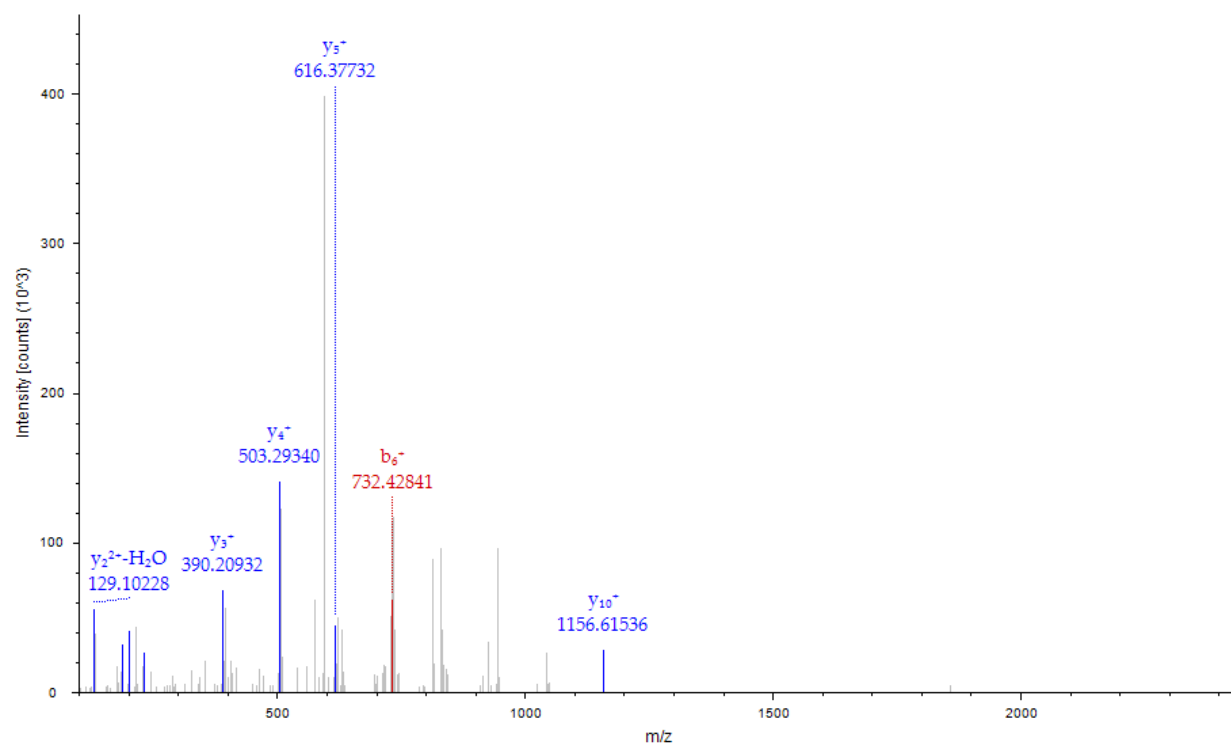

VNNVDLEDYQVINVEHSHEAAK

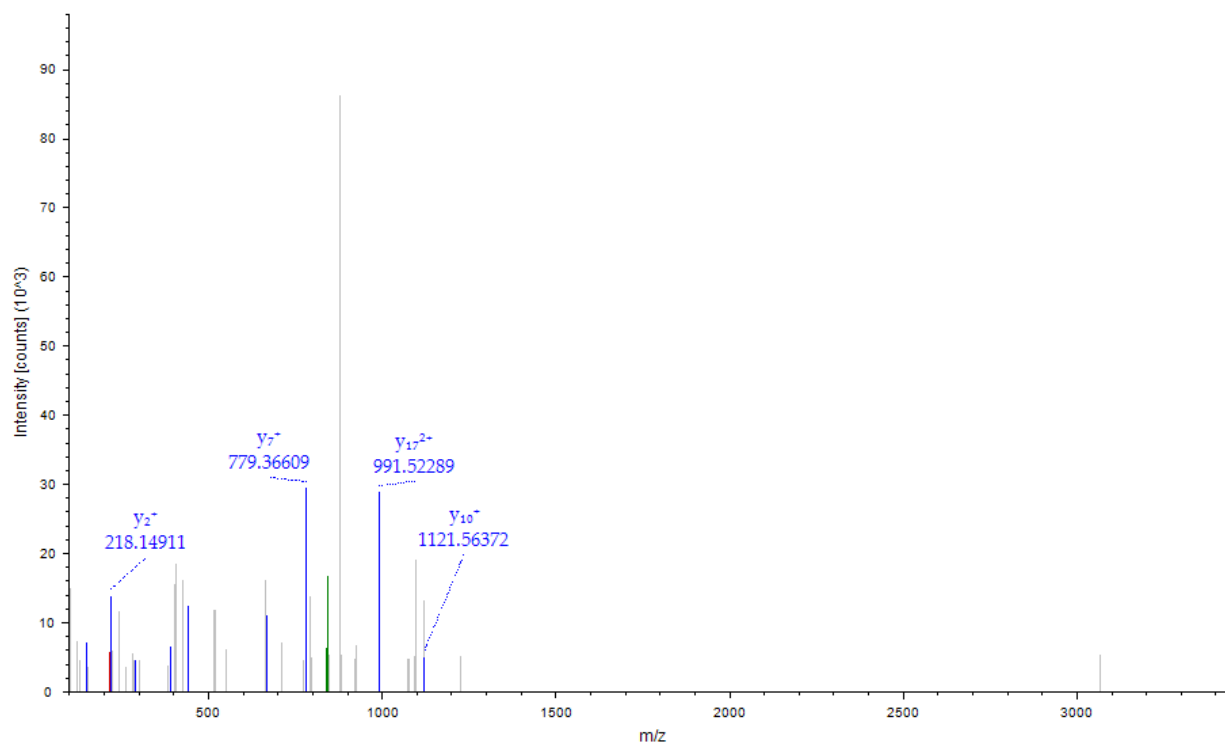

LNNISEDFGTAINIQEMVFGN LGK

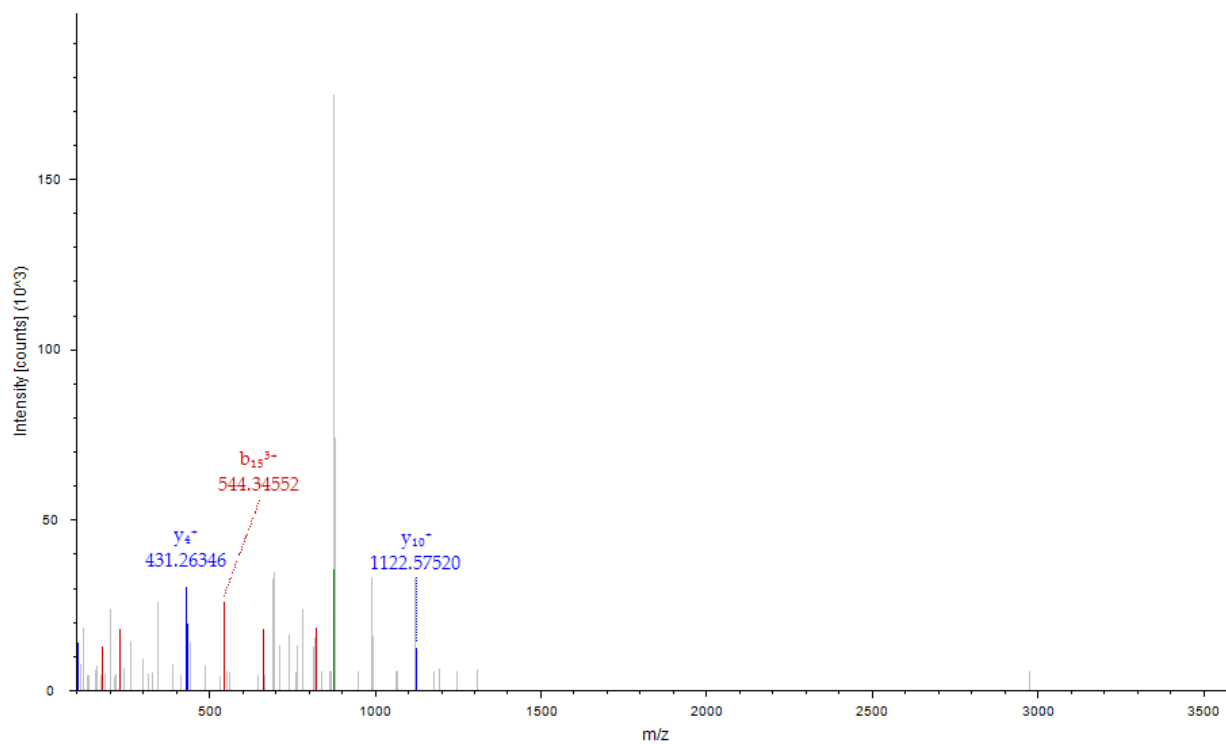

# FGTTGQEILSIEQLIAMIK

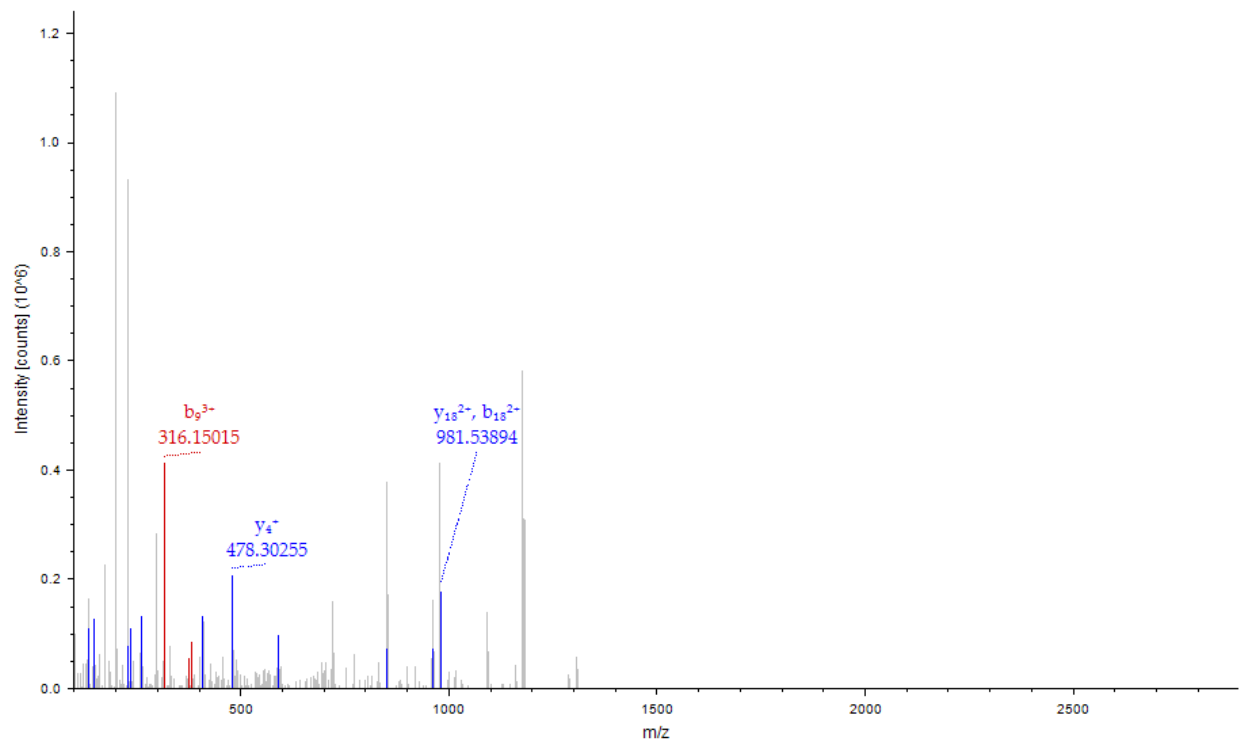

IYNFLGLSVGCIVAGMTDEAK

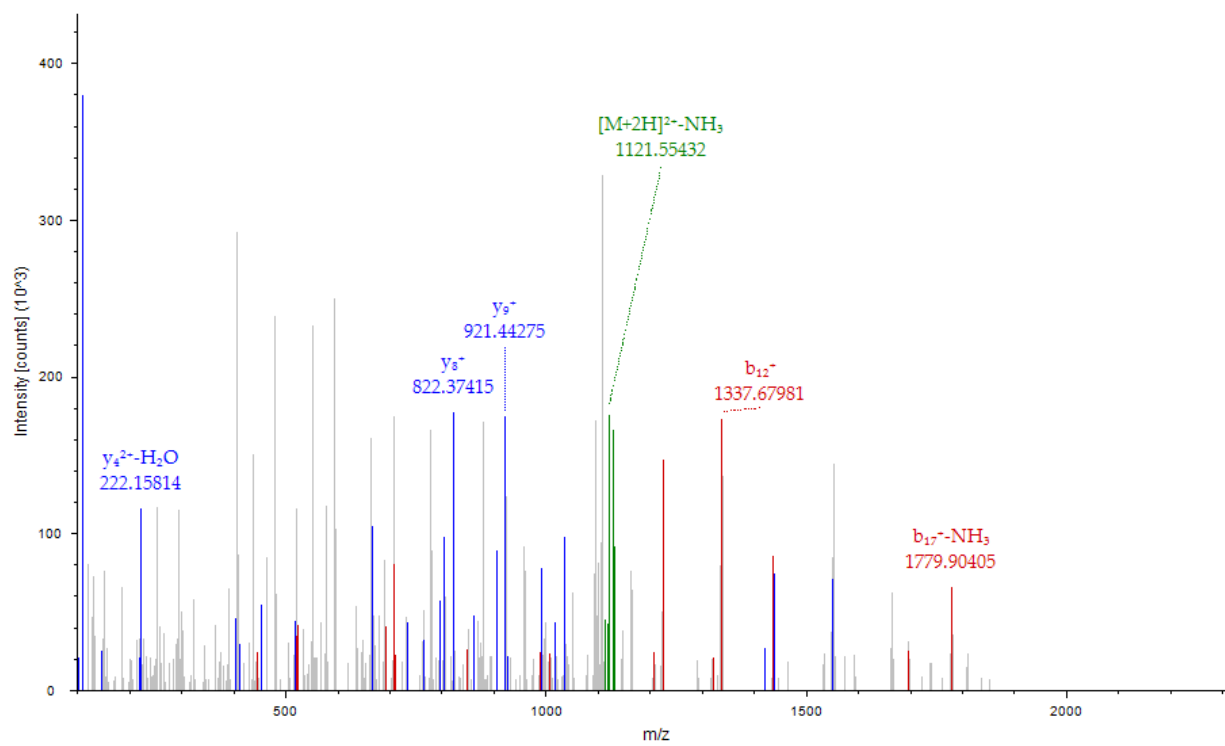

# TALPDADK

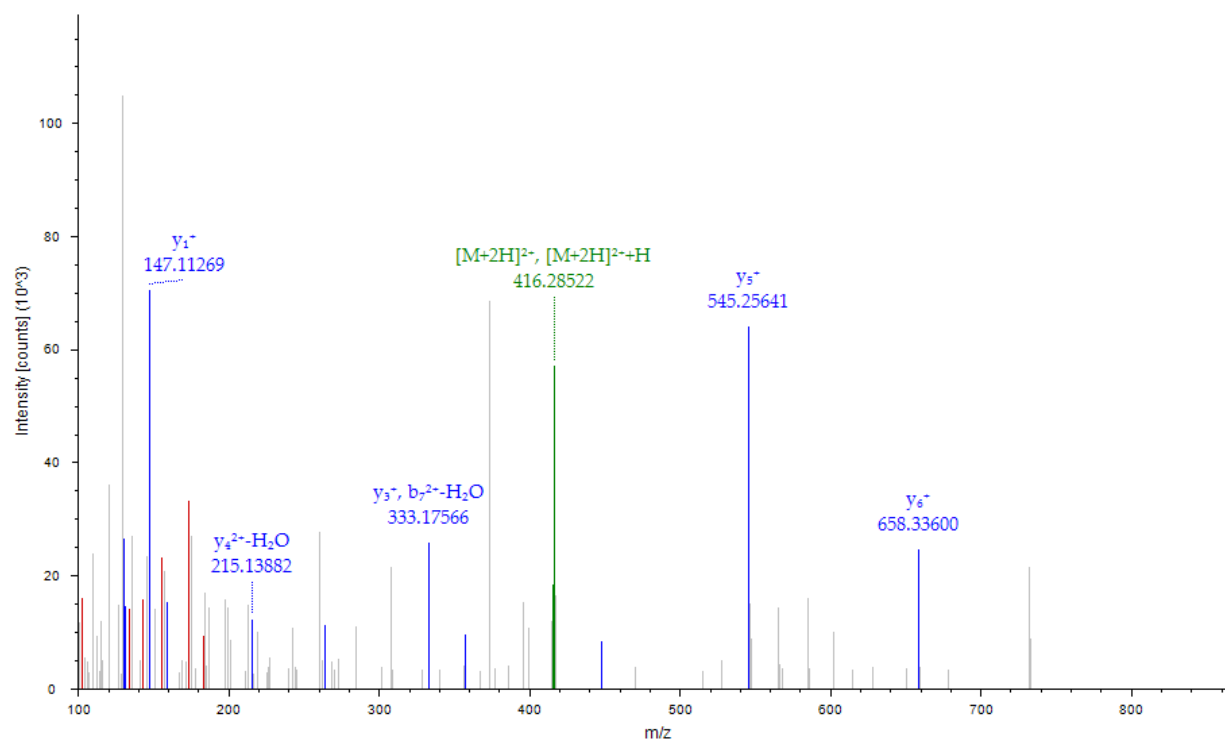

# TINSDQAQAK

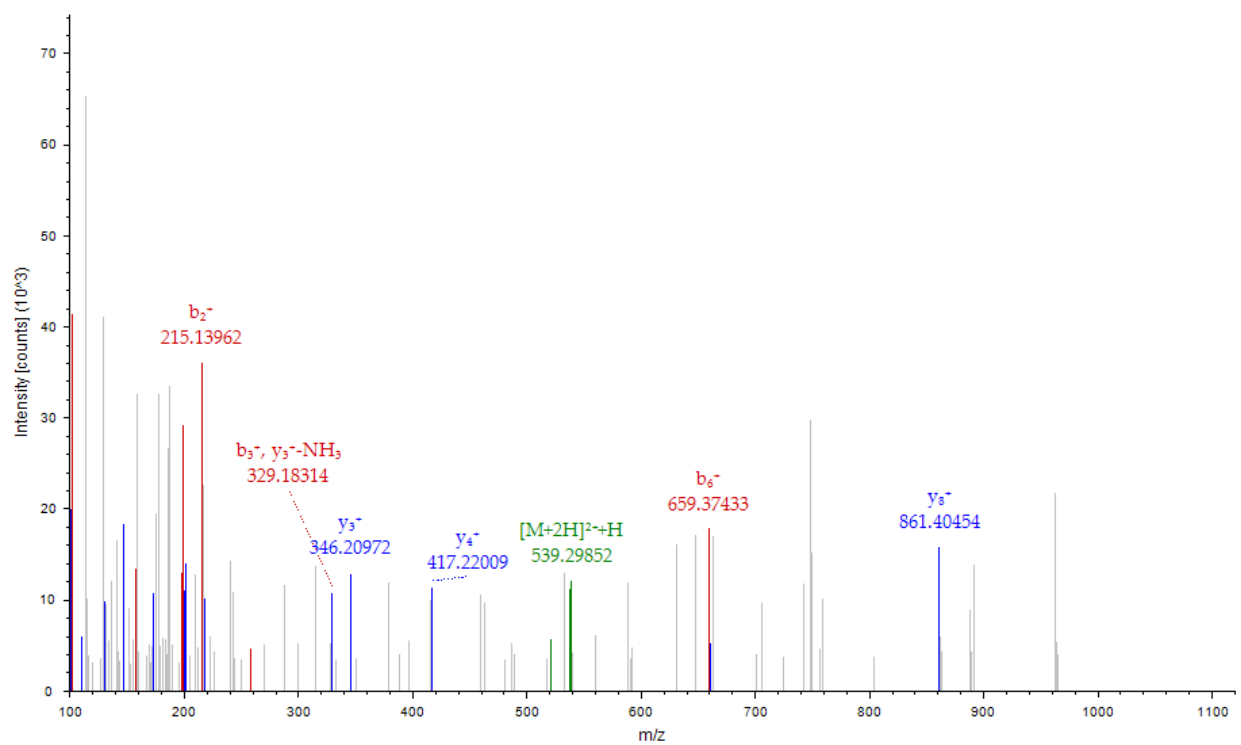

Supplement: 10.1074_M115.054361_mcp.M115.054361-3.pdf [file 10.1074_M115.054361_mcp.M115.054361-3.pdf]
