# Supplementary material
Source: PubMed Central journal article supplement (PMC4762516)
Supplement: 10.1074_M115.054361_mcp.M115.054361-1.pdf [file 10.1074_M115.054361_mcp.M115.054361-1.pdf]

| Parameter                                        | Value                                           |
|--------------------------------------------------|-------------------------------------------------|
| Version                                          | 1.4.1.2                                         |
| Fixed modifications                              | Carbamidomethyl (C)                             |
| Decoy mode                                       | revert                                          |
| Special AAs                                      | KR                                              |
| Include contaminants                             | TRUE                                            |
| MS/MS tol. (FTMS)                                | 20 ppm                                          |
| Top MS/MS peaks per 100 Da. (FTMS)               | 12                                              |
| MS/MS deisotoping (FTMS)                         | TRUE                                            |
| MS/MS tol. (ITMS)                                | 0.5 Da                                          |
| Top MS/MS peaks per 100 Da. (ITMS)               | 8                                               |
| MS/MS deisotoping (ITMS)                         | FALSE                                           |
| MS/MS tol. (TOF)                                 | 0.1 Da                                          |
| Top MS/MS peaks per 100 Da. (TOF)                | 10                                              |
| MS/MS deisotoping (TOF)                          | FALSE                                           |
| MS/MS tol. (Unknown)                             | 0.5 Da                                          |
| Top MS/MS peaks per 100 Da. (Unknown)            | 10                                              |
| MS/MS deisotoping (Unknown)                      | FALSE                                           |
| PSM FDR                                          | 0.01                                            |
| Protein FDR                                      | 0.01                                            |
| Site FDR                                         | 0.01                                            |
| Use Normalized Ratios For Occupancy              | TRUE                                            |
| Min. peptide Length                              | 5                                               |
| Min. score for unmodified peptides               | 0                                               |
| Min. score for modified peptides                 | 40                                              |
| Min. delta score for unmodified peptides         | 0                                               |
| Min. delta score for modified peptides           | 17                                              |
| Min. unique peptides                             | 0                                               |
| Min. razor peptides                              | 1                                               |
| Min. peptides                                    | 1                                               |
| Use only unmodified peptides and                 | TRUE                                            |
| Modifications included in protein quantification | Acetyl (Protein N-term);Oxidation (M)           |
| Peptides used for protein quantification         | Razor                                           |
| Discard unmodified counterpart peptides          | TRUE                                            |
| Min. ratio count                                 | 1                                               |
| Site quantification                              | Use least modified peptide                      |
| Re-quantify                                      | TRUE                                            |
| Use delta score                                  | FALSE                                           |
| iBAQ                                             | FALSE                                           |
| iBAQ log fit                                     | FALSE                                           |
| MS/MS recalibration                              | FALSE                                           |
| Match between runs                               | FALSE                                           |
| Find dependent peptides                          | FALSE                                           |
| Fasta file                                       | C:\Xcalibur\Database\uniprot_sprot_2013_2_21_Hi |
| Labeled amino acid filtering                     | TRUE                                            |
| Site tables                                      | Oxidation (M)Sites.txt                          |
| Cut peaks                                        | TRUE                                            |

|                            |        |
|----------------------------|--------|
| Decoy mode                 | revert |
| Special AAs                | KR     |
| Include contaminants       | TRUE   |
| RT shift                   | FALSE  |
| Advanced ratios            | FALSE  |
| AIF correlation            | 0.47   |
| First pass AIF correlation | 0.8    |
| AIF topx                   | 20     |
| AIF min mass               | 0      |
| AIF SIL weight             | 4      |
| AIF ISO weight             | 2      |
| AIF iterative              | TRUE   |
| AIF threshold FDR          | 0.01   |
